# Supplementary material for: Straightforward access to fluoroalkyl tetrazoles from fluoroalkylN-sulfonylhydrazones
Source: Royal Society of Chemistry journal article supplement (doi:10.1039/d2qo00962e), 2022-01-01
Supplement: d2qo00962e1.pdf [file d2qo00962e1.pdf]

*Supporting Information for*

**Straightforward access to Fluoroalkyl Tetrazoles from  
Fluoroalkyl *N*-sulfonylhydrazones**

Zhongxue Fang, <sup>a</sup> Yujie Zhang, <sup>a</sup> Hongwei Wang, <sup>b</sup> Giuseppe Zanoni, <sup>c</sup> Jianxin Li, <sup>b</sup>  
Xingqi Li, <sup>b</sup> Zhaohong Liu, <sup>\*b</sup> and Yongquan Ning<sup>\*b</sup>

<sup>a</sup>School of Chemistry and Environmental Engineering, Yancheng Teachers University, Yancheng City 224007,  
People's Republic of China; <sup>b</sup>Jilin Province Key Laboratory of Organic Functional Molecular Design & Synthesis,  
Department of Chemistry, Northeast Normal University, Changchun 130024, China; <sup>c</sup> Department of Chemistry,  
University of Pavia, Viale Taramelli 12, Pavia 27100, Italy.

Email: [liuzh944@nenu.edu.cn](mailto:liuzh944@nenu.edu.cn), [ningyq508@nenu.edu.cn](mailto:ningyq508@nenu.edu.cn)

**Contents**

|                                                                                                        |     |
|--------------------------------------------------------------------------------------------------------|-----|
| <b>I.</b> General information .....                                                                    | S2  |
| <b>II.</b> The synthesis of fluoroalkyl <i>N</i> -benzenesulfonylhydrazones.....                       | S2  |
| <b>III.</b> Optimization of the reaction conditions for CF <sub>3</sub> -substituted tetrazole 39..... | S3  |
| <b>IV.</b> General procedures for synthesis fluoroalkyl tetrazoles.....                                | S3  |
| <b>V.</b> Characterization data of prepared compounds.....                                             | S5  |
| <b>VI.</b> Copies of NMR spectra.....                                                                  | S31 |

## I. General information

All reagents were purchased from commercial sources and used without purification unless otherwise mentioned. The products were purified by column chromatography over silica gel (300-400). NMR spectra were recorded on a Brüker Advance 600 ( $^1\text{H}$ : 600 MHz,  $^{13}\text{C}$ : 150 MHz) and Brüker Advance 500 ( $^1\text{H}$ : 500 MHz,  $^{13}\text{C}$ : 125 MHz,  $^{19}\text{F}$ : 471 MHz) at ambient temperature. Data were reported as chemical shifts in ppm relative to TMS (0.00 ppm) for  $^1\text{H}$  and  $\text{CDCl}_3$  (77.0 ppm) for  $^{13}\text{C}$ . The following abbreviations were used to explain the multiplicities: s = singlet, d = doublet, t = triplet, q = quartet, m = multiplet, br = broad. Mass spectra were recorded on BRUKER AutoflexIII Smartbeam MS-spectrometer. High-resolution mass spectra (HRMS) were recorded on Bruck microTof by using ESI method.

## II. General procedures for the synthesis of fluoroalkyl *N*-sulfonylhydrazones.

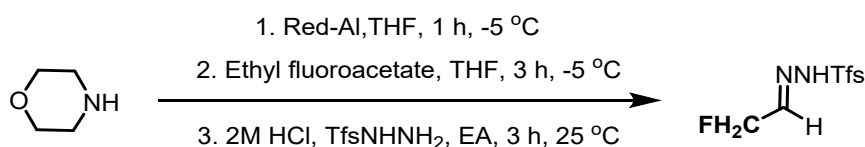

In a -5 °C low temperature bath, a 100 mL bottom flask was placed as the reaction vessel and nitrogen was replaced three times, morpholine (14 mmol) and THF (10 mL) were added to the bottom flask, Red-Al (12 mmol, 4.4 mL) was slowly dropwise into the mixture, the reaction stirred at -5 °C for 1 hour. Add ethyl fluoroacetate and THF to the reaction system and continue to stir at -5 °C for 3 h. After that, quench the reaction system with 2M HCl (60 mL) until the solid disappears completely, add 2-(trifluoromethyl)benzenesulfonylhydrazide (TfSNHNH<sub>2</sub>) (5 mmol) and EA, the mixture was moved to 25 °C and stir for 3 h. The progress of the reaction was monitored by TLC (PE: EA = 5:1 to 4:1). After completion, the reaction mixture was concentrated under reduced pressure and the obtained crude solid was purified by recrystallization with ethyl ether and petroleum ether to obtain the product as a white solid.

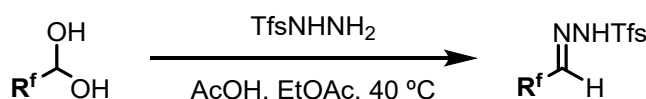

A 250 mL bottom flask was charged with fluoropropionaldehyde hydrate (75.0 mmol), 2-(trifluoromethyl)benzenesulfonylhydrazide (TfsNHNH<sub>2</sub>) (50.0 mmol) and ethyl acetate (200.0 mL). Then acetic acid (5.5 mmol) was added dropwise under N<sub>2</sub> atmosphere and the mixture was stirred at 40 °C for 4-5 h. The progress of the reaction was monitored by TLC (PE: EA = 5:1 to 4:1). After completion, the reaction mixture was concentrated under reduced pressure and the obtained crude solid was purified by column chromatography using PE/EA (5:1 to 4:1) as eluent to afford the product as a white solid.

### III. Optimization of the reaction conditions for CF<sub>3</sub>-substituted tetrazole 39.

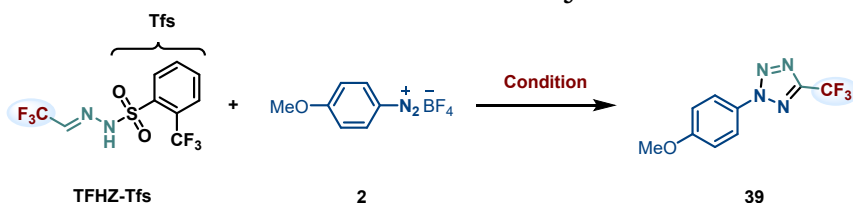

| Entry | Base                            | Solvent     | T (°C) | Yield (%) <sup>[b]</sup> |
|-------|---------------------------------|-------------|--------|--------------------------|
| 1     | NaH                             | 1,4-dioxane | 25     | 90                       |
| 2     | Cs <sub>2</sub> CO <sub>3</sub> | 1,4-dioxane | 25     | 85                       |
| 3     | DBU                             | 1,4-dioxane | 25     | 92                       |
| 4     | Et <sub>3</sub> N               | 1,4-dioxane | 25     | 95                       |
| 5     | DIPEA                           | 1,4-dioxane | 25     | 98                       |
| 6     | DIPEA                           | DMF         | 25     | 66                       |
| 7     | DIPEA                           | THF         | 25     | 95                       |
| 8     | DIPEA                           | DCM         | 25     | 97                       |
| 9     | DIPEA                           | Toluene     | 25     | 67                       |

[a] Reaction conditions: TFHZ-Tfs (0.6 mmol), aryl diazonium salts (0.3 mmol), and base (0.6mmol) in solvent (2 mL) at 25 °C under Ar for 2 h. [b] Isolated yield.

### IV. General procedures for synthesis fluoroalkyl tetrazoles.

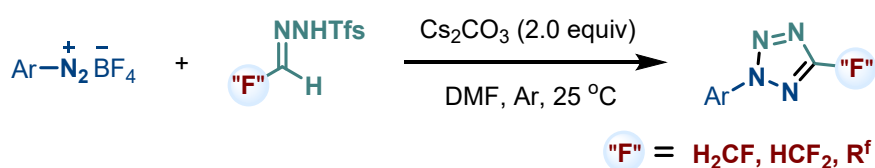

In a 15 mL of Schlenk tube equipped with Teflon coated magnetic stirring bar, aryl diazonium salts (1.0 equiv) in DMF (2 mL) was charged under Ar, then fluoroalkyl *N*-benzenesulfonylhydrazone (2.0 equiv.) and Cs<sub>2</sub>CO<sub>3</sub> (2 equiv.) were added in one portion and the reaction was allowed to stirred at 25 °C for 2 h. After completion, water was added to the mixture and was extracted with EtOAc (3×5 mL). The combined organic layer was dried with anhydrous MgSO<sub>4</sub>, filtered, and evaporated under reduced pressure to give the crude mixture, which was purified by flash column chromatography to afford the pure fluoroalkyl tetrazoles.

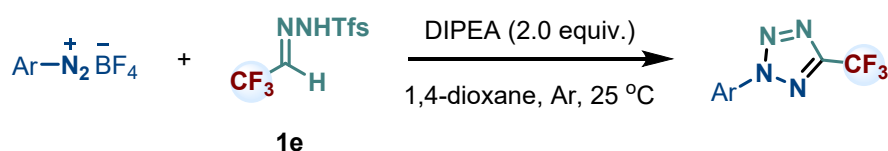

In a 15 mL of Schlenk tube equipped with Teflon coated magnetic stirring bar, aryl diazonium salts (1.0 equiv) in 1,4-dioxane (2 mL) was charged under Ar, then Trifluoroacetaldehyde *N*-Triflylhydrazone (2.0 equiv) and DIPEA (2 equiv) were added in one portion and the reaction was allowed to stirred at 25 °C for 2 h. After completion, water was added to the mixture and was extracted with EtOAc (3×5 mL). The combined organic layer was dried with anhydrous MgSO<sub>4</sub>, filtered, and evaporated under reduced pressure to give the crude mixture, which was purified by flash column chromatography to afford the pure 2-aryl-5-fluoroalkyl-tetrazoles.

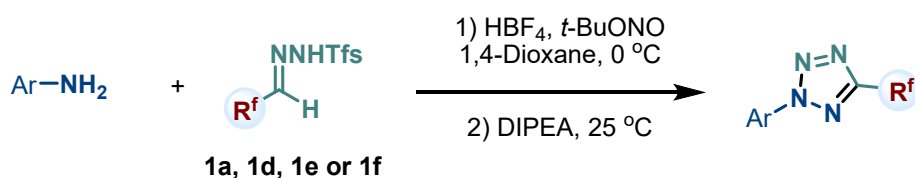

In a 15 mL of Schlenk tube equipped with Teflon coated magnetic stirring bar, was added arylamines (0.3 mmol), HBF<sub>4</sub> (50% in water, 0.6 mmol, 2.0 equiv.), *t*-BuONO (90% tech., 0.33 mmol, 1.1 equiv.), 1,4-dioxane (2.0 mL). Then the reaction was allowed to stir at 0 °C for 15 minutes before the organic base DIPEA (3.0 equiv.) and

fluoroalkyl *N*-benzenesulfonylhydrazone (2.0 equiv.) was added, the mixture was allowed to stir at 25 °C for additional 2 hours. After completion, water was added to the mixture and was extracted with EtOAc (3×5 mL). The combined organic layer was dried with anhydrous MgSO<sub>4</sub>, filtered, and evaporated under reduced pressure to give the crude mixture, which was purified by flash column chromatography to afford the pure 2-aryl-5-fluoroalkyl-tetrazoles.

#### IV. Characterization data of prepared compounds

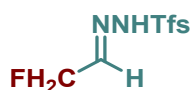

**(1a)** <sup>1</sup>H NMR (500 MHz, DMSO) δ 12.22 (s, 1H), 8.06-7.88 (m, 4H), 7.52 (s, 1H), 4.93 (d, *J* = 47.0, 2H). <sup>13</sup>C NMR (125 MHz, DMSO) δ 144.8 (d, *J* = 21.3 Hz), 138.3, 134.1, 133.9, 131.6, 129.1 (q, *J* = 6.3 Hz), 126.9 (q, *J* = 32.5 Hz), 82.3 (d, *J* = 160.0 Hz). <sup>19</sup>F NMR (471 MHz, DMSO) δ -56.36 (s), (-221.38)-(-221.60) (m).

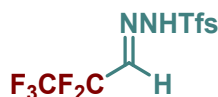

**(1f)** <sup>1</sup>H NMR (500 MHz, DMSO) δ 13.08 (s, 1H), 8.13-8.10 (m, 1H), 8.04-7.99 (m, 1H), 7.94-7.89 (m, 2H), 7.56-7.53 (m, 1H). <sup>13</sup>C NMR (150 MHz, DMSO) δ 137.3, 134.7, 134.0, 132.7 (t, *J* = 30.0 Hz), 132.3, 129.1 (q, *J* = 6.0 Hz), 127.1 (q, *J* = 34.5 Hz), 119.5 (qt, *J* = 285.0, 45.0 Hz), 110.3 (tq, *J* = 249.0, 39.0 Hz). <sup>19</sup>F NMR (471 MHz, DMSO) δ -56.65 (s), -83.02 (s), -115.71 (s).

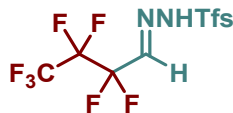

**(1g)** <sup>1</sup>H NMR (500 MHz, CDCl<sub>3</sub>) δ 9.14 (m, 1H), 8.35-8.32 (m, 1H), 7.92-7.90 (m, 1H), 7.80-7.77 (m, 2H), 7.21-7.18 (m, 1H). <sup>13</sup>C NMR (125 MHz, DMSO) δ 135.6, 134.2, 133.4, 133.0 (t, *J* = 28.8 Hz), 132.7, 128.5 (q, *J* = 6.3 Hz), 127.9 (q, *J* = 32.5 Hz), 119.3-107.9 (m). <sup>19</sup>F NMR (471 MHz, DMSO) δ -53.34 (s), (-80.63)-(-80.66) (m), (-115.95)-(-115.99) (m), -127.65 (s).

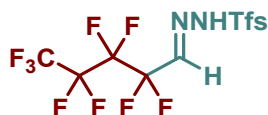

(**1j**)  $^1\text{H NMR}$  (500 MHz,  $\text{CDCl}_3$ )  $\delta$  9.14 (s, 1H), 8.36-8.34 (m, 1H), 7.92-7.90 (m, 1H), 7.80-7.78 (m, 2H), 7.19-7.16 (m, 1H).  $^{13}\text{C NMR}$  (125 MHz, DMSO)  $\delta$  137.5, 134.6, 133.7, 132.7 (t,  $J = 26.3$  Hz), 132.6, 129.0 (q,  $J = 6.3$  Hz), 127.5 (q,  $J = 33.8$  Hz), 120.9-110.1 (m).  $^{19}\text{F NMR}$  (471 MHz, DMSO)  $\delta$  -(-58.31)-(-58.43) (m), (-81.01)-(-81.11) (m), (-115.03)-(-115.08) (m), (-124.14)-(-124.25) (m), (-125.79)-(-125.88) (m).

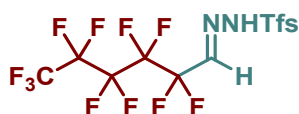

(**1i**)  $^1\text{H NMR}$  (500 MHz, DMSO)  $\delta$  13.14 (s, 1H), 8.13-8.12 (m, 1H), 8.03-7.98 (m, 1H), 7.94-7.88 (m, 2H), 7.56-7.52 (m, 1H).  $^{13}\text{C NMR}$  (125 MHz, DMSO)  $\delta$  137.1, 134.7, 134.0, 133.8, 132.6 (t,  $J = 27.5$  Hz), 132.4, 129.1-110.1 (m).  $^{19}\text{F NMR}$  (471 MHz, DMSO)  $\delta$  -56.89 (s), -80.70 (s), -113.93 (s), -122.39 (s), -123.65 (s), 126.34 (s).

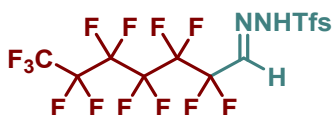

(**1j**)  $^1\text{H NMR}$  (500 MHz, DMSO)  $\delta$  8.12-8.11 (m, 1H), 7.96-7.95 (m, 1H), 7.89-7.83 (m, 2H), 7.52-7.50 (m, 1H).  $^{13}\text{C NMR}$  (125 MHz, DMSO)  $\delta$  137.2, 134.5, 133.9, 133.7, 132.6 (t,  $J = 27.5$  Hz), 132.4, 128.9-108.6 (m).  $^{19}\text{F NMR}$  (471 MHz, DMSO)  $\delta$  -57.13 (s), -81.24 (s), (-104.36)-(-126.68) (m).

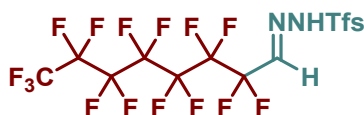

(**1k**)  $^1\text{H NMR}$  (500 MHz, DMSO)  $\delta$  8.12-8.10 (m, 1H), 7.93-7.91 (m, 1H), 7.85-7.81 (m, 2H), 7.50-7.47 (m, 1H).  $^{13}\text{C NMR}$  (125 MHz, DMSO)  $\delta$  137.2, 134.3, 134.0, 133.5, 132.6 (t,  $J = 27.5$  Hz), 132.4, 128.8-108.9 (m).  $^{19}\text{F NMR}$  (471 MHz, DMSO)  $\delta$  -57.30 (s), -81.75 (s), (-104.95)-(-126.26) (m).

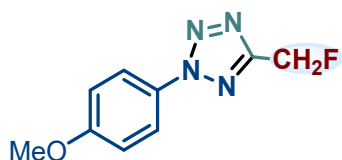

(3) White solid, m.p. 61–62 °C;  $^1\text{H NMR}$  (500 MHz,  $\text{CDCl}_3$ )  $\delta$  8.05–8.02 (m, 2H), 7.05–7.02 (m, 2H), 5.73 (d,  $J = 47.5$  Hz, 2H), 3.88 (s, 3H).  $^{13}\text{C NMR}$  (125 MHz,  $\text{CDCl}_3$ )  $\delta$  161.4 (d,  $J = 20.0$  Hz), 160.8, 130.1, 121.5, 114.7, 75.2 (d,  $J = 167.5$  Hz), 55.6.  $^{19}\text{F NMR}$  (471 MHz,  $\text{CDCl}_3$ )  $\delta$  -216.73 (t,  $J = 48.0$  Hz). HRMS (ESI)  $m/z$  calcd. for  $\text{C}_9\text{H}_9\text{FN}_4\text{ONa}$   $[\text{M}+\text{Na}]^+$  231.0760, found 231.0768.

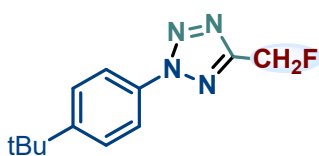

(4) White solid, m.p. 53–54 °C;  $^1\text{H NMR}$  (500 MHz,  $\text{CDCl}_3$ )  $\delta$  8.05–8.03 (m, 2H), 7.58–7.58 (m, 2H), 5.75 (d,  $J = 47.5$  Hz, 2H), 1.37 (s, 9H).  $^{13}\text{C NMR}$  (125 MHz,  $\text{CDCl}_3$ )  $\delta$  161.6 (d,  $J = 20.0$  Hz), 153.6, 134.2, 126.6, 119.7, 75.2 (d,  $J = 167.5$  Hz), 34.9, 31.2.  $^{19}\text{F NMR}$  (471 MHz,  $\text{CDCl}_3$ )  $\delta$  -216.87 (t,  $J = 47.6$  Hz). HRMS (ESI)  $m/z$  calcd. for  $\text{C}_{12}\text{H}_{15}\text{FN}_4\text{Na}$   $[\text{M}+\text{Na}]^+$  257.1289, found 257.1287.

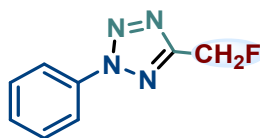

(5) Colorless oil;  $^1\text{H NMR}$  (500 MHz,  $\text{CDCl}_3$ )  $\delta$  8.14–8.13 (m, 2H), 7.58–7.50 (m, 3H), 5.76 (d,  $J = 47.5$  Hz, 2H).  $^{13}\text{C NMR}$  (125 MHz,  $\text{CDCl}_3$ )  $\delta$  161.7 (d,  $J = 20.0$  Hz), 136.6, 130.1, 129.7, 120.0, 75.2 (d,  $J = 167.5$  Hz).  $^{19}\text{F NMR}$  (471 MHz,  $\text{CDCl}_3$ )  $\delta$  -217.15 (t,  $J = 48.5$  Hz). HRMS (ESI)  $m/z$  calcd. for  $\text{C}_8\text{H}_7\text{FN}_4\text{Na}$   $[\text{M}+\text{Na}]^+$  201.0548, found 201.0542.

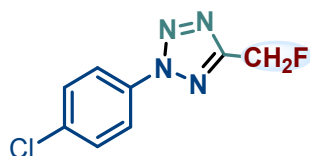

(6) White solid, m.p. 58–60 °C;  $^1\text{H NMR}$  (500 MHz,  $\text{CDCl}_3$ )  $\delta$  8.11–8.09 (m, 2H), 7.56–7.54 (m, 2H), 5.75 (d,  $J = 47.5$  Hz, 2H).  $^{13}\text{C NMR}$  (150 MHz,  $\text{CDCl}_3$ )  $\delta$  161.9 (d,  $J = 24.5$  Hz), 136.1, 135.0, 130.0, 121.2, 75.1 (d,  $J = 201.8$  Hz).  $^{19}\text{F NMR}$  (565 MHz,  $\text{CDCl}_3$ )  $\delta$  -217.52 (t,  $J = 46.9$

Hz). HRMS (ESI)  $m/z$  calcd. for  $C_8H_6ClFN_4Na$   $[M+Na]^+$  235.0799, found 235.0792.

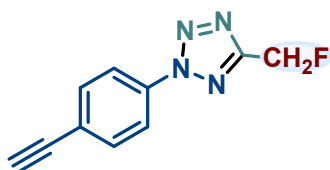

(7) White solid, m.p. 71–73 °C;  $^1H$  NMR (500 MHz,  $CDCl_3$ )  $\delta$  8.13–8.11 (m, 2H), 7.69–7.67 (m, 2H), 5.76 (d,  $J = 47.5$  Hz, 2H), 3.23 (s, 1H).  $^{13}C$  NMR (125 MHz,  $CDCl_3$ )  $\delta$  161.9 (d,  $J = 21.3$  Hz), 136.2, 133.5, 124.2, 119.8, 82.0, 79.8, 75.1 (d,  $J = 168.8$  Hz).  $^{19}F$  NMR (471 MHz,  $CDCl_3$ )  $\delta$  -217.54 (t,  $J = 47.6$  Hz). HRMS (ESI)  $m/z$  calcd. for  $C_{10}H_7FN_4Na$   $[M+Na]^+$  225.0548, found 225.0549.

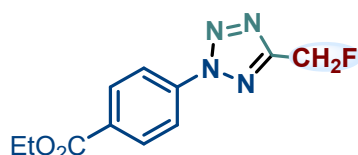

(8) White solid, m.p. 125–126 °C;  $^1H$  NMR (500 MHz,  $CDCl_3$ )  $\delta$  8.26–8.22 (m, 4H), 5.77 (d,  $J = 47.0$  Hz, 2H), 4.43 (q,  $J = 7.0$  Hz, 2H), 1.43 (t,  $J = 7.5$  Hz, 3H).  $^{13}C$  NMR (150 MHz,  $CDCl_3$ )  $\delta$  165.2, 162.0 (d,  $J = 19.5$  Hz), 139.3, 131.9, 131.2, 119.7, 75.0 (d,  $J = 169.5$  Hz), 61.6, 14.3.  $^{19}F$  NMR (471 MHz,  $CDCl_3$ )  $\delta$  -217.83 (t,  $J = 47.6$  Hz). HRMS (ESI)  $m/z$  calcd. for  $C_{11}H_{11}FN_4O_2Na$   $[M+Na]^+$  273.0951, found 273.0955.

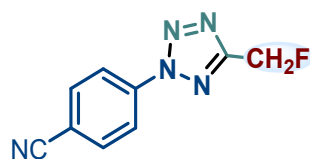

(9) Yellow oil;  $^1H$  NMR (600 MHz,  $CDCl_3$ )  $\delta$  8.33–8.31 (m, 2H), 7.91–7.89 (m, 2H), 5.77 (d,  $J = 47.4$  Hz, 2H).  $^{13}C$  NMR (150 MHz,  $CDCl_3$ )  $\delta$  162.3 (d,  $J = 19.5$  Hz), 139.0, 133.9, 120.4, 117.4, 114.0, 74.9 (d,  $J = 169.5$  Hz).  $^{19}F$  NMR (565 MHz,  $CDCl_3$ )  $\delta$  -218.34 (t,  $J = 47.5$  Hz). HRMS (ESI)  $m/z$  calcd. for  $C_9H_6FN_5Na$   $[M+Na]^+$  226.0514, found 226.0518.



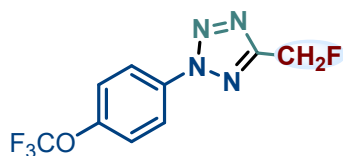

(10) Colorless oil;  $^1\text{H NMR}$  (500 MHz,  $\text{CDCl}_3$ )  $\delta$  8.22-8.19 (m, 2H), 7.44-7.42 (m, 2H), 5.76 (d,  $J = 47.0$  Hz, 2H).  $^{13}\text{C NMR}$  (150 MHz,  $\text{CDCl}_3$ )  $\delta$  162.0 (d,  $J = 21.0$  Hz), 150.1, 134.8, 122.2, 121.6, 121.2 (q,  $J = 256.5$  Hz), 75.0 (d,  $J = 168.0$  Hz).  $^{19}\text{F NMR}$  (565 MHz,  $\text{CDCl}_3$ )  $\delta$  -57.95 (s), -217.68 (t,  $J = 46.9$  Hz). HRMS (ESI)  $m/z$  calcd. for  $\text{C}_9\text{H}_6\text{F}_4\text{N}_4\text{ONa}$   $[\text{M}+\text{Na}]^+$  285.0513, found 285.0516.

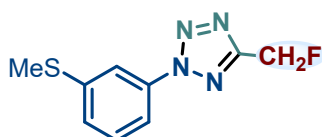

(11) Yellow solid, m.p. 75–76 °C;  $^1\text{H NMR}$  (600 MHz,  $\text{CDCl}_3$ )  $\delta$  7.98 (s, 1H), 7.88-7.87 (m, 1H), 7.47-7.44 (m, 1H), 7.37-7.35 (m, 1H), 5.75 (d,  $J = 47.5$  Hz, 2H), 2.57 (s, 3H).  $^{13}\text{C NMR}$  (150 MHz,  $\text{CDCl}_3$ )  $\delta$  161.7 (d,  $J = 19.5$  Hz), 141.6, 137.0, 129.9, 127.5, 116.9, 116.1, 75.0 (d,  $J = 168.0$  Hz), 15.4.  $^{19}\text{F NMR}$  (565 MHz,  $\text{CDCl}_3$ )  $\delta$  -217.26 (t,  $J = 47.5$  Hz). HRMS (ESI)  $m/z$  calcd. for  $\text{C}_9\text{H}_9\text{FN}_4\text{SNa}$   $[\text{M}+\text{Na}]^+$  247.0432, found 247.0430.

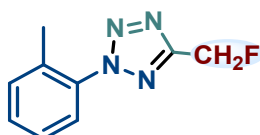

(12) Colorless oil;  $^1\text{H NMR}$  (500 MHz,  $\text{CDCl}_3$ )  $\delta$  7.60-7.59 (m, 1H), 7.48-7.45 (m, 1H), 7.42-7.37 (m, 2H), 5.77 (d,  $J = 47.5$  Hz, 2H), 2.37 (s, 3H).  $^{13}\text{C NMR}$  (125 MHz,  $\text{CDCl}_3$ )  $\delta$  161.4 (d,  $J = 20.0$  Hz), 136.1, 133.0, 131.9, 130.6, 126.9, 125.2, 75.2 (d,  $J = 167.5$  Hz), 18.6.  $^{19}\text{F NMR}$  (471 MHz,  $\text{CDCl}_3$ )  $\delta$  -217.27 (t,  $J = 48.5$  Hz). HRMS (ESI)  $m/z$  calcd. for  $\text{C}_9\text{H}_9\text{FN}_4\text{Na}$   $[\text{M}+\text{Na}]^+$  215.0733, found 215.0739.

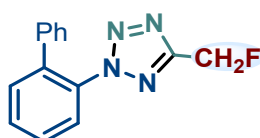

(13) White solid, m.p. 63–65 °C;  $^1\text{H NMR}$  (500 MHz,  $\text{CDCl}_3$ )  $\delta$  7.68-7.54 (m, 4H), 7.28-7.24 (m, 3H), 7.06-7.04 (m, 2H), 5.60 (d,  $J = 47.0$  Hz, 2H).  $^{13}\text{C NMR}$  (125 MHz,  $\text{CDCl}_3$ )  $\delta$  161.3 (d,  $J =$

21.3 Hz), 138.4, 137.1, 134.8, 131.4, 131.2, 128.5, 128.3, 128.2, 127.9, 126.4, 74.9 (d,  $J = 167.5$  Hz).  $^{19}\text{F}$  NMR (471 MHz,  $\text{CDCl}_3$ )  $\delta$  -216.77 (t,  $J = 47.1$  Hz). HRMS (ESI)  $m/z$  calcd. for  $\text{C}_{14}\text{H}_{11}\text{FN}_4\text{Na}$   $[\text{M}+\text{Na}]^+$  277.0955, found 277.0952.

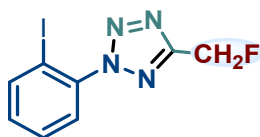

(14) Yellow oil;  $^1\text{H}$  NMR (500 MHz,  $\text{CDCl}_3$ )  $\delta$  8.07-8.06 (m, 1H), 7.58-7.51 (m, 2H), 7.34-7.31 (m, 1H), 5.80 (d,  $J = 47.0$  Hz, 2H).  $^{13}\text{C}$  NMR (125 MHz,  $\text{CDCl}_3$ )  $\delta$  161.7 (d,  $J = 20.0$  Hz), 140.7, 139.9, 132.4, 129.2, 127.6, 92.5, 75.1 (d,  $J = 168.8$  Hz).  $^{19}\text{F}$  NMR (471 MHz,  $\text{CDCl}_3$ )  $\delta$  -217.33 (t,  $J = 47.1$  Hz). HRMS (ESI)  $m/z$  calcd. for  $\text{C}_8\text{H}_6\text{FIN}_4\text{Na}$   $[\text{M}+\text{Na}]^+$  326.9602, found 326.9607.

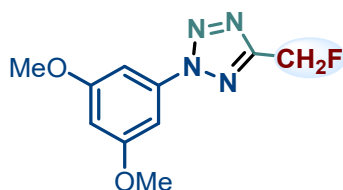

(15) White solid, m.p. 106–108 °C;  $^1\text{H}$  NMR (500 MHz,  $\text{CDCl}_3$ )  $\delta$  7.30-7.29 (m, 2H), 6.57-6.56 (m, 1H), 5.74 (d,  $J = 47.5$  Hz, 2H), 3.87 (s, 6H).  $^{13}\text{C}$  NMR (125 MHz,  $\text{CDCl}_3$ )  $\delta$  161.6 (d,  $J = 21.3$  Hz), 161.5, 137.9, 102.4, 98.3, 75.2 (d,  $J = 167.5$  Hz), 55.8.  $^{19}\text{F}$  NMR (471 MHz,  $\text{CDCl}_3$ )  $\delta$  -217.22 (t,  $J = 48.0$  Hz). HRMS (ESI)  $m/z$  calcd. for  $\text{C}_{10}\text{H}_{11}\text{FN}_4\text{O}_2\text{Na}$   $[\text{M}+\text{Na}]^+$  261.0853, found 261.0850.

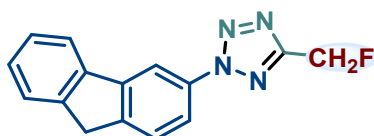

(16) Yellow solid, m.p. 123–125 °C;  $^1\text{H}$  NMR (500 MHz,  $\text{CDCl}_3$ )  $\delta$  8.27 (s, 1H), 8.14 (dd,  $J = 8.5$  Hz,  $J = 2.0$  Hz, 1H), 7.89 (d,  $J = 8.0$  Hz, 1H), 7.82 (d,  $J = 7.5$  Hz, 1H), 7.58 (d,  $J = 7.5$  Hz, 1H), 7.44-7.35 (m, 2H), 5.76 (d,  $J = 47.5$  Hz, 2H), 3.98 (s, 2H).  $^{13}\text{C}$  NMR (150 MHz,  $\text{CDCl}_3$ )  $\delta$  161.6 (d,  $J = 19.5$  Hz), 144.6, 143.7, 140.1, 135.1, 127.8, 127.2, 125.2, 120.6, 120.4, 119.0, 116.8, 75.1 (d,  $J = 168.0$  Hz), 37.0.  $^{19}\text{F}$  NMR (565 MHz,  $\text{CDCl}_3$ )  $\delta$  -217.00 (t,  $J = 48.0$  Hz). HRMS (ESI)  $m/z$  calcd. for  $\text{C}_{15}\text{H}_{11}\text{FN}_4\text{Na}$   $[\text{M}+\text{Na}]^+$  289.0977, found 289.9073.

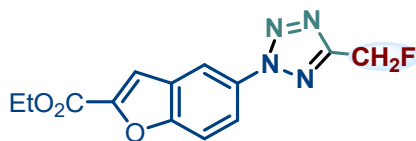

(17) White solid, m.p. 133–134 °C;  $^1\text{H NMR}$  (500 MHz,  $\text{CDCl}_3$ )  $\delta$  8.46 (d,  $J = 2.0$  Hz, 1H), 8.26 (dd,  $J = 9.0$  Hz,  $J = 2.5$  Hz, 1H), 7.77 (d,  $J = 9.0$  Hz, 1H), 7.62 (s, 1H), 5.77 (d,  $J = 47.5$  Hz, 2H), 4.48 (q,  $J = 7.0$  Hz, 2H), 1.45 (t,  $J = 7.0$  Hz, 3H).  $^{13}\text{C NMR}$  (125 MHz,  $\text{CDCl}_3$ )  $\delta$  161.8 (d,  $J = 20.0$  Hz), 158.9, 155.6, 148.0, 133.1, 127.7, 119.8, 114.5, 113.6, 75.2 (d,  $J = 168.8$  Hz), 62.0, 14.3.  $^{19}\text{F NMR}$  (471 MHz,  $\text{CDCl}_3$ )  $\delta$  -216.82 (t,  $J = 47.1$  Hz). HRMS (ESI)  $m/z$  calcd. for  $\text{C}_{13}\text{H}_{11}\text{FN}_4\text{O}_3\text{Na}$   $[\text{M}+\text{Na}]^+$  313.0832, found 313.0835.

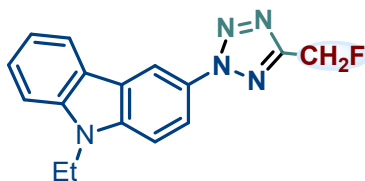

(18) Yellow solid, m.p. 164–165 °C;  $^1\text{H NMR}$  (500 MHz,  $\text{CDCl}_3$ )  $\delta$  8.81 (d,  $J = 2.0$  Hz, 1H), 8.23 (dd,  $J = 8.5$  Hz,  $J = 2.0$  Hz, 1H), 8.17 (d,  $J = 7.5$  Hz, 1H), 7.57–7.46 (m, 3H), 7.32 (t,  $J = 7.5$  Hz, 2H), 5.80 (d,  $J = 47.5$  Hz, 2H), 4.34 (q,  $J = 7.5$  Hz, 2H), 1.50 (t,  $J = 7.5$  Hz, 3H).  $^{13}\text{C NMR}$  (150 MHz,  $\text{CDCl}_3$ )  $\delta$  161.4 (d,  $J = 21.0$  Hz), 140.8, 140.2, 129.1, 126.9, 123.2, 122.6, 120.9, 119.8, 117.8, 112.6, 109.0, 108.9, 75.3 (d,  $J = 201$  Hz), 37.9, 13.8.  $^{19}\text{F NMR}$  (565 MHz,  $\text{CDCl}_3$ )  $\delta$  -216.36 (t,  $J = 58.2$  Hz). HRMS (ESI)  $m/z$  calcd. for  $\text{C}_{16}\text{H}_{14}\text{FN}_5\text{Na}$   $[\text{M}+\text{Na}]^+$  318.0744, found 318.0740.

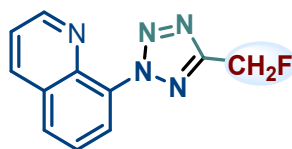

(19) Yellow solid, m.p. 153–155 °C;  $^1\text{H NMR}$  (500 MHz,  $\text{CDCl}_3$ )  $\delta$  8.98 (t,  $J = 2.5$  Hz, 1H), 8.32 (dd,  $J = 8.5$  Hz,  $J = 1.5$  Hz, 1H), 8.11 (d,  $J = 8.0$  Hz, 1H), 8.00 (d,  $J = 7.5$  Hz, 1H), 7.74 (t,  $J = 8.5$  Hz, 1H), 7.57 (dd,  $J = 8.5$  Hz,  $J = 4.5$  Hz, 1H), 5.86 (d,  $J = 47.5$  Hz, 2H).  $^{13}\text{C NMR}$  (125 MHz,  $\text{CDCl}_3$ )  $\delta$  161.7 (d,  $J = 17.5$  Hz), 152.3, 142.2, 136.2, 134.0, 131.5, 129.1, 127.3, 125.7, 122.6, 75.2 (d,  $J = 140.0$  Hz).  $^{19}\text{F NMR}$  (471 MHz,  $\text{CDCl}_3$ )  $\delta$  -216.88 (t,  $J = 39.6$  Hz). HRMS (ESI)  $m/z$  calcd. for  $\text{C}_{11}\text{H}_8\text{FN}_5\text{Na}$   $[\text{M}+\text{Na}]^+$  252.0316, found 252.0315.

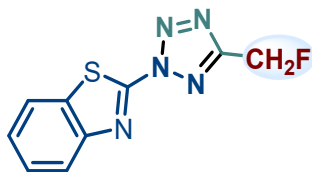

(20) Yellow solid, m.p. 153–155 °C;  $^1\text{H NMR}$  (500 MHz,  $\text{CDCl}_3$ )  $\delta$  9.16 (s, 1H), 8.90 (d,  $J = 1.5$  Hz, 1H), 8.29 (dd,  $J = 8.5$  Hz,  $J = 2.0$  Hz, 1H), 8.15 (d,  $J = 8.5$  Hz, 1H), 5.79 (d,  $J = 47.5$  Hz, 2H).  $^{13}\text{C NMR}$  (125 MHz,  $\text{CDCl}_3$ )  $\delta$  161.9 (d,  $J = 20.0$  Hz), 156.8, 153.6, 135.4, 135.2, 123.2, 117.5, 115.1, 75.1 (d,  $J = 167.5$  Hz).  $^{19}\text{F NMR}$  (471 MHz,  $\text{CDCl}_3$ )  $\delta$  -217.32 (t,  $J = 48.5$  Hz). HRMS (ESI)  $m/z$  calcd. for  $\text{C}_9\text{H}_6\text{FN}_5\text{SNa}$   $[\text{M}+\text{Na}]^+$  258.0316, found 258.0315.

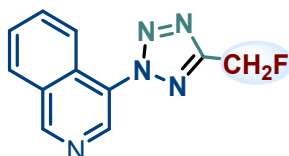

(21) Yellow solid, m.p. 132–134 °C;  $^1\text{H NMR}$  (500 MHz,  $\text{CDCl}_3$ )  $\delta$  9.70 (d,  $J = 2.4$  Hz, 1H), 8.88 (d,  $J = 2.2$  Hz, 1H), 8.21 (d,  $J = 8.5$  Hz, 1H), 7.98 (d,  $J = 8.1$  Hz, 1H), 7.87–7.82 (m, 1H), 7.69 (t,  $J = 7.5$  Hz, 1H), 5.77 (d,  $J = 47.5$  Hz, 2H).  $^{13}\text{C NMR}$  (125 MHz,  $\text{CDCl}_3$ )  $\delta$  162.2 (d,  $J = 20.0$  Hz), 148.4, 142.1, 131.2, 123.0, 129.8, 128.5, 128.5, 127.0, 126.2, 74.5. (d,  $J = 168.8$  Hz).  $^{19}\text{F NMR}$  (471 MHz,  $\text{CDCl}_3$ )  $\delta$  -217.89 (t,  $J = 47.5$  Hz). HRMS (ESI)  $m/z$  calcd. for  $\text{C}_{11}\text{H}_8\text{FN}_5\text{Na}$   $[\text{M}+\text{Na}]^+$  252.0661, found 252.0663.

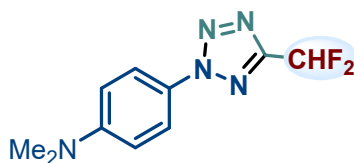

(22) Yellow solid, m.p. 92–94 °C;  $^1\text{H NMR}$  (500 MHz,  $\text{CDCl}_3$ )  $\delta$  7.97–7.94 (m, 2H), 7.01 (t,  $J = 53.0$  Hz, 1H), 6.78–6.75 (m, 2H), 3.06 (s, 6H).  $^{13}\text{C NMR}$  (150 MHz,  $\text{CDCl}_3$ )  $\delta$  159.5 (t,  $J = 28.5$  Hz), 151.5, 125.9, 121.3, 111.8, 107.9 (t,  $J = 237.0$  Hz), 40.3.  $^{19}\text{F NMR}$  (471 MHz,  $\text{CDCl}_3$ )  $\delta$  -116.76 (d,  $J = 44.3$  Hz). HRMS (ESI)  $m/z$  calcd. for  $\text{C}_{10}\text{H}_{11}\text{F}_2\text{N}_5\text{Na}$   $[\text{M}+\text{Na}]^+$  262.0971, found 262.0976.

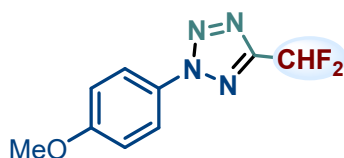

(23) White solid, m.p. 46–47 °C; <sup>1</sup>H NMR (500 MHz, CDCl<sub>3</sub>) δ 8.07-8.04 (m, 2H), 7.07-7.04 (m, 2H), 7.02 (t, *J* = 53.0 Hz, 1H), 3.90 (s, 3H). <sup>13</sup>C NMR (125 MHz, CDCl<sub>3</sub>) δ 161.1, 159.9 (t, *J* = 27.5 Hz), 129.8, 121.7, 114.8, 107.8 (t, *J* = 237.5 Hz), 55.7. <sup>19</sup>F NMR (471 MHz, CDCl<sub>3</sub>) δ -116.97 (d, *J* = 51.8 Hz). HRMS (ESI) *m/z* calcd. for C<sub>9</sub>H<sub>8</sub>F<sub>2</sub>N<sub>4</sub>ONa [M+Na]<sup>+</sup> 249.0645, found 249.0651.

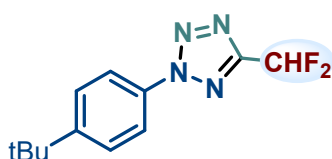

(24) White solid, m.p. 66–67 °C; <sup>1</sup>H NMR (500 MHz, CDCl<sub>3</sub>) δ 8.07-8.04 (m, 2H), 7.60-7.58 (m, 2H), 7.03 (t, *J* = 53.0 Hz, 1H), 1.38 (s, 9H). <sup>13</sup>C NMR (150 MHz, CDCl<sub>3</sub>) δ 160.1 (t, *J* = 27.0 Hz), 154.2, 134.0, 126.7, 119.8, 107.8 (t, *J* = 237.0 Hz), 35.0, 31.2. <sup>19</sup>F NMR (565 MHz, CDCl<sub>3</sub>) δ -117.02 (d, *J* = 53.1 Hz). HRMS (ESI) *m/z* calcd. for C<sub>12</sub>H<sub>14</sub>F<sub>2</sub>N<sub>4</sub>Na [M+Na]<sup>+</sup> 275.1174, found 275.1172.

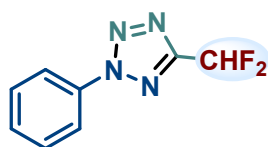

(25) Colorless oil; <sup>1</sup>H NMR (600 MHz, CDCl<sub>3</sub>) δ 8.15-8.13 (m, 2H), 7.59-7.53 (m, 3H), 7.04 (t, *J* = 52.8 Hz, 1H). <sup>13</sup>C NMR (125 MHz, CDCl<sub>3</sub>) δ 160.2 (t, *J* = 28.8 Hz), 136.3, 130.5, 129.8, 120.1, 107.7 (t, *J* = 237.5 Hz). <sup>19</sup>F NMR (471 MHz, CDCl<sub>3</sub>) δ -117.11 (d, *J* = 53.2 Hz). HRMS (ESI) *m/z* calcd. for C<sub>8</sub>H<sub>6</sub>F<sub>2</sub>N<sub>4</sub>Na [M+Na]<sup>+</sup> 219.0573, found 219.0571.

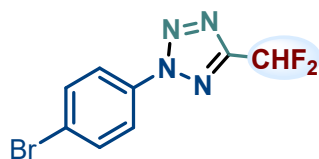

(26) Yellow solid, m.p. 53–55 °C; <sup>1</sup>H NMR (500 MHz, CDCl<sub>3</sub>) δ 8.07-8.04 (m, 2H), 7.75-7.72 (m, 2H), 7.04 (t, *J* = 52.5 Hz, 1H). <sup>13</sup>C NMR (125 MHz, CDCl<sub>3</sub>) δ 160.4 (t, *J* = 27.5 Hz), 135.2, 133.1,

124.7, 121.5, 107.6 (t,  $J = 238.8$  Hz).  $^{19}\text{F}$  NMR (471 MHz,  $\text{CDCl}_3$ )  $\delta$  -117.18 (d,  $J = 52.8$  Hz). HRMS (ESI)  $m/z$  calcd. for  $\text{C}_8\text{H}_5\text{BrF}_2\text{N}_4\text{Na}$   $[\text{M}+\text{Na}]^+$  296.9646, found 296.9651.

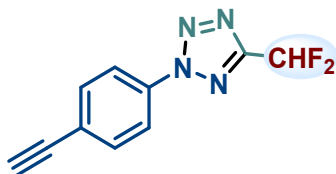

(27) White solid, m.p. 83–84 °C;  $^1\text{H}$  NMR (500 MHz,  $\text{CDCl}_3$ )  $\delta$  8.14-8.13 (m, 2H), 7.70-7.68 (m, 2H), 7.04 (t,  $J = 53.0$  Hz, 1H), 3.25 (s, 1H).  $^{13}\text{C}$  NMR (150 MHz,  $\text{CDCl}_3$ )  $\delta$  160.3 (t,  $J = 28.5$  Hz), 136.0, 133.6, 124.7, 120.0, 107.6 (t,  $J = 238.5$  Hz), 81.9, 80.1.  $^{19}\text{F}$  NMR (565 MHz,  $\text{CDCl}_3$ )  $\delta$  -117.19 (d,  $J = 52.5$  Hz). HRMS (ESI)  $m/z$  calcd. For  $\text{C}_{10}\text{H}_6\text{F}_2\text{N}_4\text{Na}$   $[\text{M}+\text{Na}]^+$  243.0573, found 243.0575.

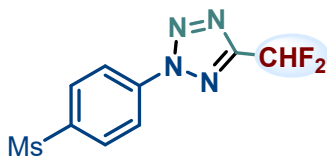

(28) Yellow solid, m.p. 135–136 °C  $^1\text{H}$  NMR (500 MHz, DMSO)  $\delta$  8.42-8.40 (m, 2H), 8.26-8.24 (m, 2H), 7.65 (t,  $J = 52.0$  Hz, 1H), 3.35 (s, 3H).  $^{13}\text{C}$  NMR (150 MHz, DMSO)  $\delta$  164.7 (t,  $J = 27.0$  Hz), 146.9, 143.4, 133.8, 125.7, 112.6 (t,  $J = 235.5$  Hz), 47.8.  $^{19}\text{F}$  NMR (565 MHz, DMSO)  $\delta$  -118.21 (d,  $J = 52.5$  Hz). HRMS (ESI)  $m/z$  calcd. for  $\text{C}_9\text{H}_8\text{F}_2\text{N}_4\text{O}_2\text{SNa}$   $[\text{M}+\text{Na}]^+$  297.0315, found 297.0318.

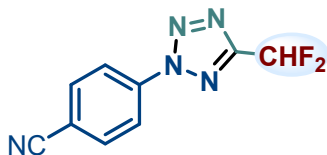

(29) Yellow oil;  $^1\text{H}$  NMR (500 MHz,  $\text{CDCl}_3$ )  $\delta$  8.35-8.33 (m, 2H), 7.93-7.91 (m, 2H), 7.05 (t,  $J = 53.0$  Hz, 1H).  $^{13}\text{C}$  NMR (125 MHz,  $\text{CDCl}_3$ )  $\delta$  160.7 (t,  $J = 28.8$  Hz), 138.8, 134.0, 120.7, 117.3, 114.5, 107.4 (t,  $J = 238.8$  Hz).  $^{19}\text{F}$  NMR (471 MHz,  $\text{CDCl}_3$ )  $\delta$  -117.37 (d,  $J = 52.8$  Hz). HRMS (ESI)  $m/z$  calcd. for  $\text{C}_9\text{H}_5\text{F}_2\text{N}_5\text{Na}$   $[\text{M}+\text{Na}]^+$  244.0537, found 244.0541.

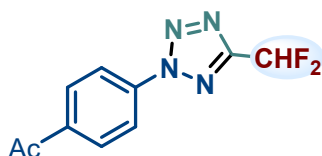

(30) White solid, m.p. 106–107 °C;  $^1\text{H NMR}$  (500 MHz,  $\text{CDCl}_3$ )  $\delta$  8.28–8.26 (m, 2H), 8.18–8.16 (m, 2H), 7.04 (t,  $J = 53.0$  Hz, 1H), 2.67 (s, 3H).  $^{13}\text{C NMR}$  (125 MHz,  $\text{CDCl}_3$ )  $\delta$  196.3, 160.5 (t,  $J = 27.5$  Hz), 139.0, 138.3, 130.0, 120.1, 107.5 (t,  $J = 238.8$  Hz), 26.7.  $^{19}\text{F NMR}$  (471 MHz,  $\text{CDCl}_3$ )  $\delta$  -117.29 (d,  $J = 52.8$  Hz). HRMS (ESI)  $m/z$  calcd. for  $\text{C}_{10}\text{H}_8\text{F}_2\text{N}_4\text{ONa}$   $[\text{M}+\text{Na}]^+$  261.0655, found 261.0658.

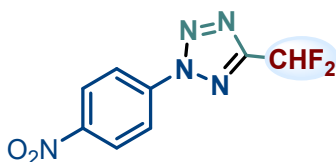

(31) White solid, m.p. 77–79 °C;  $^1\text{H NMR}$  (500 MHz,  $\text{CDCl}_3$ )  $\delta$  8.50–8.47 (m, 2H), 8.42–8.39 (m, 2H), 7.06 (t,  $J = 53.0$  Hz, 1H).  $^{13}\text{C NMR}$  (125 MHz,  $\text{CDCl}_3$ )  $\delta$  160.9 (t,  $J = 28.8$  Hz), 148.5, 140.0, 125.6, 120.8, 107.4 (t,  $J = 238.8$  Hz).  $^{19}\text{F NMR}$  (471 MHz,  $\text{CDCl}_3$ )  $\delta$  -117.44 (d,  $J = 52.3$  Hz). HRMS (ESI)  $m/z$  calcd. for  $\text{C}_8\text{H}_5\text{F}_2\text{N}_5\text{O}_2\text{Na}$   $[\text{M}+\text{Na}]^+$  264.0435, found 264.0433.

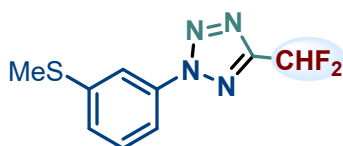

(32) Yellow solid, m.p. 53–54 °C;  $^1\text{H NMR}$  (500 MHz,  $\text{CDCl}_3$ )  $\delta$  7.99 (s, 1H), 7.90 (dd,  $J = 8.0$  Hz,  $J = 1.0$  Hz, 1H), 7.47 (t,  $J = 8.0$  Hz, 1H), 7.39 (d,  $J = 8.0$  Hz, 1H), 7.03 (t,  $J = 53.0$  Hz, 1H), 2.57 (s, 3H).  $^{13}\text{C NMR}$  (150 MHz,  $\text{CDCl}_3$ )  $\delta$  160.2 (t,  $J = 28.5$  Hz), 141.9, 136.8, 130.0, 128.0, 117.1, 116.3, 107.7 (t,  $J = 237.0$  Hz), 15.4.  $^{19}\text{F NMR}$  (565 MHz,  $\text{CDCl}_3$ )  $\delta$  -117.12 (d,  $J = 54.2$  Hz). HRMS (ESI)  $m/z$  calcd. for  $\text{C}_9\text{H}_8\text{F}_2\text{N}_4\text{SNa}$   $[\text{M}+\text{Na}]^+$  265.0417, found 265.0411.

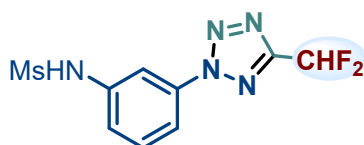

(33) Yellow solid, m.p. 149–151 °C;  $^1\text{H NMR}$  (500 MHz, DMSO)  $\delta$  10.30 (s, 1H), 8.00 (s, 1H),

7.85 (dd,  $J = 8.0$  Hz,  $J = 1.0$  Hz, 1H), 7.65 (t,  $J = 8.0$  Hz, 1H), 7.61 (t,  $J = 52.5$  Hz, 1H), 7.45 (dd,  $J = 8.0$  Hz,  $J = 1.5$  Hz, 1H), 3.11 (s, 3H).  $^{13}\text{C}$  NMR (125 MHz, DMSO)  $\delta$  164.4 (t,  $J = 28.8$  Hz), 144.6, 141.0, 135.8, 125.4, 119.5, 114.8, 112.7 (t,  $J = 236.3$  Hz).  $^{19}\text{F}$  NMR (471 MHz, DMSO)  $\delta$  -113.24 (d,  $J = 51.3$  Hz). HRMS (ESI)  $m/z$  calcd. for  $\text{C}_9\text{H}_9\text{F}_2\text{N}_5\text{O}_2\text{SNa}$   $[\text{M}+\text{Na}]^+$  312.0473, found 312.0477.

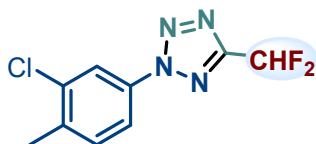

**(34)** White solid, m.p. 83–85 °C;  $^1\text{H}$  NMR (500 MHz,  $\text{CDCl}_3$ )  $\delta$  8.15 (s, 1H), 7.95 (dd,  $J = 8.0$  Hz,  $J = 1.5$  Hz, 1H), 7.44 (d,  $J = 8.5$  Hz, 1H), 7.02 (t,  $J = 52.5$  Hz, 1H), 2.45 (s, 1H).  $^{13}\text{C}$  NMR (125 MHz,  $\text{CDCl}_3$ )  $\delta$  160.2 (t,  $J = 27.5$  Hz), 139.1, 135.6, 134.9, 131.9, 120.7, 118.1, 107.6 (t,  $J = 237.5$  Hz), 19.9.  $^{19}\text{F}$  NMR (471 MHz,  $\text{CDCl}_3$ )  $\delta$  -117.19 (d,  $J = 53.2$  Hz). HRMS (ESI)  $m/z$  calcd. for  $\text{C}_9\text{H}_7\text{ClF}_2\text{N}_4\text{Na}$   $[\text{M}+\text{Na}]^+$  267.0349, found 267.0352.

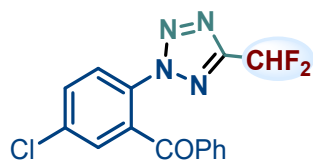

**(35)** White solid, m.p. 95–97 °C;  $^1\text{H}$  NMR (500 MHz,  $\text{CDCl}_3$ )  $\delta$  7.96 (d,  $J = 8.5$  Hz, 1H), 7.74 (dd,  $J = 8.5$  Hz,  $J = 2.5$  Hz, 1H), 7.68–7.64 (m, 3H), 7.53 (t,  $J = 7.5$  Hz, 1H), 7.37 (t,  $J = 7.5$  Hz, 2H), 6.77 (t,  $J = 52.5$  Hz, 1H).  $^{13}\text{C}$  NMR (125 MHz,  $\text{CDCl}_3$ )  $\delta$  192.0, 160.2 (t,  $J = 28.8$  Hz), 137.3, 135.6, 135.1, 133.9, 132.4, 131.7, 130.2, 129.1, 128.7, 125.1, 107.1 (t,  $J = 238.8$  Hz).  $^{19}\text{F}$  NMR (471 MHz,  $\text{CDCl}_3$ )  $\delta$  -117.53 (d,  $J = 53.2$  Hz). HRMS (ESI)  $m/z$  calcd. for  $\text{C}_{15}\text{H}_9\text{ClF}_2\text{N}_4\text{ONa}$   $[\text{M}+\text{Na}]^+$  357.0742, found 357.0742.

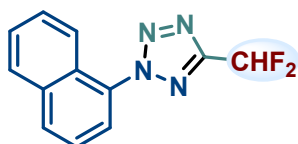

**(36)** White solid, m.p. 46–47 °C;  $^1\text{H}$  NMR (500 MHz,  $\text{CDCl}_3$ )  $\delta$  8.11 (d,  $J = 8.0$  Hz, 1H), 8.01–7.94 (m, 2H), 7.87 (d,  $J = 7.5$  Hz, 1H), 7.64–7.61 (m, 3H), 7.14 (t,  $J = 53.0$  Hz, 1H).  $^{13}\text{C}$  NMR (125 MHz,  $\text{CDCl}_3$ )  $\delta$  160.2 (t,  $J = 28.8$  Hz), 134.2, 132.9, 131.9, 128.5, 127.3, 126.8, 124.8, 123.6,



122.2, 107.8 (t,  $J = 237.5$  Hz).  $^{19}\text{F}$  NMR (471 MHz,  $\text{CDCl}_3$ )  $\delta$  -116.88 (d,  $J = 52.8$  Hz). HRMS (ESI)  $m/z$  calcd. for  $\text{C}_{12}\text{H}_8\text{F}_2\text{N}_4\text{Na}$   $[\text{M}+\text{Na}]^+$  269.0239, found 269.0236.

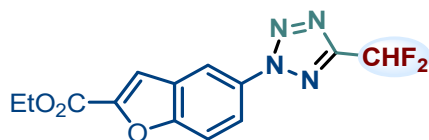

(37) White solid, m.p. 104–105 °C;  $^1\text{H}$  NMR (500 MHz,  $\text{CDCl}_3$ )  $\delta$  8.48 (s, 1H), 8.27 (dd,  $J = 9.0$  Hz,  $J = 1.5$  Hz, 1H), 7.79 (d,  $J = 9.0$  Hz, 1H), 7.62 (s, 1H), 7.05 (t,  $J = 53.0$  Hz, 1H), 4.48 (q,  $J = 7.0$  Hz, 2H), 1.45 (t,  $J = 7.0$  Hz, 3H).  $^{13}\text{C}$  NMR (150 MHz,  $\text{CDCl}_3$ )  $\delta$  160.3 (t,  $J = 28.5$  Hz), 158.8, 155.8, 148.1, 132.8, 127.8, 119.8, 114.8, 113.8, 113.6, 107.6 (t,  $J = 238.5$  Hz), 62.0, 14.3.  $^{19}\text{F}$  NMR (565 MHz,  $\text{CDCl}_3$ )  $\delta$  -117.12 (d,  $J = 53.1$  Hz). HRMS (ESI)  $m/z$  calcd. for  $\text{C}_{13}\text{H}_{10}\text{F}_2\text{N}_4\text{O}_3\text{Na}$   $[\text{M}+\text{Na}]^+$  331.0535, found 331.0533.

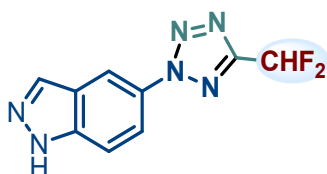

(38) White solid, m.p. 124–125 °C;  $^1\text{H}$  NMR (600 MHz, DMSO)  $\delta$  13.54 (s, 1H), 8.56 (s, 1H), 8.32 (s, 1H), 8.08 (dd,  $J = 9.0$  Hz,  $J = 1.8$  Hz, 1H), 7.84 (d,  $J = 9.0$  Hz, 1H), 7.61 (t,  $J = 52.2$  Hz, 1H).  $^{13}\text{C}$  NMR (150 MHz, DMSO)  $\delta$  164.4 (t,  $J = 27.0$  Hz), 144.5, 139.6, 133.9, 127.0, 123.4, 117.9, 116.3, 112.8 (t,  $J = 235.5$  Hz).  $^{19}\text{F}$  NMR (565 MHz, DMSO)  $\delta$  -117.78 (d,  $J = 53.1$  Hz). HRMS (ESI)  $m/z$  calcd. for  $\text{C}_9\text{H}_6\text{F}_2\text{N}_6\text{Na}$   $[\text{M}+\text{Na}]^+$  259.0648, found 259.0651.

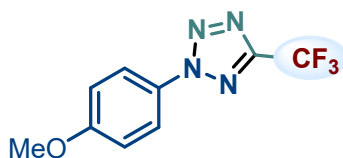

(39)<sup>[2]</sup> Yellow solid, m.p. 49–50 °C;  $^1\text{H}$  NMR (500 MHz,  $\text{CDCl}_3$ )  $\delta$  8.08–8.06 (m, 2H), 7.08–7.06 (m, 2H), 3.90 (s, 3H).  $^{13}\text{C}$  NMR (150 MHz,  $\text{CDCl}_3$ )  $\delta$  161.0, 157.1 (q,  $J = 40.5$  Hz), 121.8, 119.4 (d,  $J = 268.5$  Hz), 114.9, 55.7.  $^{19}\text{F}$  NMR (471 MHz,  $\text{CDCl}_3$ )  $\delta$  -63.56 (s). HRMS (ESI)  $m/z$  calcd. for  $\text{C}_9\text{H}_8\text{F}_3\text{N}_4\text{O}$   $[\text{M}+\text{H}]^+$  245.0645, found 245.0643.

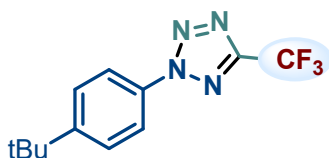

(40)<sup>[2]</sup> Yellow solid, m.p. 44–45 °C; <sup>1</sup>H NMR (500 MHz, CDCl<sub>3</sub>) δ 8.08-8.05 (m, 2H), 7.62-7.59 (m, 2H), 1.39 (s, 9H). <sup>13</sup>C NMR (125 MHz, CDCl<sub>3</sub>) δ 157.3 (q, *J* = 40.6 Hz), 154.6, 133.8, 126.8, 119.9, 119.6 (q, *J* = 273.8 Hz), 35.0, 31.1. <sup>19</sup>F NMR (471 MHz, CDCl<sub>3</sub>) δ -63.58 (s). HRMS (ESI) *m/z* calcd. for C<sub>12</sub>H<sub>13</sub>F<sub>3</sub>N<sub>4</sub> [M]<sup>+</sup> 270.1087, found 270.1093.

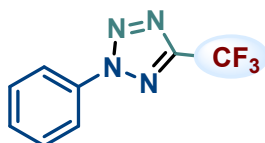

(41)<sup>[2]</sup> Yellow oil; <sup>1</sup>H NMR (500 MHz, CDCl<sub>3</sub>) δ 8.17-8.15 (m, 2H), 7.63-7.56 (m, 3H). <sup>13</sup>C NMR (125 MHz, CDCl<sub>3</sub>) δ 157.4 (q, *J* = 33.8 Hz), 136.2, 130.9, 130.0, 120.2, 119.4 (q, *J* = 223.8 Hz). <sup>19</sup>F NMR (565 MHz, CDCl<sub>3</sub>) δ -63.65 (s). HRMS (ESI) *m/z* calcd. for C<sub>8</sub>H<sub>6</sub>F<sub>3</sub>N<sub>4</sub> [M+H]<sup>+</sup> 215.0539, found 215.0541.

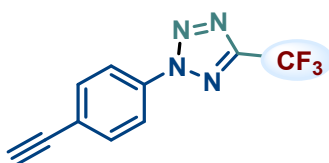

(42) White solid, m.p. 63–65 °C; <sup>1</sup>H NMR (500 MHz, CDCl<sub>3</sub>) δ 8.16-8.14 (m, 2H), 7.72-7.69 (m, 2H), 3.27 (s, 1H). <sup>13</sup>C NMR (125 MHz, CDCl<sub>3</sub>) δ 157.4 (q, *J* = 41.3 Hz), 135.7, 133.7, 125.1, 120.1, 118.3 (q, *J* = 270.0 Hz), 81.8, 80.4. <sup>19</sup>F NMR (471 MHz, CDCl<sub>3</sub>) δ -63.64 (s). HRMS (ESI) *m/z* calcd. for C<sub>10</sub>H<sub>5</sub>F<sub>3</sub>N<sub>4</sub>Na [M+Na]<sup>+</sup> 261.0573, found 261.0572.

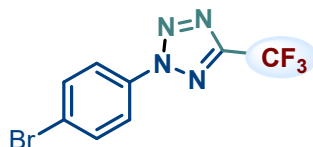

(43)<sup>[2]</sup> Yellow solid, m.p. 36–37 °C; <sup>1</sup>H NMR (500 MHz, CDCl<sub>3</sub>) δ 8.15-8.12 (m, 2H), 7.61-7.58 (m, 2H). <sup>13</sup>C NMR (150 MHz, CDCl<sub>3</sub>) δ 157.4 (q, *J* = 35.0 Hz), 135.1, 133.2, 125.1, 121.6, 119.2 (q, *J* = 223.8 Hz). <sup>19</sup>F NMR (565 MHz, CDCl<sub>3</sub>) δ -63.62 (s). HRMS (ESI) *m/z* calcd. for

$C_8H_4BrF_3N_4$   $[M]^+$  291.9566, found 291.9569.

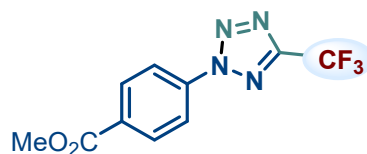

(44)<sup>[2]</sup> White solid, m.p. 52–54 °C;  $^1H$  NMR (500 MHz,  $CDCl_3$ )  $\delta$  8.30-8.26 (m, 4H), 4.00 (s, 3H).  $^{13}C$  NMR (125 MHz,  $CDCl_3$ )  $\delta$  165.4, 157.6 (q,  $J = 41.3$  Hz), 138.8, 132.4, 131.4, 120.0, 119.3 (q,  $J = 268.8$  Hz), 52.6.  $^{19}F$  NMR (471 MHz,  $CDCl_3$ )  $\delta$  -63.70 (s). HRMS (ESI) m/z calcd. for  $C_{10}H_7F_3N_4O_2$   $[M]^+$  272.0516, found 272.0518.

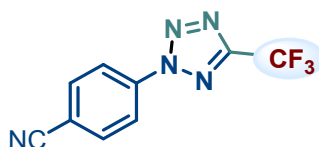

(45)<sup>[2]</sup> Yellow oil;  $^1H$  NMR (500 MHz,  $CDCl_3$ )  $\delta$  8.36-8.35 (m, 2H), 7.96-7.94 (m, 2H).  $^{13}C$  NMR (150 MHz,  $CDCl_3$ )  $\delta$  157.9 (q,  $J = 40.5$  Hz), 138.5, 134.1, 120.8, 119.0 (q,  $J = 268.5$  Hz), 117.1, 114.8.  $^{19}F$  NMR (565 MHz,  $CDCl_3$ )  $\delta$  -63.71 (s). HRMS (ESI) m/z calcd. for  $C_9H_4F_3N_3$   $[M-N_2]^+$  211.0352, found 211.0354.

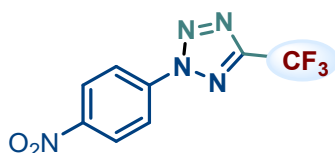

(46)<sup>[2]</sup> White solid, m.p. 53–55 °C;  $^1H$  NMR (500 MHz,  $CDCl_3$ )  $\delta$  8.52-8.49 (m, 2H), 8.45-8.42 (m, 2H).  $^{13}C$  NMR (125 MHz,  $CDCl_3$ )  $\delta$  158.1 (q,  $J = 41.3$  Hz), 148.8, 139.8, 125.6, 121.0, 119.2 (q,  $J = 268.8$  Hz).  $^{19}F$  NMR (471 MHz,  $CDCl_3$ )  $\delta$  -63.71 (s). HRMS (ESI) m/z calcd. for  $C_8H_4F_3N_3O_2$   $[M-N_2]^+$  231.0251, found 231.0250.

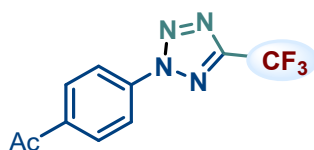

(47)<sup>[2]</sup> White solid, m.p. 146–148 °C;  $^1H$  NMR (500 MHz, DMSO)  $\delta$  8.30-8.24 (m, 4H), 2.68 (s,

3H).  $^{13}\text{C}$  NMR (150 MHz, DMSO)  $\delta$  197.4, 156.7 (q,  $J = 33.8$  Hz), 138.9, 138.8, 130.7, 121.3, 119.8 (q,  $J = 223.8$  Hz), 27.4.  $^{19}\text{F}$  NMR (565 MHz, DMSO)  $\delta$  -62.73 (s). HRMS (ESI)  $m/z$  calcd. for  $\text{C}_{10}\text{H}_7\text{F}_3\text{N}_4\text{O}$   $[\text{M}]^+$  256.0567, found 256.0568.

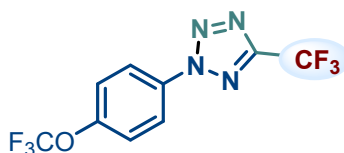

(48)<sup>[3]</sup> Red oil;  $^1\text{H}$  NMR (500 MHz,  $\text{CDCl}_3$ )  $\delta$  8.26-8.23 (m, 2H), 7.47 (d,  $J = 8.5$  Hz, 2H).  $^{13}\text{C}$  NMR (150 MHz,  $\text{CDCl}_3$ )  $\delta$  157.6 (q,  $J = 42.0$  Hz), 150.7, 134.3, 122.3, 121.9, 121.2 (q,  $J = 213.8$  Hz), 119.2 (q,  $J = 268.5$  Hz).  $^{19}\text{F}$  NMR (565 MHz,  $\text{CDCl}_3$ )  $\delta$  -58.00 (s), -63.71 (s). HRMS (ESI)  $m/z$  calcd. for  $\text{C}_{12}\text{H}_{13}\text{F}_3\text{N}_4\text{O}$   $[\text{M}+\text{H}]^+$  299.0362, found 299.0366.

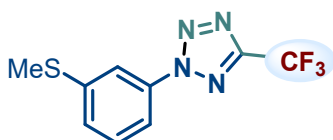

(49) Yellow solid, m.p. 60–62 °C;  $^1\text{H}$  NMR (500 MHz,  $\text{CDCl}_3$ )  $\delta$  8.00 (s, 1H), 7.90 (d,  $J = 7.5$  Hz, 1H), 7.51 (t,  $J = 8.0$  Hz, 1H), 7.72 (d,  $J = 8.0$  Hz, 1H), 2.60 (s, 3H).  $^{13}\text{C}$  NMR (150 MHz,  $\text{CDCl}_3$ )  $\delta$  157.3 (q,  $J = 40.5$  Hz), 142.1, 136.6, 130.0, 128.2, 119.3 (q,  $J = 270.0$  Hz), 117.1, 116.3, 15.4.  $^{19}\text{F}$  NMR (565 MHz,  $\text{CDCl}_3$ )  $\delta$  -63.60 (s). HRMS (ESI)  $m/z$  calcd. for  $\text{C}_9\text{H}_7\text{F}_3\text{N}_4\text{SNa}$   $[\text{M}+\text{Na}]^+$  283.0357, found 283.0359.

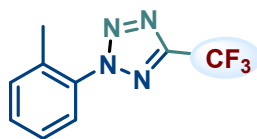

(50)<sup>[2]</sup> Yellow oil;  $^1\text{H}$  NMR (500 MHz,  $\text{CDCl}_3$ )  $\delta$  7.63 (d,  $J = 8.0$  Hz, 1H), 7.53 (t,  $J = 7.5$  Hz, 1H), 7.45-7.40 (m, 2H), 2.39 (s, 3H).  $^{13}\text{C}$  NMR (125 MHz,  $\text{CDCl}_3$ )  $\delta$  157.2 (q,  $J = 40.0$  Hz), 135.7, 133.1, 132.1, 131.2, 127.1, 125.3, 119.6 (q,  $J = 268.8$  Hz), 18.6.  $^{19}\text{F}$  NMR (565 MHz,  $\text{CDCl}_3$ )  $\delta$  -63.48 (s). HRMS (ESI)  $m/z$  calcd. for  $\text{C}_9\text{H}_8\text{F}_3\text{N}_4$   $[\text{M}+\text{H}]^+$  229.0696, found 229.0702.

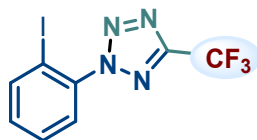

**(51)**<sup>[2]</sup> Red solid, m.p. 39–41 °C; <sup>1</sup>H NMR (500 MHz, CDCl<sub>3</sub>) δ 8.08-8.07 (m, 1H), 7.61-7.54 (m, 2H), 7.38-7.35 (m, 1H). <sup>13</sup>C NMR (125 MHz, CDCl<sub>3</sub>) δ 157.5 (q, *J* = 37.5 Hz), 140.8, 139.3, 132.9, 129.3, 127.6, 118.4 (q, *J* = 268.8 Hz), 92.3. <sup>19</sup>F NMR (565 MHz, CDCl<sub>3</sub>) δ -63.42 (s). HRMS (ESI) *m/z* calcd. for C<sub>8</sub>H<sub>4</sub>IF<sub>3</sub>N<sub>4</sub> [M]<sup>+</sup> 339.9428, found 339.9435.

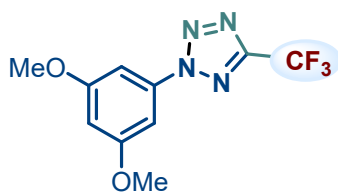

**(52)**<sup>[3]</sup> White solid, m.p. 87–89 °C; <sup>1</sup>H NMR (500 MHz, CDCl<sub>3</sub>) δ 7.27 (d, *J* = 2.0 Hz, 2H), 6.58 (t, *J* = 2.5 Hz, 1H), 3.87 (s, 6H). <sup>13</sup>C NMR (150 MHz, CDCl<sub>3</sub>) δ 161.6, 157.0 (q, *J* = 40.5 Hz), 137.4, 119.3 (q, *J* = 268.5 Hz), 102.9, 98.4, 55.8. <sup>19</sup>F NMR (565 MHz, CDCl<sub>3</sub>) δ -63.67 (s). HRMS (ESI) *m/z* calcd. for C<sub>10</sub>H<sub>10</sub>F<sub>3</sub>N<sub>4</sub>O<sub>2</sub> [M+H]<sup>+</sup> 275.0750, found 275.0750.

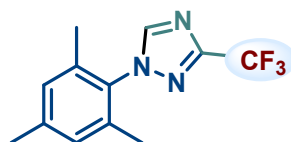

**(53)**<sup>[3]</sup> Red oil; <sup>1</sup>H NMR (500 MHz, CDCl<sub>3</sub>) δ 7.03 (s, 2H), 2.37 (s, 3H), 1.94 (s, 9H). <sup>13</sup>C NMR (125 MHz, CDCl<sub>3</sub>) δ 157.3 (q, *J* = 40.0 Hz), 141.8, 134.8, 133.0, 129.4, 119.6 (q, *J* = 268.8 Hz), 21.2, 17.2. <sup>19</sup>F NMR (471 MHz, CDCl<sub>3</sub>) δ -63.47 (s). HRMS (ESI) *m/z* calcd. for C<sub>11</sub>H<sub>12</sub>F<sub>3</sub>N<sub>4</sub> [M+H]<sup>+</sup> 257.1008, found 257.1009.

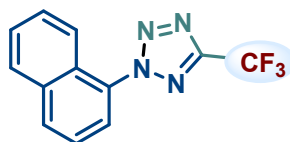

**(54)**<sup>[2]</sup> White solid, m.p. 44–45 °C; <sup>1</sup>H NMR (500 MHz, CDCl<sub>3</sub>) δ 8.11 (d, *J* = 8.5 Hz, 1H), 8.00-7.99 (m, 1H), 7.94-7.92 (m, 1H), 7.86 (d, *J* = 7.5 Hz, 1H), 7.64-7.61 (m, 3H). <sup>13</sup>C NMR (125 MHz, CDCl<sub>3</sub>) δ 157.3 (q, *J* = 41.3 Hz), 134.2, 132.6, 132.2, 128.7, 128.5, 127.4, 126.6, 124.7,

123.7, 122.1, 119.6 (q,  $J = 268.8$  Hz).  $^{19}\text{F}$  NMR (471 MHz,  $\text{CDCl}_3$ )  $\delta$  -63.34 (s). HRMS (ESI)  $m/z$  calcd. for  $\text{C}_{12}\text{H}_7\text{F}_3\text{N}_4$   $[\text{M}]^+$  264.0618, found 264.0618.

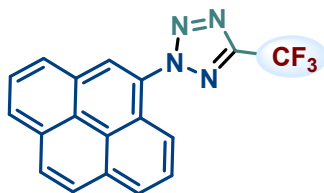

(55) Yellow solid, m.p. 84–86 °C;  $^1\text{H}$  NMR (500 MHz,  $\text{CDCl}_3$ )  $\delta$  8.25 (d,  $J = 8.0$  Hz, 2H), 8.21 (t,  $J = 6.5$  Hz, 2H), 8.15–8.13 (m, 3H), 8.07–8.03 (m, 2H).  $^{13}\text{C}$  NMR (125 MHz,  $\text{CDCl}_3$ )  $\delta$  157.4 (q,  $J = 41.3$  Hz), 133.2, 130.9, 130.5, 130.3, 129.7, 129.0, 126.9, 126.7, 126.5, 124.9, 124.8, 124.6, 123.8, 122.6, 120.5, 118.8 (q,  $J = 268.8$  Hz).  $^{19}\text{F}$  NMR (471 MHz,  $\text{CDCl}_3$ )  $\delta$  -63.23 (s). HRMS (ESI)  $m/z$  calcd. for  $\text{C}_{18}\text{H}_9\text{F}_3\text{N}_4\text{Na}$   $[\text{M}+\text{Na}]^+$  361.0735, found 361.0733.

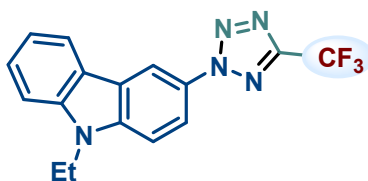

(56) Yellow solid, m.p. 135–137 °C;  $^1\text{H}$  NMR (600 MHz,  $\text{CDCl}_3$ )  $\delta$  8.75–8.73 (m, 1H), 8.19–8.11 (m, 2H), 7.56–7.53 (m, 1H), 7.48–7.43 (m, 2H), 7.32–7.29 (m, 1H), 4.40–4.36 (m, 2H), 1.49–1.46 (m, 3H).  $^{13}\text{C}$  NMR (150 MHz,  $\text{CDCl}_3$ )  $\delta$  157.0 (q,  $J = 40.5$  Hz), 140.8, 140.5, 128.4, 127.1, 123.2, 122.4, 120.9, 119.9, 119.6 (q,  $J = 223.8$  Hz), 112.6, 109.1, 109.0, 37.8, 13.7.  $^{19}\text{F}$  NMR (565 MHz,  $\text{CDCl}_3$ )  $\delta$  -63.41 (s). HRMS (ESI)  $m/z$  calcd. for  $\text{C}_{16}\text{H}_{12}\text{F}_3\text{N}_3\text{Na}$   $[\text{M}+\text{Na}]^+$  354.0341, found 351.0342.

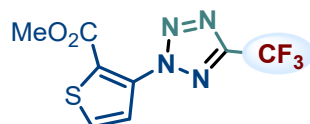

(57)<sup>[2]</sup> Yellow oil;  $^1\text{H}$  NMR (500 MHz,  $\text{CDCl}_3$ )  $\delta$  7.75 (d,  $J = 5.0$  Hz, 1H), 7.39 (d,  $J = 5.5$  Hz, 1H), 3.79 (s, 3H).  $^{13}\text{C}$  NMR (150 MHz,  $\text{CDCl}_3$ )  $\delta$  159.4, 157.0 (q,  $J = 40.5$  Hz), 135.1, 131.2, 128.8, 126.0, 119.2 (q,  $J = 268.5$  Hz), 52.8.  $^{19}\text{F}$  NMR (565 MHz,  $\text{CDCl}_3$ )  $\delta$  -63.52 (s). HRMS (ESI)  $m/z$  calcd. for  $\text{C}_8\text{H}_6\text{F}_3\text{N}_4\text{O}_2\text{S}$   $[\text{M}+\text{H}]^+$  279.0158, found 279.0163.

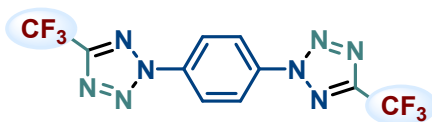

**(58)** White solid, m.p. 71–73 °C;  $^1\text{H NMR}$  (500 MHz,  $\text{CDCl}_3$ )  $\delta$  8.49 (s, 4H).  $^{13}\text{C NMR}$  (150 MHz,  $\text{CDCl}_3$ )  $\delta$  158.0 (q,  $J = 42.0$  Hz), 137.3, 121.9, 119.1 (q,  $J = 268.5$  Hz).  $^{19}\text{F NMR}$  (565 MHz,  $\text{CDCl}_3$ )  $\delta$  -63.70 (s). HRMS (ESI)  $m/z$  calcd. for  $\text{C}_{10}\text{H}_4\text{F}_6\text{N}_8\text{Na}$   $[\text{M}+\text{Na}]^+$  373.0252, found 373.0251.

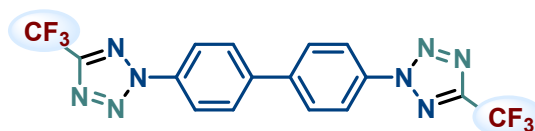

**(59)** White solid, m.p. 94–96 °C;  $^1\text{H NMR}$  (500 MHz,  $\text{CDCl}_3$ )  $\delta$  8.33 (d,  $J = 9.0$  Hz, 4H), 7.89 (d,  $J = 9.0$  Hz, 4H).  $^{13}\text{C NMR}$  (125 MHz,  $\text{CDCl}_3$ )  $\delta$  157.6 (q,  $J = 40.0$  Hz), 141.8, 136.0, 128.7, 120.9, 119.5 (q,  $J = 268.8$  Hz).  $^{19}\text{F NMR}$  (471 MHz,  $\text{CDCl}_3$ )  $\delta$  -63.56 (s). HRMS (ESI)  $m/z$  calcd. for  $\text{C}_{16}\text{H}_8\text{F}_6\text{N}_8\text{Na}$   $[\text{M}+\text{Na}]^+$  449.0766, found 449.0771.

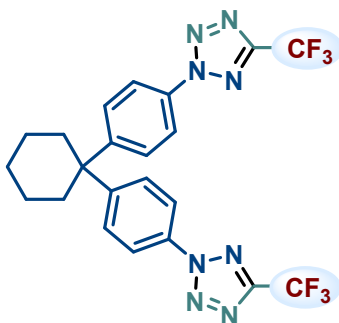

**(60)** White solid, m.p. 111–113 °C;  $^1\text{H NMR}$  (500 MHz,  $\text{CDCl}_3$ )  $\delta$  8.10 (d,  $J = 9.0$  Hz, 4H), 7.54 (d,  $J = 9.0$  Hz, 4H), 2.40–2.38 (m, 4H), 1.66–1.57 (m, 6H).  $^{13}\text{C NMR}$  (125 MHz,  $\text{CDCl}_3$ )  $\delta$  157.4 (q,  $J = 40.0$  Hz), 151.0, 134.1, 128.7, 120.4, 119.5 (q,  $J = 268.8$  Hz), 46.6, 37.0, 26.0, 22.7.  $^{19}\text{F NMR}$  (565 MHz,  $\text{CDCl}_3$ )  $\delta$  -63.58 (s). HRMS (ESI)  $m/z$  calcd. for  $\text{C}_{22}\text{H}_{18}\text{F}_6\text{N}_8\text{Na}$   $[\text{M}+\text{Na}]^+$  531.1578, found 531.1577.

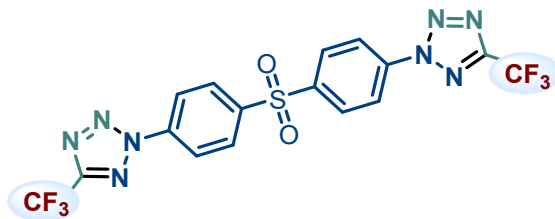

(61) Yellow solid; mp: 138-139 °C;  $^1\text{H NMR}$  (600 MHz, DMSO)  $\delta$  8.44-8.42 (m, 4H), 8.39-8.36 (m, 4H).  $^{13}\text{C NMR}$  (125 MHz, DMSO)  $\delta$  156.7 (q,  $J = 40.0$  Hz), 142.6, 139.6, 130.5, 122.7, 119.1 (q,  $J = 267.5$  Hz).  $^{19}\text{F NMR}$  (565 MHz, DMSO)  $\delta$  -62.81 (s). HRMS (ESI)  $m/z$  calcd. for  $\text{C}_{16}\text{H}_8\text{F}_6\text{N}_8\text{O}_2\text{SNa}$   $[\text{M}+\text{Na}]^+$  513.0383, found 513.0388.

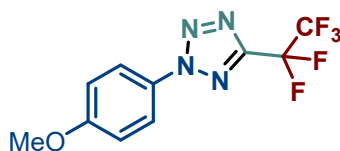

(62) Colorless oil;  $^1\text{H NMR}$  (500 MHz,  $\text{CDCl}_3$ )  $\delta$  8.08-8.06 (m, 2H), 7.08-7.05 (m, 2H), 3.90 (s, 3H).  $^{13}\text{C NMR}$  (125 MHz,  $\text{CDCl}_3$ )  $\delta$  161.5, 156.2 (t,  $J = 28.8$  Hz), 129.6, 121.8, 119.3 (qt,  $J = 285.0, 36.3$  Hz), 108.8 (tq,  $J = 252.0, 40.5$  Hz), 55.7.  $^{19}\text{F NMR}$  (471 MHz,  $\text{CDCl}_3$ )  $\delta$  -83.99 (s), -114.68 (s). HRMS (ESI)  $m/z$  calcd. for  $\text{C}_{10}\text{H}_7\text{F}_5\text{N}_4\text{ONa}$   $[\text{M}+\text{Na}]^+$  317.0118, found 317.0119.

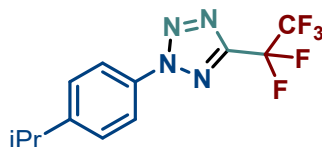

(63) Yellow oil;  $^1\text{H NMR}$  (500 MHz,  $\text{CDCl}_3$ )  $\delta$  8.07-8.05 (m, 2H), 7.45-7.43 (m, 2H), 3.05-2.99 (m, 1H), 7.75 (d,  $J = 7.0$  Hz, 6H).  $^{13}\text{C NMR}$  (125 MHz,  $\text{CDCl}_3$ )  $\delta$  156.4 (t,  $J = 28.8$  Hz), 152.4, 134.1, 127.9, 120.3, 119.4 (qt,  $J = 285.0, 35.0$  Hz), 108.8 (tq,  $J = 253.8, 40.0$  Hz), 34.0, 23.7.  $^{19}\text{F NMR}$  (471 MHz,  $\text{CDCl}_3$ )  $\delta$  -84.05 (s), -114.75 (s). HRMS (ESI)  $m/z$  calcd. for  $\text{C}_{12}\text{H}_{11}\text{F}_5\text{N}_4\text{Na}$   $[\text{M}+\text{Na}]^+$  329.0934, found 329.0932.

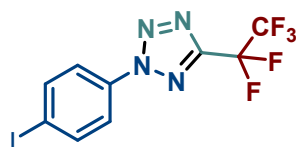

(64) Red oil;  $^1\text{H NMR}$  (500 MHz,  $\text{CDCl}_3$ )  $\delta$  7.97-7.92 (m, 4H).  $^{13}\text{C NMR}$  (150 MHz,  $\text{CDCl}_3$ )  $\delta$



156.7 (t,  $J = 28.5$  Hz), 139.2, 135.7, 121.7, 119.1 (qt,  $J = 285.0, 36.0$  Hz), 108.6 (tq,  $J = 253.5, 40.5$  Hz), 96.7.  $^{19}\text{F}$  NMR (565 MHz,  $\text{CDCl}_3$ )  $\delta$  -83.91 (s), -114.72 (s). HRMS (ESI)  $m/z$  calcd. for  $\text{C}_9\text{H}_4\text{F}_5\text{IN}_4\text{Na}$   $[\text{M}+\text{Na}]^+$  412.9433, found 412.9436.

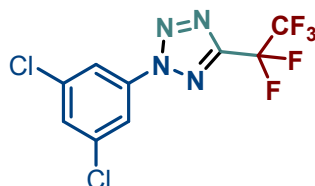

(65) White solid, m.p. 56–57 °C;  $^1\text{H}$  NMR (500 MHz,  $\text{CDCl}_3$ )  $\delta$  7.69 (d,  $J = 2.5$  Hz, 1H), 7.65 (d,  $J = 8.5$  Hz, 1H), 7.52 (dd,  $J = 8.5$  Hz,  $J = 2.0$  Hz, 1H).  $^{13}\text{C}$  NMR (150 MHz,  $\text{CDCl}_3$ )  $\delta$  156.7 (t,  $J = 30.0$  Hz), 138.6, 132.7, 131.3, 130.1, 128.3, 128.3, 119.3 (qt,  $J = 283.8, 35.0$  Hz), 108.6 (tq,  $J = 253.8, 41.3$  Hz).  $^{19}\text{F}$  NMR (471 MHz,  $\text{CDCl}_3$ )  $\delta$  -84.02 (s), -114.70 (s). HRMS (ESI)  $m/z$  calcd. for  $\text{C}_9\text{H}_3\text{Cl}_2\text{F}_5\text{N}_4\text{Na}$   $[\text{M}+\text{Na}]^+$  354.9642, found 354.9646.

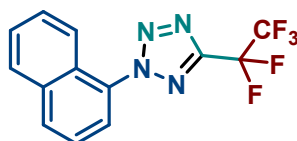

(66) White solid, m.p. 41–42 °C;  $^1\text{H}$  NMR (500 MHz,  $\text{CDCl}_3$ )  $\delta$  8.13 (d,  $J = 8.5$  Hz, 1H), 8.02–7.99 (m, 1H), 7.95–7.90 (m, 1H), 7.90 (dd,  $J = 7.5$  Hz,  $J = 1.5$  Hz, 1H), 7.67–7.63 (m, 3H).  $^{13}\text{C}$  NMR (150 MHz,  $\text{CDCl}_3$ )  $\delta$  156.6 (t,  $J = 30.0$  Hz), 134.2, 132.5, 132.2, 128.7, 128.5, 127.4, 126.6, 124.7, 123.7, 122.0, 119.4 (qt,  $J = 285.0, 35.0$  Hz), 108.8 (tq,  $J = 253.8, 40.0$  Hz).  $^{19}\text{F}$  NMR (565 MHz,  $\text{CDCl}_3$ )  $\delta$  -83.83 (s), -114.43 (s). HRMS (ESI)  $m/z$  calcd. for  $\text{C}_{13}\text{H}_7\text{F}_5\text{N}_4\text{Na}$   $[\text{M}+\text{Na}]^+$  337.0297, found 337.0293.

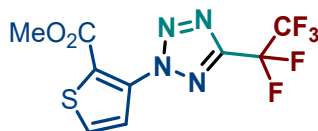

(67) Yellow oil;  $^1\text{H}$  NMR (500 MHz,  $\text{CDCl}_3$ )  $\delta$  7.74 (d,  $J = 5.5$  Hz, 1H), 7.40 (d,  $J = 5.5$  Hz, 1H), 3.77 (s, 3H).  $^{13}\text{C}$  NMR (150 MHz,  $\text{CDCl}_3$ )  $\delta$  159.5, 156.3 (t,  $J = 28.5$  Hz), 135.0, 131.2, 129.2, 126.0, 119.1 (qt,  $J = 283.5, 36.0$  Hz), 108.6 (tq,  $J = 255.0, 40.5$  Hz).  $^{19}\text{F}$  NMR (565 MHz,  $\text{CDCl}_3$ )  $\delta$  -88.79 (s), -119.52 (s). HRMS (ESI)  $m/z$  calcd. for  $\text{C}_9\text{H}_5\text{F}_5\text{N}_4\text{O}_2\text{SNa}$   $[\text{M}+\text{Na}]^+$  351.0071, found

351.0072.

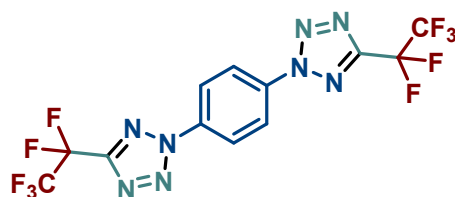

**(68)** White solid; mp: 53–54 °C;  $^1\text{H NMR}$  (500 MHz,  $\text{CDCl}_3$ )  $\delta$  8.50 (s, 4H).  $^{13}\text{C NMR}$  (125 MHz,  $\text{CDCl}_3$ )  $\delta$  157.1 (t,  $J = 30.0$  Hz), 137.3, 121.9, 119.2 (qt,  $J = 285.0, 35.0$  Hz), 108.6 (tq,  $J = 253.8, 41.3$  Hz).  $^{19}\text{F NMR}$  (565 MHz,  $\text{CDCl}_3$ )  $\delta$  -83.86 (s), -114.76 (s). HRMS (ESI)  $m/z$  calcd. for  $\text{C}_{12}\text{H}_4\text{F}_{10}\text{N}_8\text{Na}$   $[\text{M}+\text{Na}]^+$  473.0392, found 473.0390.

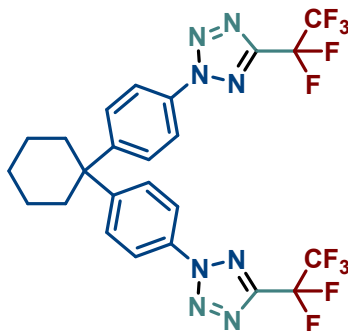

**(69)** White solid, m.p. 92–93 °C;  $^1\text{H NMR}$  (500 MHz,  $\text{CDCl}_3$ )  $\delta$  8.13 (d,  $J = 9.0$  Hz, 4H), 7.58 (d,  $J = 9.0$  Hz, 4H), 2.43–2.41 (m, 4H), 1.68–1.58 (m, 6H).  $^{13}\text{C NMR}$  (150 MHz,  $\text{CDCl}_3$ )  $\delta$  156.5 (t,  $J = 28.5$  Hz), 151.1, 134.0, 128.7, 120.4, 119.1 (qt,  $J = 285.0, 34.5$  Hz), 108.7 (tq,  $J = 253.5, 40.5$  Hz), 46.6, 36.9, 25.9, 22.7.  $^{19}\text{F NMR}$  (565 MHz,  $\text{CDCl}_3$ )  $\delta$  -84.09 (s), -114.82 (s). HRMS (ESI)  $m/z$  calcd. for  $\text{C}_{24}\text{H}_{18}\text{F}_{10}\text{N}_8\text{Na}$   $[\text{M}+\text{Na}]^+$  631.1488, found 631.1485.

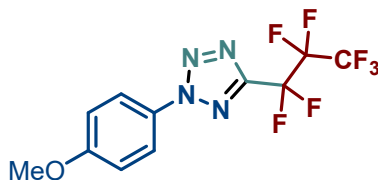

**(70)** Colorless oil;  $^1\text{H NMR}$  (500 MHz,  $\text{CDCl}_3$ )  $\delta$  8.08–8.05 (m, 2H), 7.07–7.04 (m, 2H), 3.89 (s, 3H).  $^{13}\text{C NMR}$  (150 MHz,  $\text{CDCl}_3$ )  $\delta$  161.5, 156.3 (t,  $J = 28.5$  Hz), 129.6, 121.8, 118.6 (qt,  $J = 286.5, 33.0$  Hz), 114.9, 110.6 (tt,  $J = 256.5, 31.5$  Hz), 110.2–106.2 (m), 55.7.  $^{19}\text{F NMR}$  (565 MHz,  $\text{CDCl}_3$ )  $\delta$  -80.16 (t,  $J = 7.9$  Hz), (-112.53)–(-112.58) (m), -126.66 (s). HRMS (ESI)  $m/z$  calcd. for

C<sub>11</sub>H<sub>7</sub>F<sub>7</sub>N<sub>4</sub>ONa [M+Na]<sup>+</sup> 367.0546, found 367.0549.

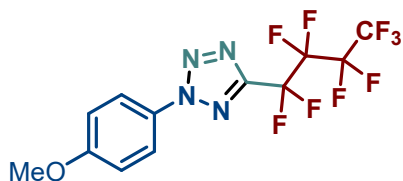

(71) Colorless oil; <sup>1</sup>H NMR (500 MHz, CDCl<sub>3</sub>) δ 8.10-8.07 (m, 2H), 7.09-7.05 (m, 2H), 3.90 (s, 3H). <sup>13</sup>C NMR (150 MHz, CDCl<sub>3</sub>) δ 161.6, 156.5 (t, *J* = 28.5 Hz), 129.6, 121.8, 118.3 (qt, *J* = 286.5, 33.0 Hz), 114.9, 110.2 (tt, *J* = 256.5, 33.0 Hz), 109.8-106.6 (m), 55.6. <sup>19</sup>F NMR (565 MHz, CDCl<sub>3</sub>) δ (-80.97)-(-81.01) (m), (-111.80)-(-111.84) (m), (-123.07)-(-113.12) (m), (-125.65)-(-125.68) (m). HRMS (ESI) *m/z* calcd. for C<sub>12</sub>H<sub>7</sub>F<sub>9</sub>N<sub>4</sub>ONa [M+Na]<sup>+</sup> 417.0489, found 417.0488.

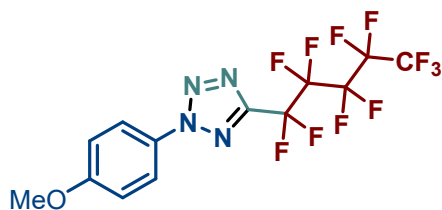

(72) Colorless oil; <sup>1</sup>H NMR (500 MHz, CDCl<sub>3</sub>) δ 8.07-8.05 (m, 2H), 7.06-7.04 (m, 2H), 3.88 (s, 3H). <sup>13</sup>C NMR (125 MHz, CDCl<sub>3</sub>) δ 161.6, 156.5 (t, *J* = 28.8 Hz), 129.6, 121.8, 118.4 (qt, *J* = 286.3, 32.5 Hz), 114.1-108.3 (m), 55.6. <sup>19</sup>F NMR (471 MHz, CDCl<sub>3</sub>) δ (-81.09)-(-81.13) (m), (-111.81)-(-111.87) (m), (-122.45)-(-122.58) (m), (-126.37)-(-126.45) (m). HRMS (ESI) *m/z* calcd. for C<sub>13</sub>H<sub>7</sub>F<sub>11</sub>N<sub>4</sub>ONa [M+Na]<sup>+</sup> 467.0355, found 467.0353.

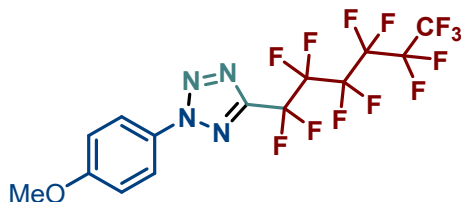

(73) Colorless oil; <sup>1</sup>H NMR (500 MHz, CDCl<sub>3</sub>) δ 8.09-8.07 (m, 2H), 7.07-7.06 (m, 2H), 3.90 (s, 3H). <sup>13</sup>C NMR (150 MHz, CDCl<sub>3</sub>) δ 161.6, 156.6 (t, *J* = 28.5 Hz), 129.7, 121.8, 118.2 (qt, *J* = 286.5, 33.0 Hz), 113.2-108.0 (m), 55.6. <sup>19</sup>F NMR (565 MHz, CDCl<sub>3</sub>) δ (-81.01)-(-81.05) (m), (-111.70)-(-111.75) (m), (-121.58)-(-121.62) (m), (-122.27)-(-122.31) (m), (-122.87)-(-122.90) (m), (-126.23)-(-126.29) (m). HRMS (ESI) *m/z* calcd. for C<sub>14</sub>H<sub>7</sub>F<sub>13</sub>N<sub>4</sub>ONa [M+Na]<sup>+</sup> 517.0438, found

517.0441.

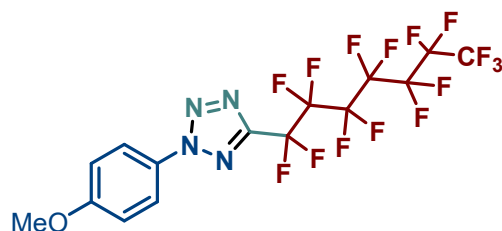

(74) Colorless oil;  $^1\text{H NMR}$  (500 MHz,  $\text{CDCl}_3$ )  $\delta$  8.08-8.04 (m, 2H), 7.06-7.03 (m, 2H), 3.88 (s, 3H).  $^{13}\text{C NMR}$  (125 MHz,  $\text{CDCl}_3$ )  $\delta$  161.6, 156.6 (t,  $J = 28.8$  Hz), 129.7, 121.8, 118.3 (qt,  $J = 286.3, 32.5$  Hz), 113.8-108.1 (m), 55.6.  $^{19}\text{F NMR}$  (471 MHz,  $\text{CDCl}_3$ )  $\delta$  (-81.18)-(-81.22) (m), (-111.80)-(-111.85) (m), (-121.47)-(-121.59) (m), (-122.15)-(-122.37) (m), (-122.89)-(-122.98) (m), (-126.37)-(-126.45) (m). HRMS (ESI)  $m/z$  calcd. for  $\text{C}_{15}\text{H}_7\text{F}_{15}\text{N}_4\text{ONa}$   $[\text{M}+\text{Na}]^+$  567.0395, found 567.0391.

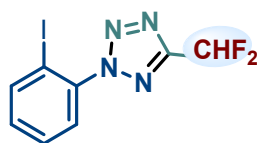

(75) Red oil;  $^1\text{H NMR}$  (500 MHz,  $\text{CDCl}_3$ )  $\delta$  8.08 (dd,  $J = 8.0$  Hz, 1.5 Hz, 1H), 7.60-7.53 (m, 2H), 7.37 (td,  $J = 7.0$  Hz, 1.5 Hz, 1H), 7.08 (t,  $J = 53.0$  Hz, 1H).  $^{13}\text{C NMR}$  (125 MHz,  $\text{CDCl}_3$ )  $\delta$  160.2 (t,  $J = 27.5$  Hz), 140.8, 139.6, 132.7, 129.2, 127.6, 107.5 (t,  $J = 237.5$  Hz), 92.4.  $^{19}\text{F NMR}$  (471 MHz,  $\text{CDCl}_3$ )  $\delta$  -117.05 (d,  $J = 53.2$  Hz). HRMS (ESI)  $m/z$  calcd. for  $\text{C}_8\text{H}_5\text{F}_2\text{IN}_4\text{Na}$   $[\text{M}+\text{Na}]^+$  344.9545, found 344.9546.

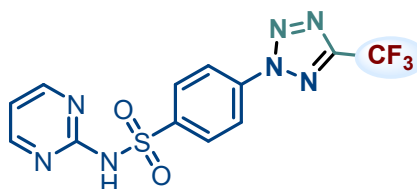

(76) Yellow solid; mp: 147-149 °C;  $^1\text{H NMR}$  (600 MHz, DMSO)  $\delta$  12.29 (s, 1H), 8.53 (d,  $J = 5.0$  Hz, 2H), 8.37 (d,  $J = 8.5$  Hz, 2H), 8.29 (d,  $J = 8.5$  Hz, 2H), 7.06 (d,  $J = 5.0$  Hz, 1H).  $^{13}\text{C NMR}$  (125 MHz, DMSO)  $\delta$  158.9, 157.4, 156.7 (q,  $J = 40.0$  Hz), 143.3, 138.6, 130.2, 121.6, 119.9 (q,  $J = 267.5$  Hz), 116.0.  $^{19}\text{F NMR}$  (565 MHz, DMSO)  $\delta$  -62.80 (s). HRMS (ESI)  $m/z$  calcd. for  $\text{C}_{12}\text{H}_8\text{F}_3\text{N}_7\text{O}_2\text{SNa}$   $[\text{M}+\text{Na}]^+$  394.0483, found 394.0484.

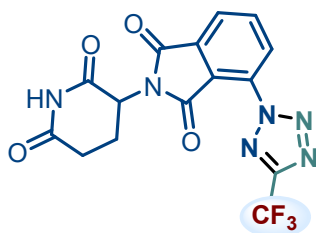

(77) White solid; mp: 125-126 °C;  $^1\text{H NMR}$  (500 MHz, DMSO)  $\delta$  11.15 (s, 1H), 8.32 (t,  $J = 8.5$  Hz, 2H), 8.23 (t,  $J = 7.5$  Hz, 1H), 5.18 (dd,  $J = 13.0$  Hz,  $J = 5.5$  Hz, 1H), 2.90-2.83 (m, 1H), 2.62-2.58 (m, 1H), 2.53-2.44 (m, 2H), 2.09-2.05 (m, 1H).  $^{13}\text{C NMR}$  (150 MHz, DMSO)  $\delta$  173.2, 170.0, 166.0, 163.9, 156.6 (q,  $J = 40.5$  Hz), 137.4, 133.6, 132.5, 130.9, 127.4, 125.7, 119.8 (q,  $J = 268.5$  Hz), 49.9, 31.4, 22.2.  $^{19}\text{F NMR}$  (565 MHz, DMSO)  $\delta$  -62.69 (s). HRMS (ESI)  $m/z$  calcd. for  $\text{C}_{15}\text{H}_9\text{F}_3\text{N}_6\text{O}_4\text{Na}$   $[\text{M}+\text{Na}]^+$  417.0736, found 417.0735.

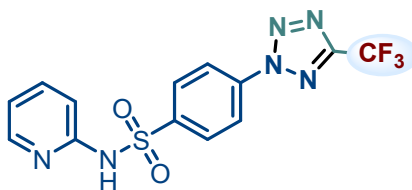

(78) White solid; mp: 136-137 °C;  $^1\text{H NMR}$  (600 MHz, DMSO)  $\delta$  12.76 (s, 1H), 8.32 (d,  $J = 9.0$  Hz, 2H), 8.18 (d,  $J = 9.0$  Hz, 2H), 7.97 (d,  $J = 4.8$  Hz, 1H), 7.82-7.79 (m, 1H), 7.28 (d,  $J = 9.0$  Hz, 1H), 6.87 (d,  $J = 6.6$  Hz, 1H).  $^{13}\text{C NMR}$  (150 MHz, DMSO)  $\delta$  156.6 (q,  $J = 40.0$  Hz), 154.5, 145.6, 142.4, 138.0, 129.4, 129.0, 127.0, 121.8, 119.8 (q,  $J = 268.0$  Hz), 115.4.  $^{19}\text{F NMR}$  (565 MHz, DMSO)  $\delta$  -62.81 (s). HRMS (ESI)  $m/z$  calcd. for  $\text{C}_{13}\text{H}_9\text{F}_3\text{N}_6\text{O}_2\text{SNa}$   $[\text{M}+\text{Na}]^+$  393.0710, found 393.0711.

## V. References

- [1] a) X. Zhang, Z. Liu, X. Yang, Y. Dong, M. Virelli, G. Zanoni, E. A. Anderson, X. Bi, *Nat. Commun.* **2019**, *10*, 284-292; b) Y. Ning, Y. Gai, X. Zhang, Y. Dong, P. Sivaguru, Y. Wang, B. R. P. Reddy, G. Zanoni, X. Bi, *Angew. Chem. Int. Ed.* **2020**, *59*, 6473-6481; *Angew. Chem. Int. Ed.* **2020**, *132*, 6535-6543; c) Y. Ning, H. Wang, P. Sivaguru, S. Li, G. Zanoni, S. P. Nolan, X. Bi, *Green Chem.* **2021**, *23*, 7976-7981.
- [2] Z Chen, S Q Fan, Y Zheng, J A Ma, *Chem. Commun.* **2015**, *51*, 16545-16548.

- [3] X Lin, B Luo, W He, Q Lu, L Li, H Zheng, W Wu, and Z Weng, *Tetrahedron Lett.* **2022**, 95, 153717.

## VI. Copies of NMR spectra

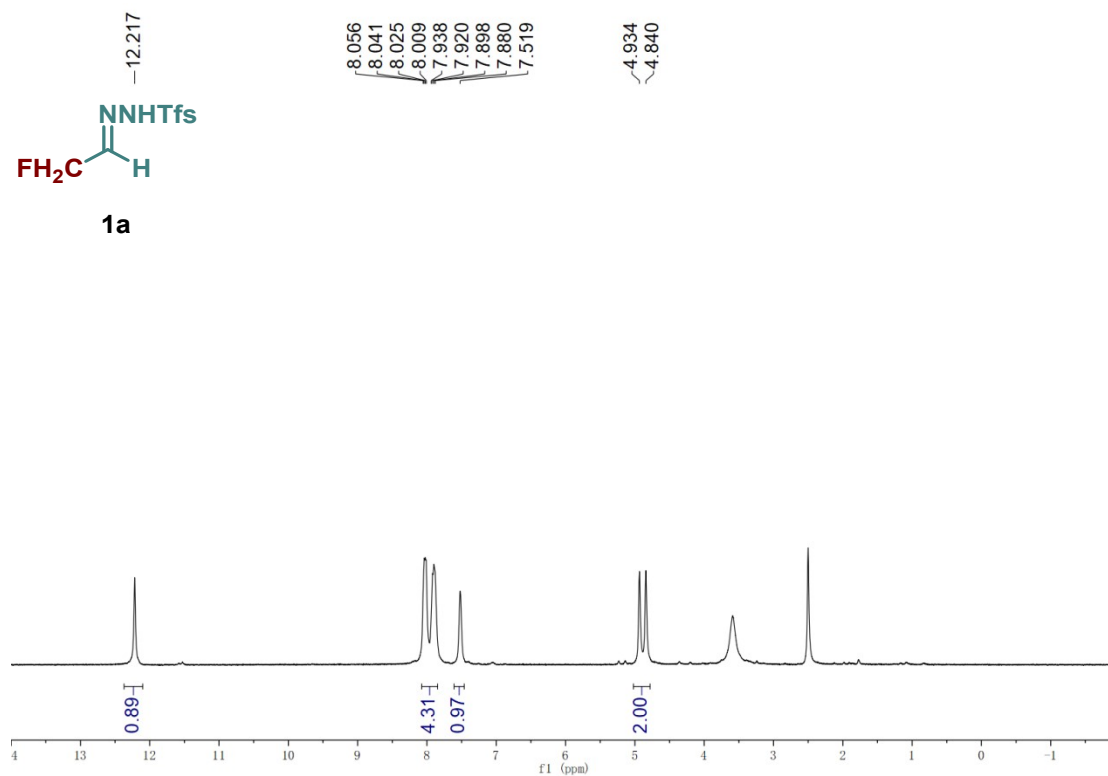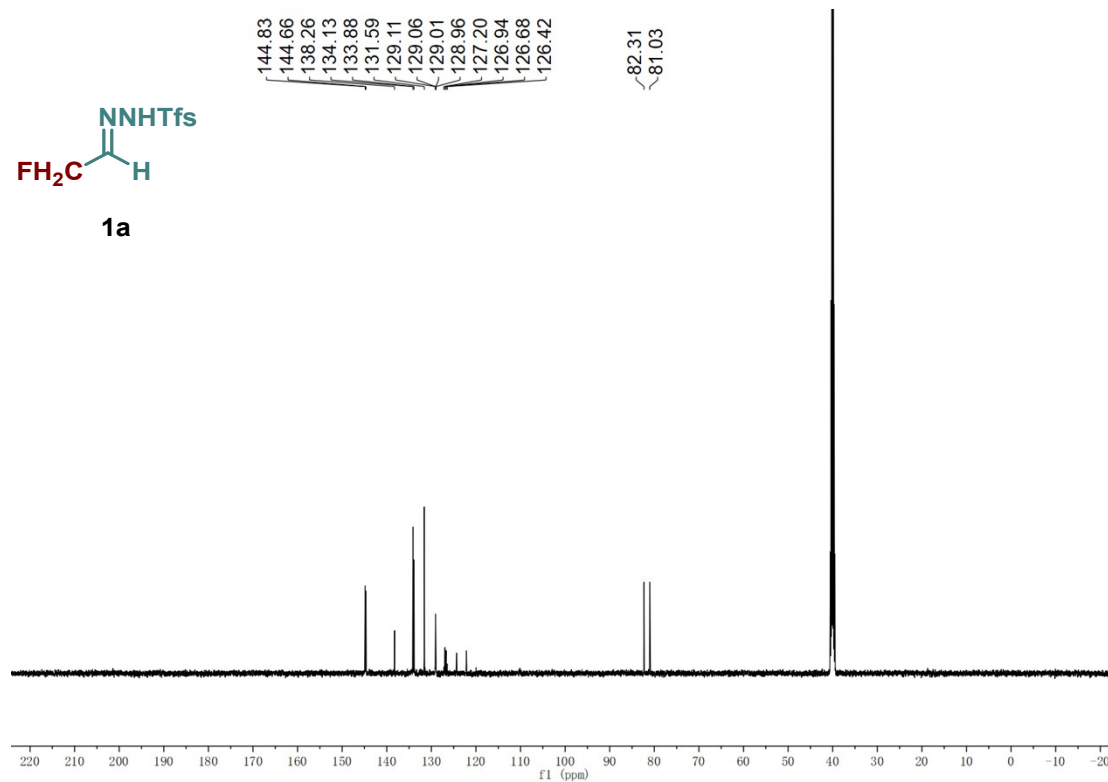

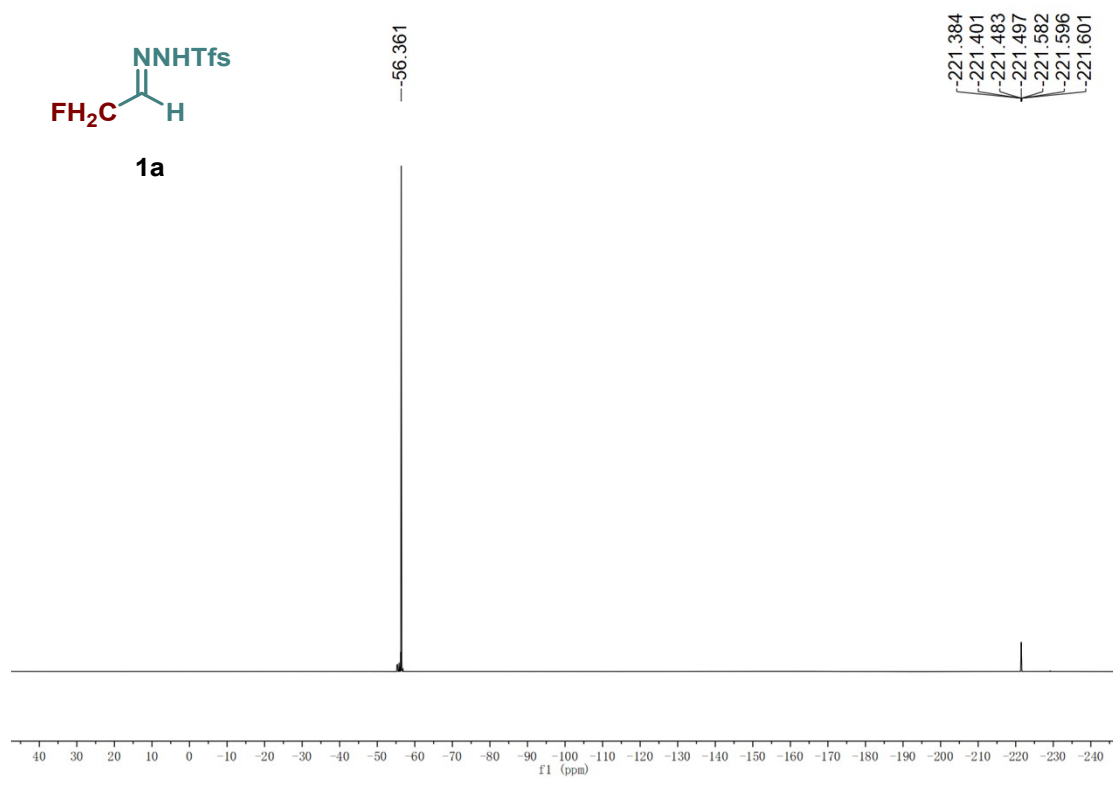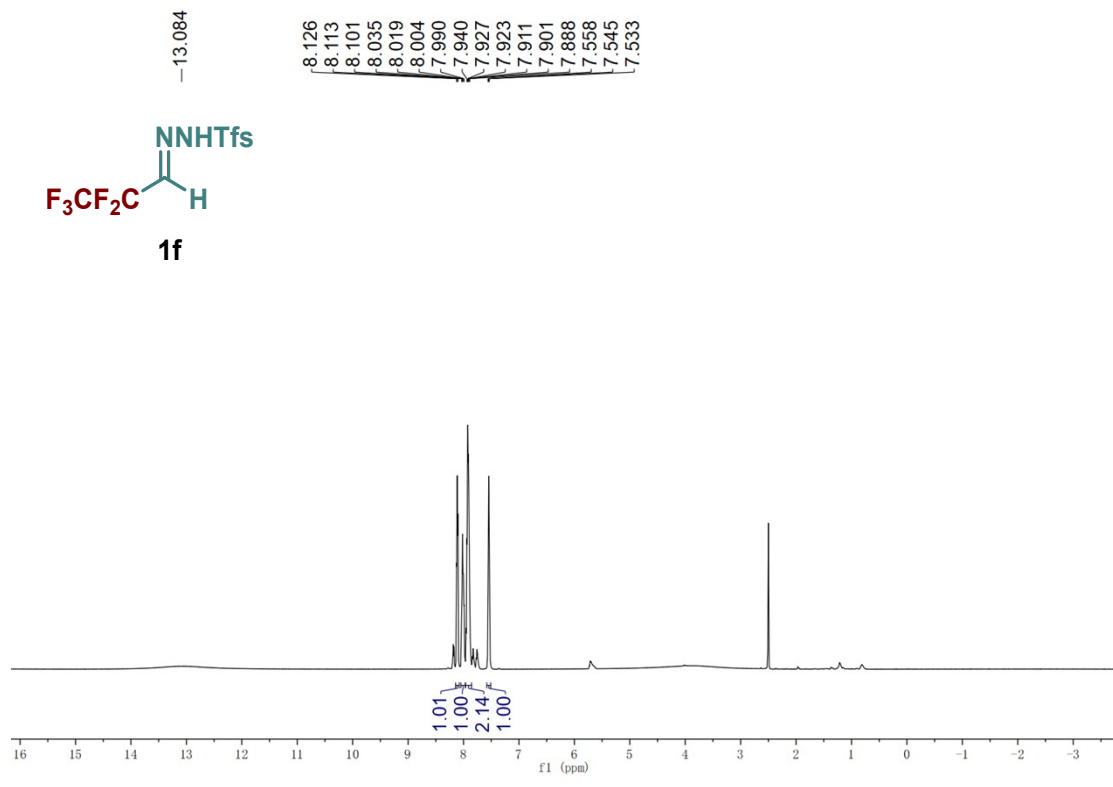



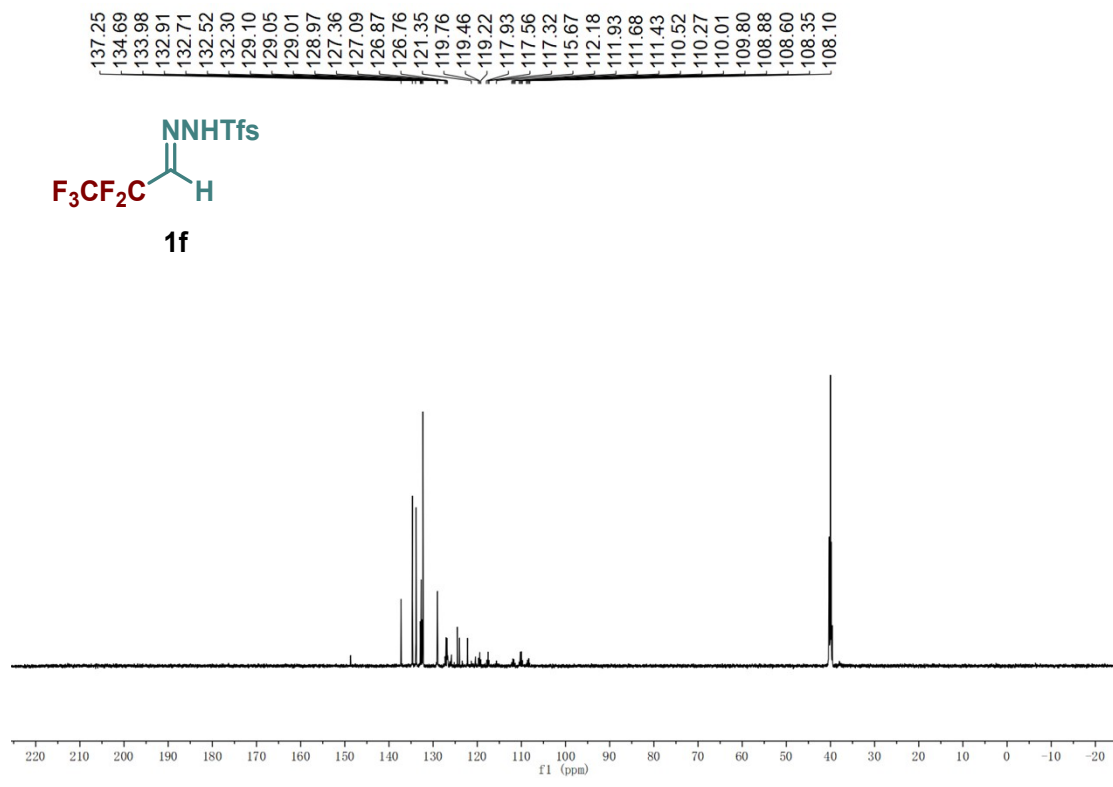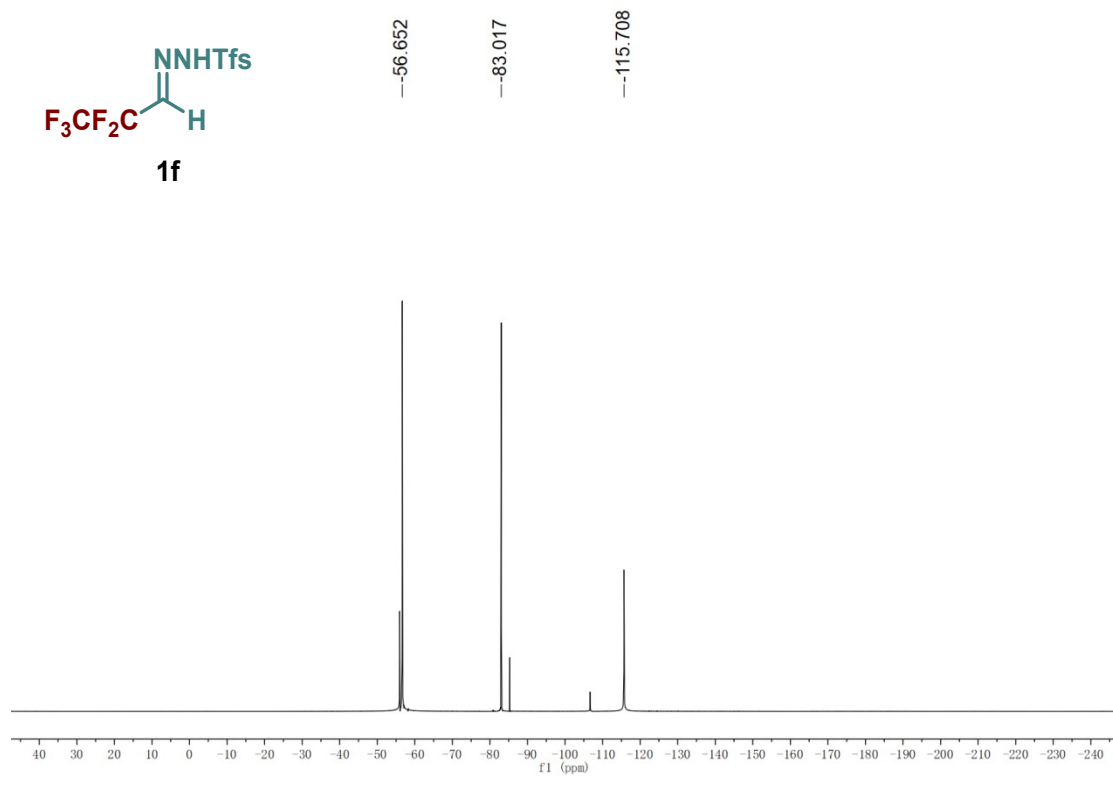

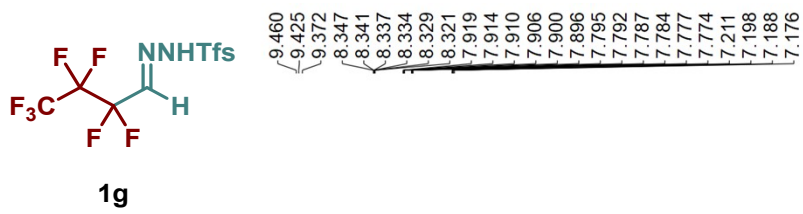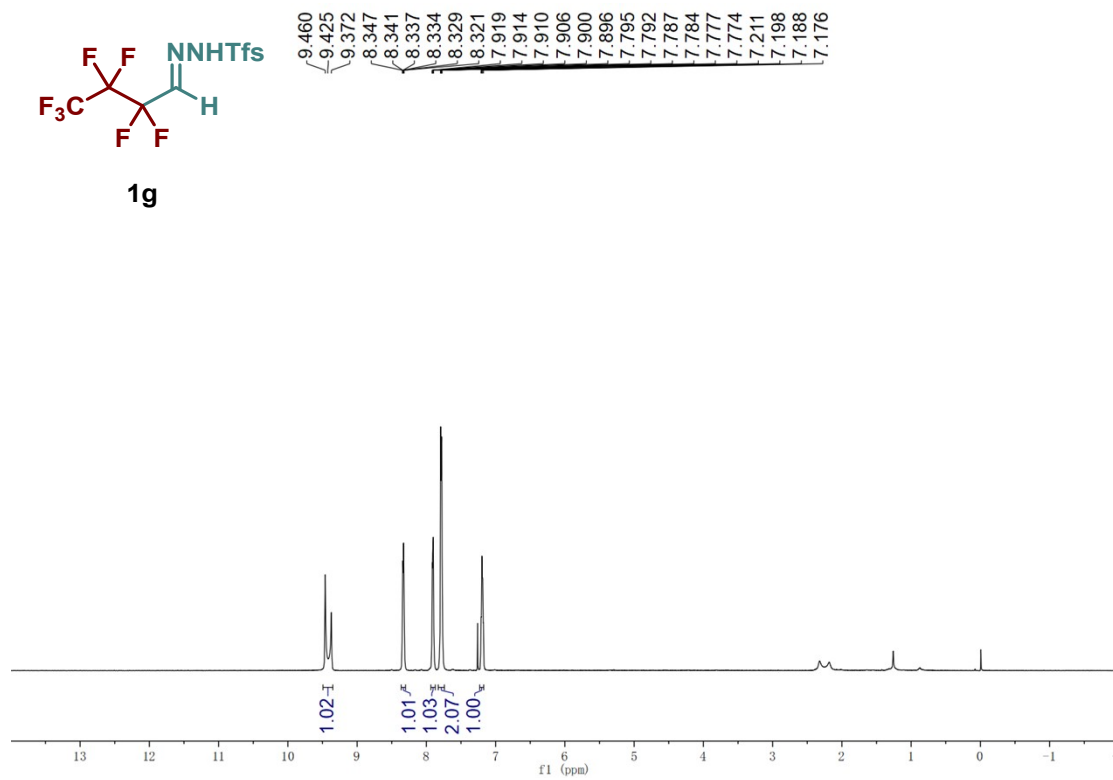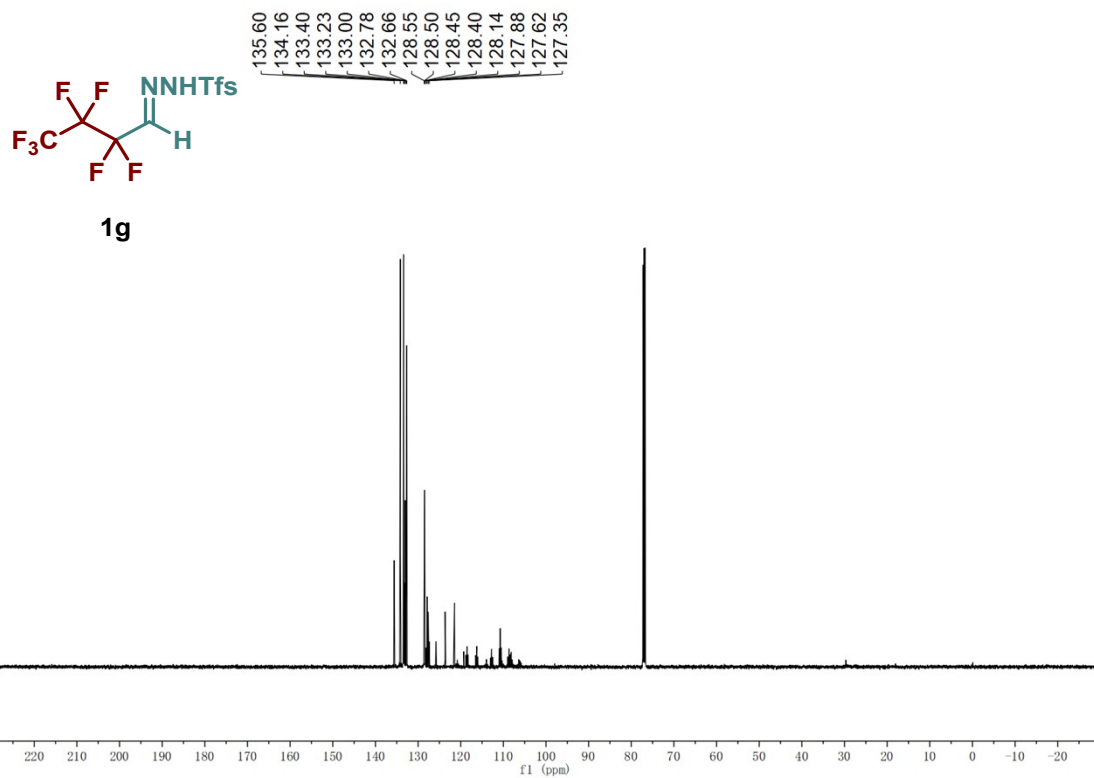

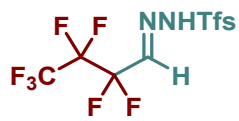

**1g**

-58.338  
 -80.627  
 -80.645  
 -80.663  
 -115.953  
 -115.971  
 -115.987  
 -127.652

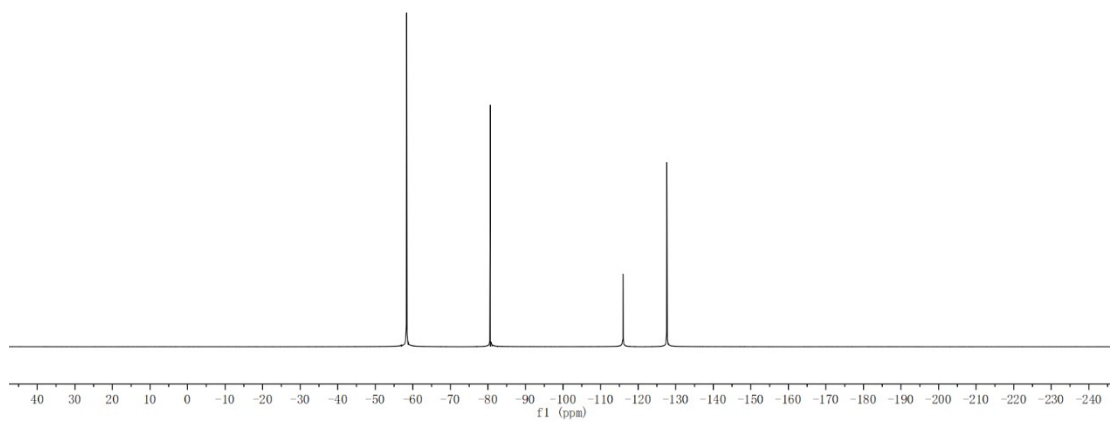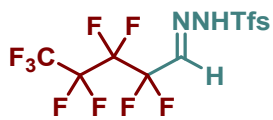

**1h**

-9.136  
 -8.363  
 -8.354  
 -8.350  
 -8.344  
 -8.344  
 7.923  
 7.917  
 7.913  
 7.904  
 7.796  
 7.791  
 7.787  
 7.782  
 7.777  
 7.189  
 7.176  
 7.162

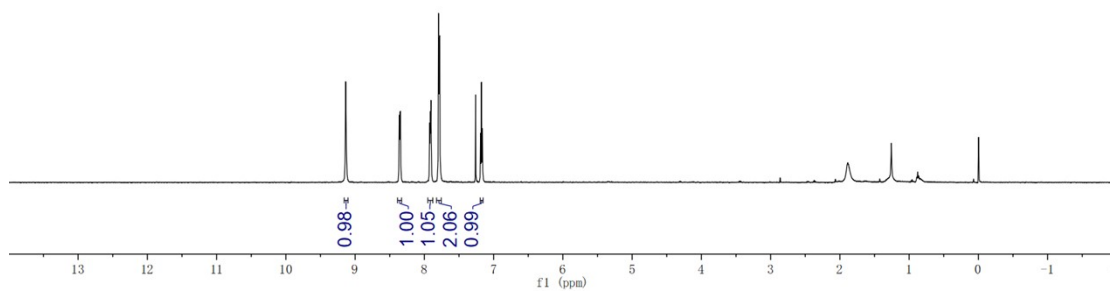

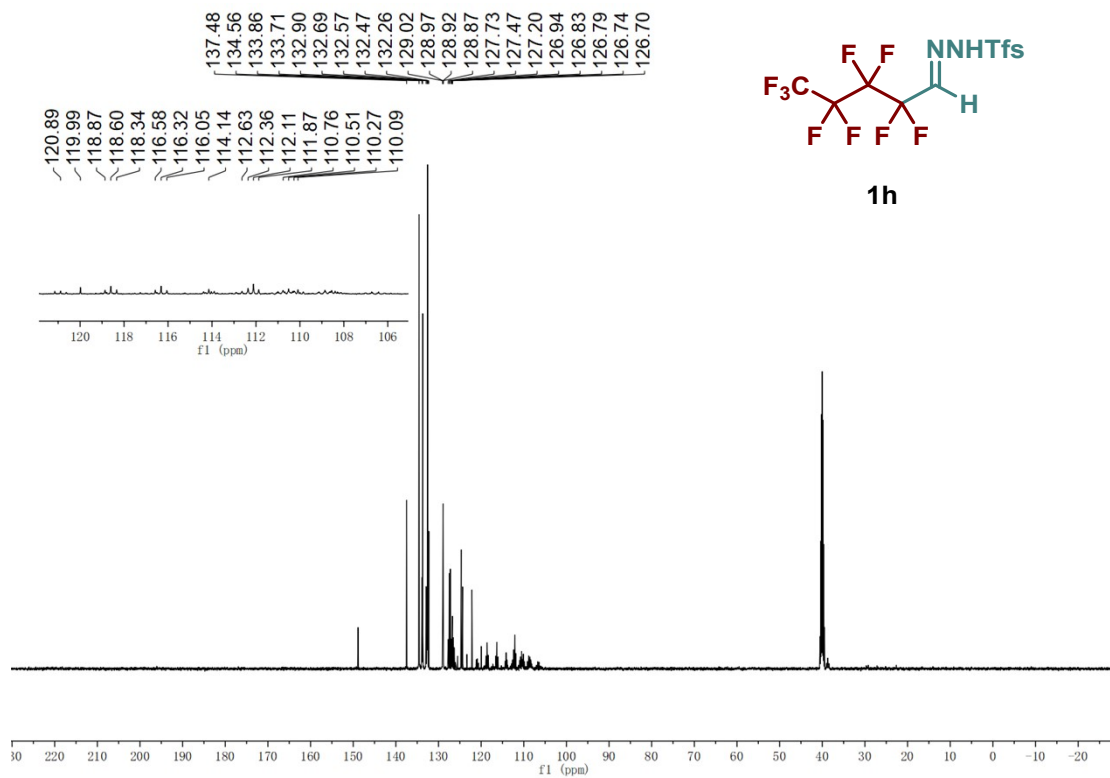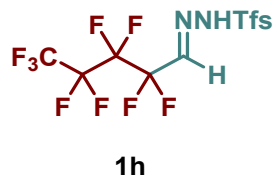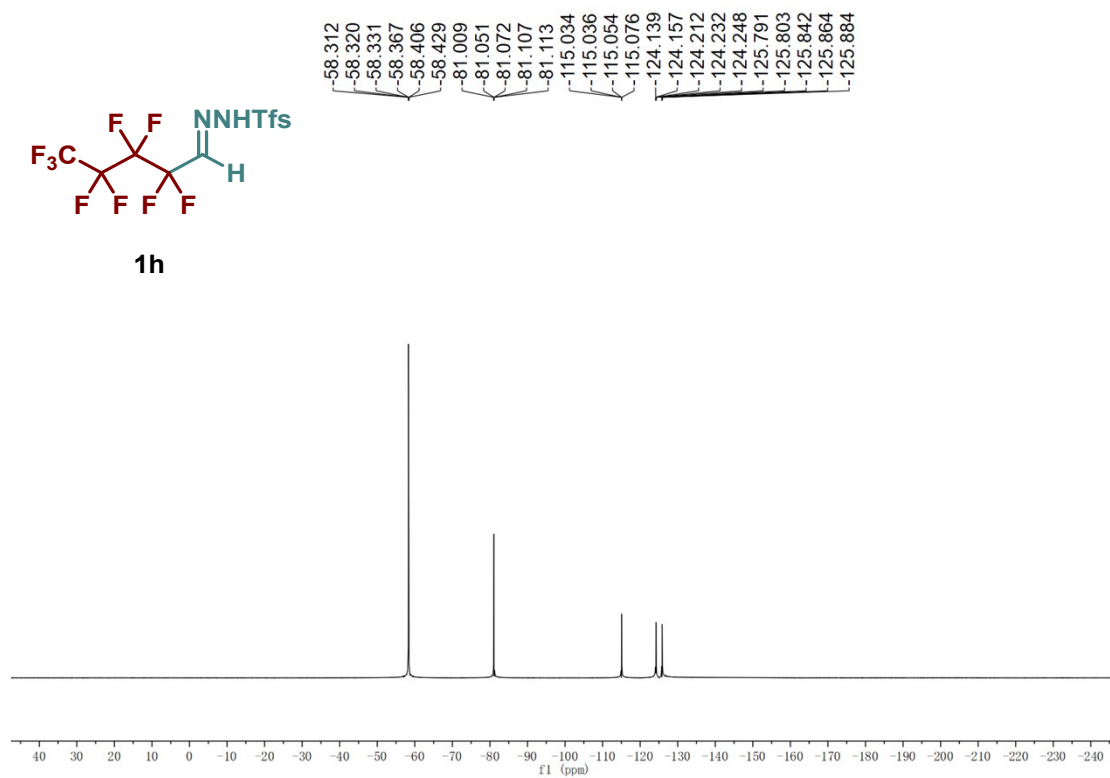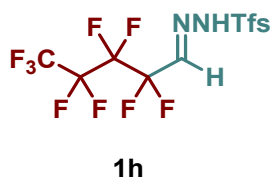

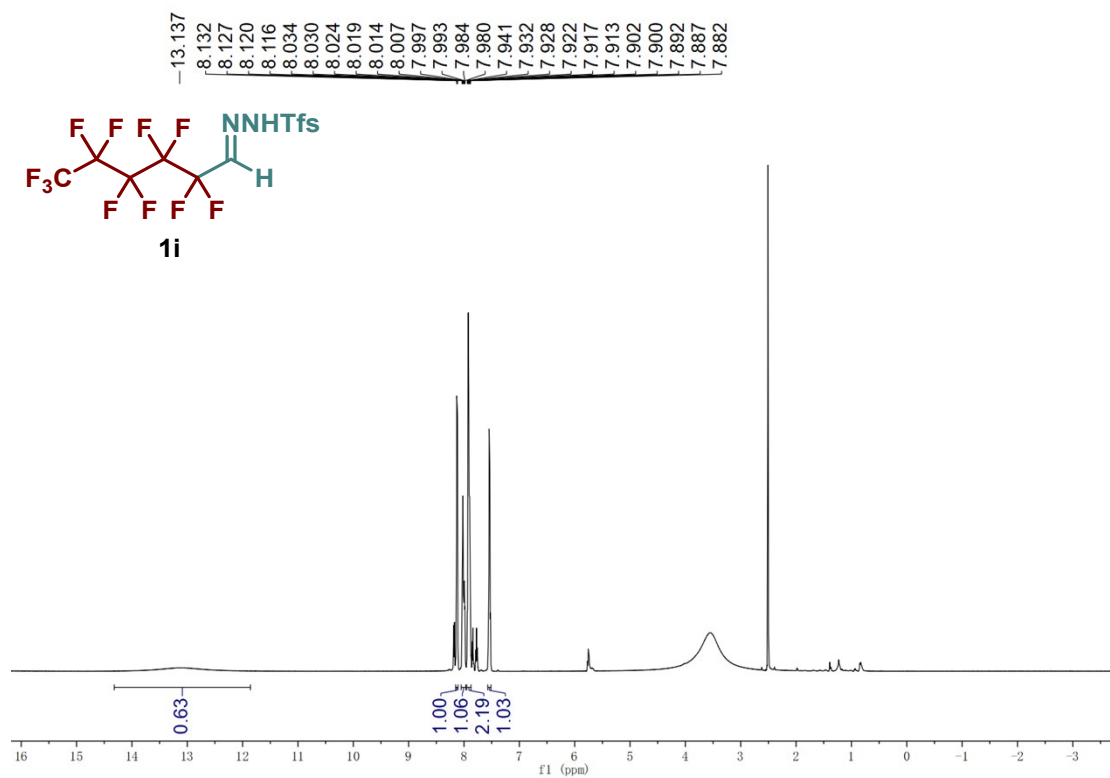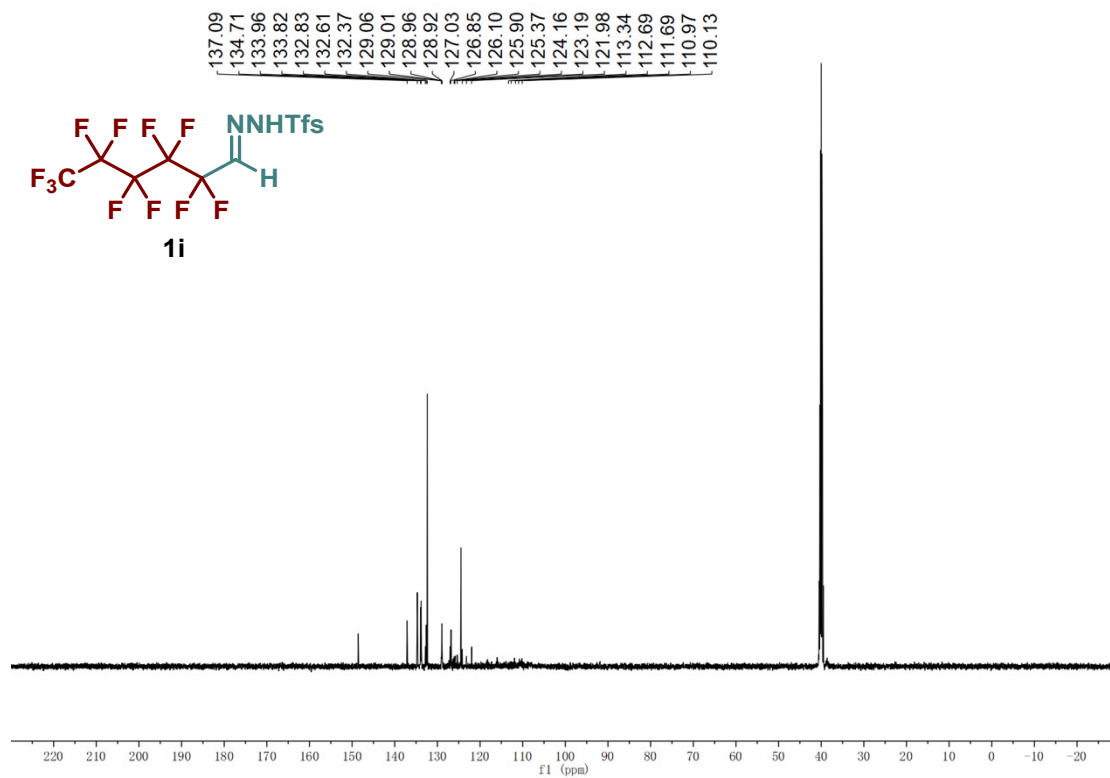

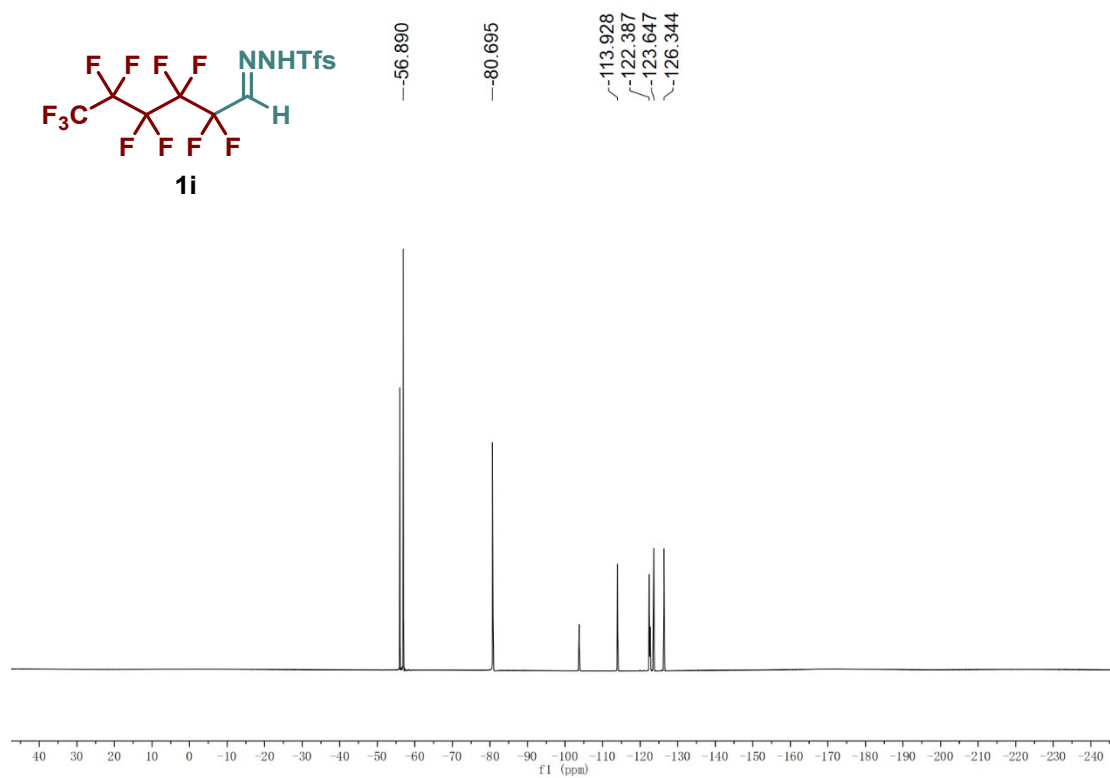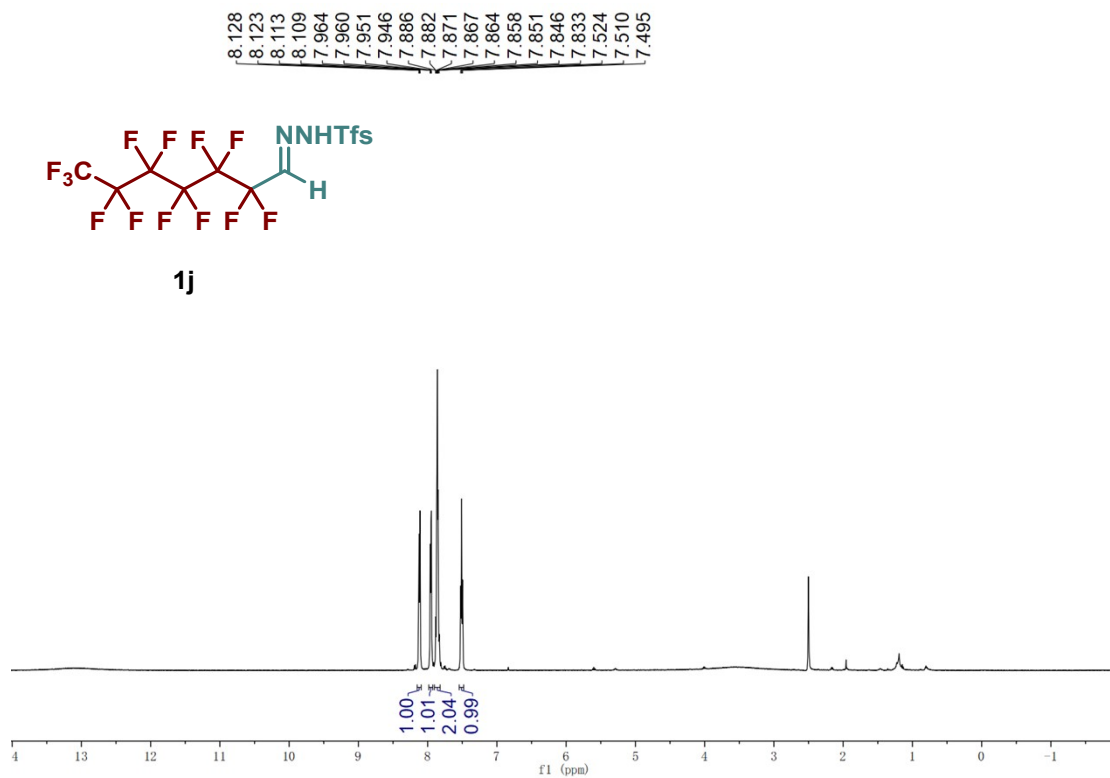

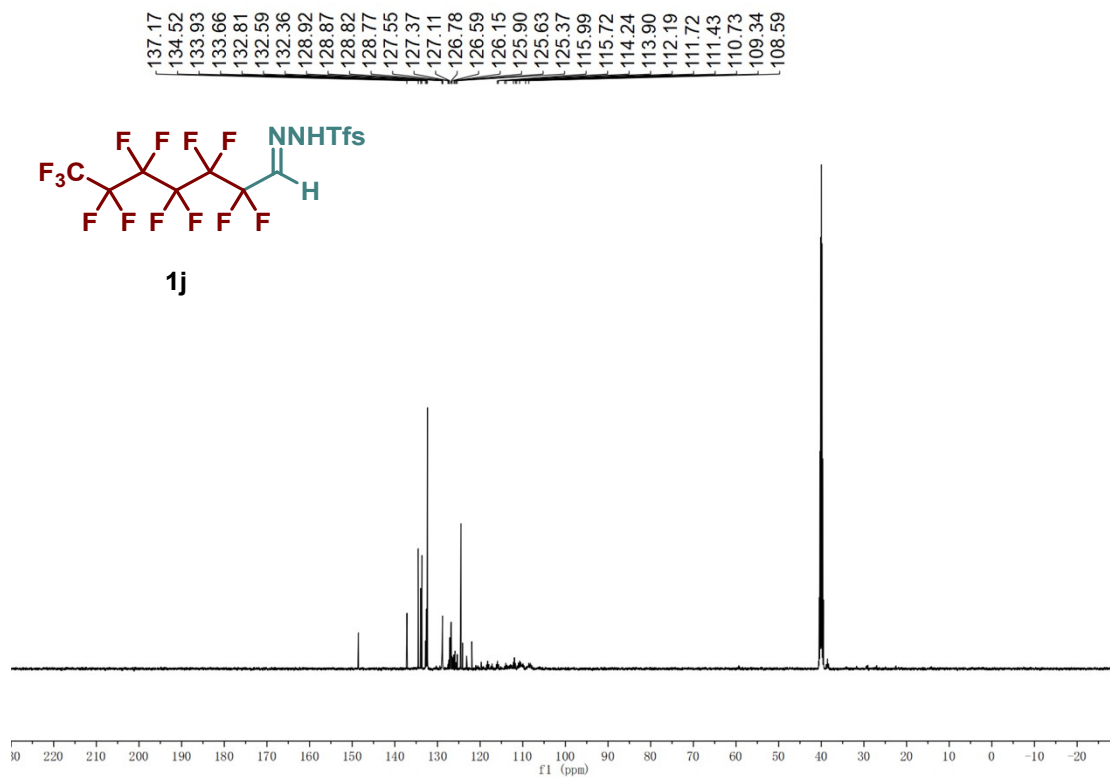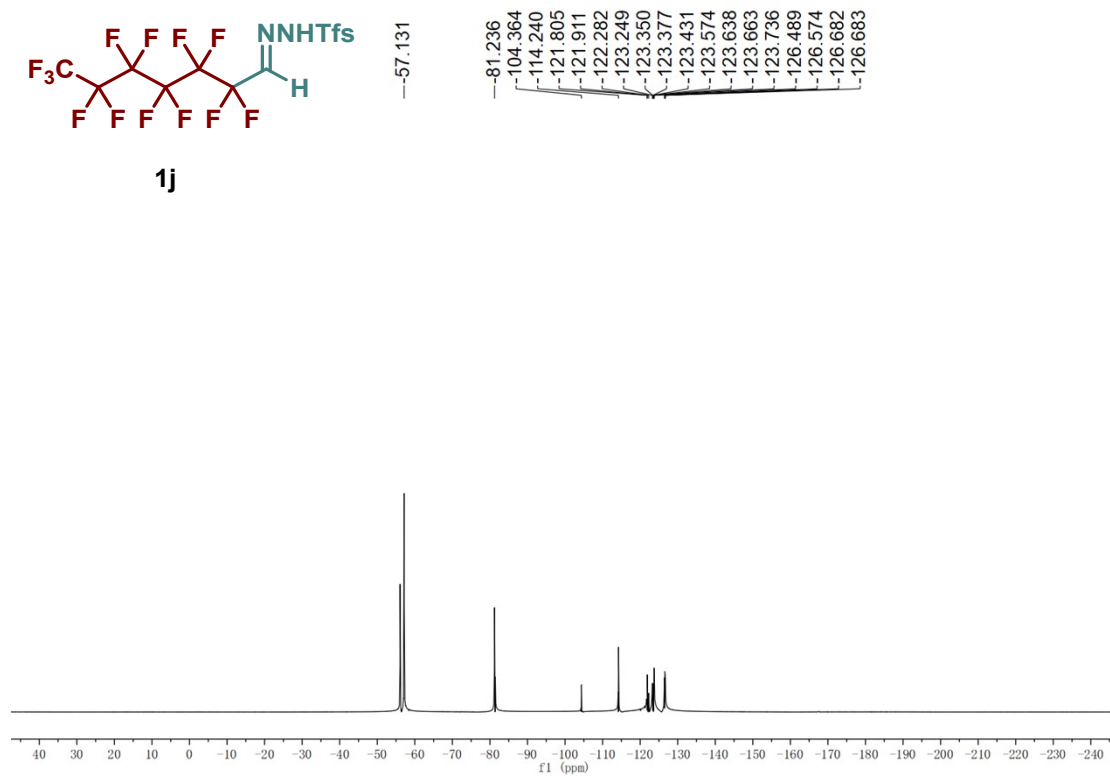

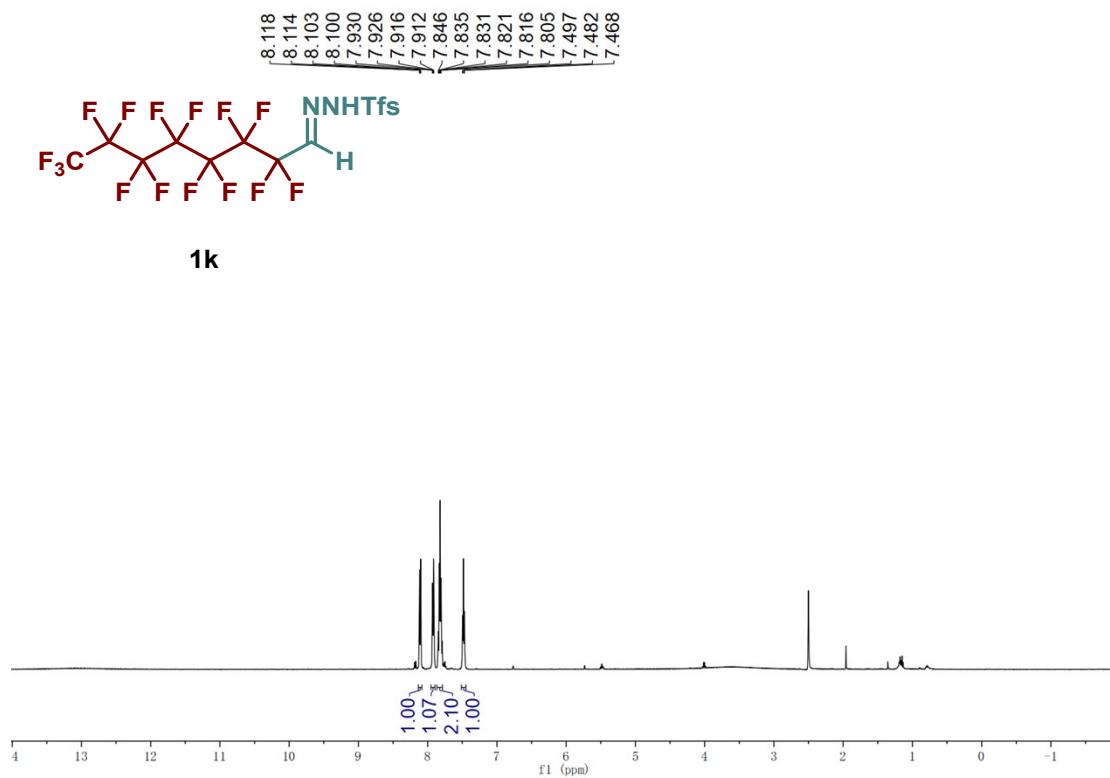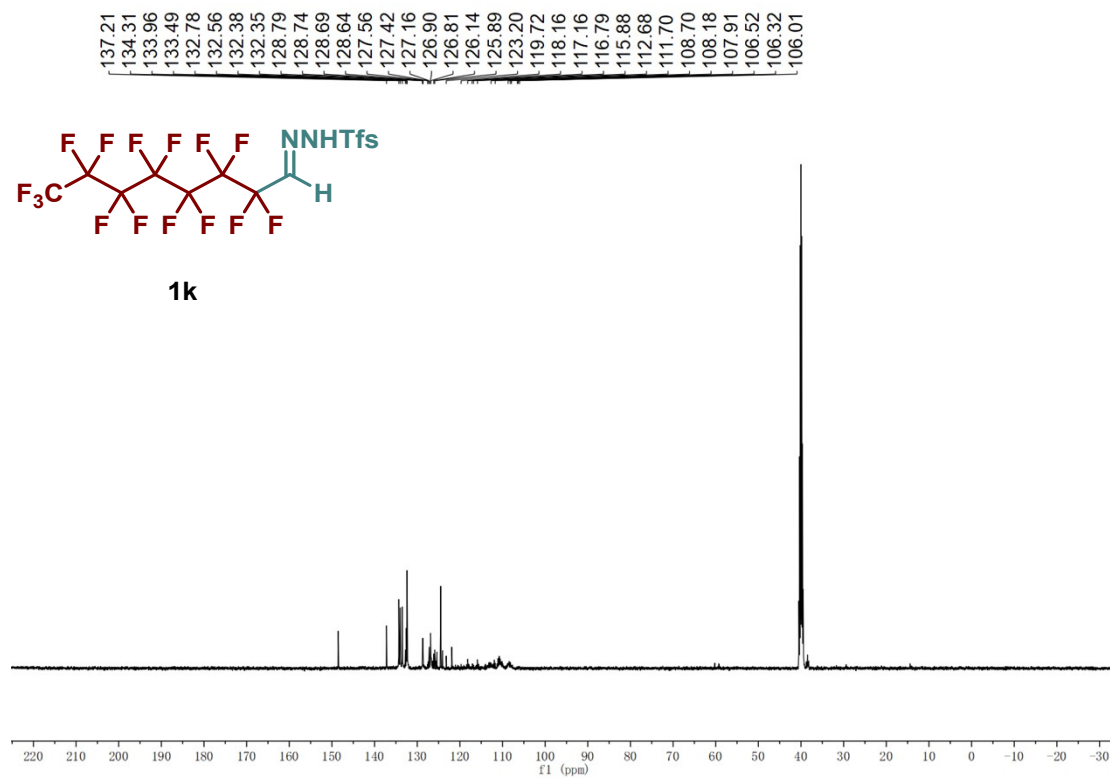



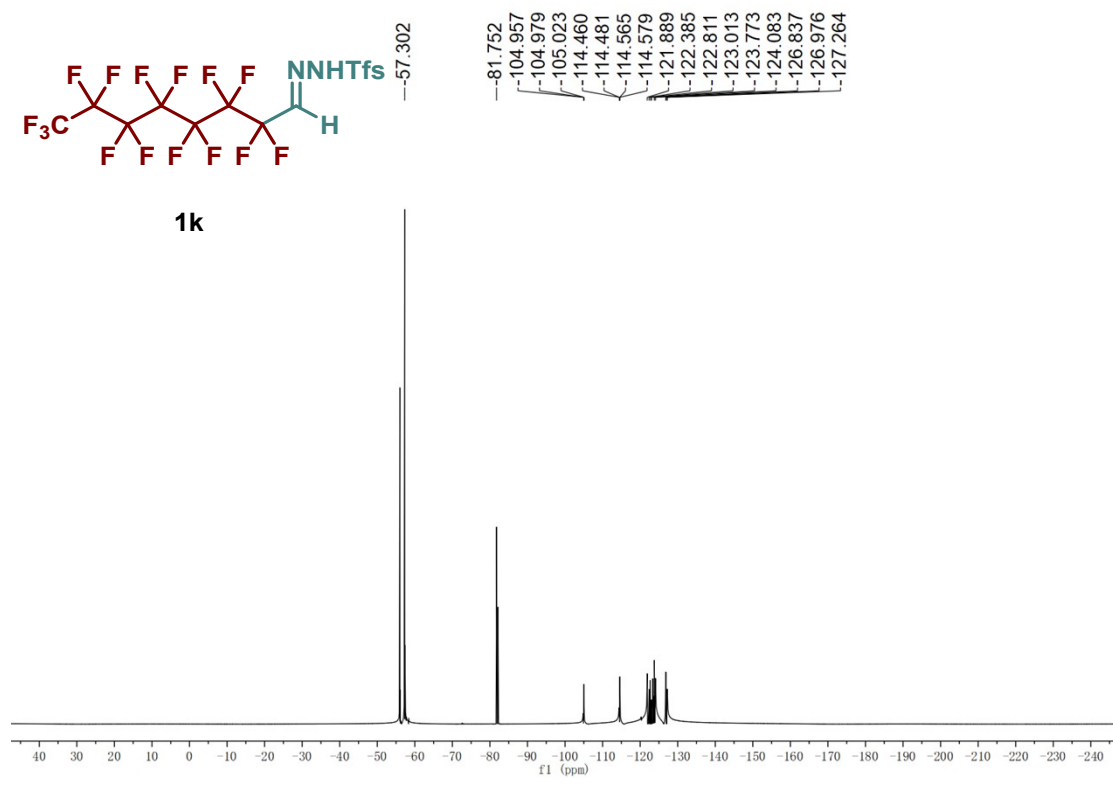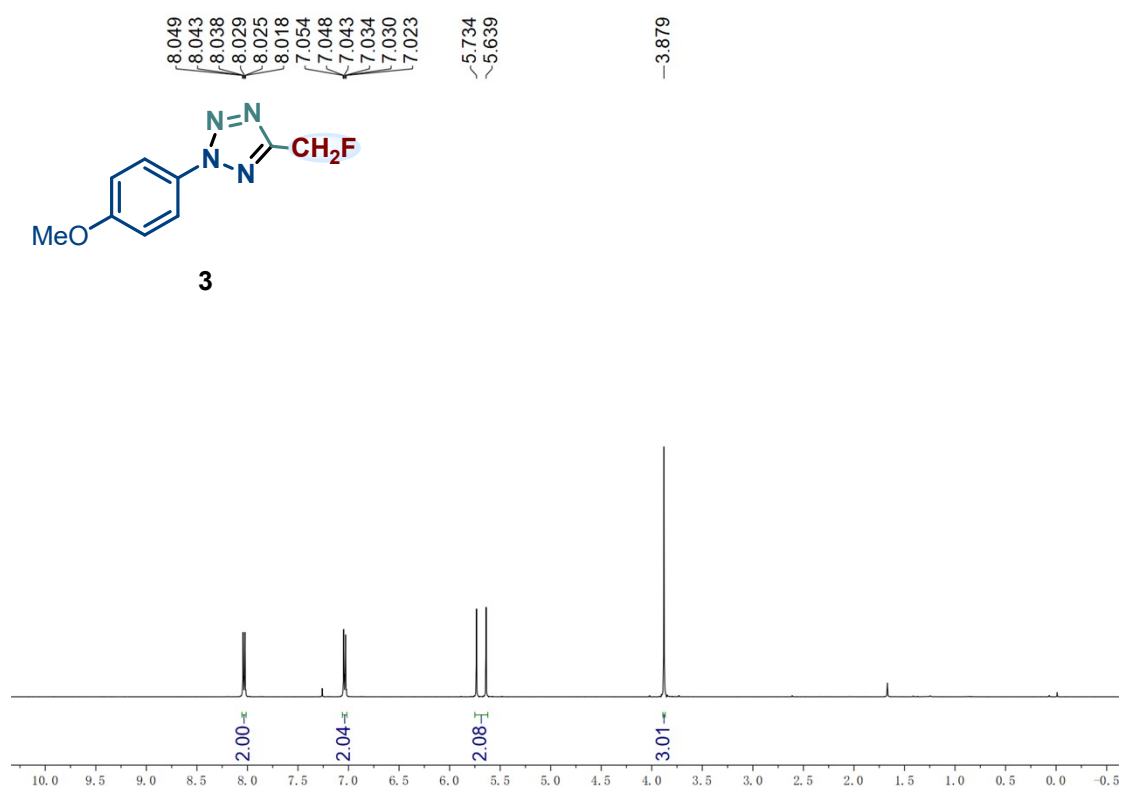

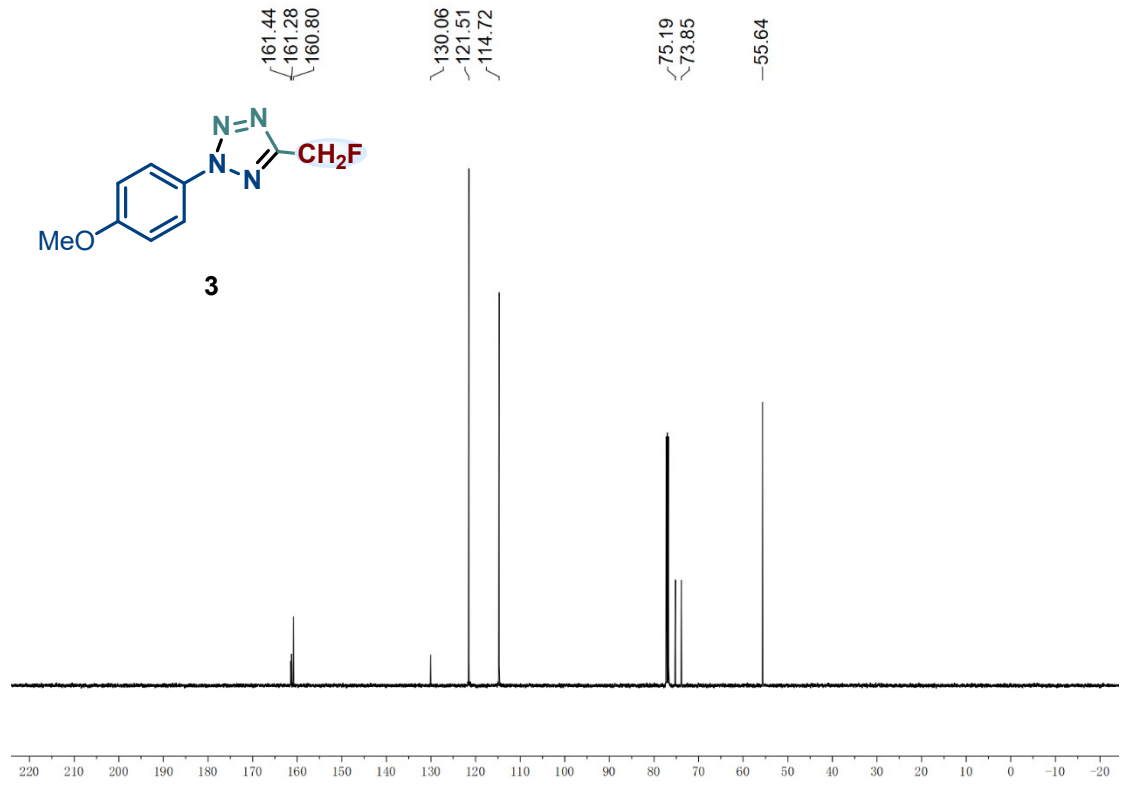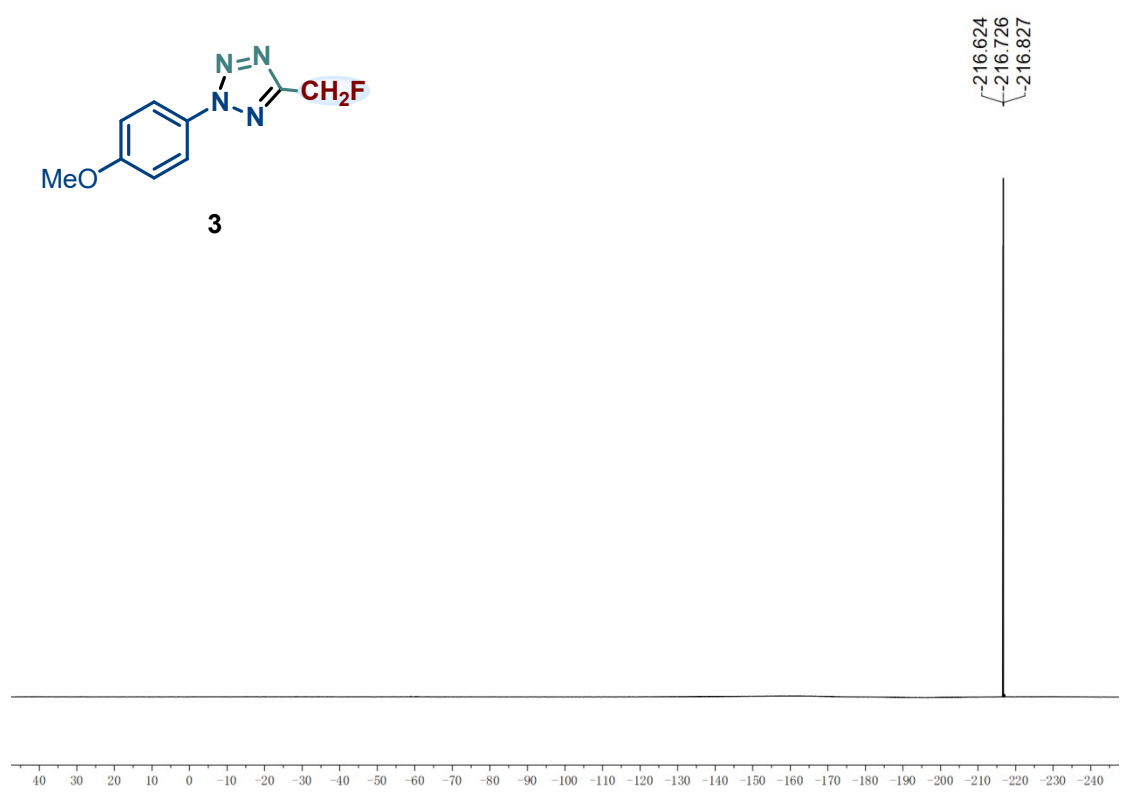

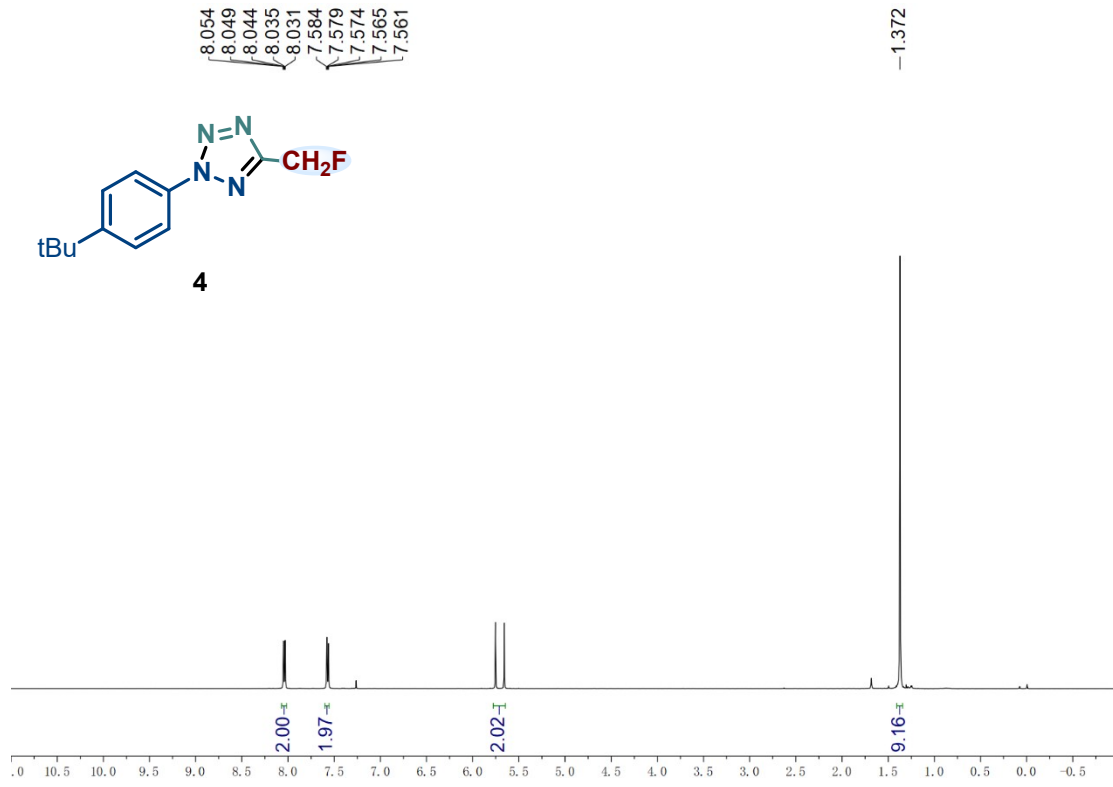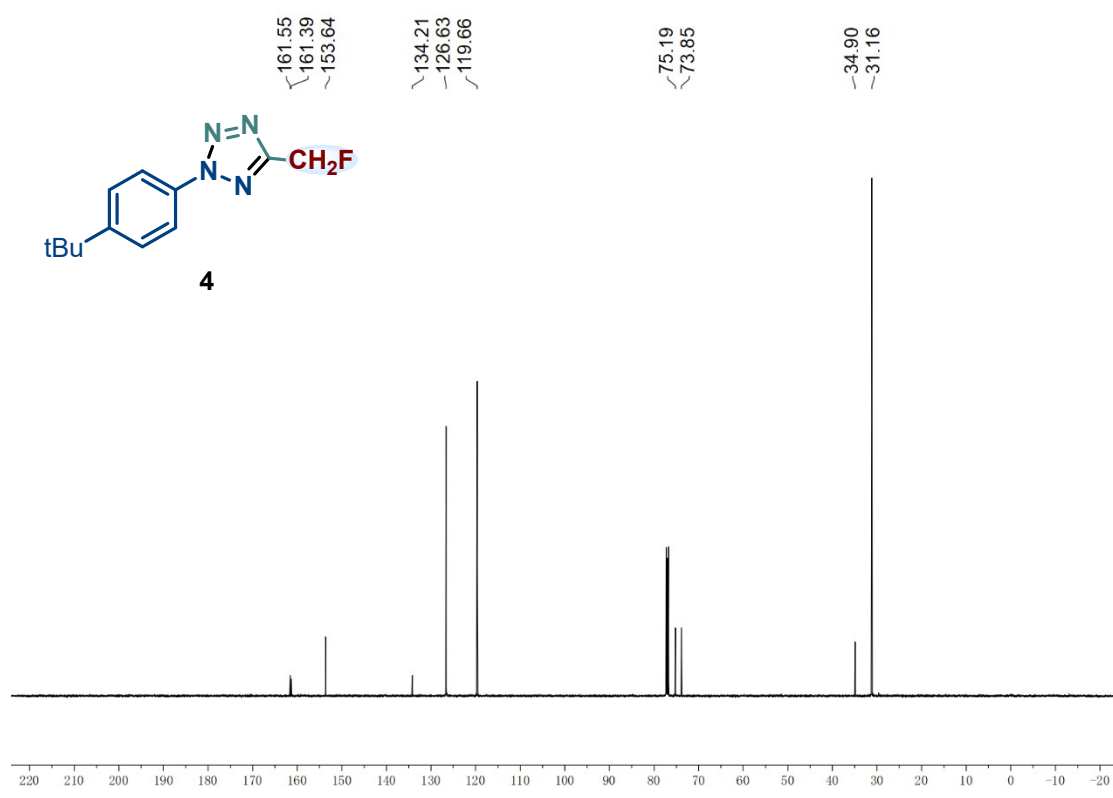

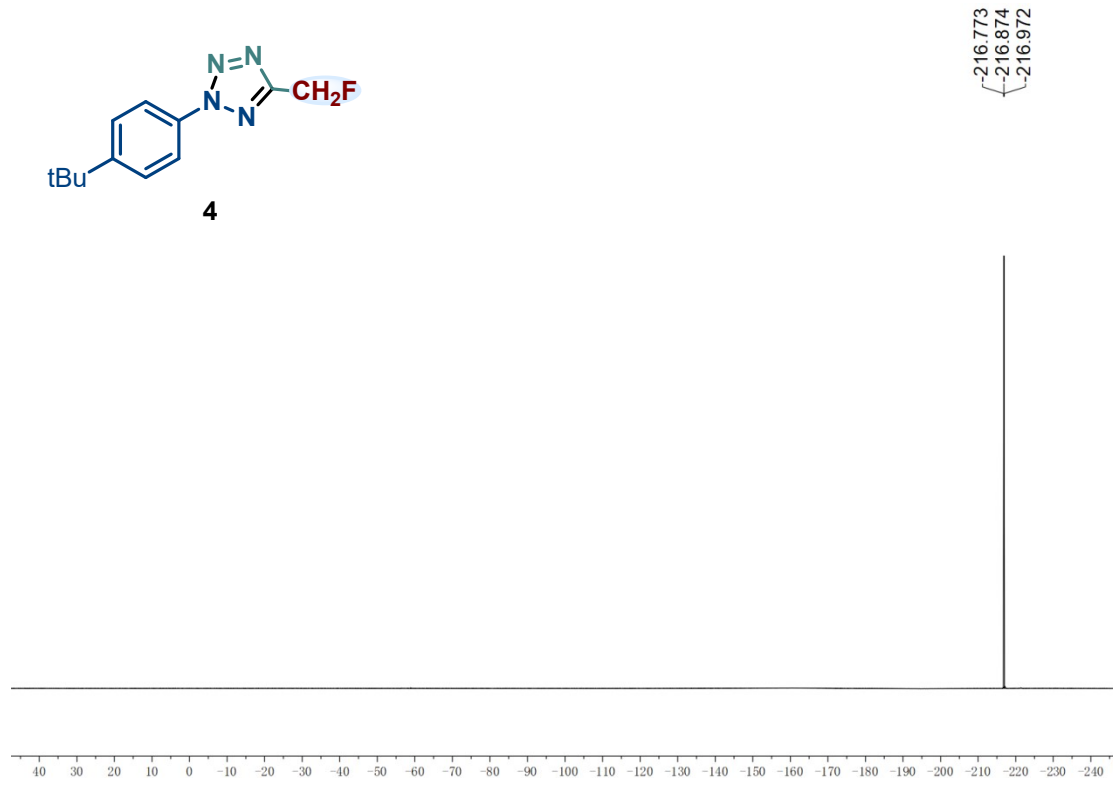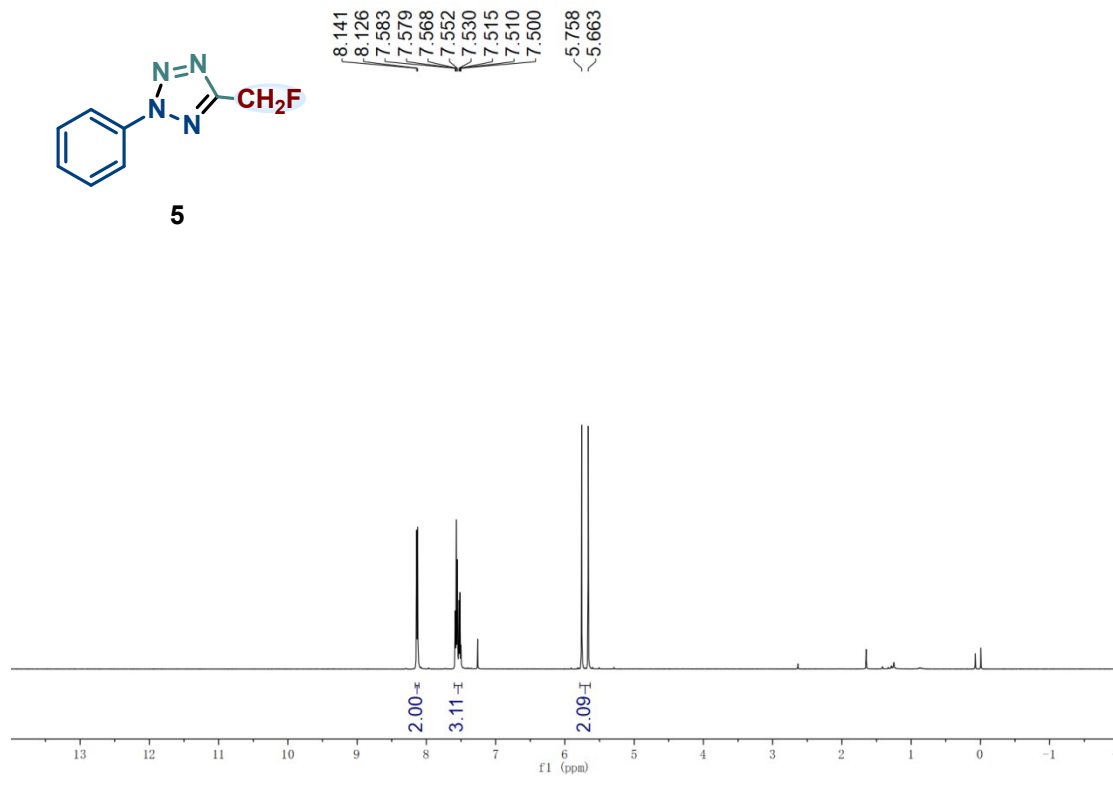

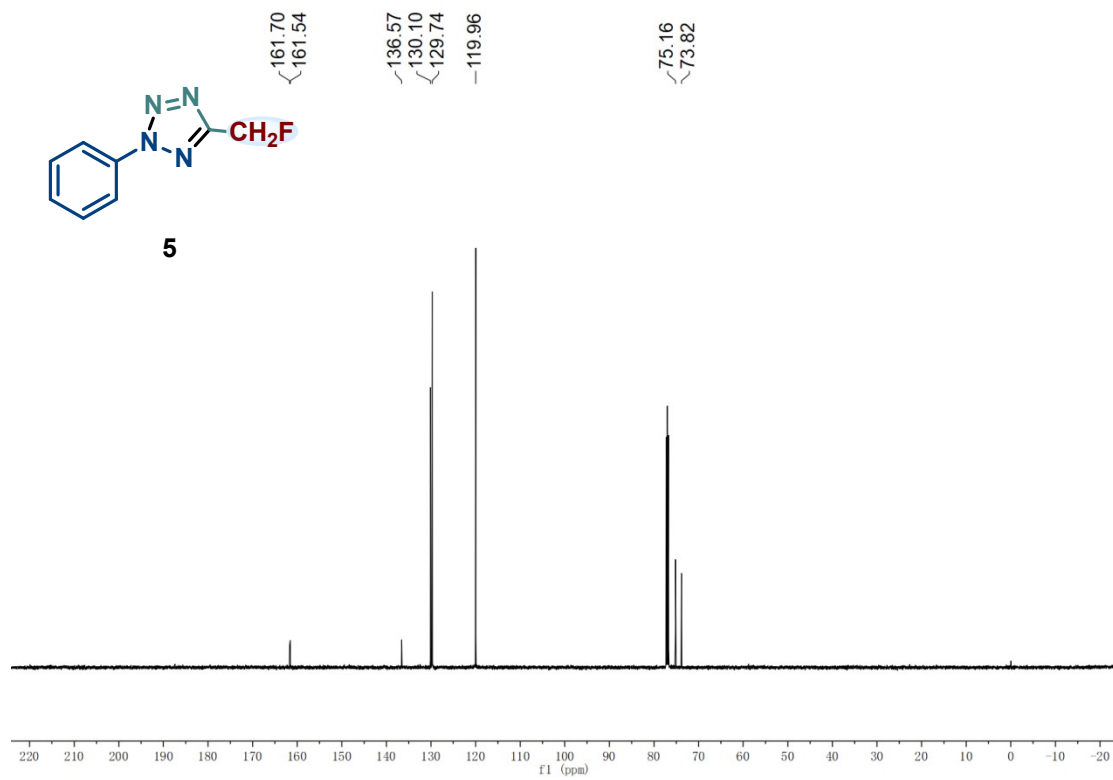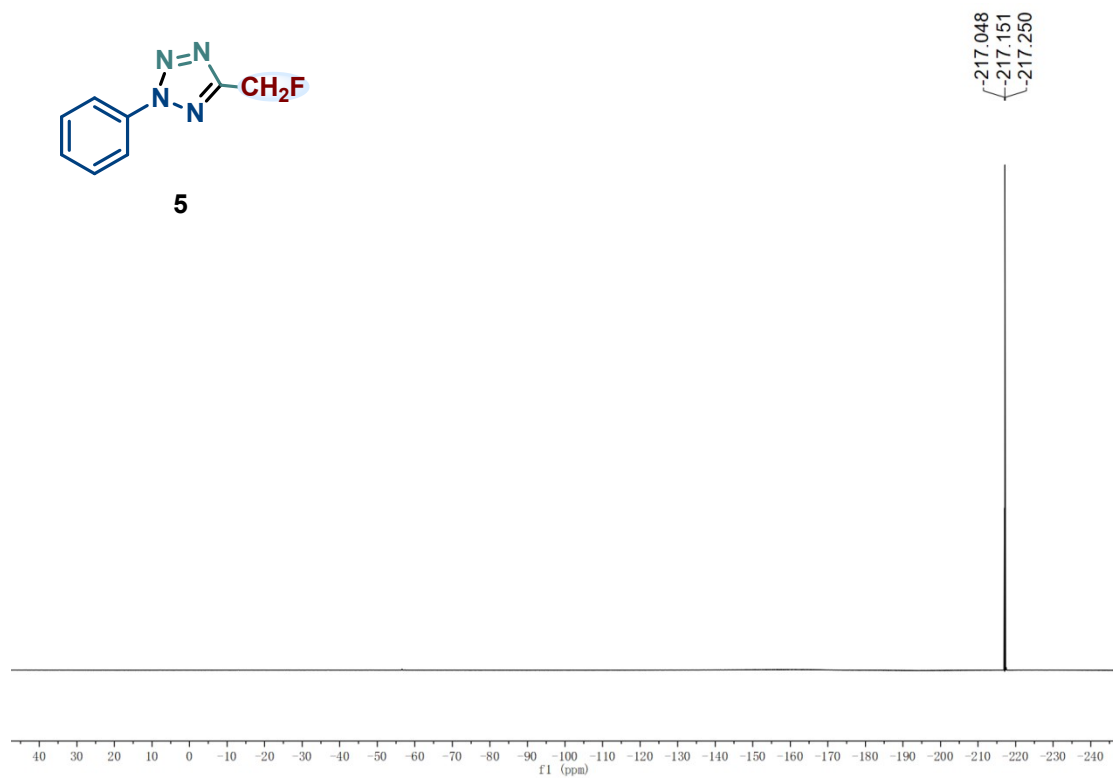

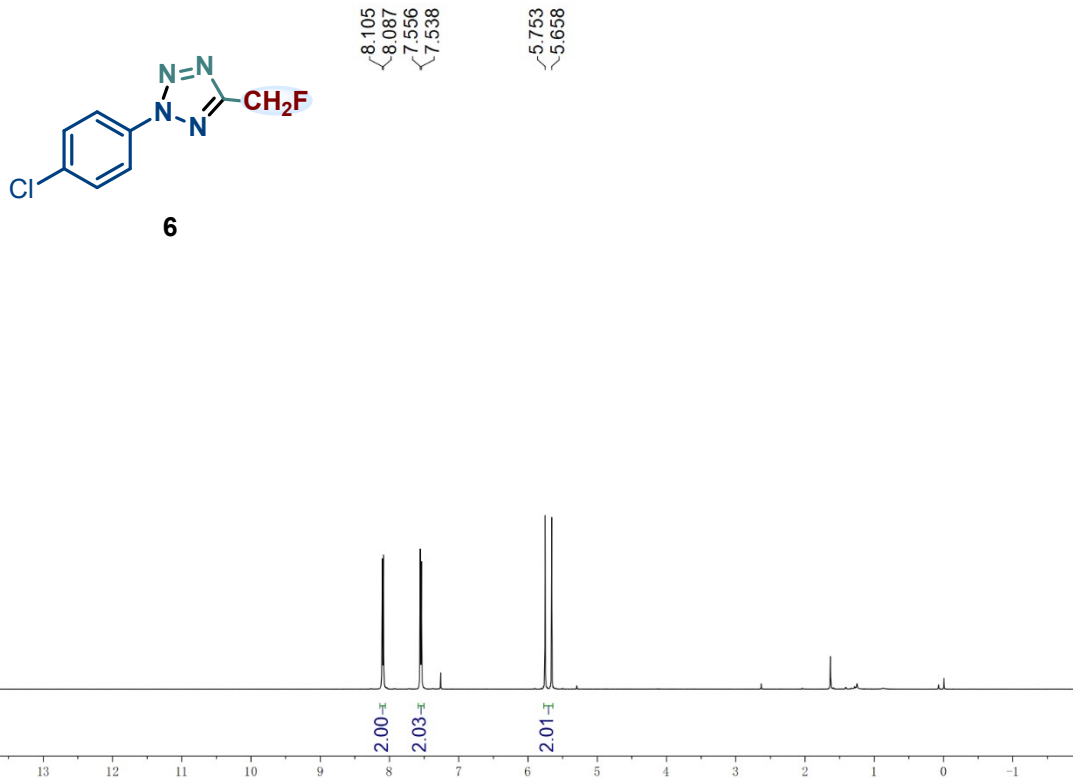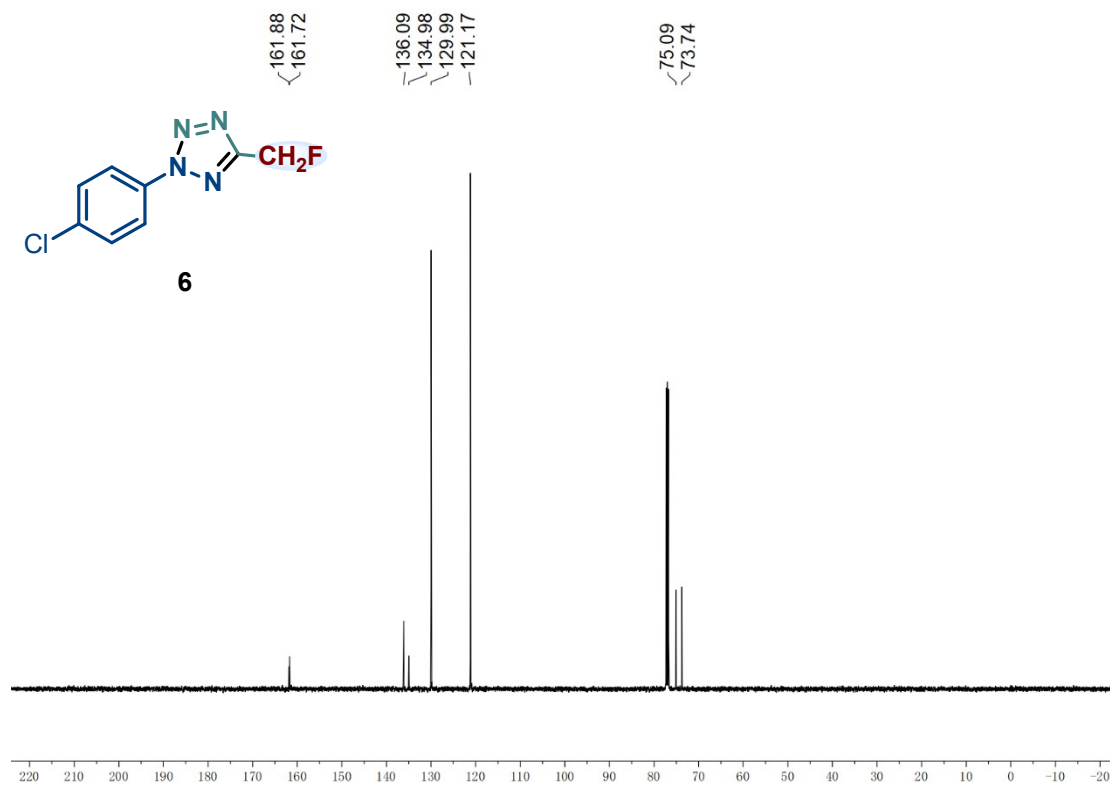

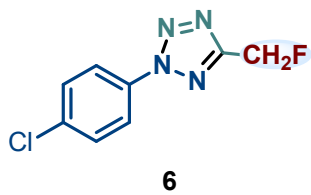

217.435  
217.518  
217.604

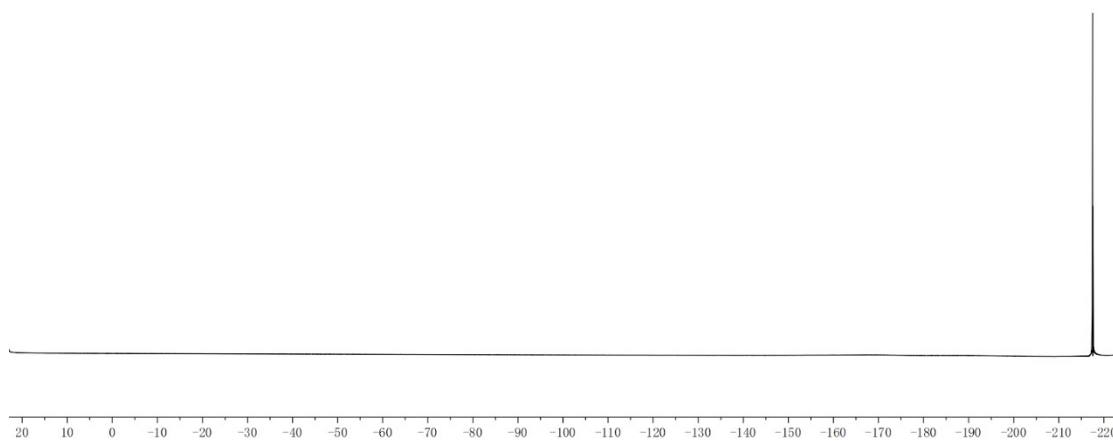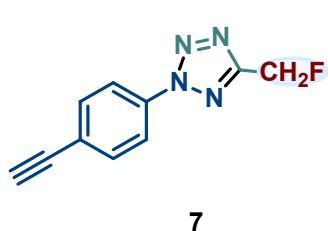

8.129  
8.112  
7.687  
7.670  
5.758  
5.663  
-3.233

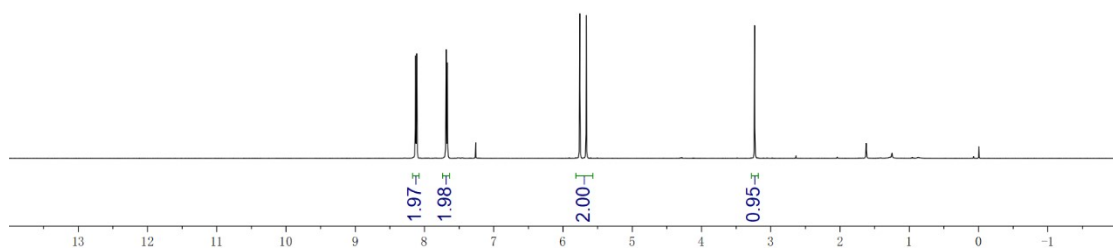

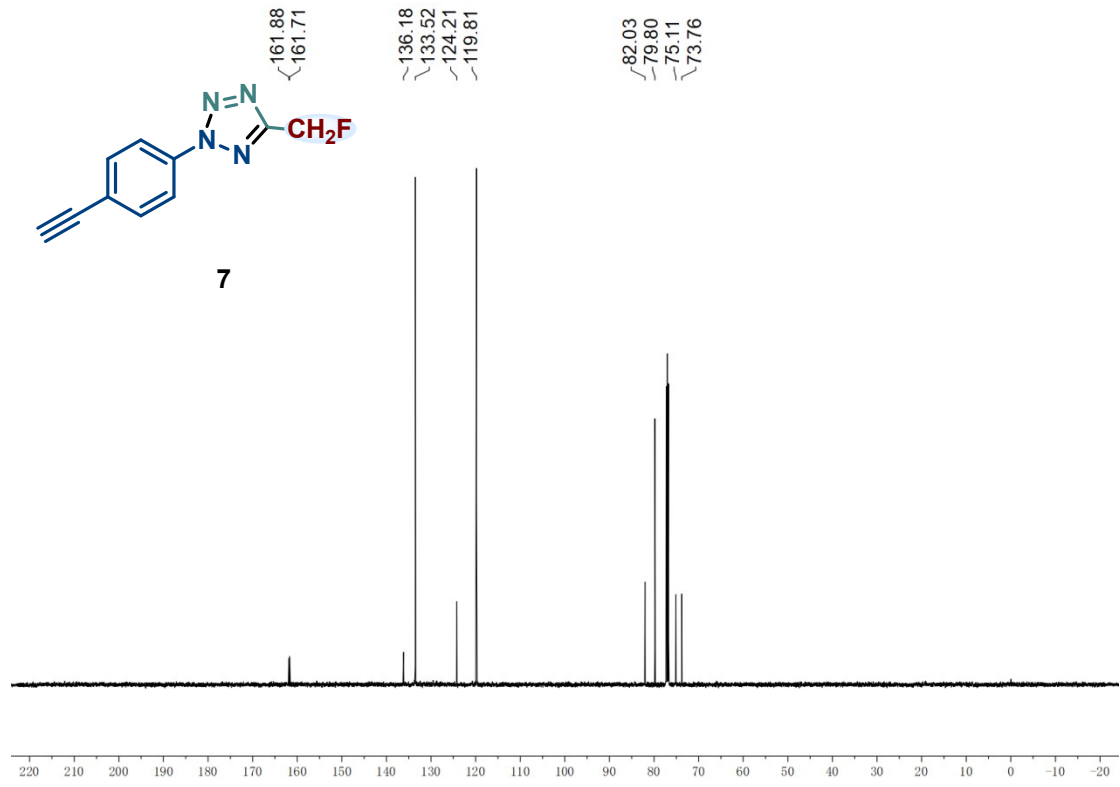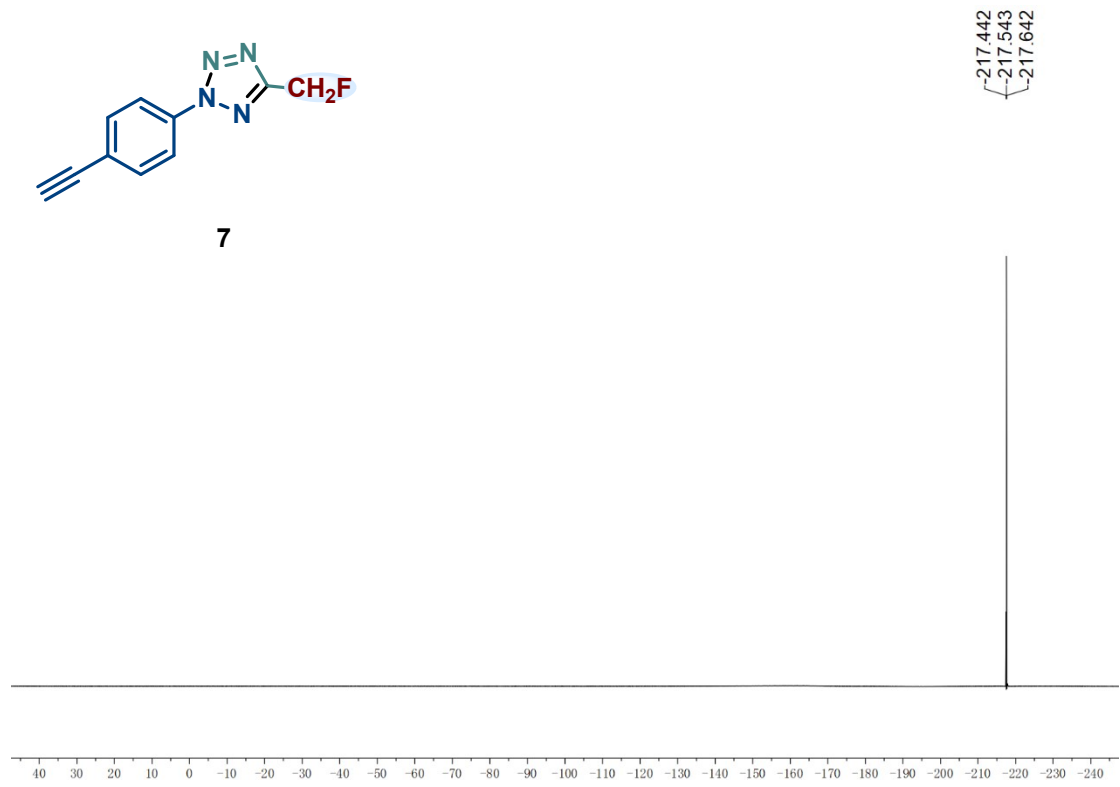



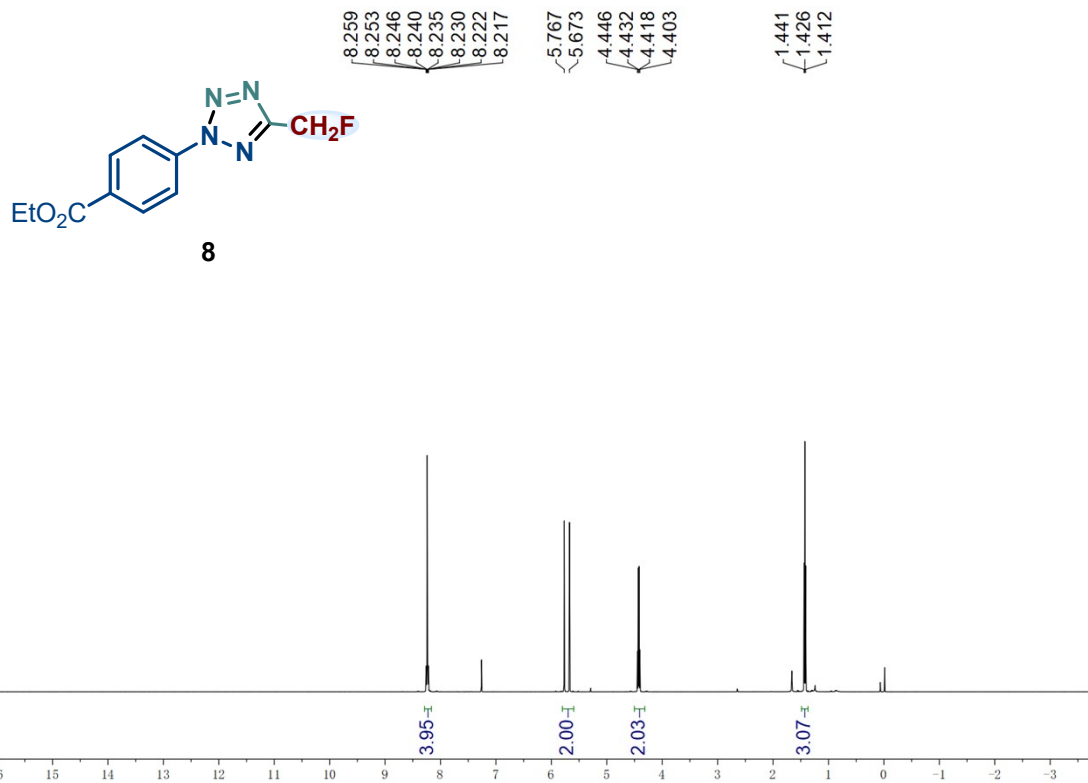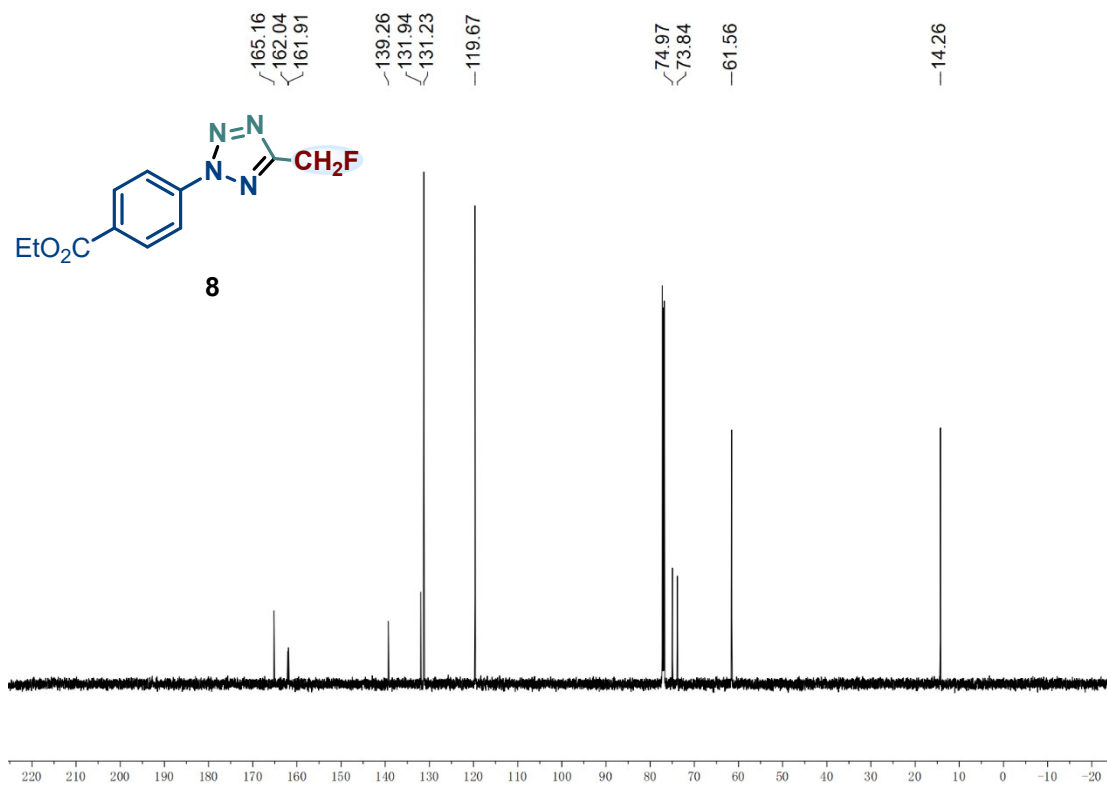

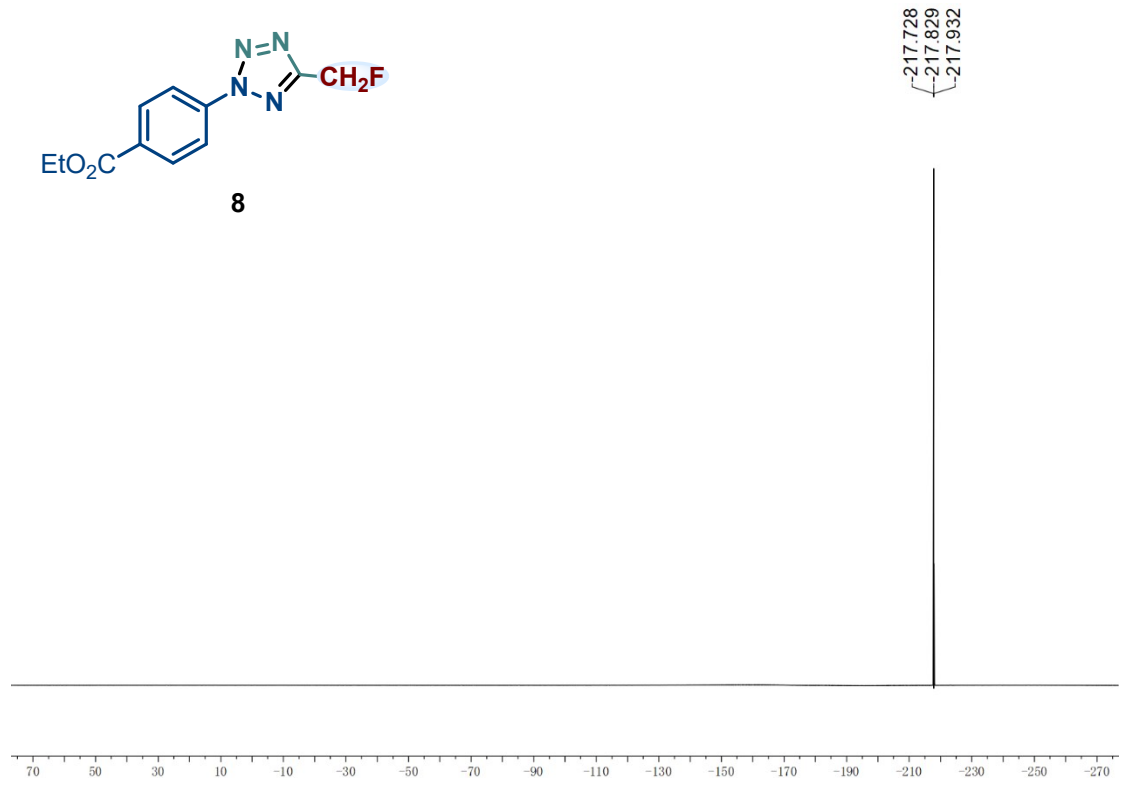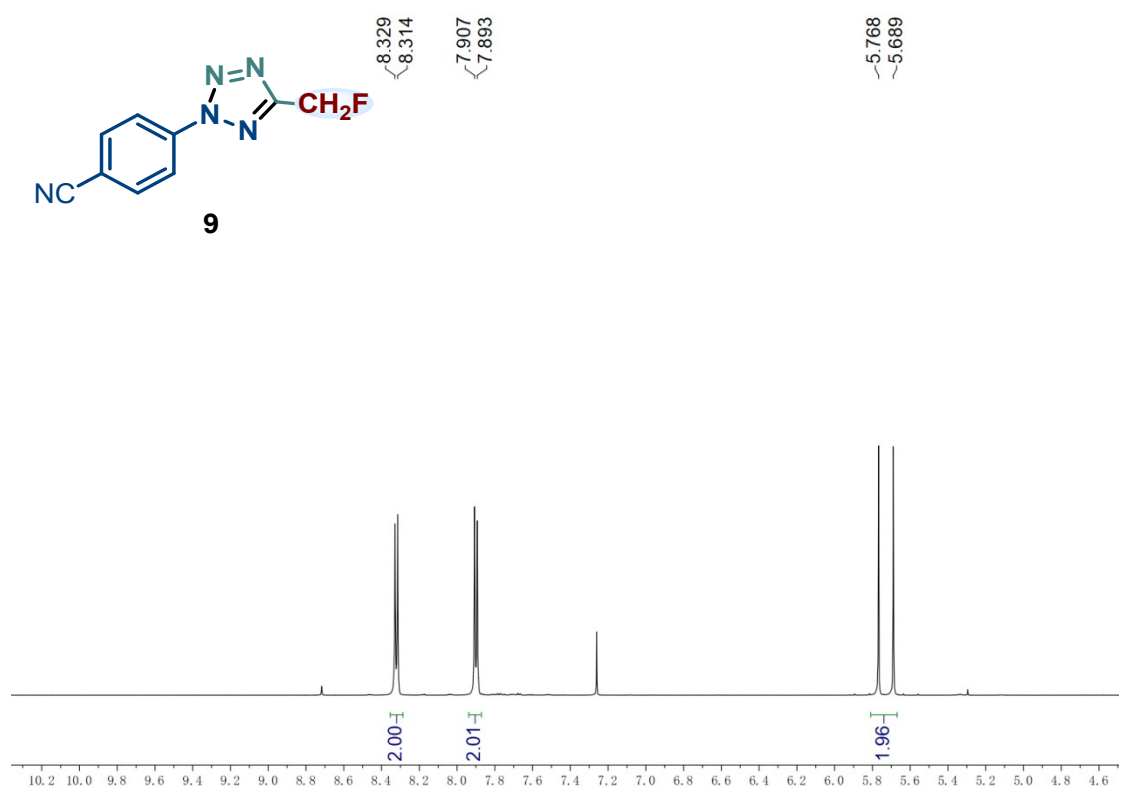

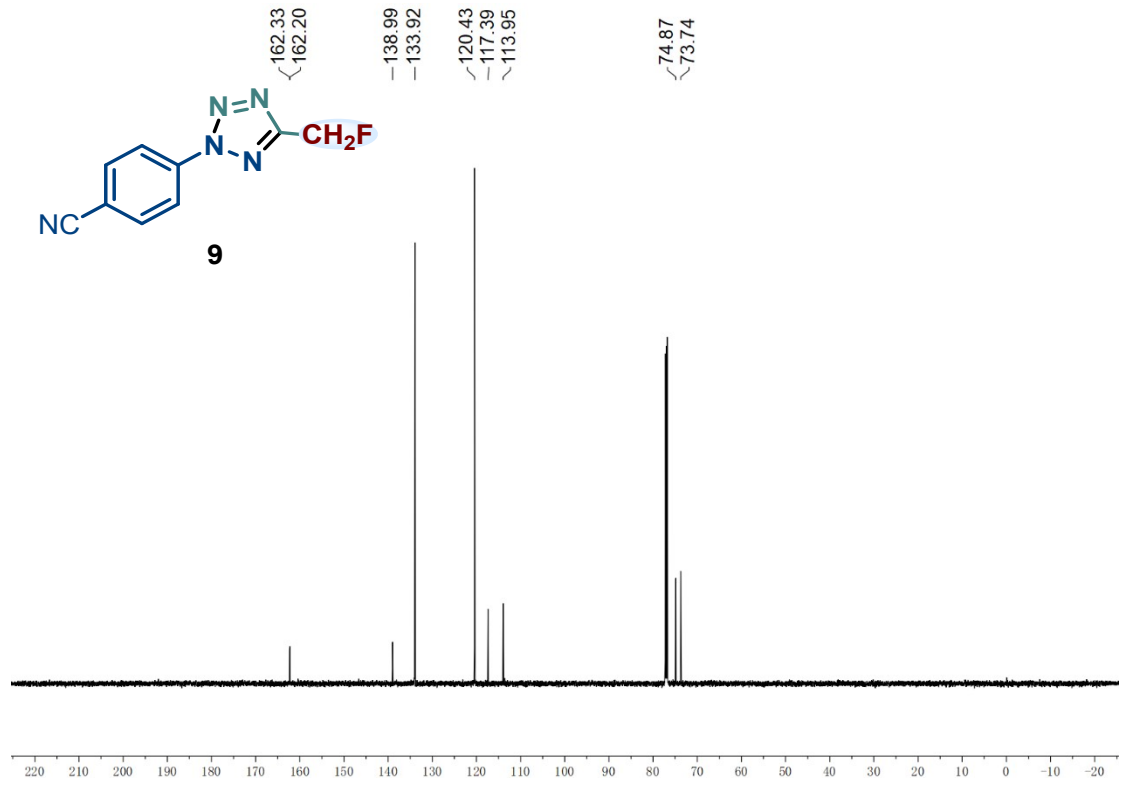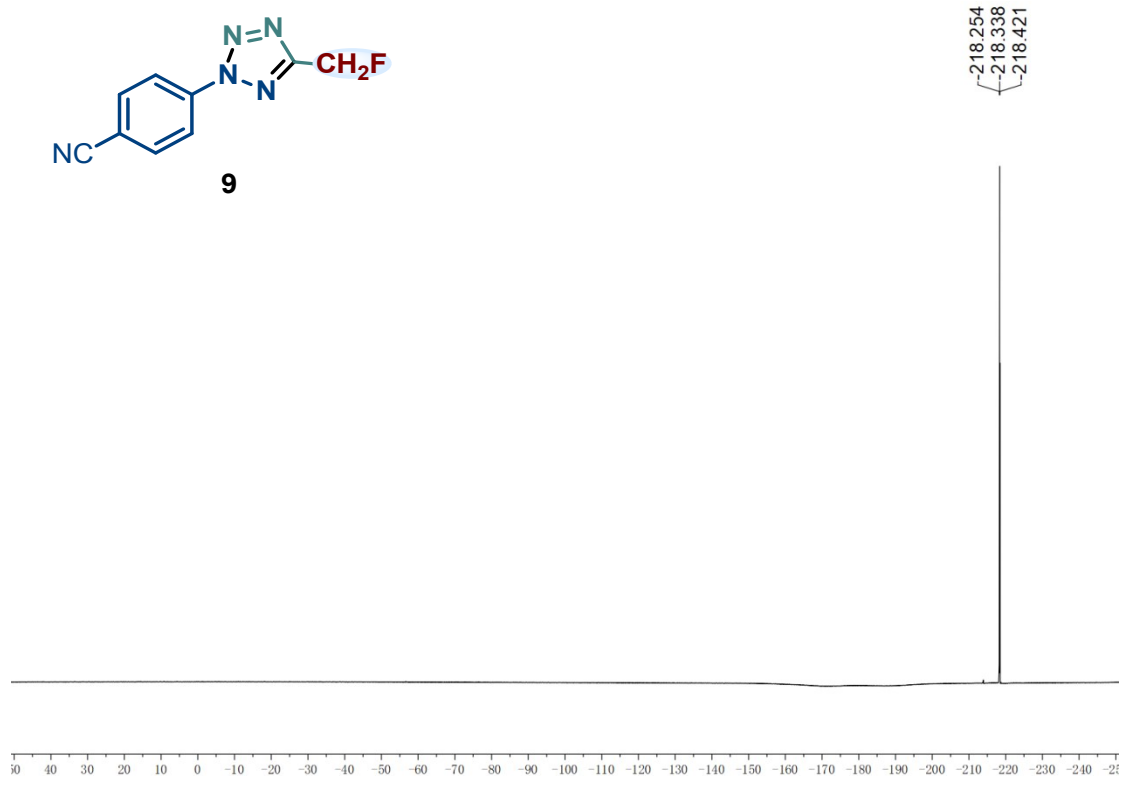

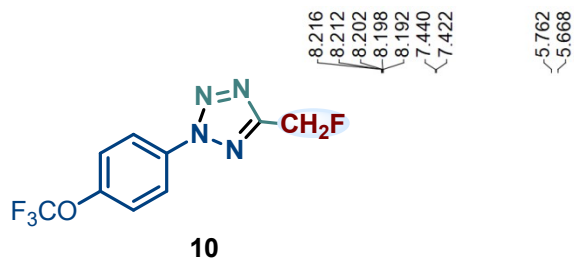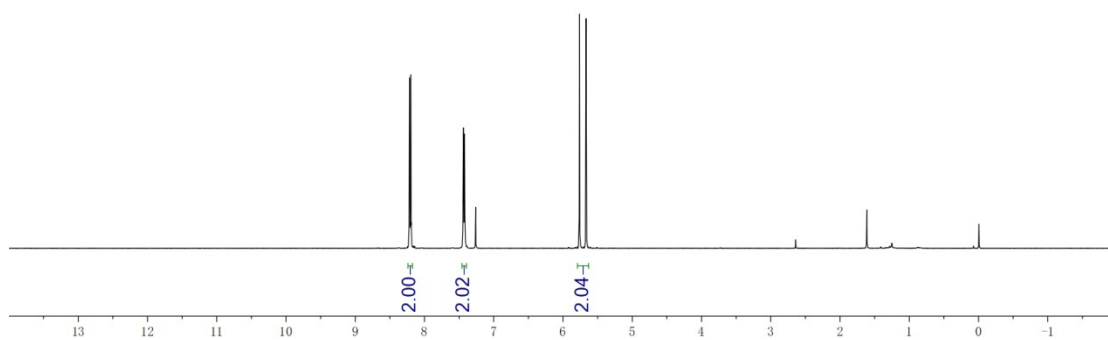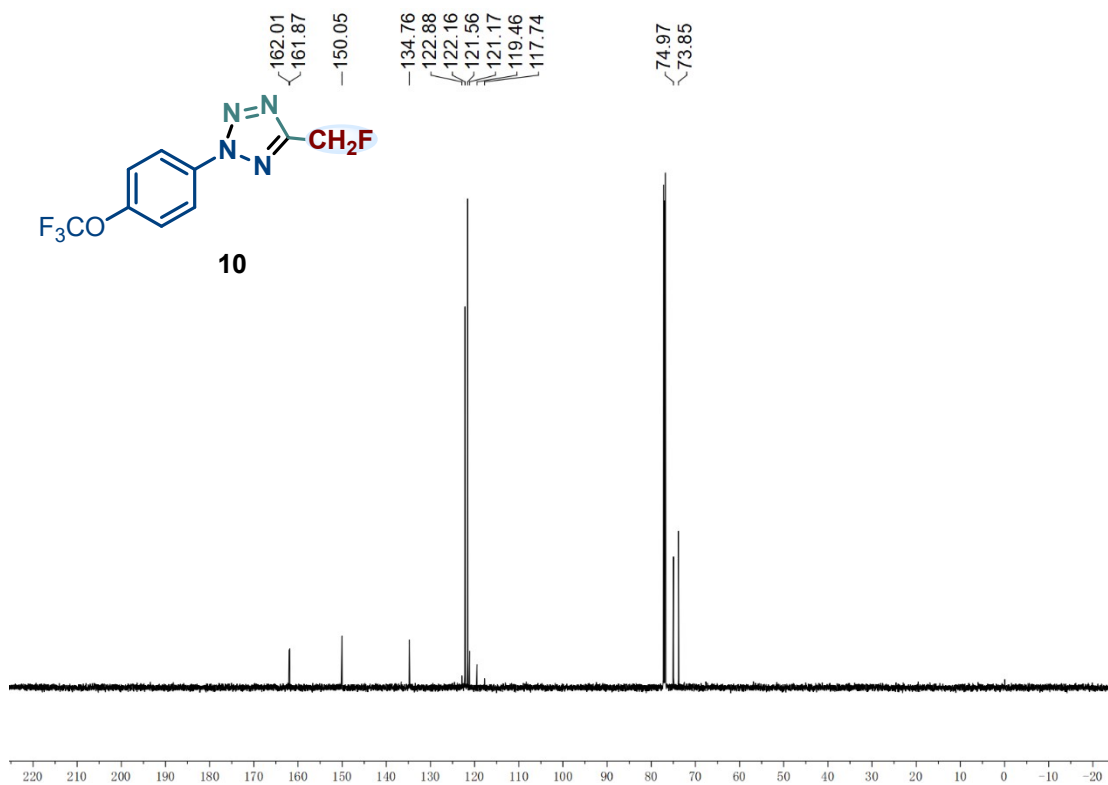

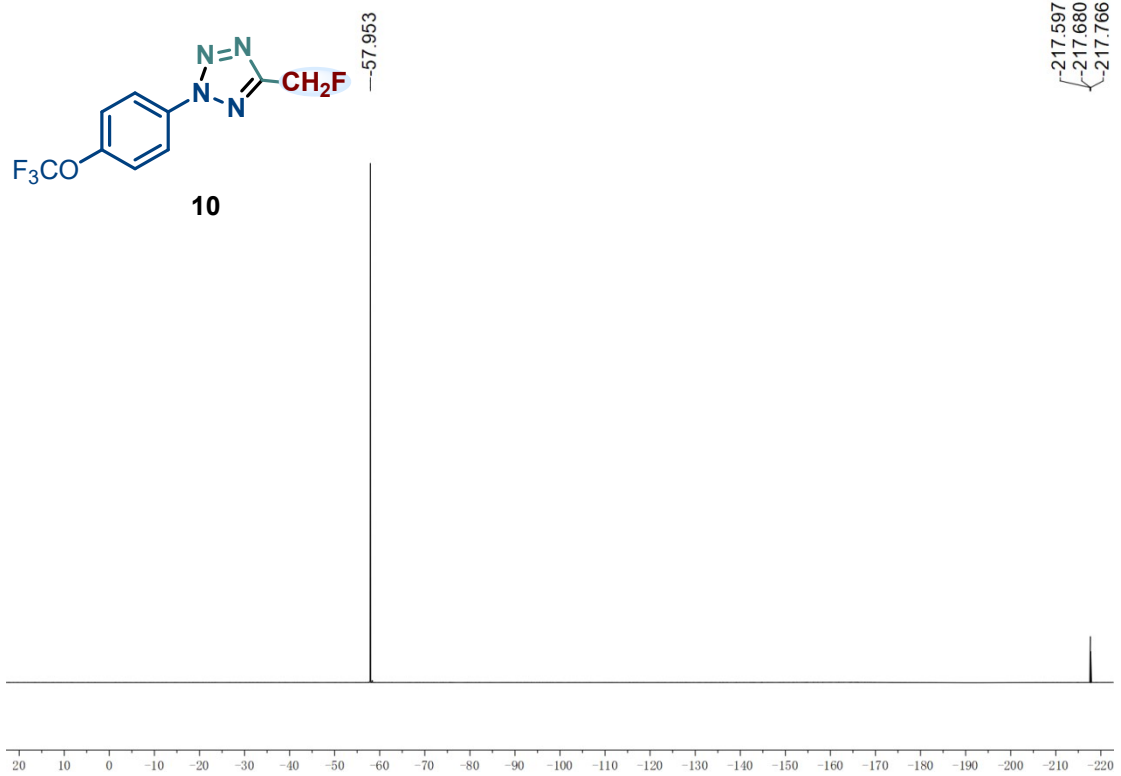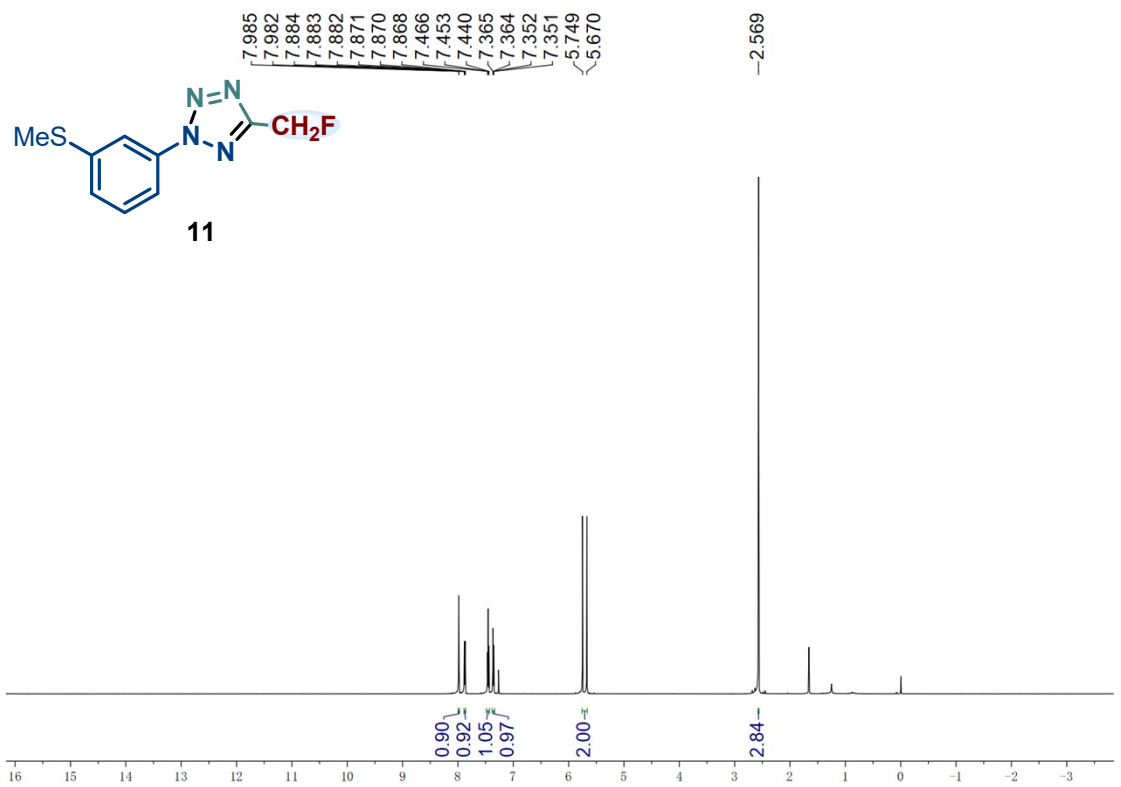

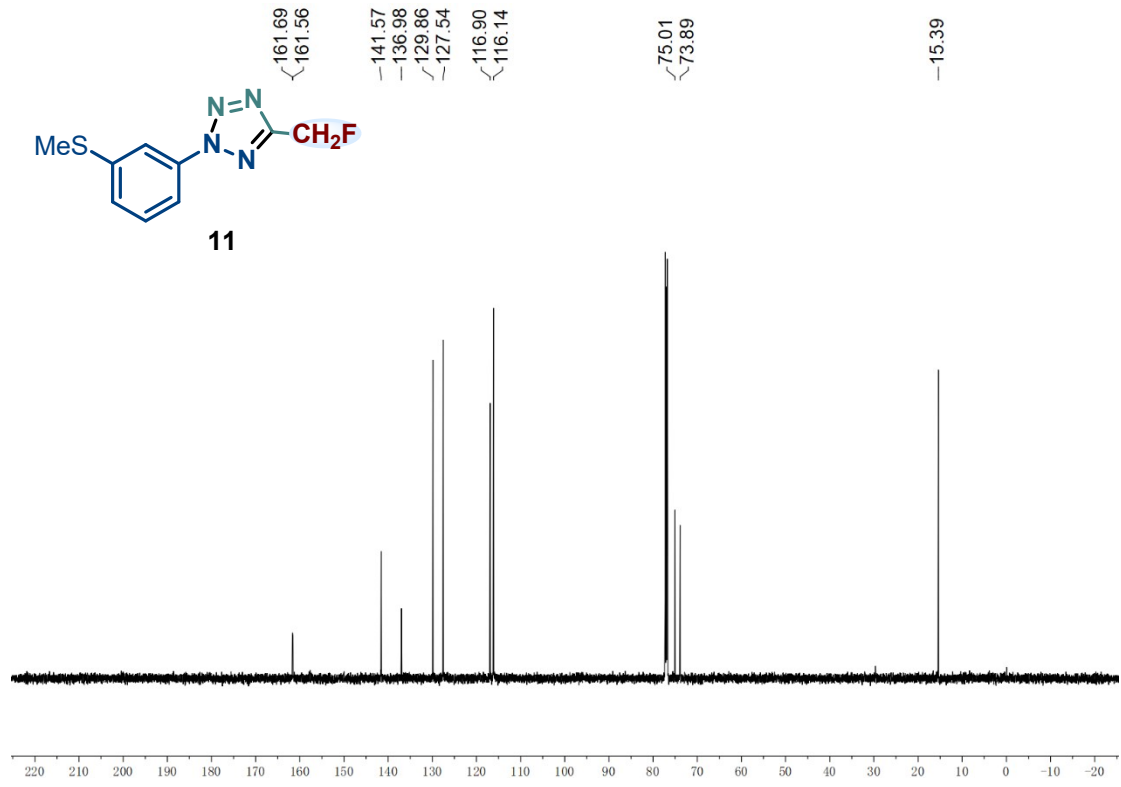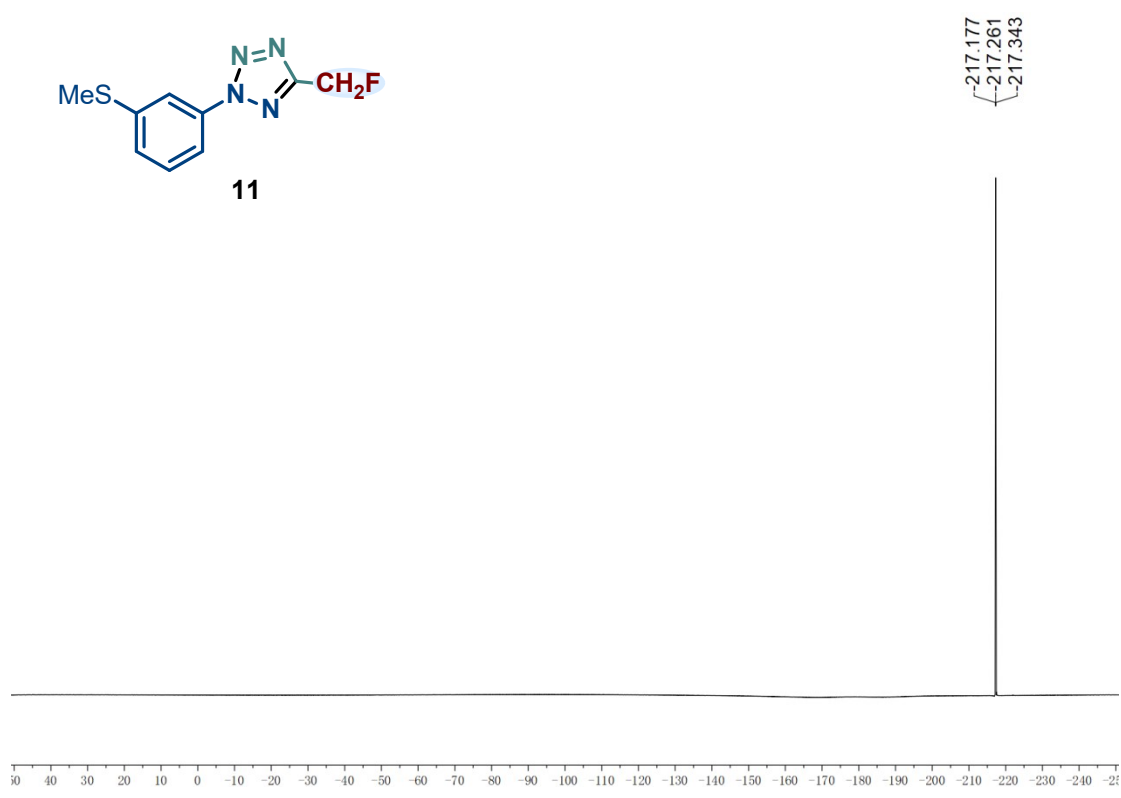

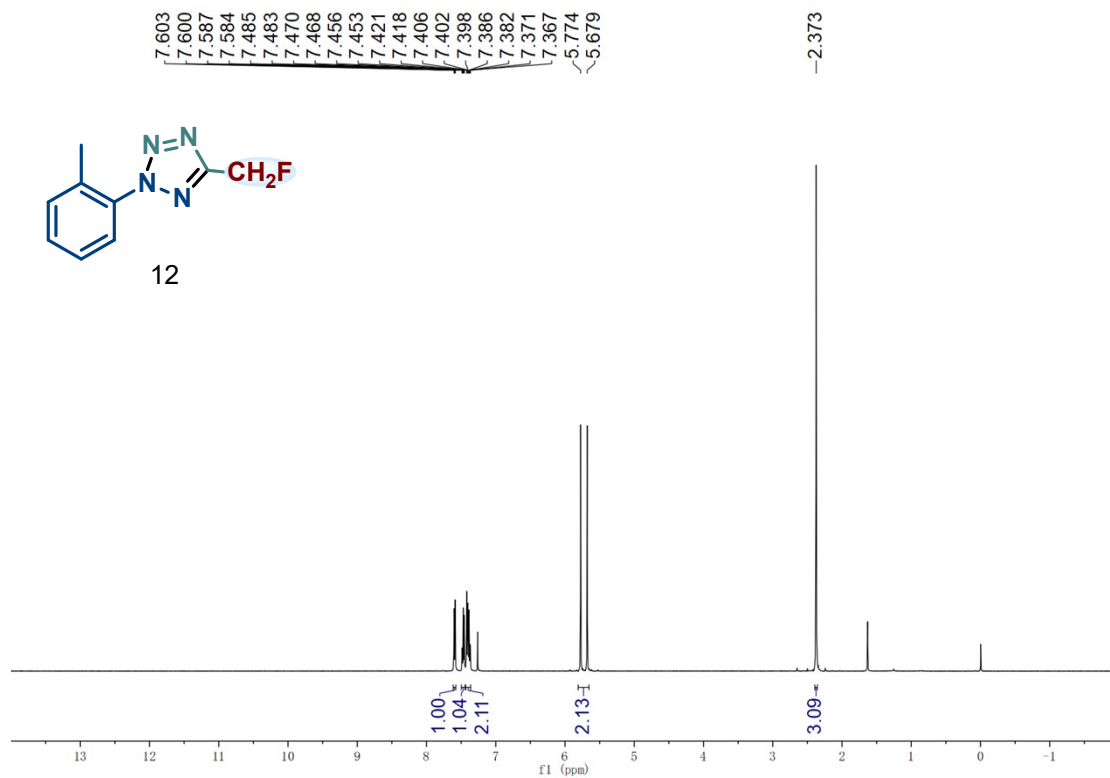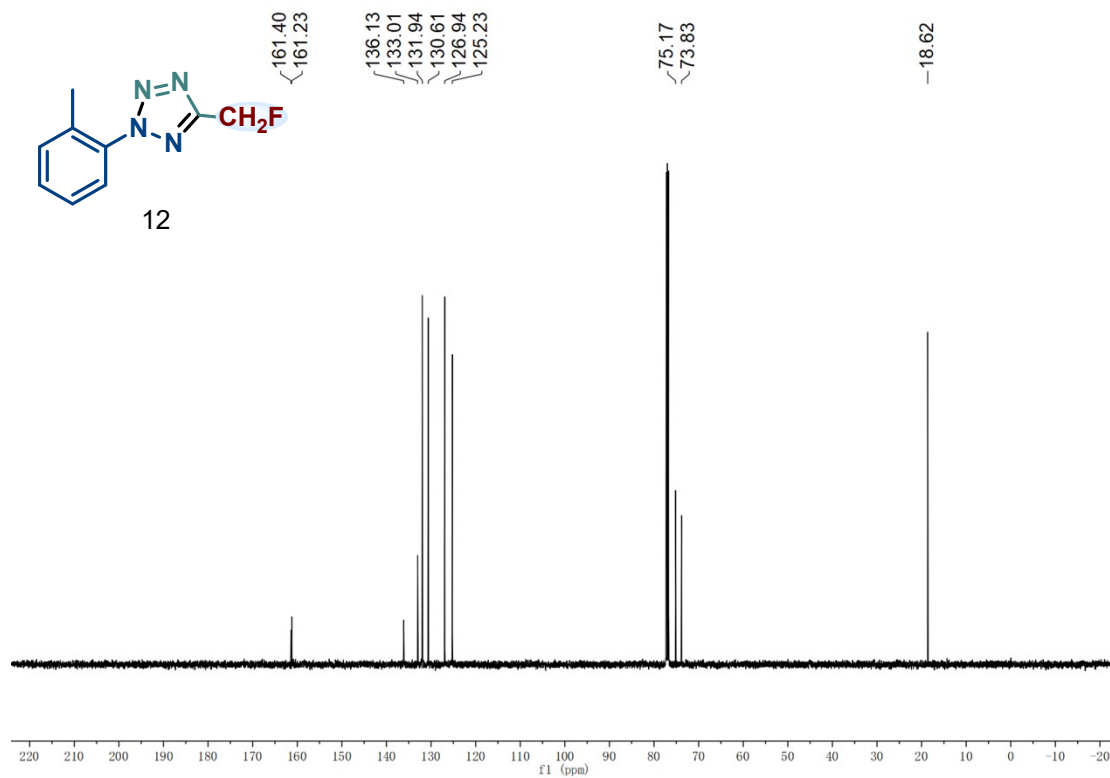

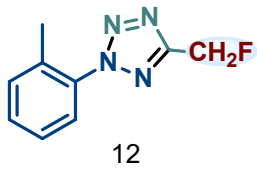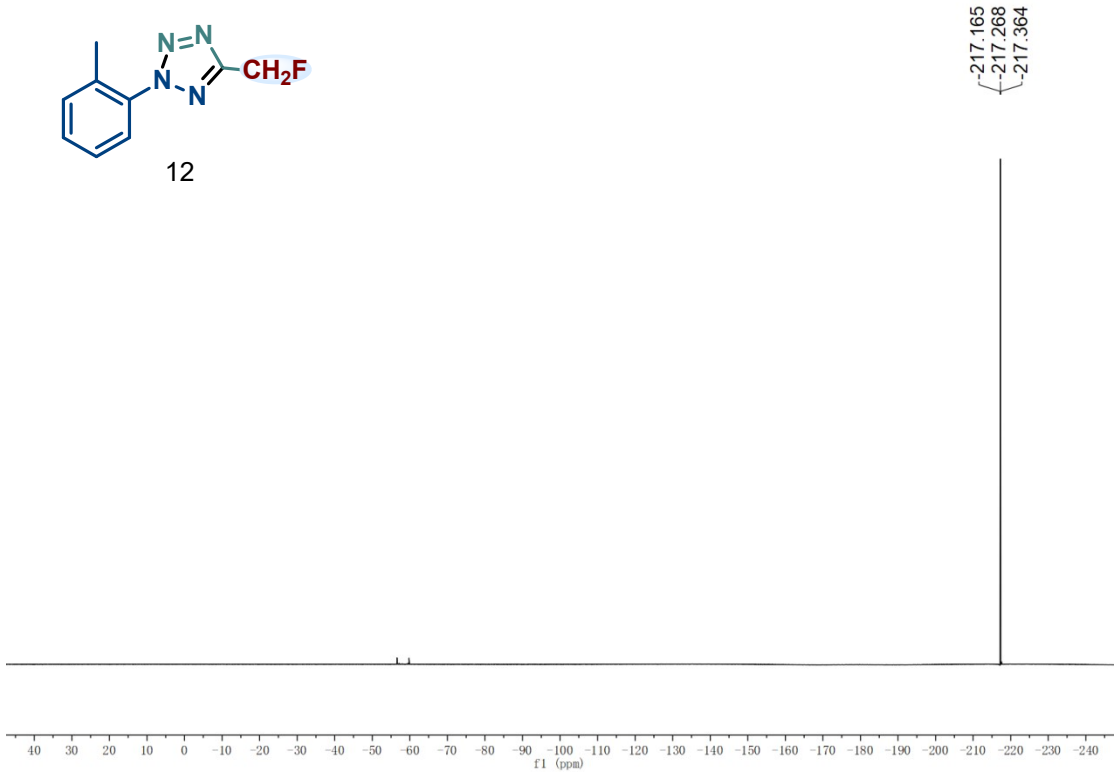

7.661  
 7.659  
 7.647  
 7.644  
 7.631  
 7.629  
 7.615  
 7.613  
 7.593  
 7.591  
 7.578  
 7.575  
 7.573  
 7.570  
 7.557  
 7.555  
 7.272  
 7.269  
 7.263  
 7.262  
 7.258  
 7.060  
 7.056  
 7.049  
 7.046  
 5.804  
 5.510

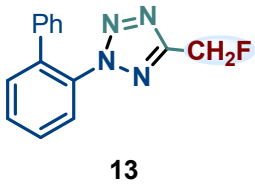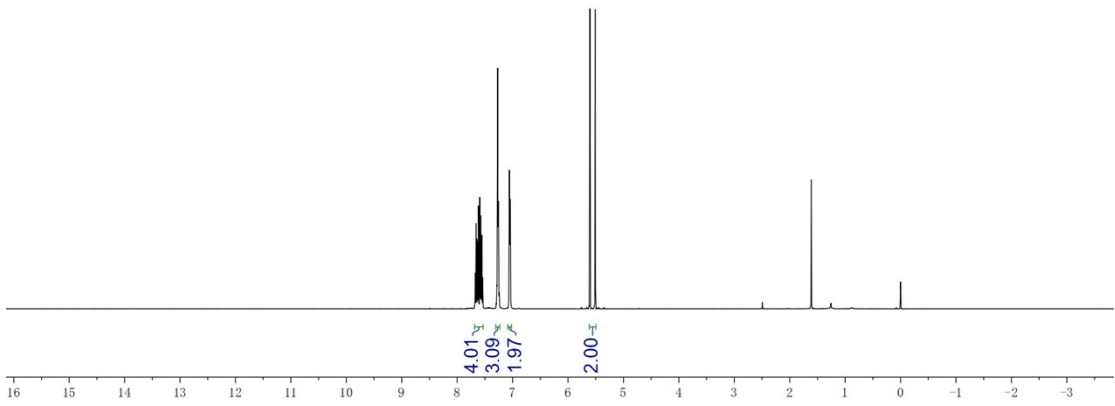



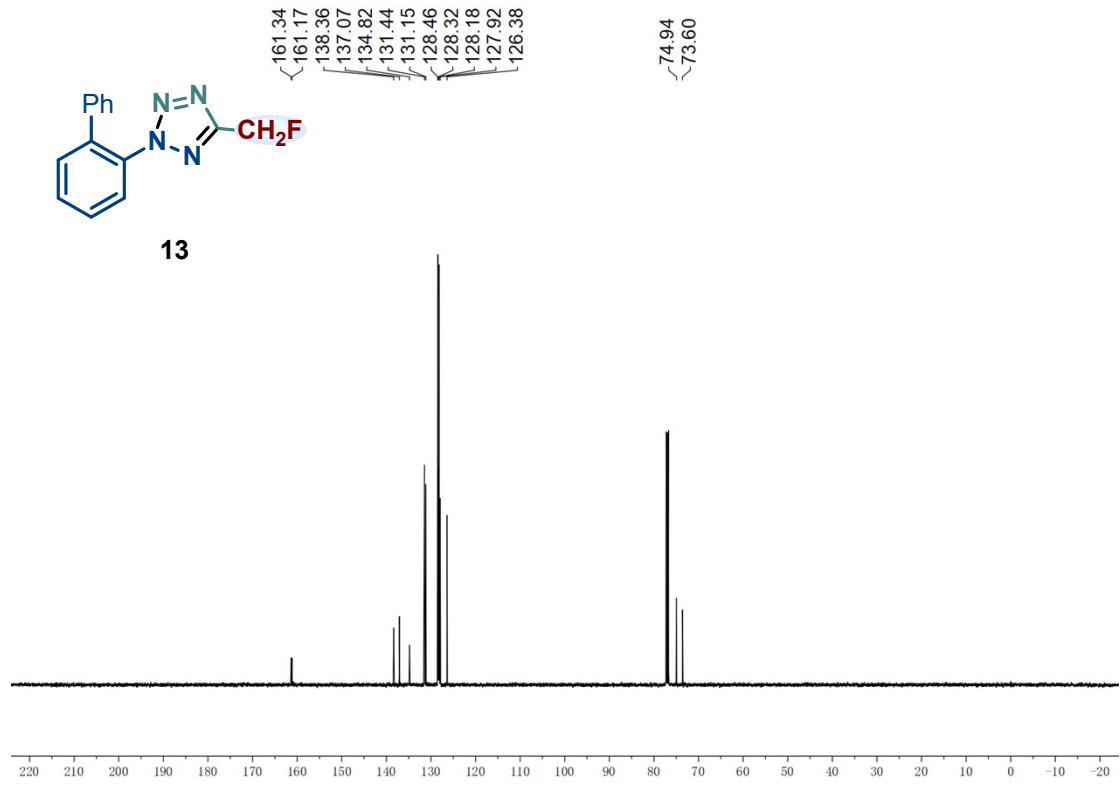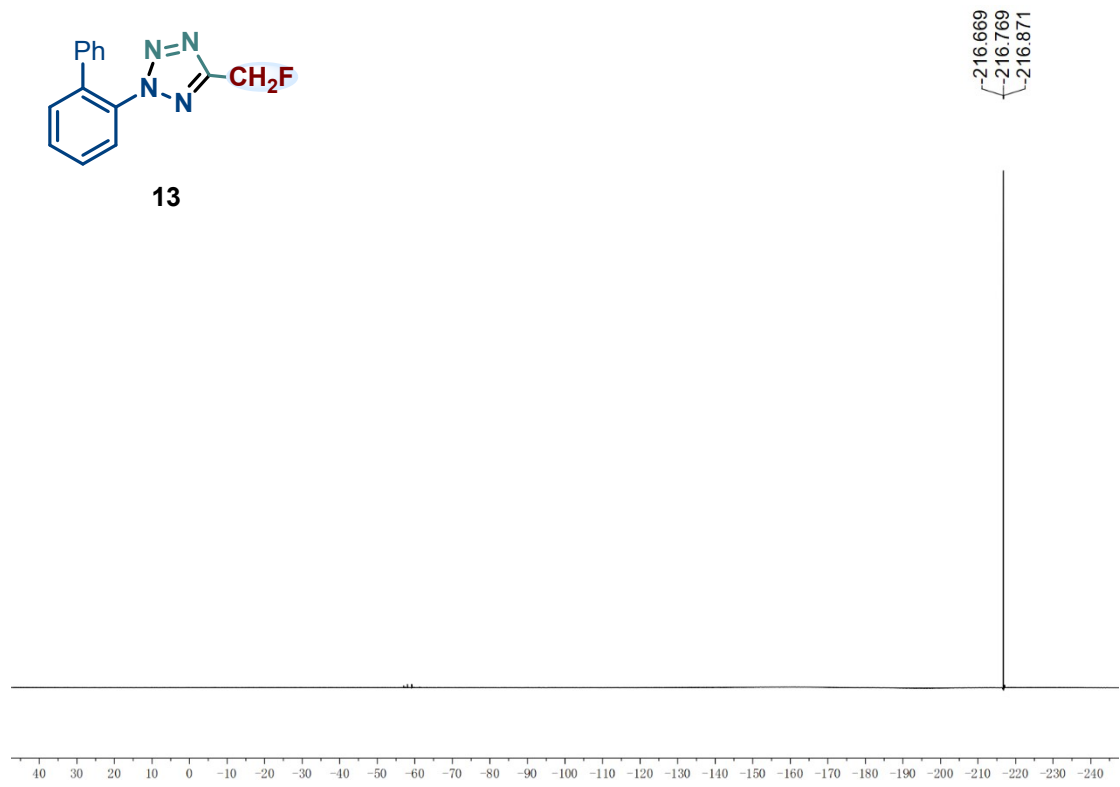

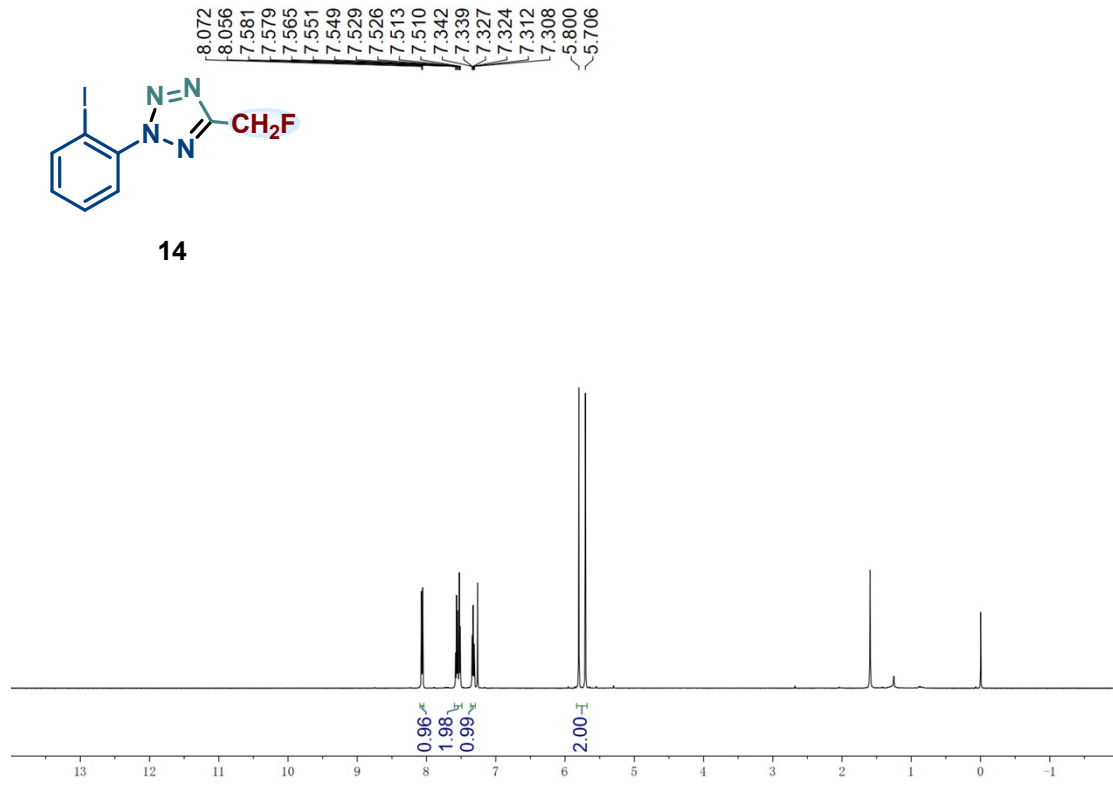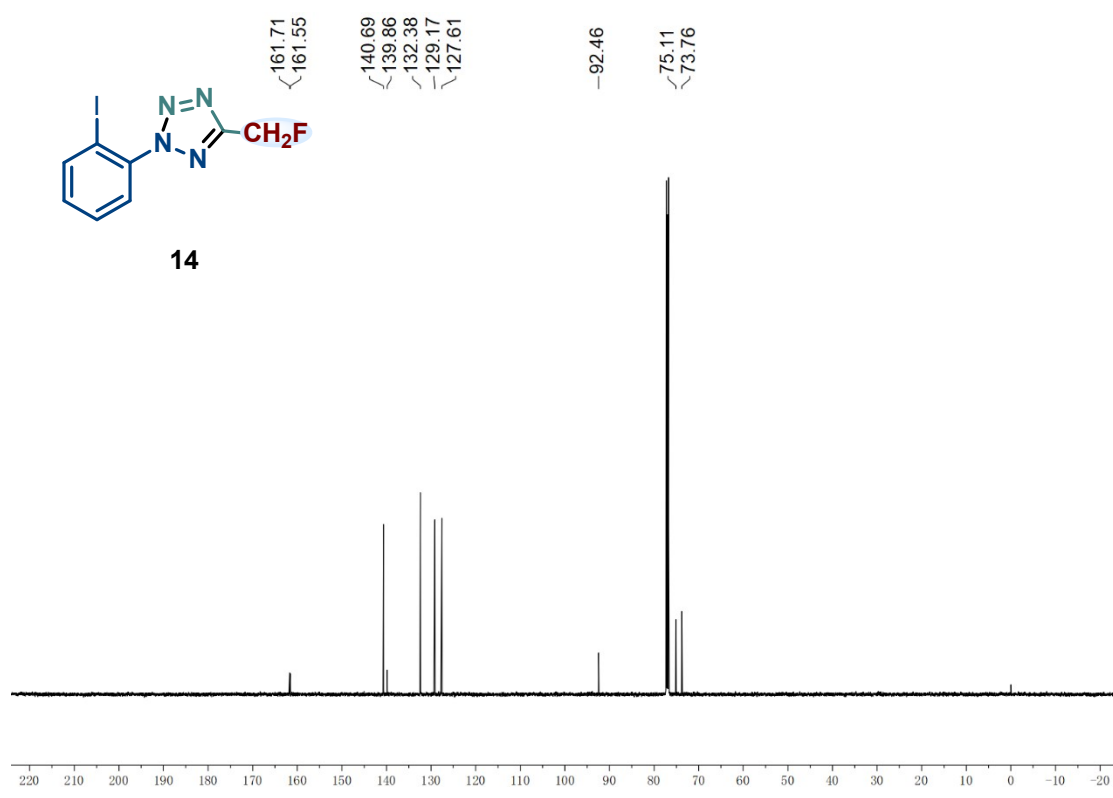

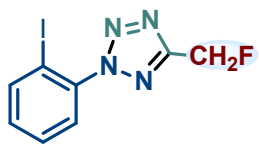

14

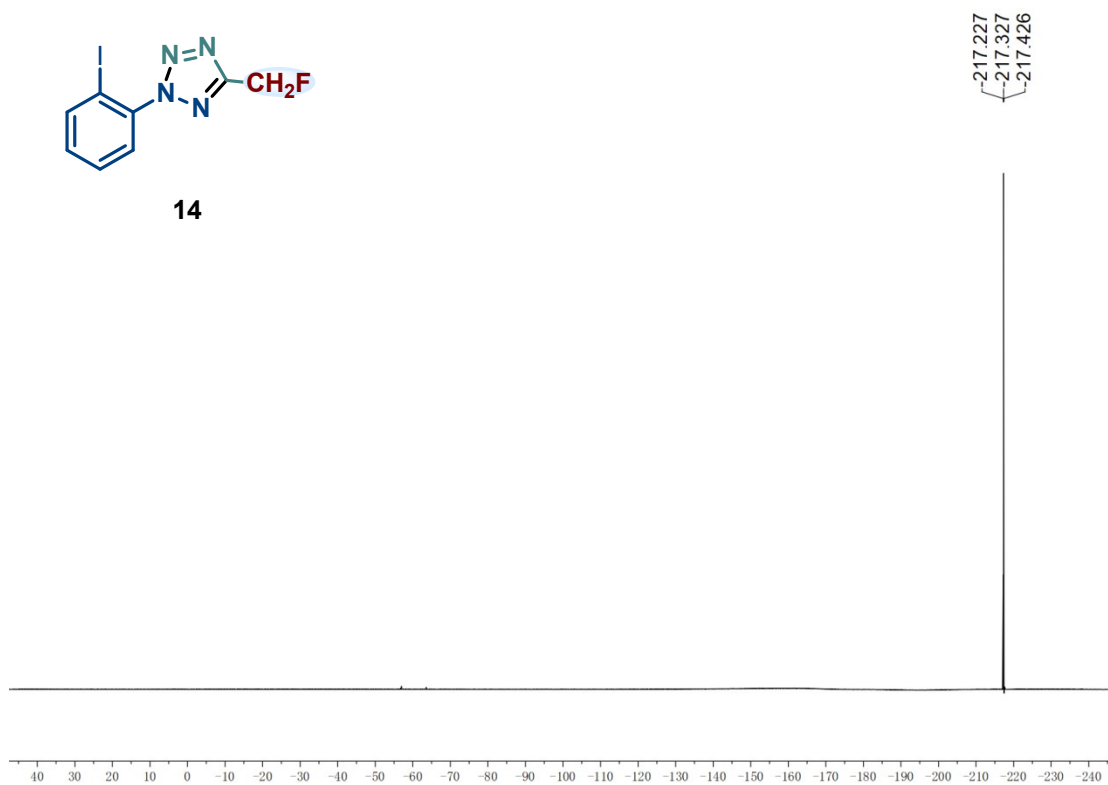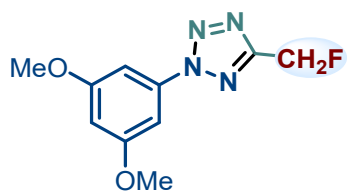

15

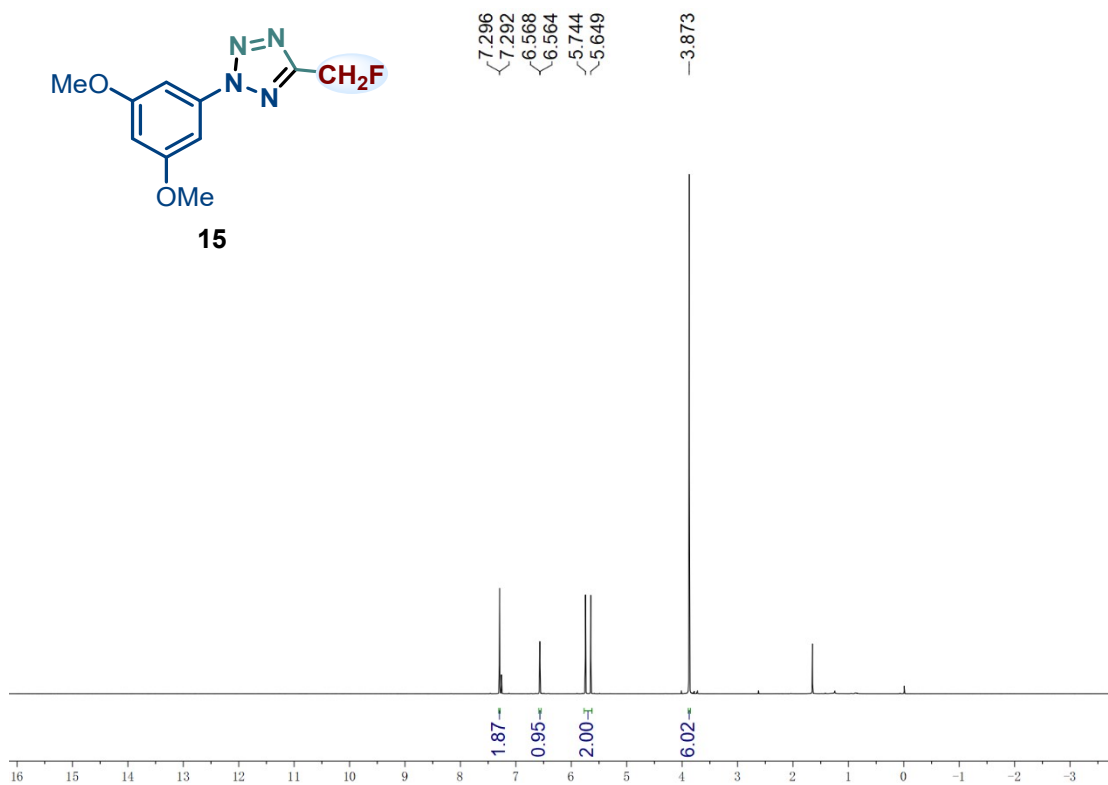

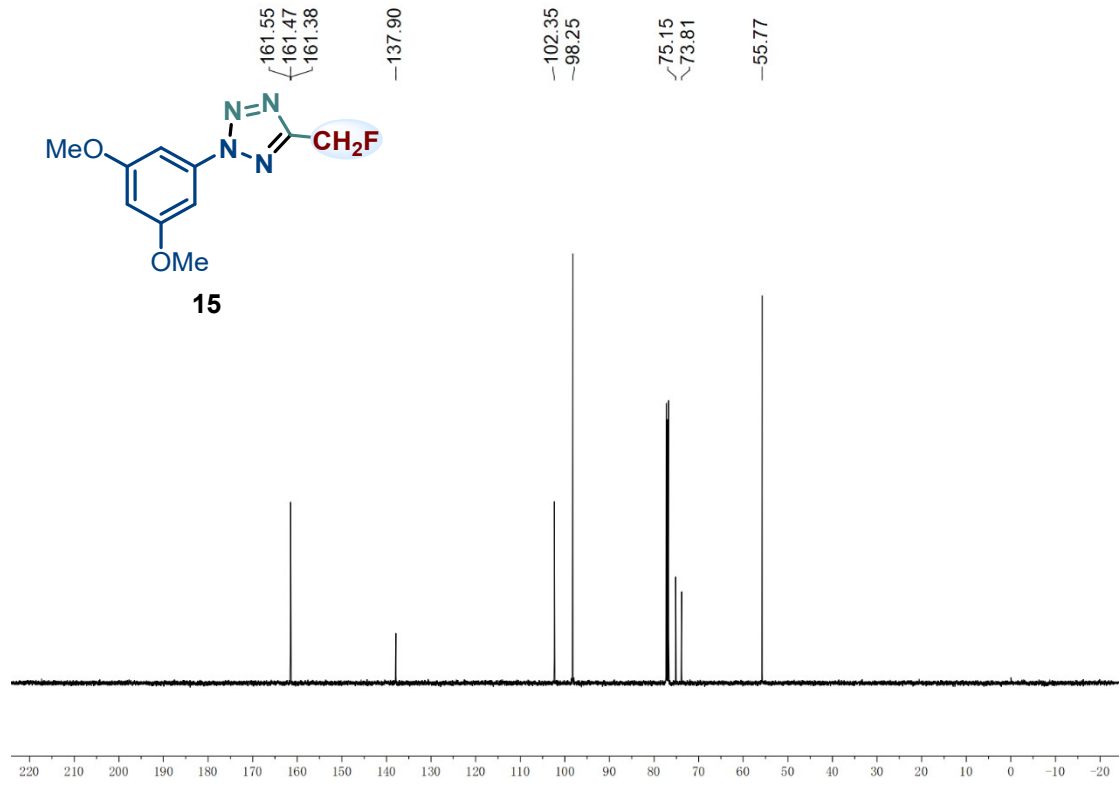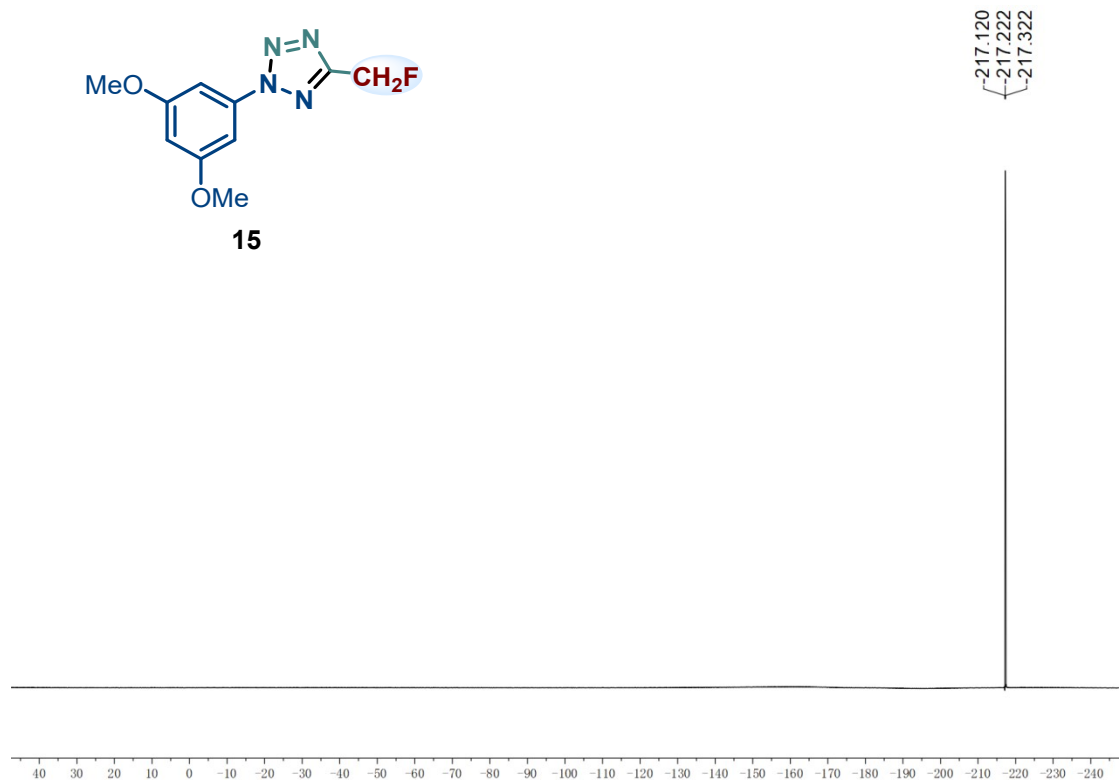

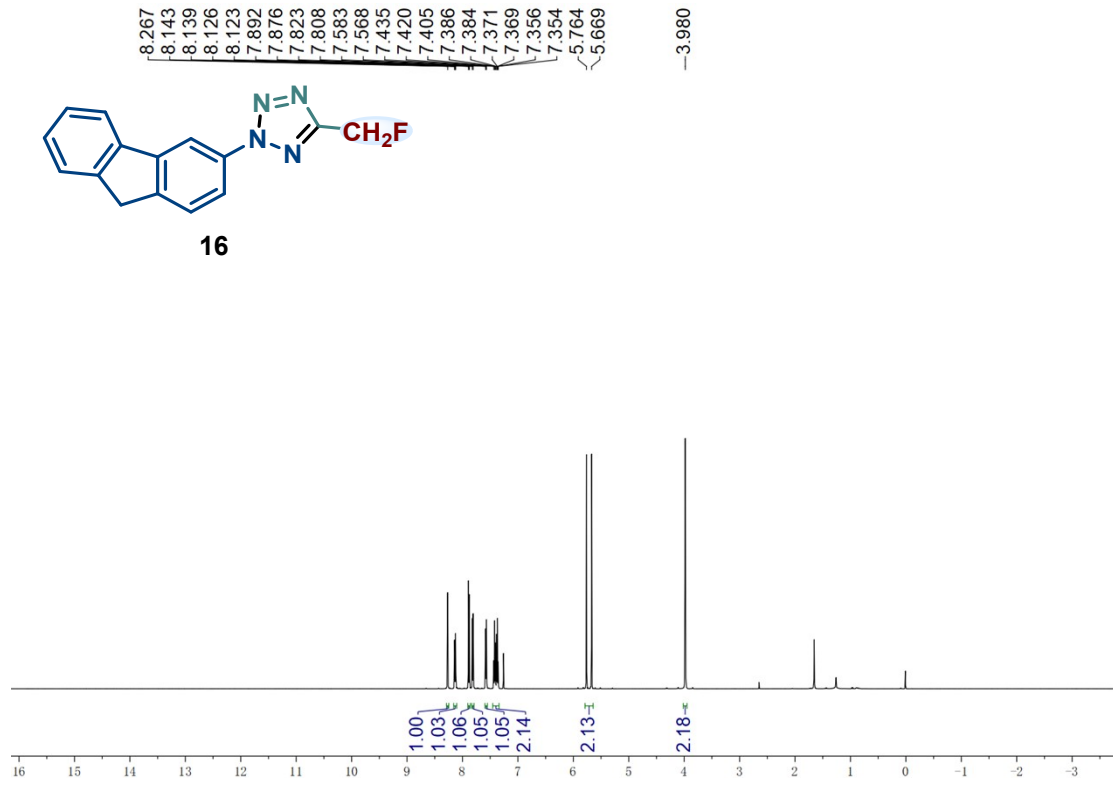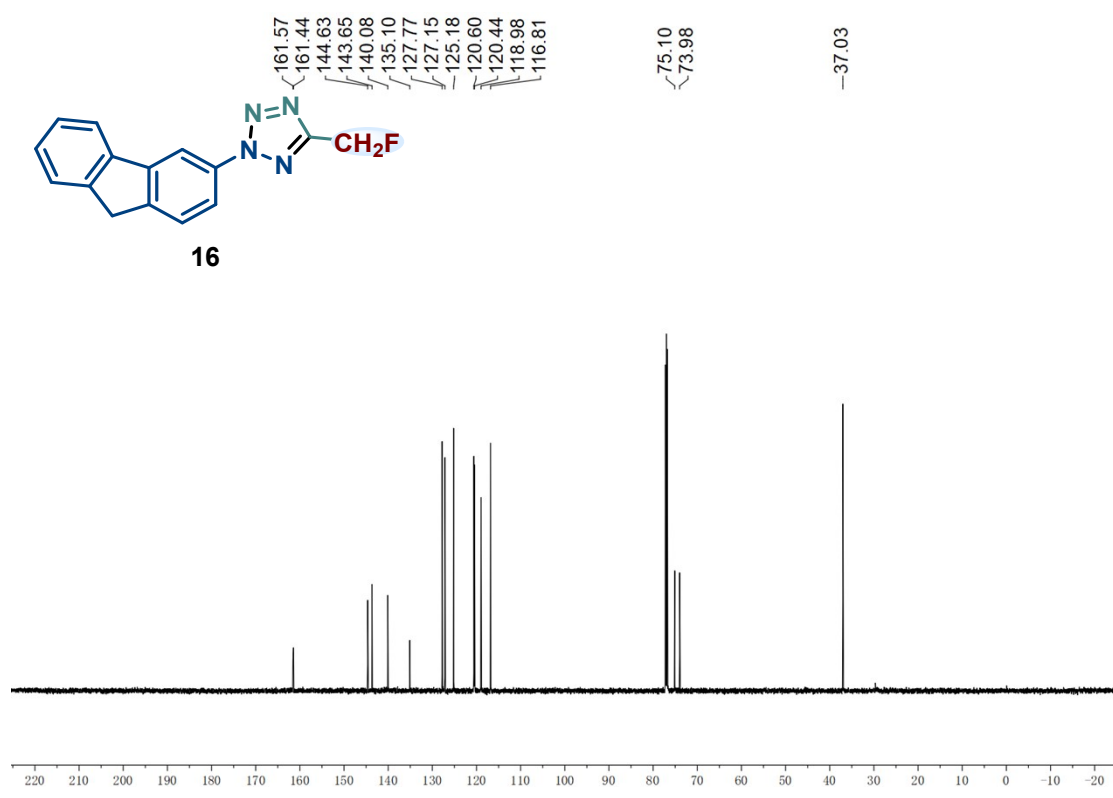

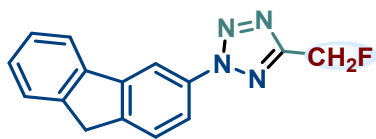

16

216.917  
217.002  
217.087

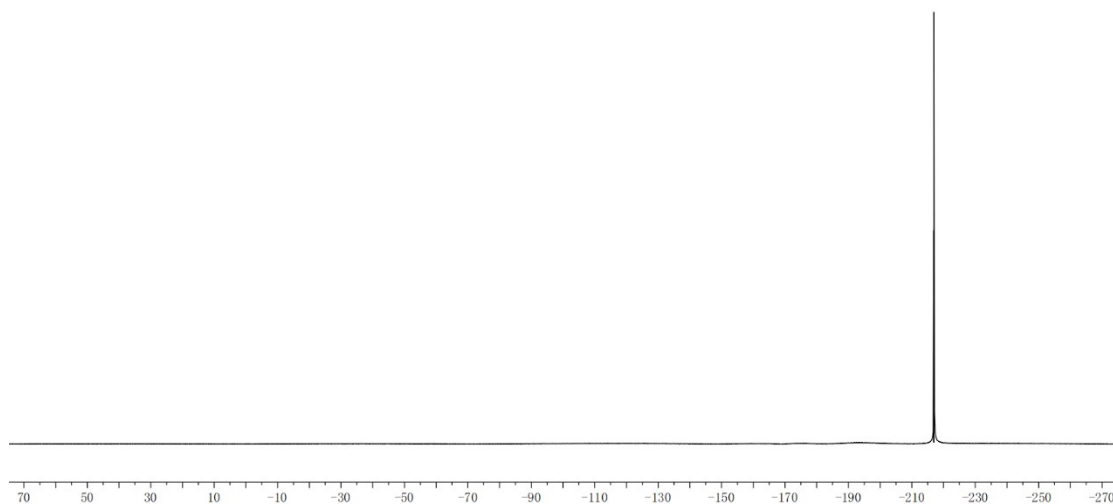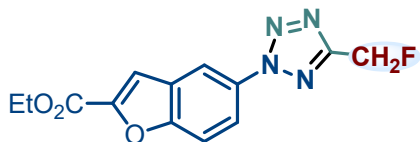

17

8.460  
8.456  
8.266  
8.261  
8.248  
8.243  
7.771  
7.753  
7.620  
7.619  
7.261  
5.770  
5.675  
4.495  
4.481  
4.467  
4.453

1.461  
1.447  
1.433

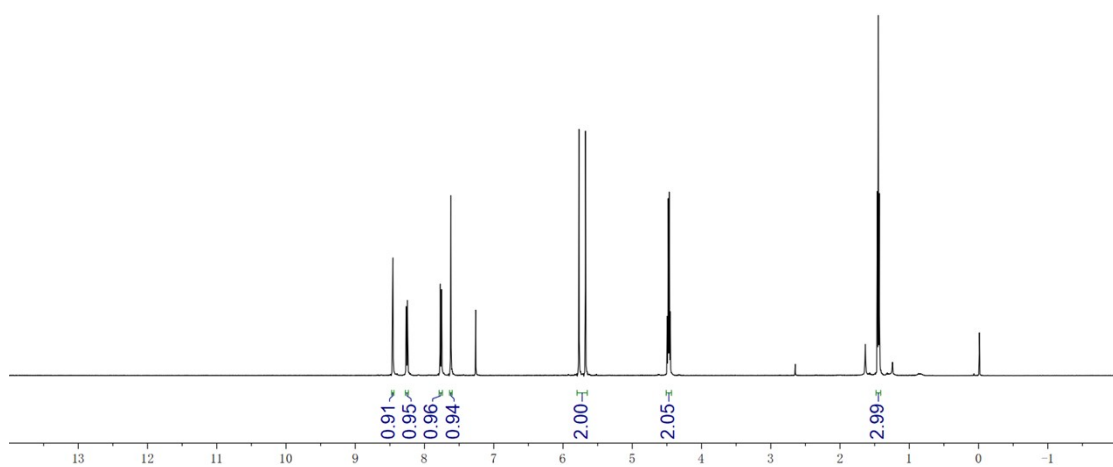

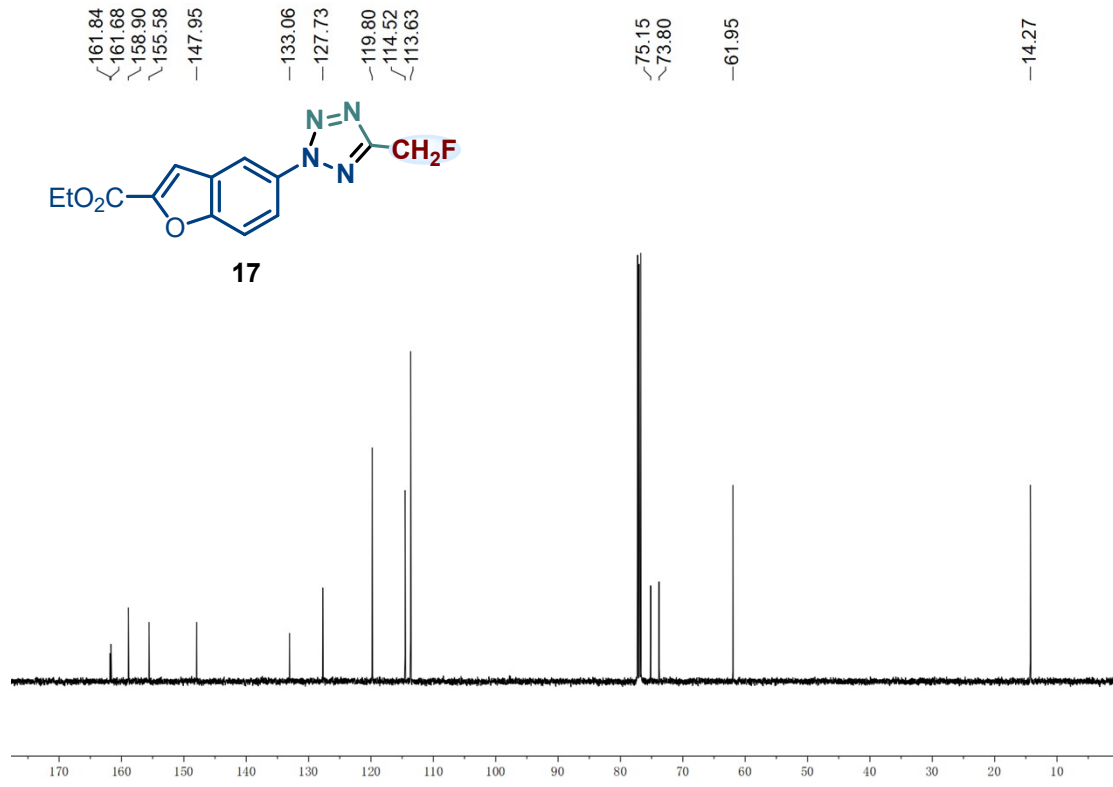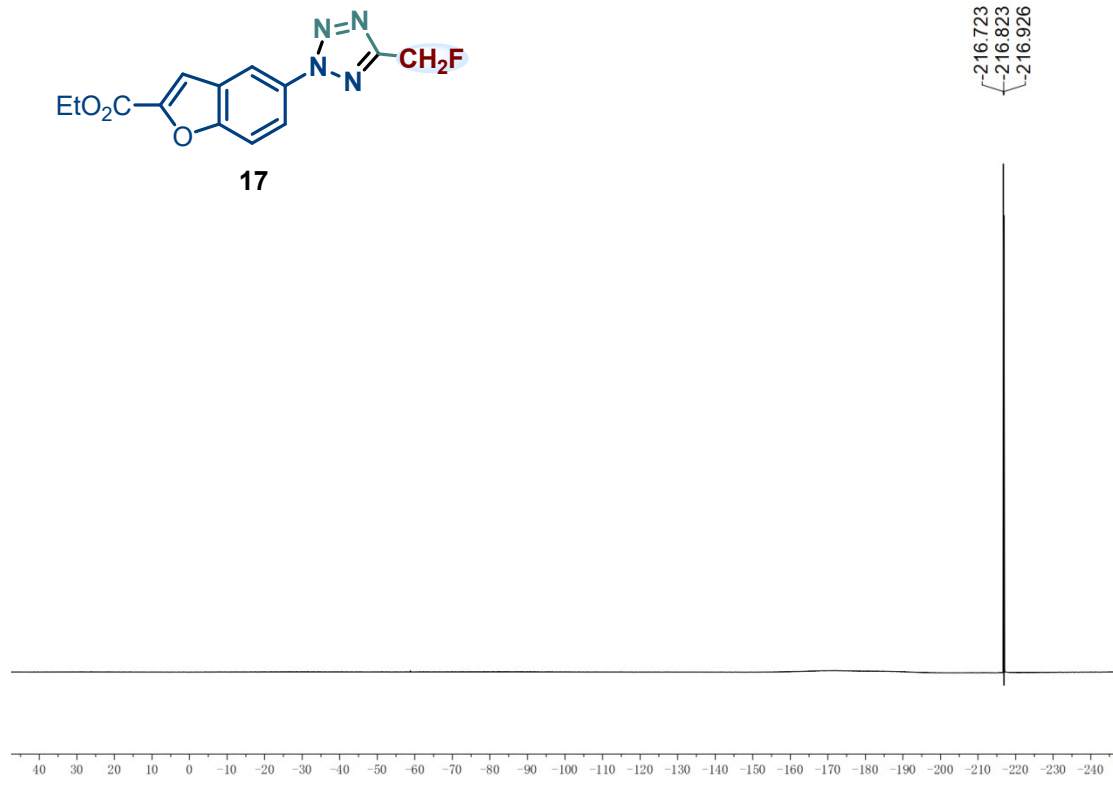

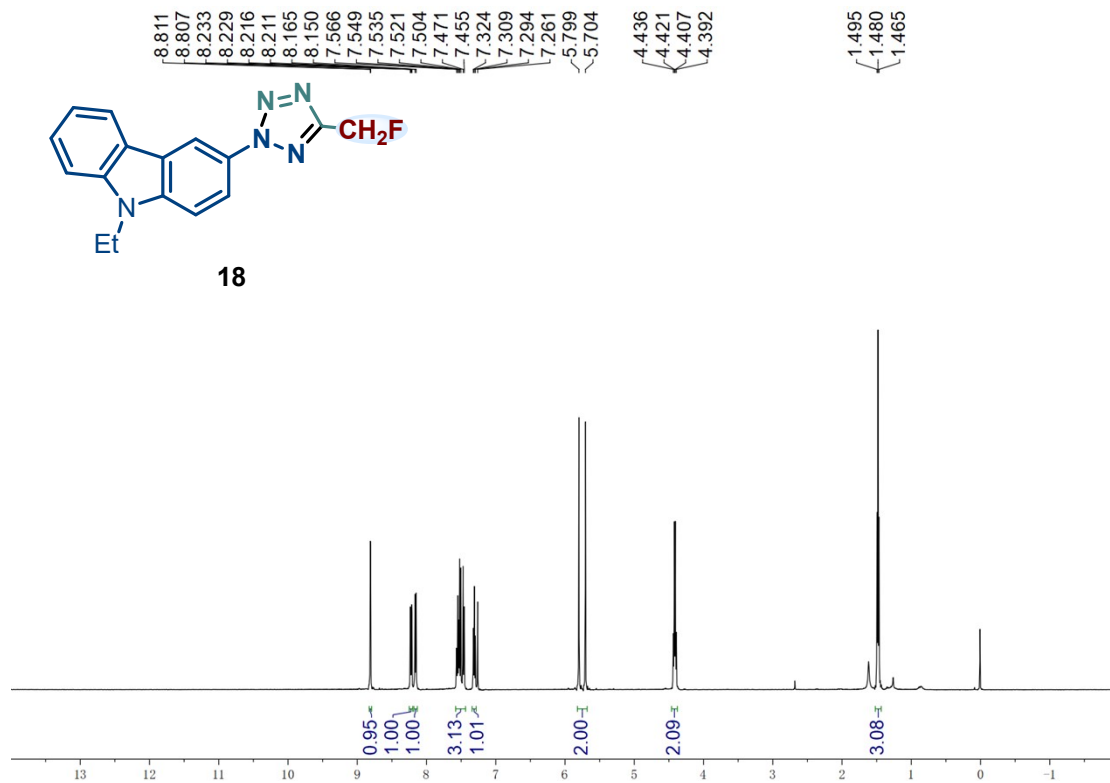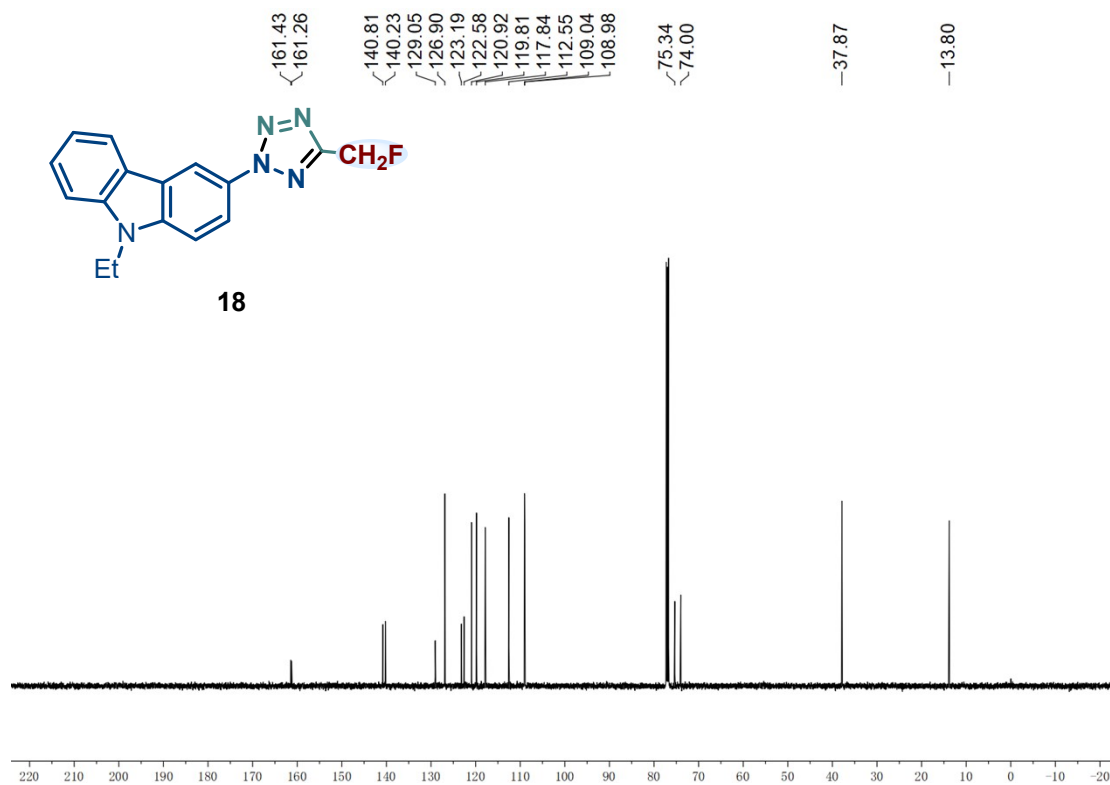



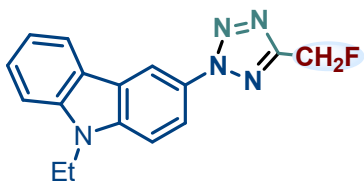

18

216.359  
216.462  
216.561

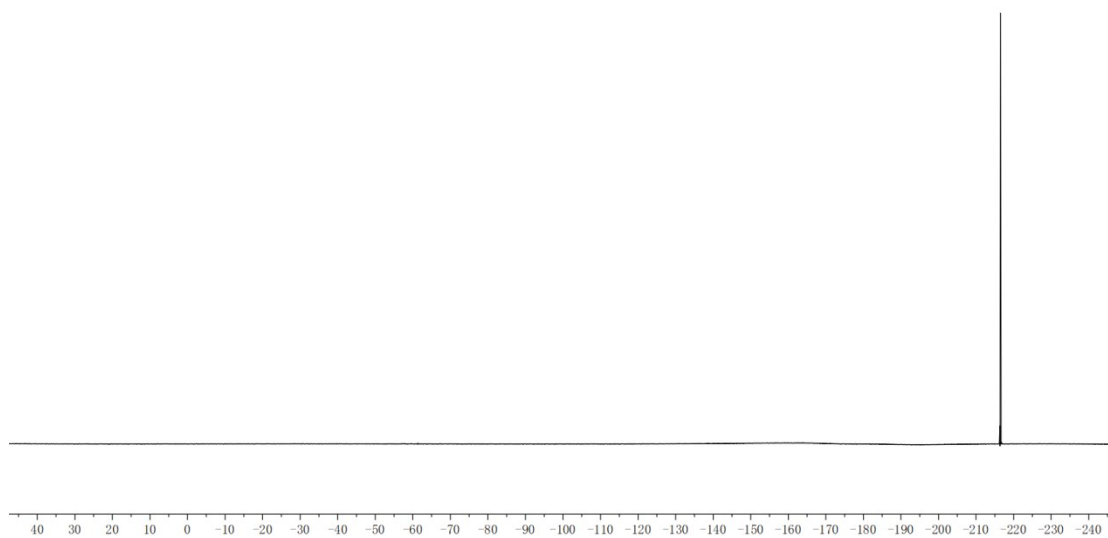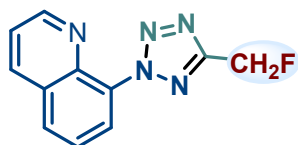

19

8.984  
8.979  
8.976  
8.318  
8.315  
8.301  
8.299  
8.109  
8.093  
8.003  
7.988  
7.738  
7.721  
7.706  
7.566  
7.557  
7.549  
7.541  
5.860  
5.765

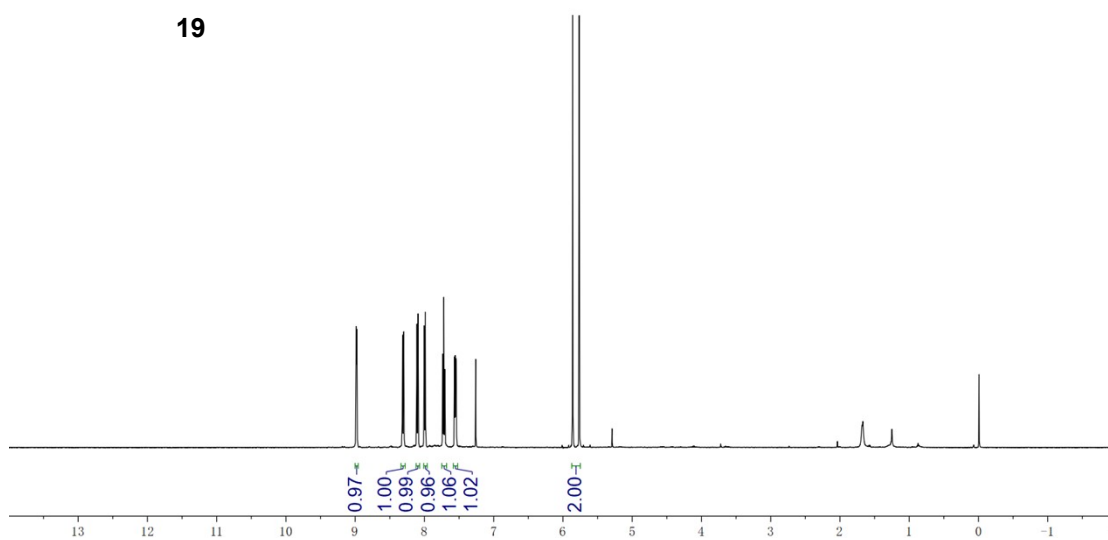

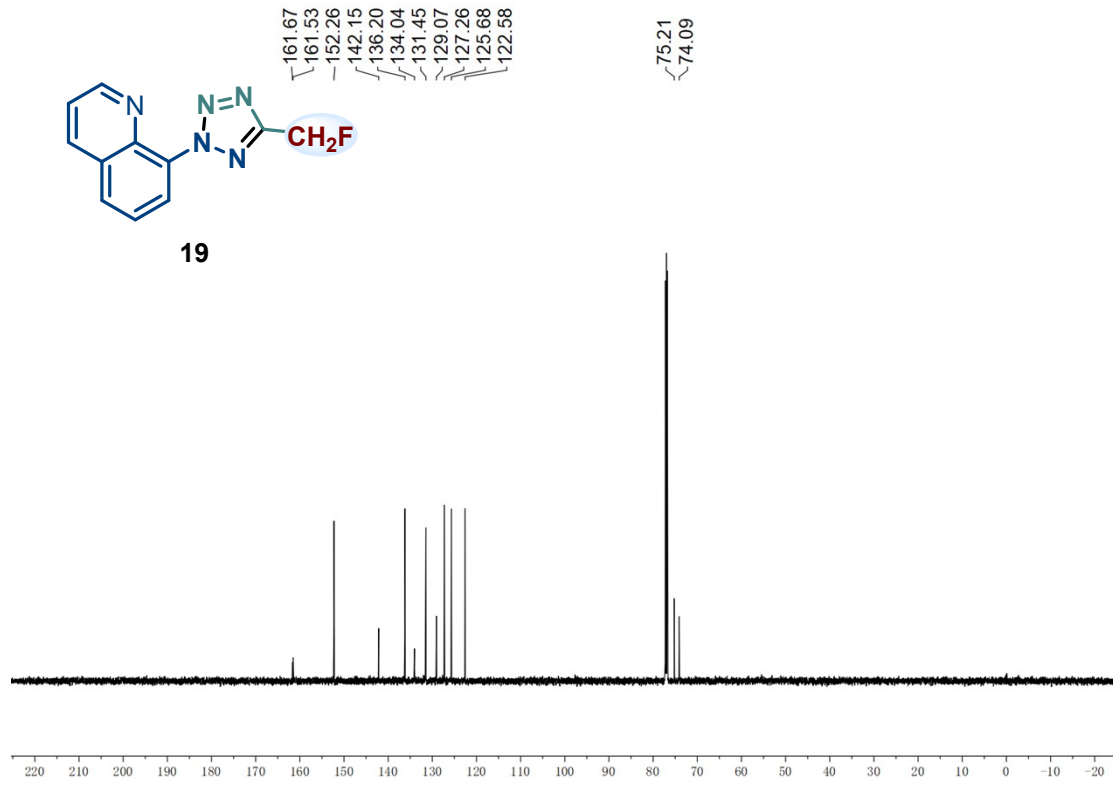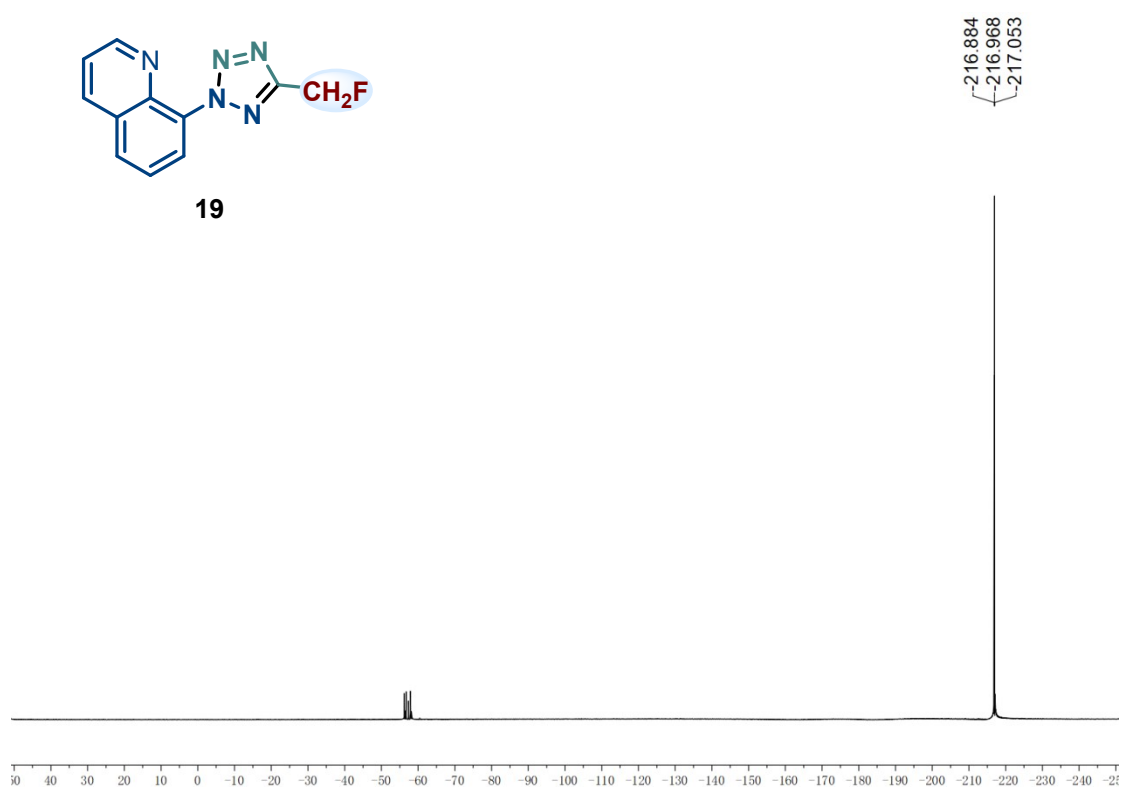

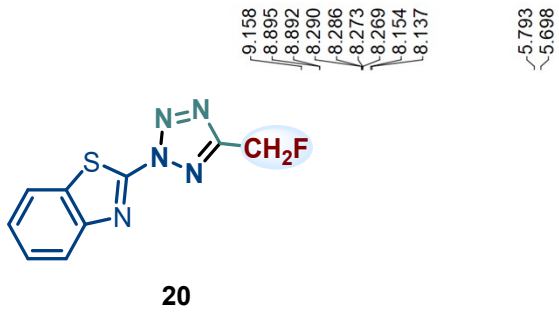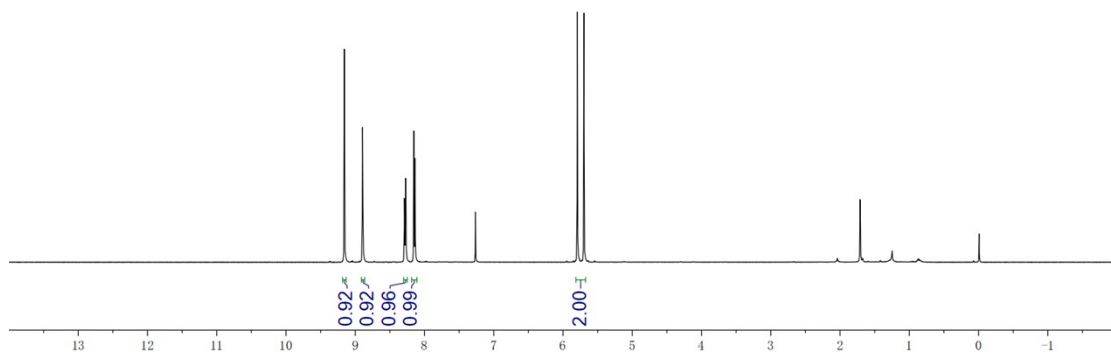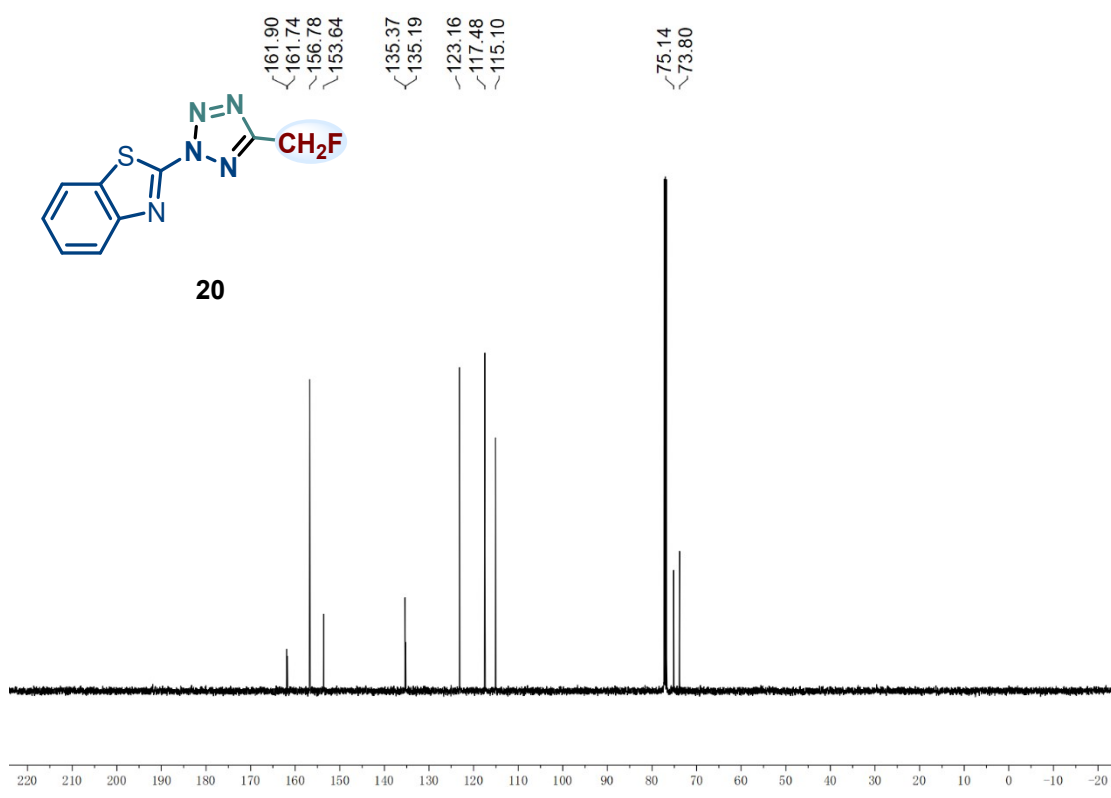

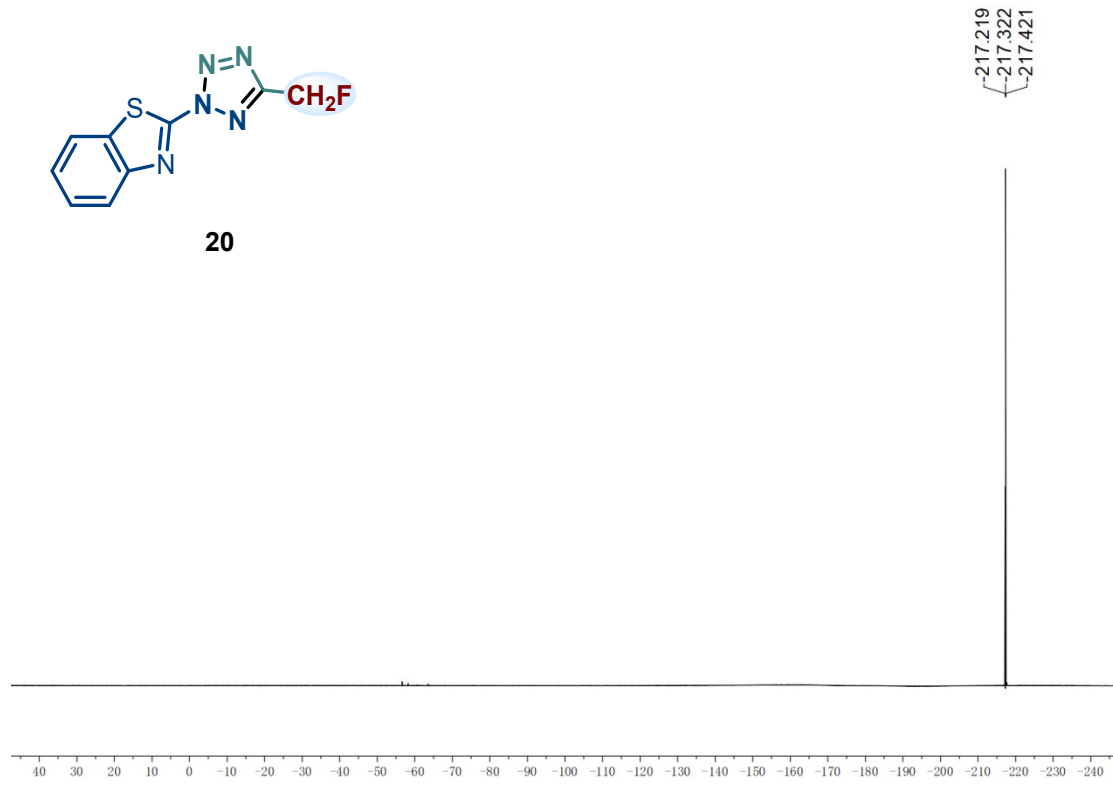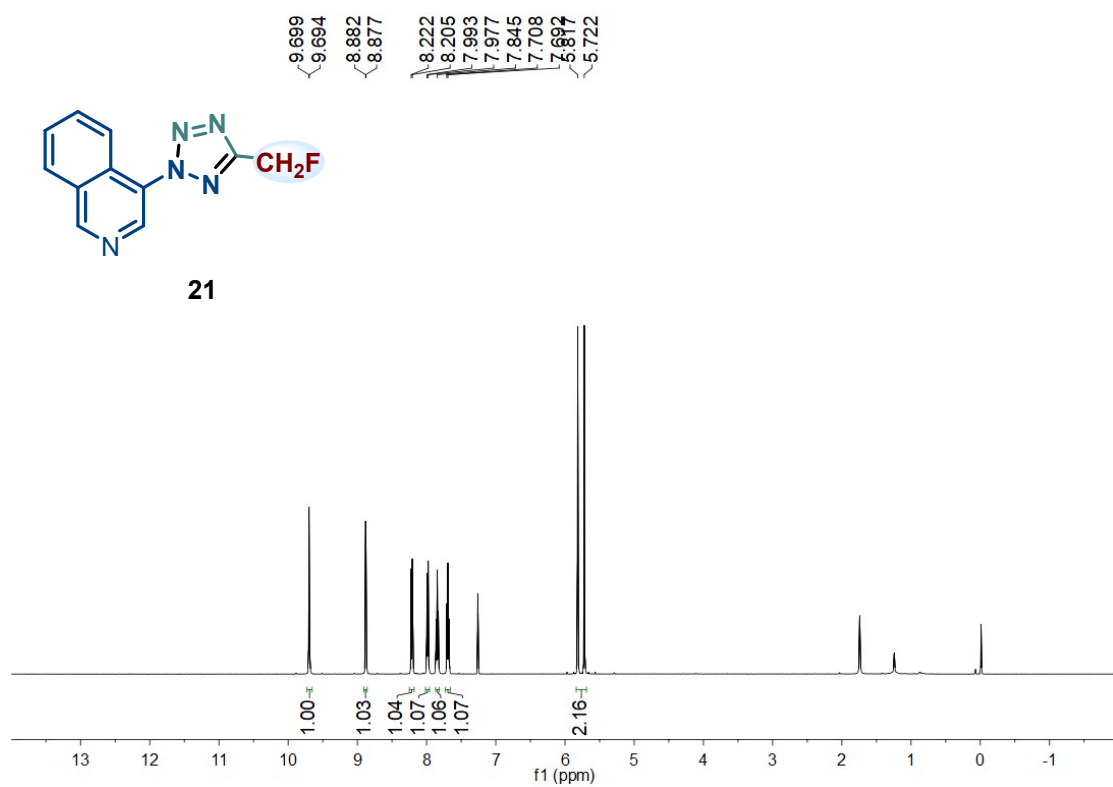

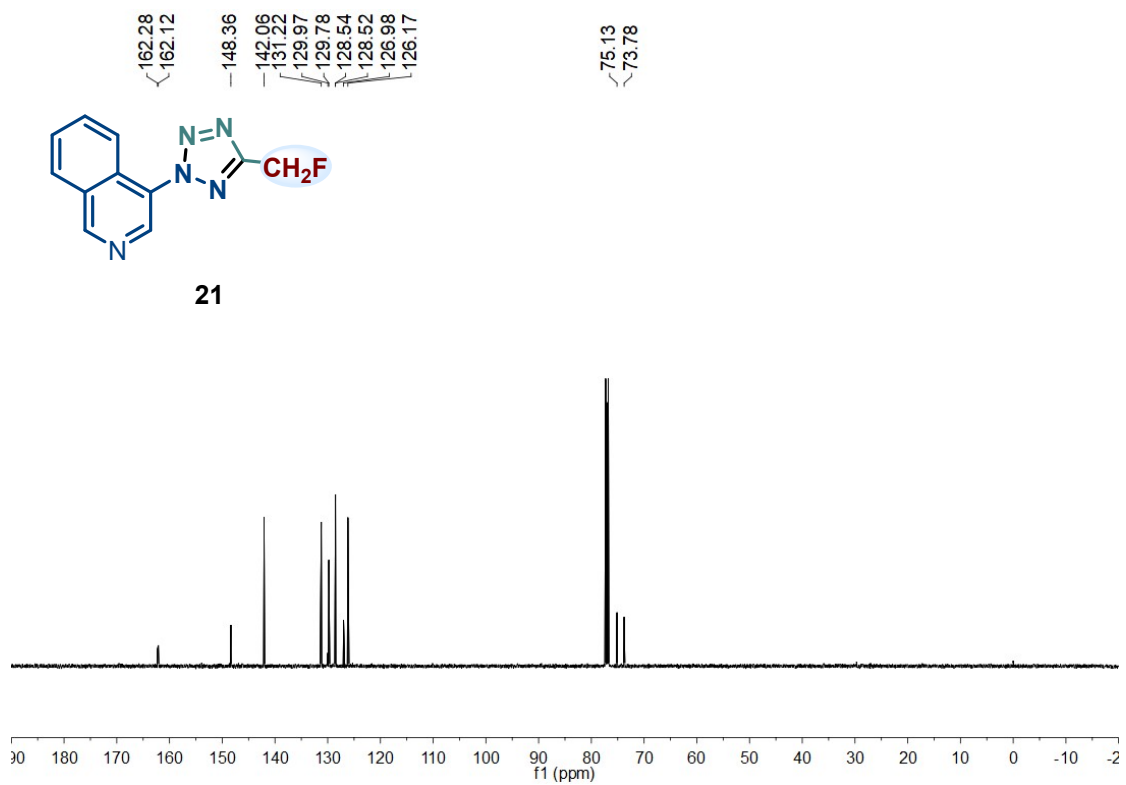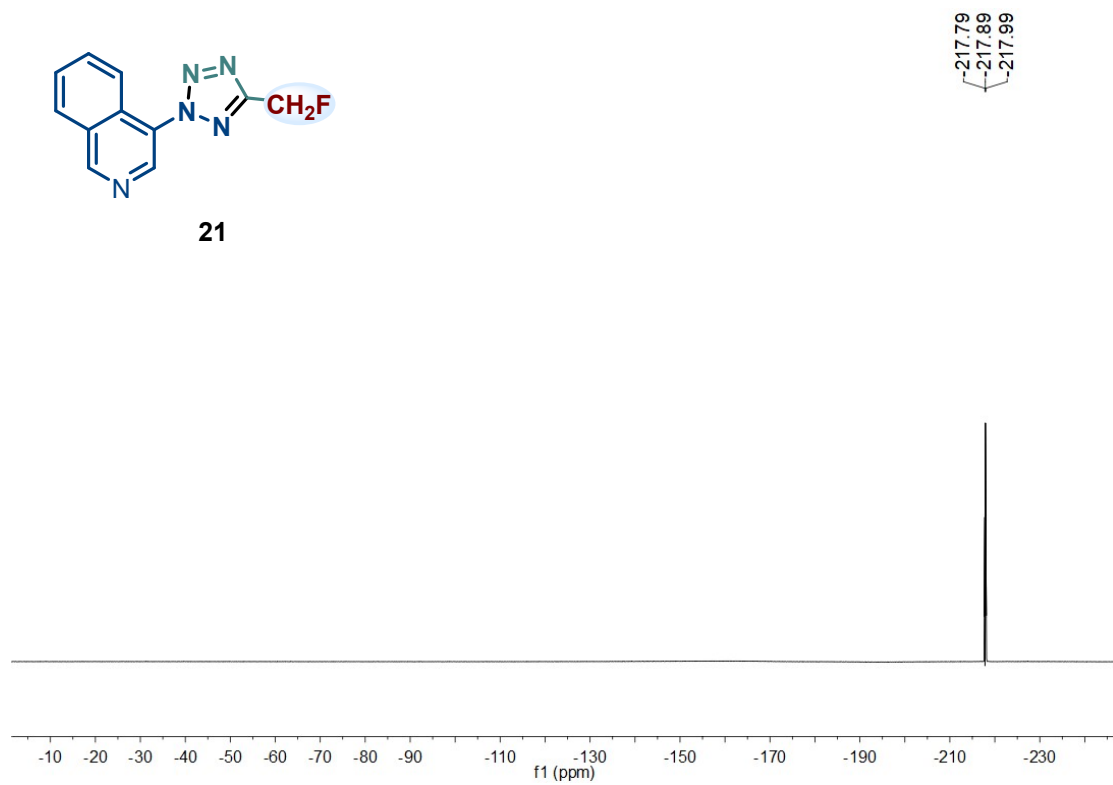

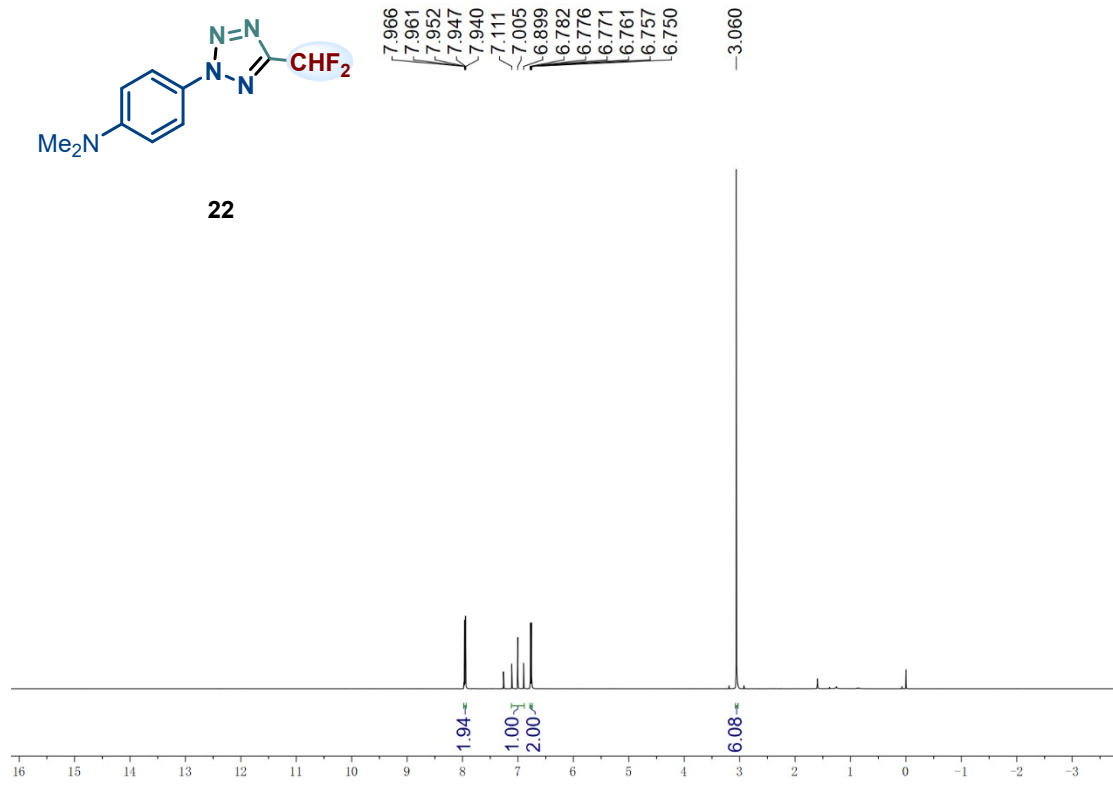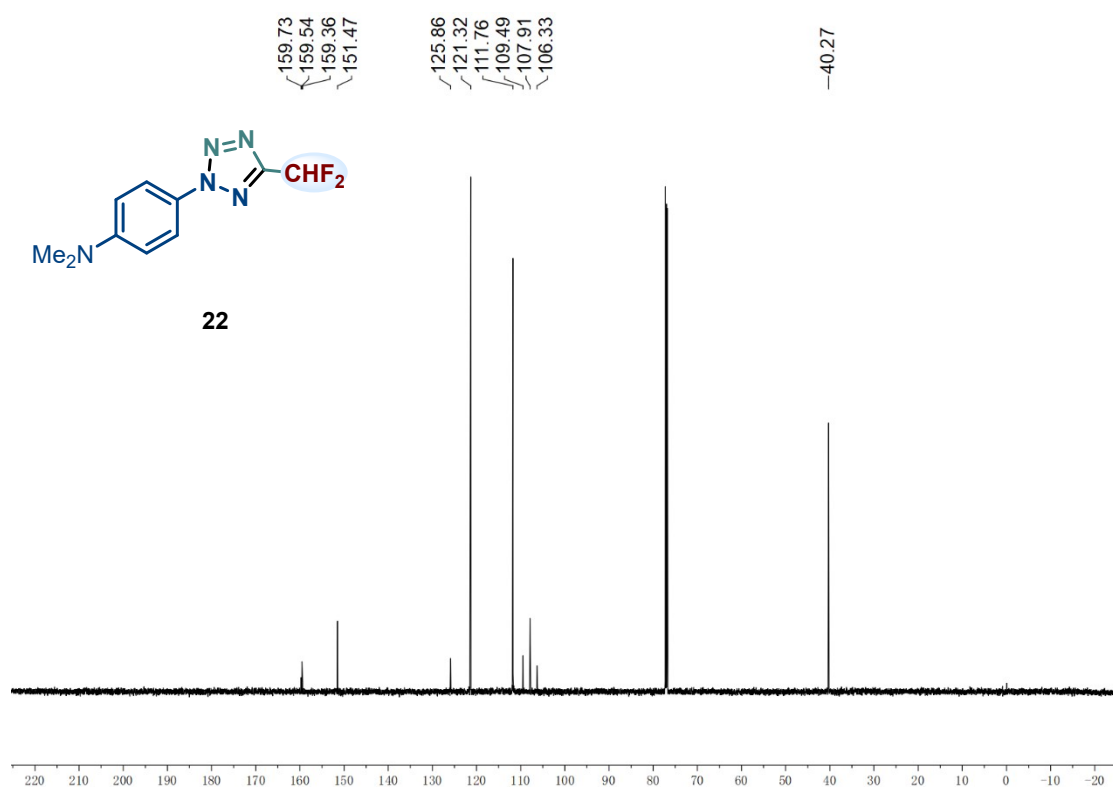

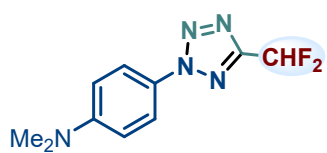

22

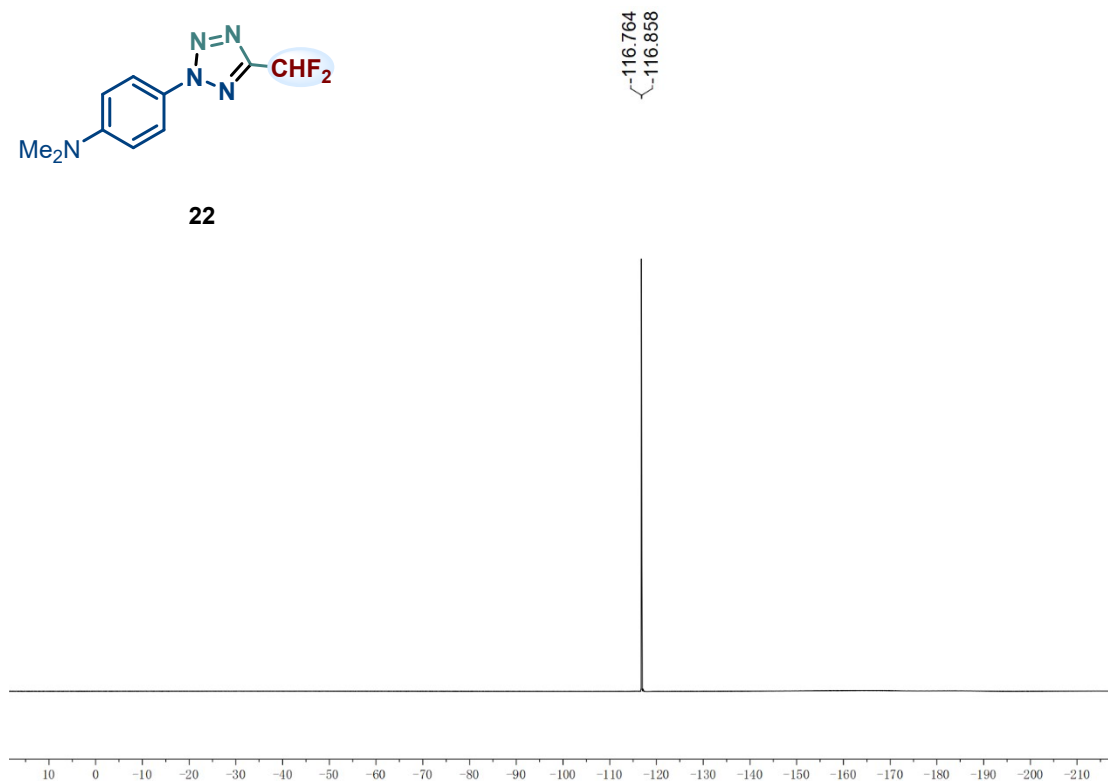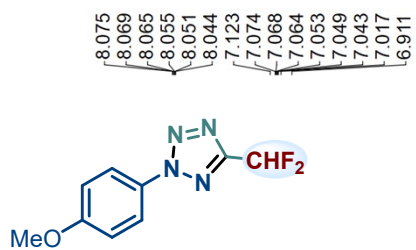

23

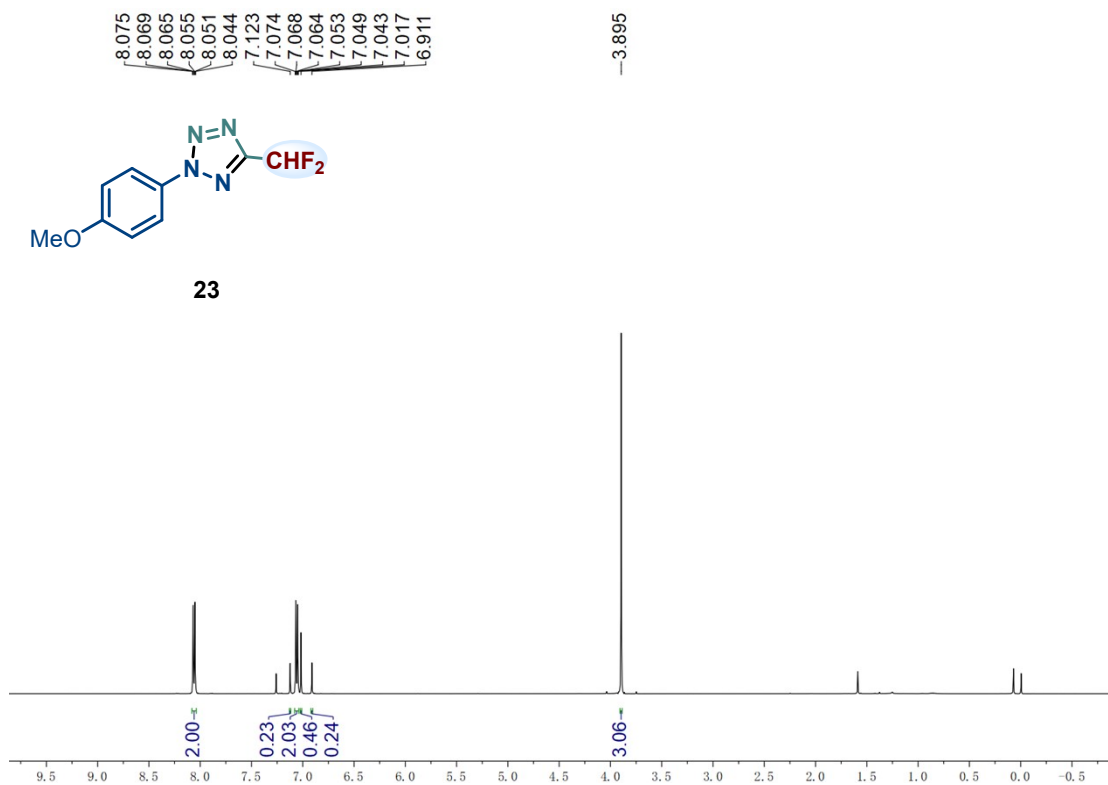

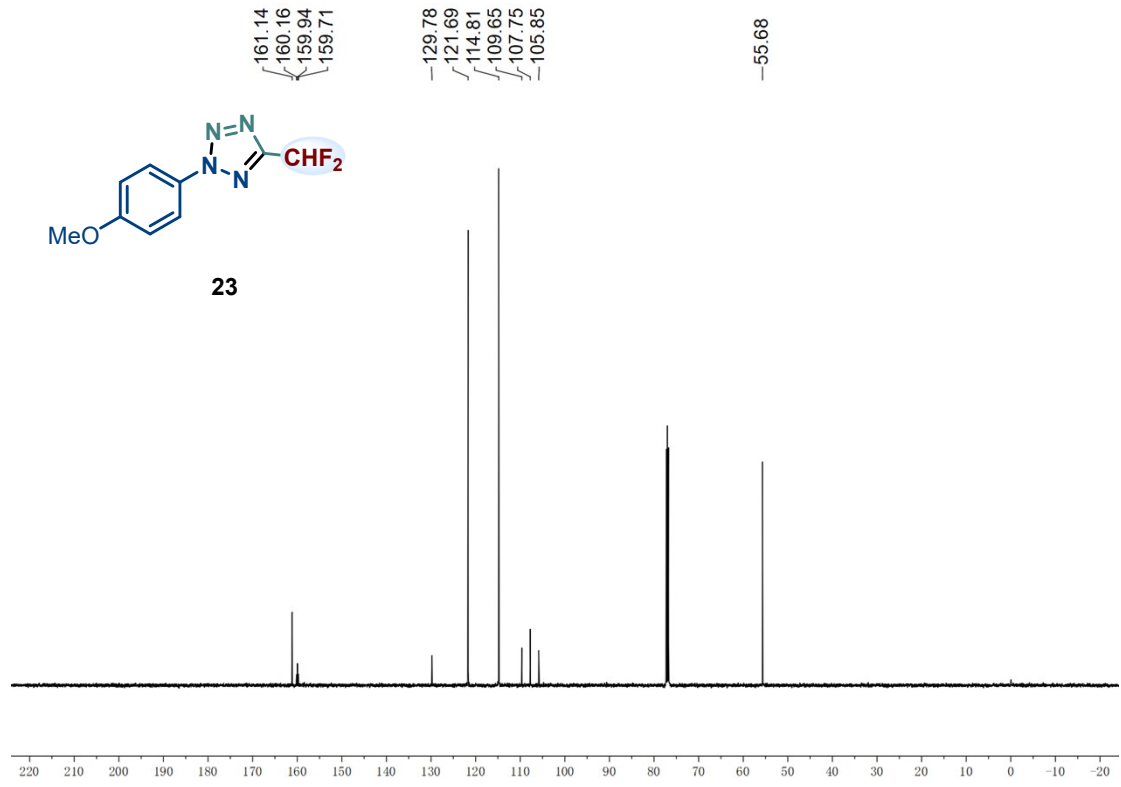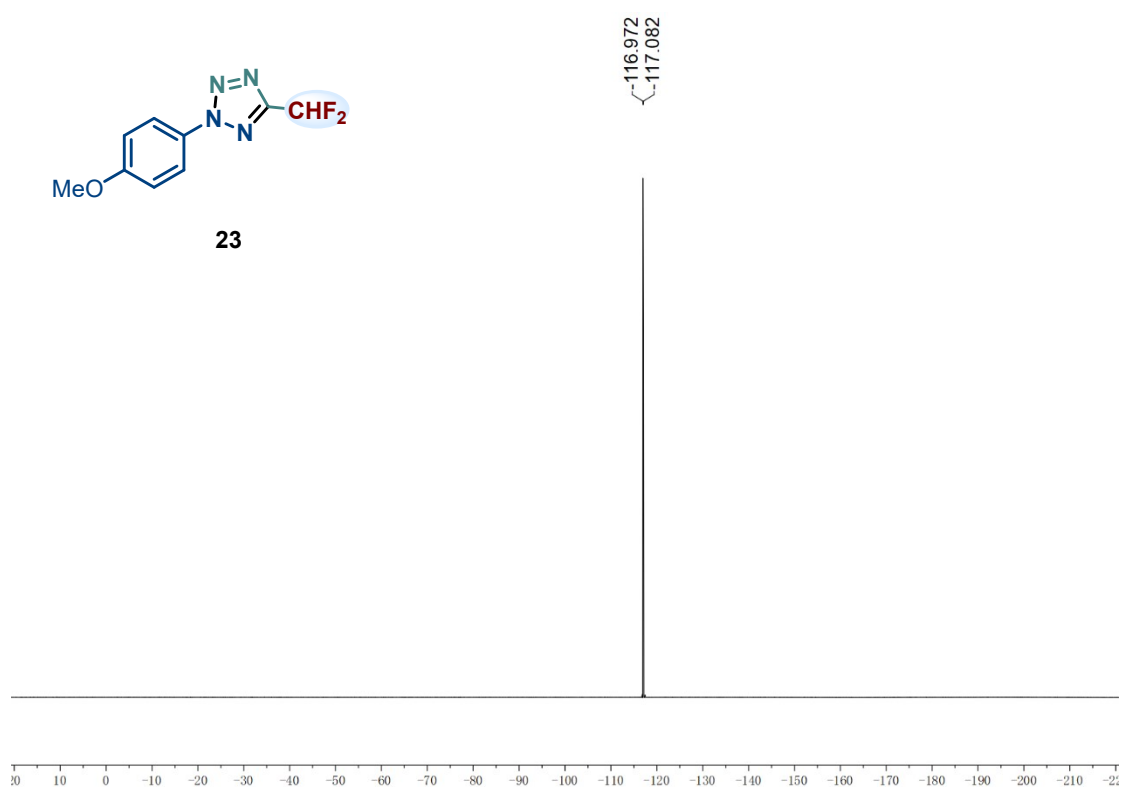



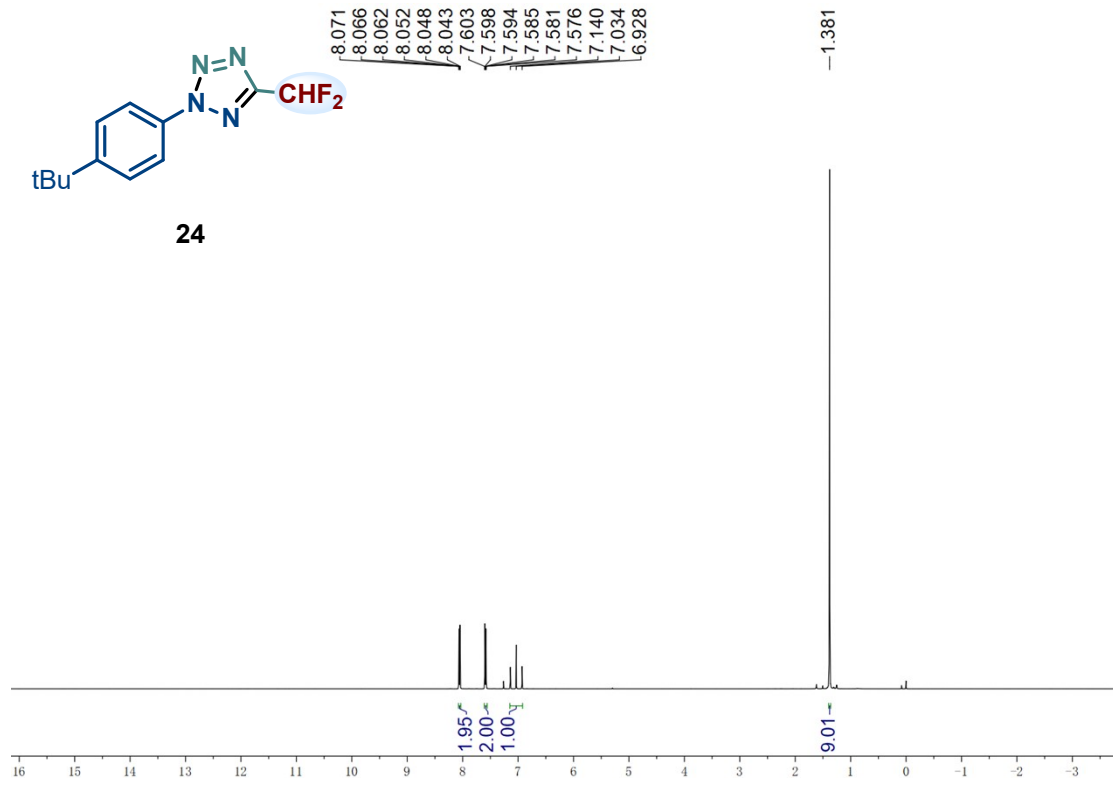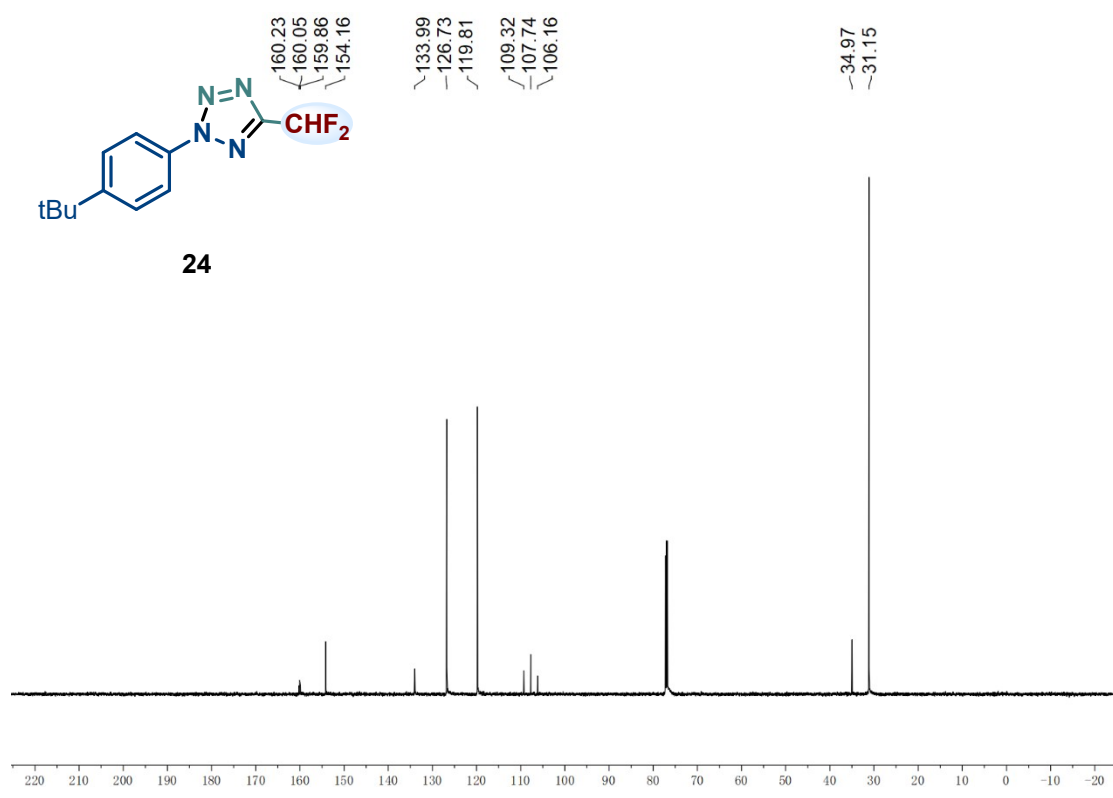

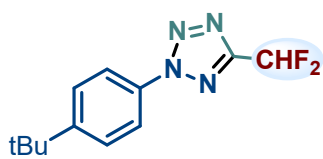

24

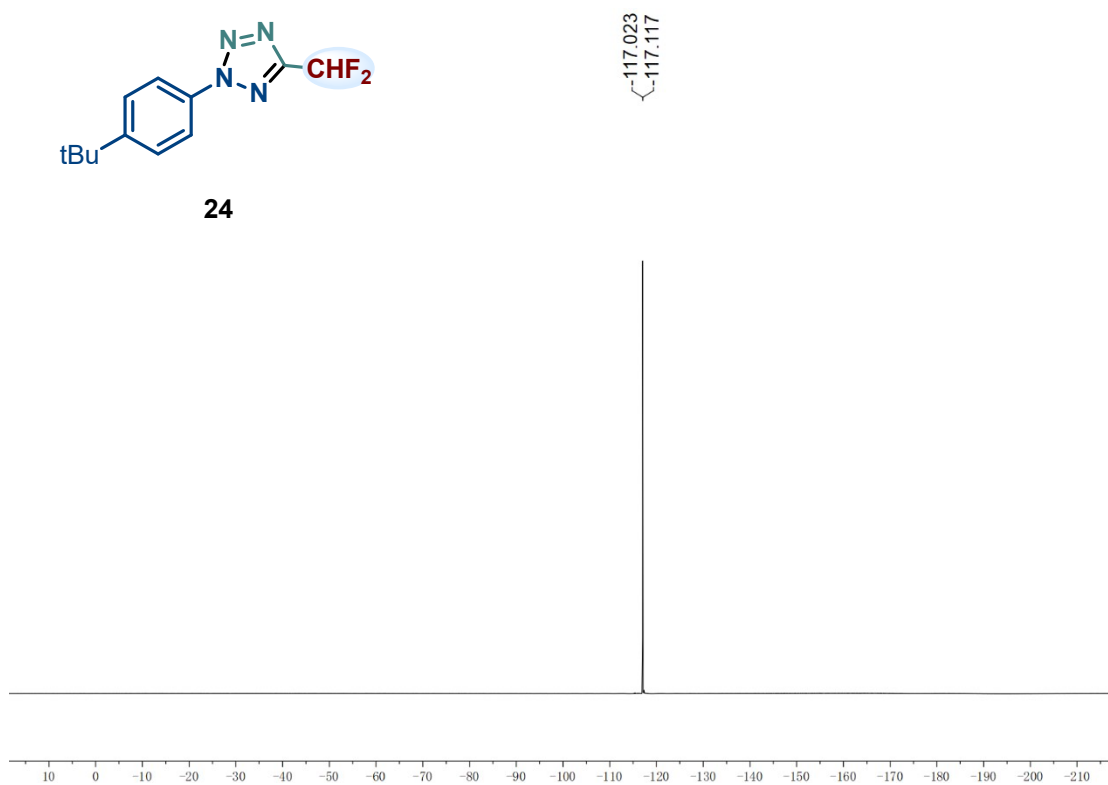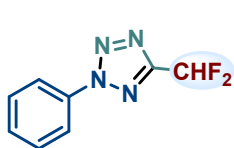

25

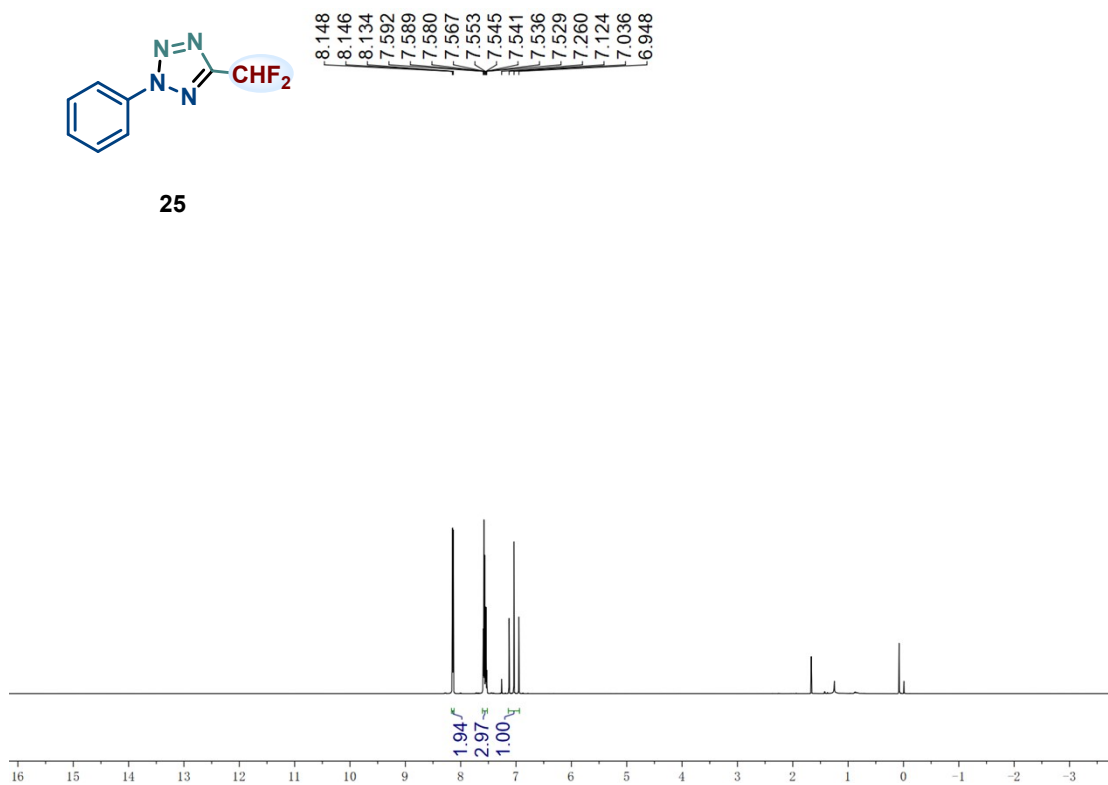

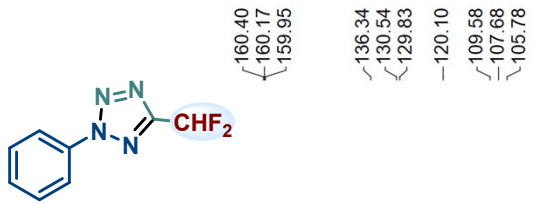

25

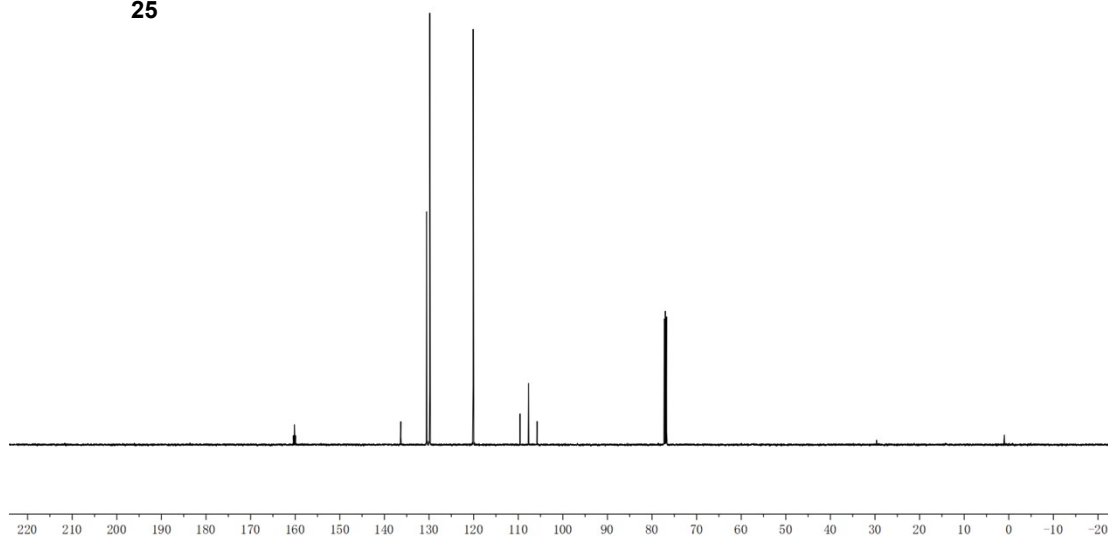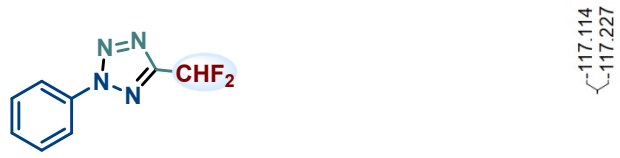

25

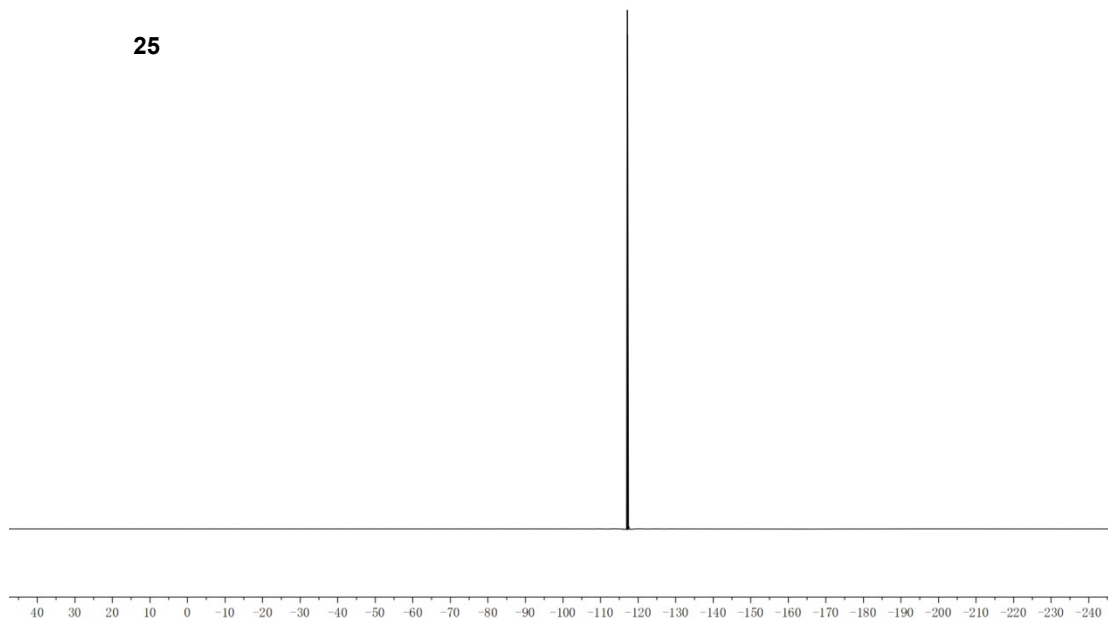

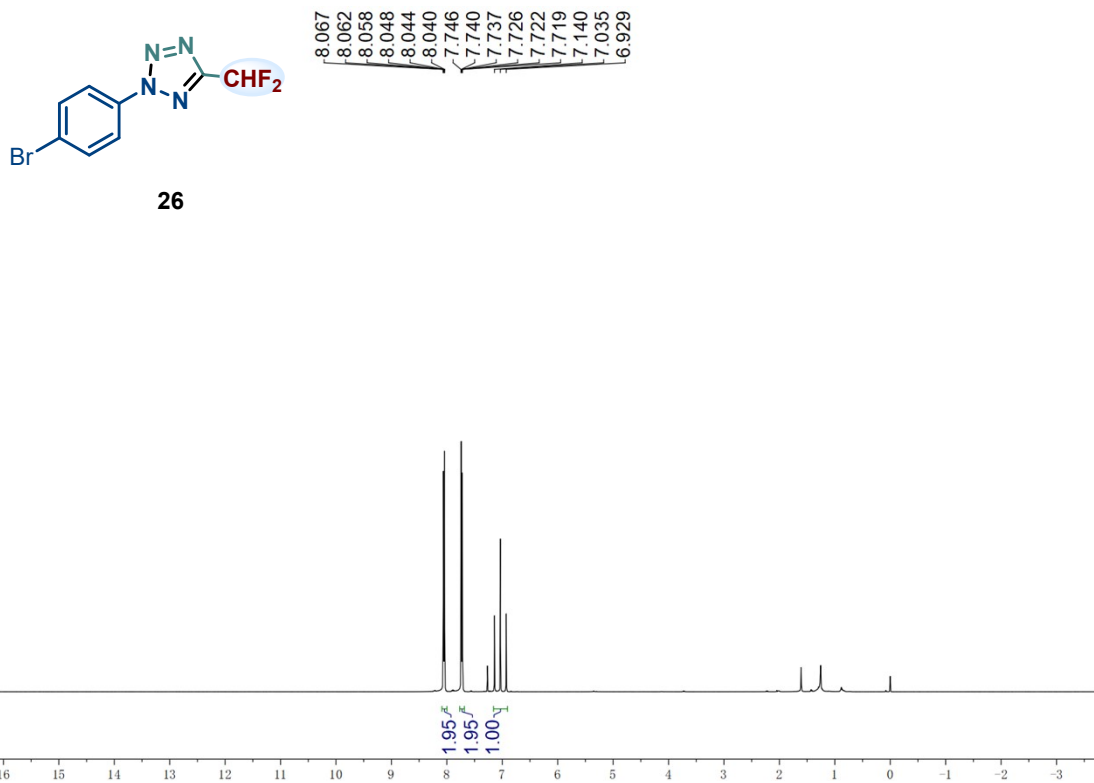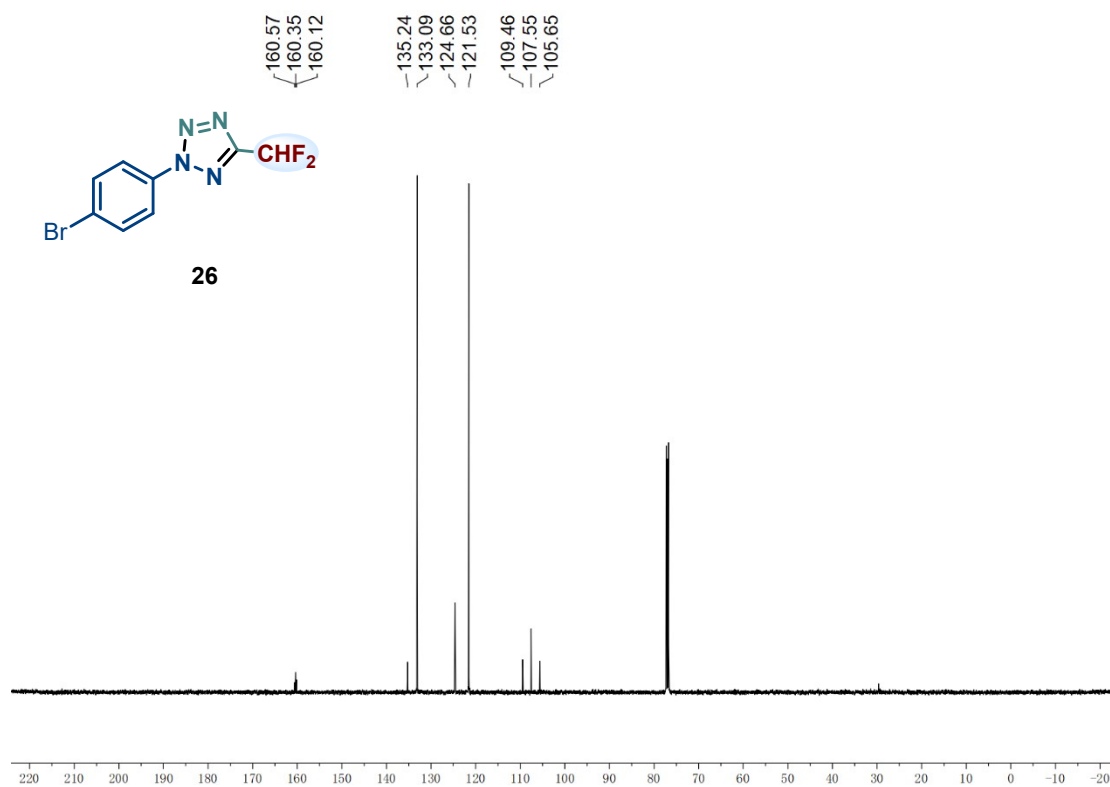

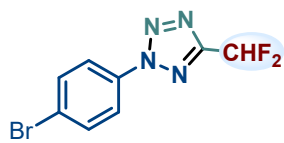

26

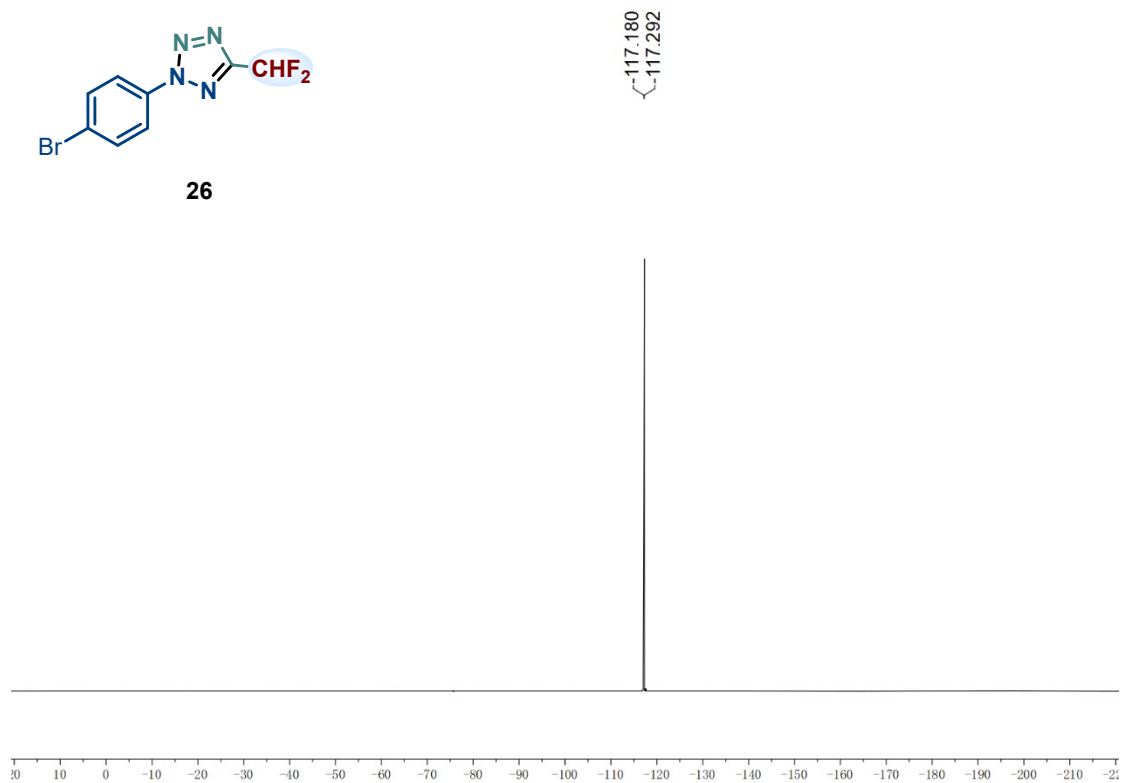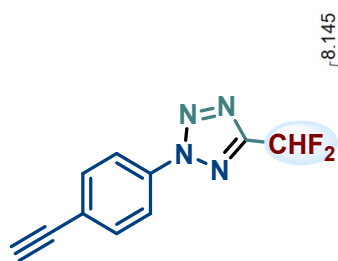

27

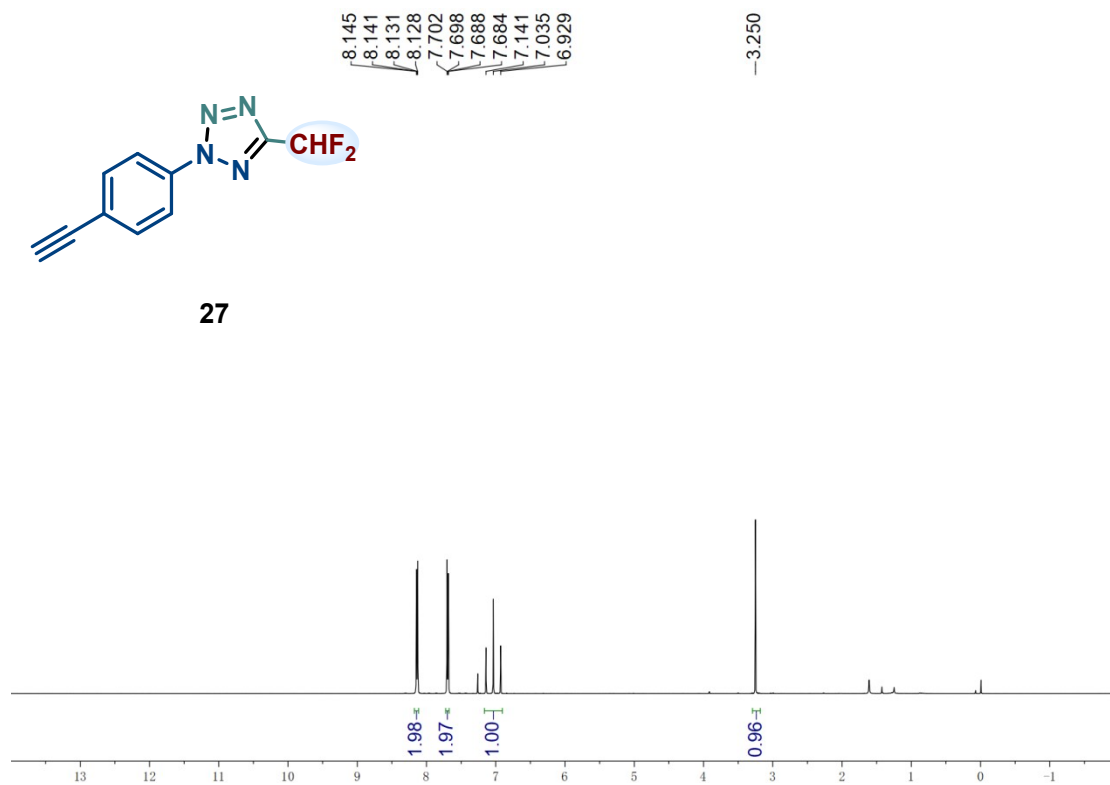

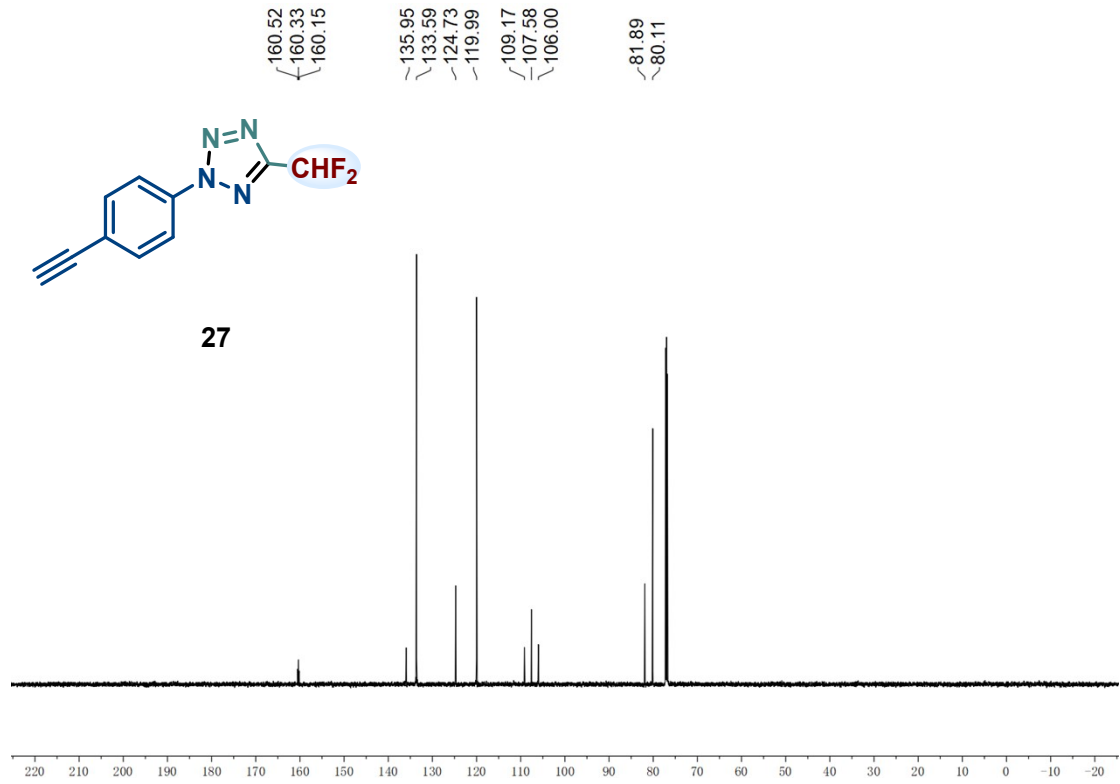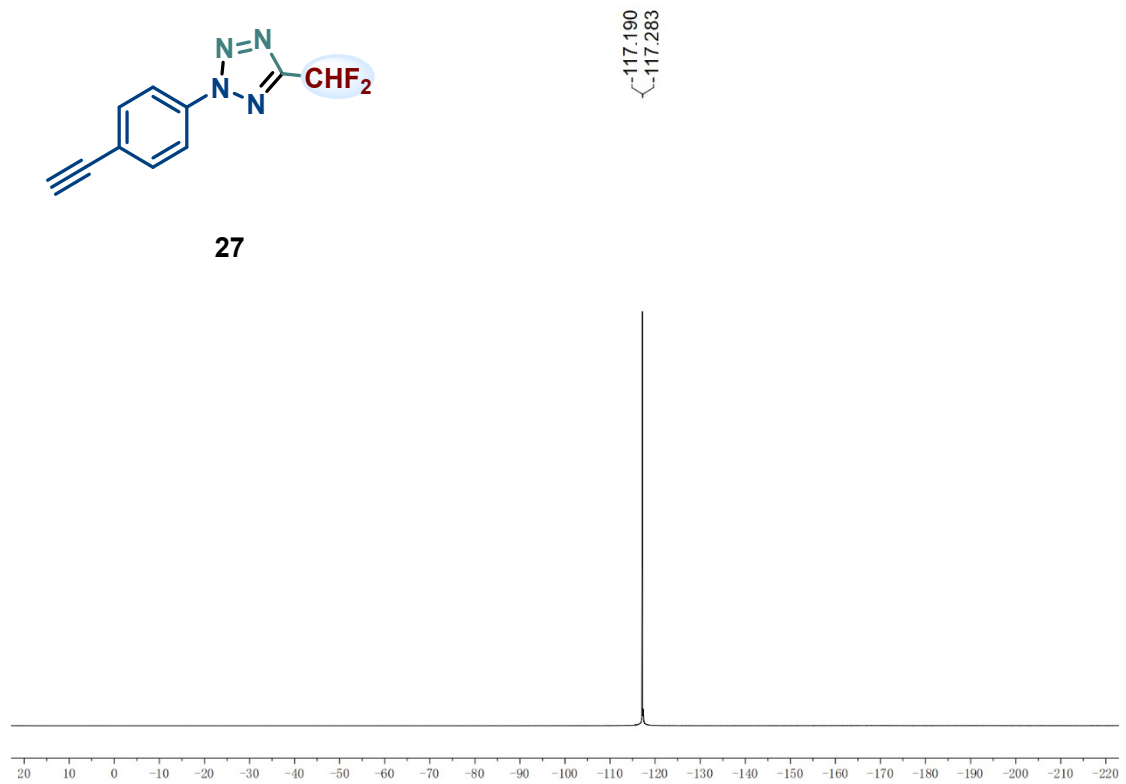

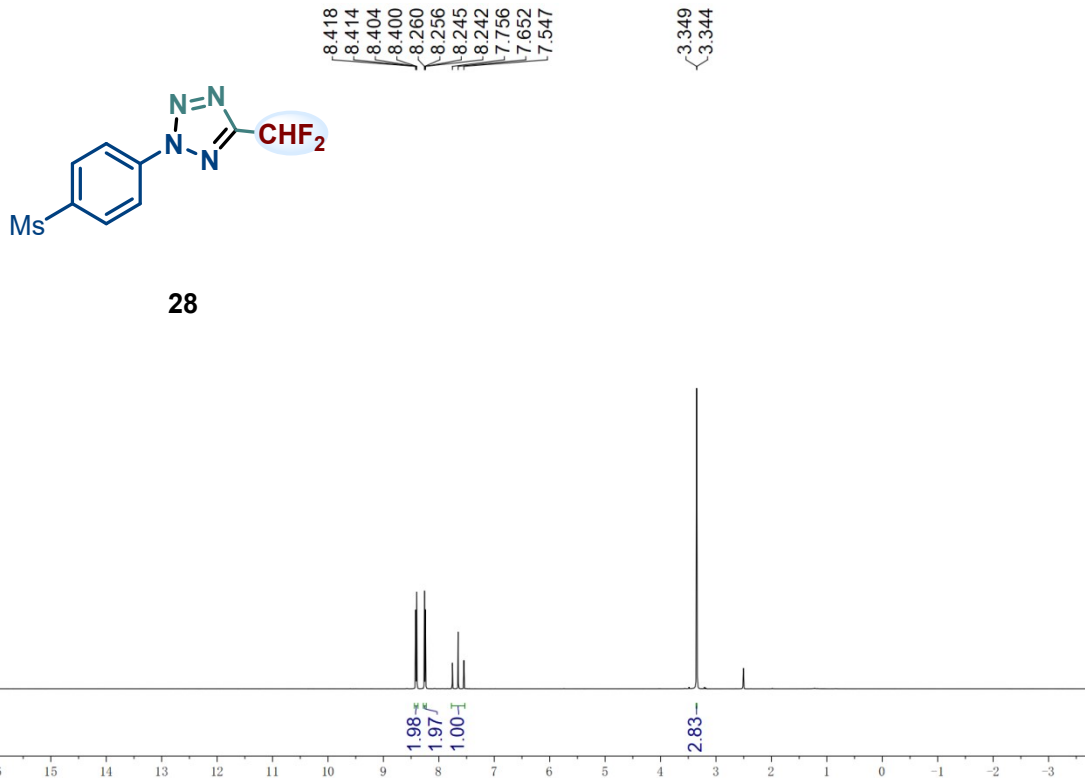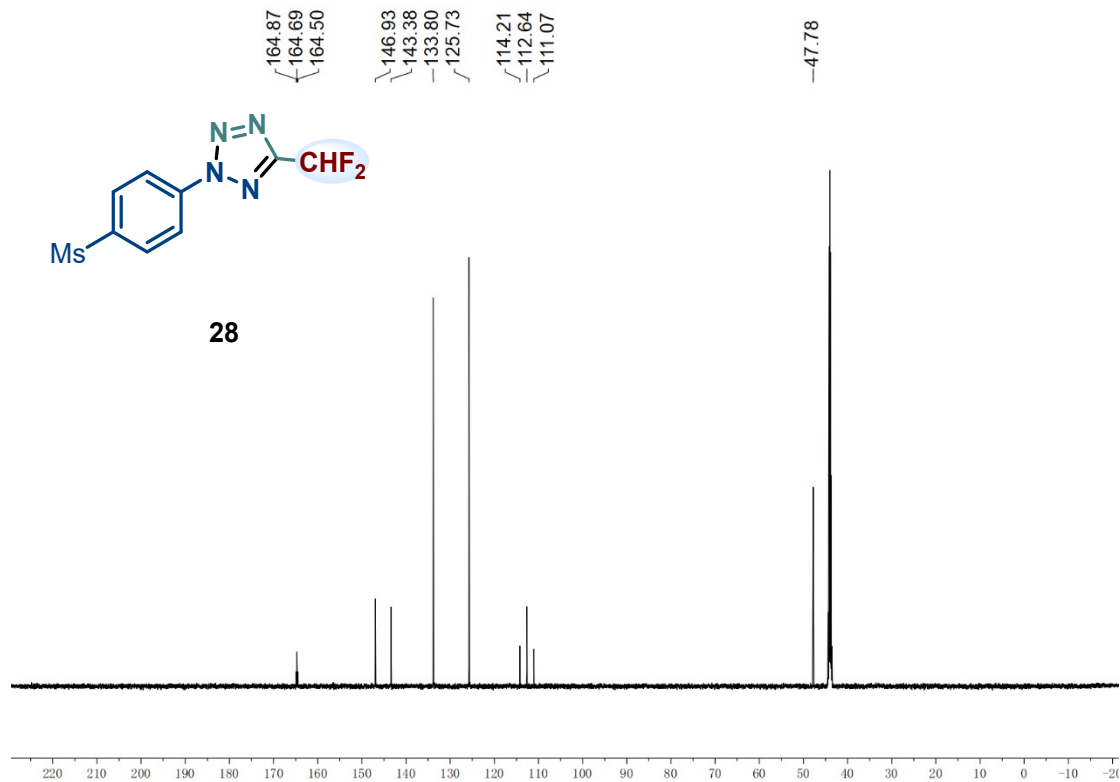

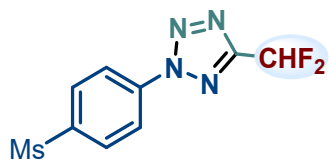

28

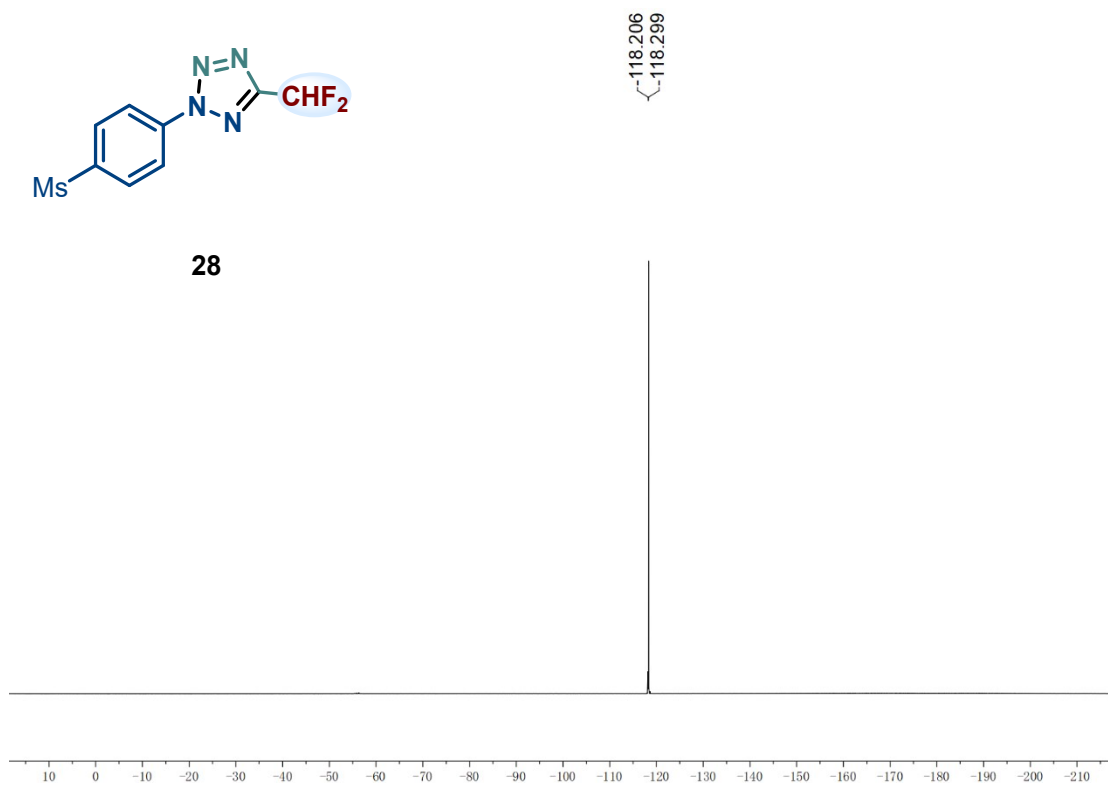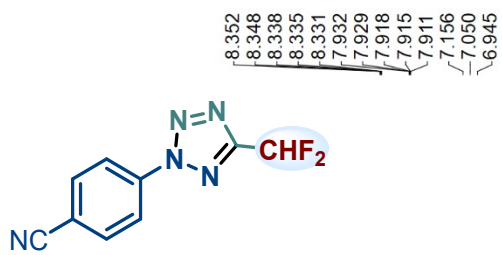

29

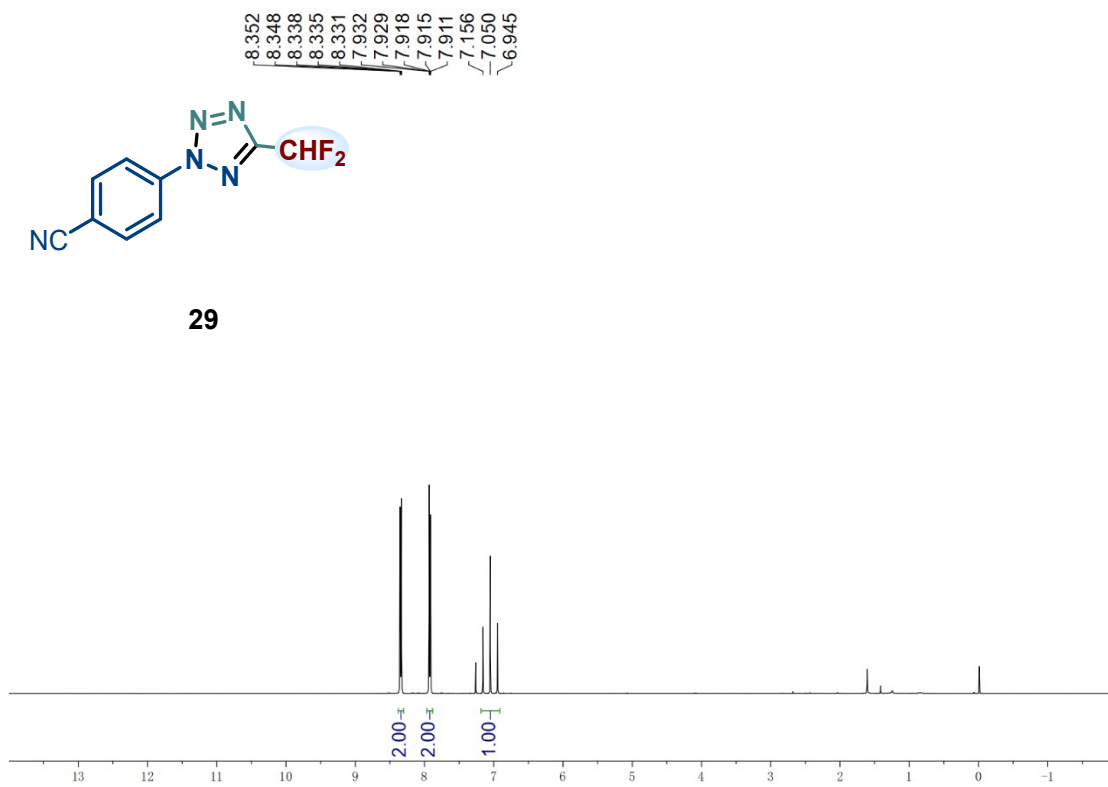



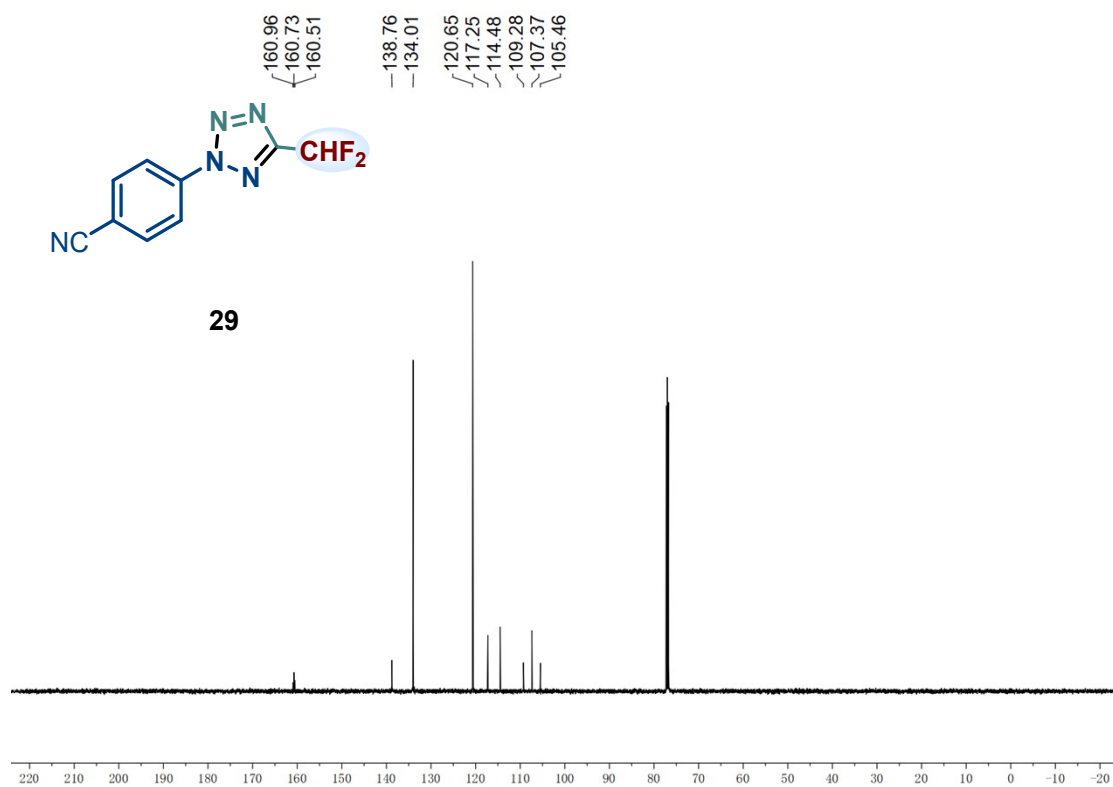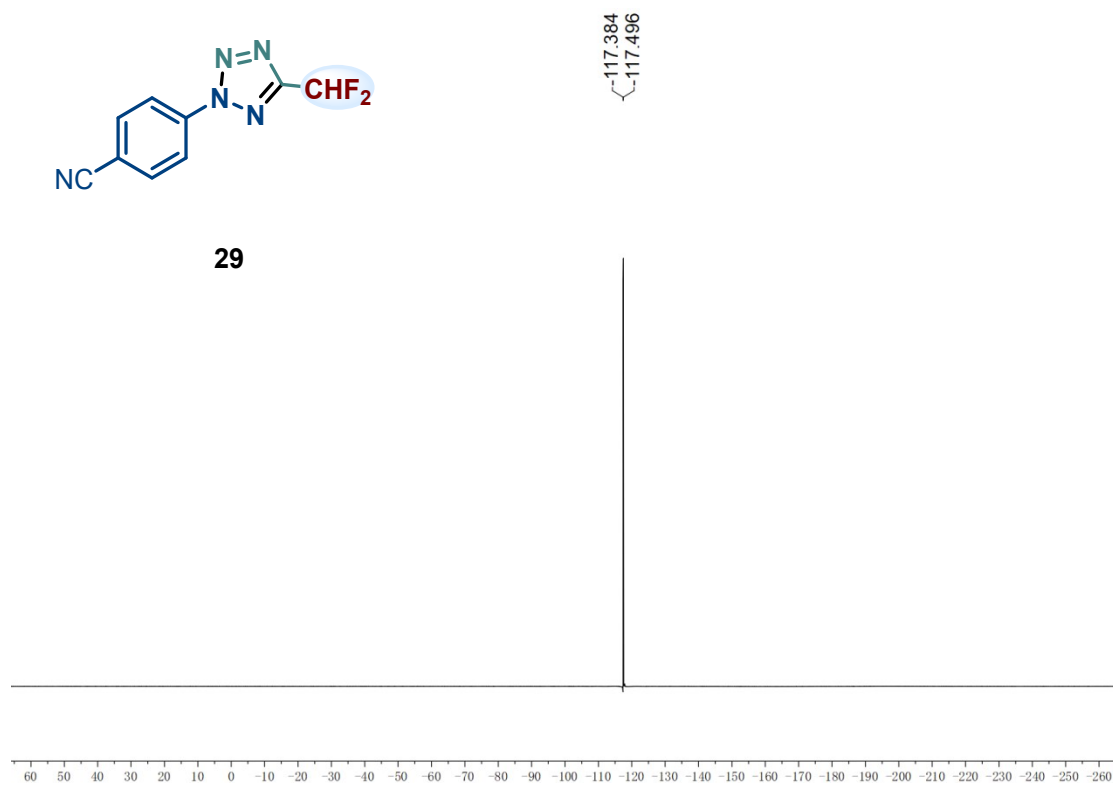

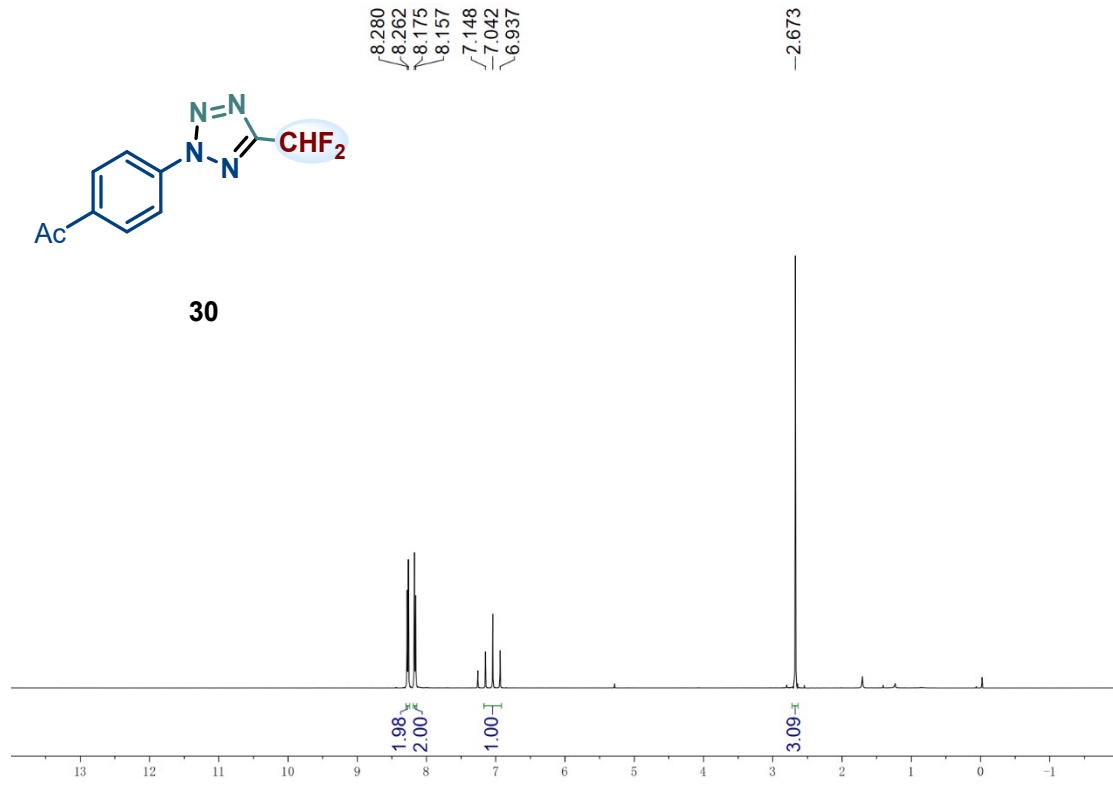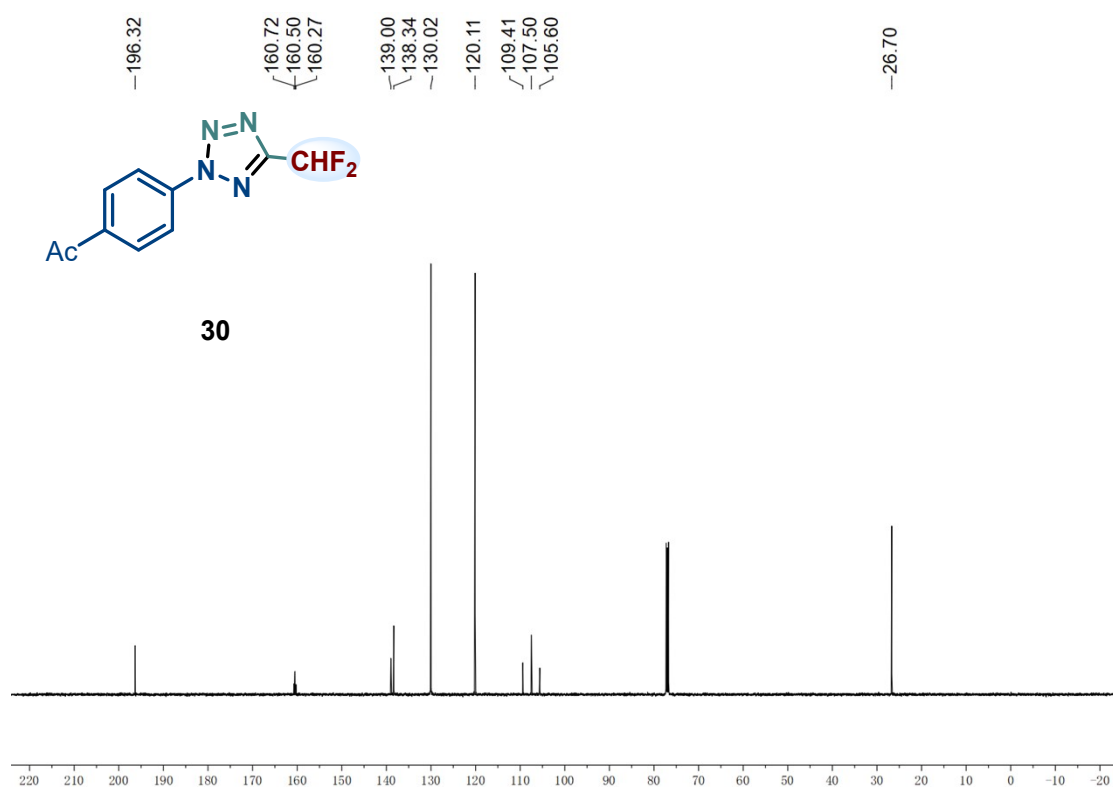

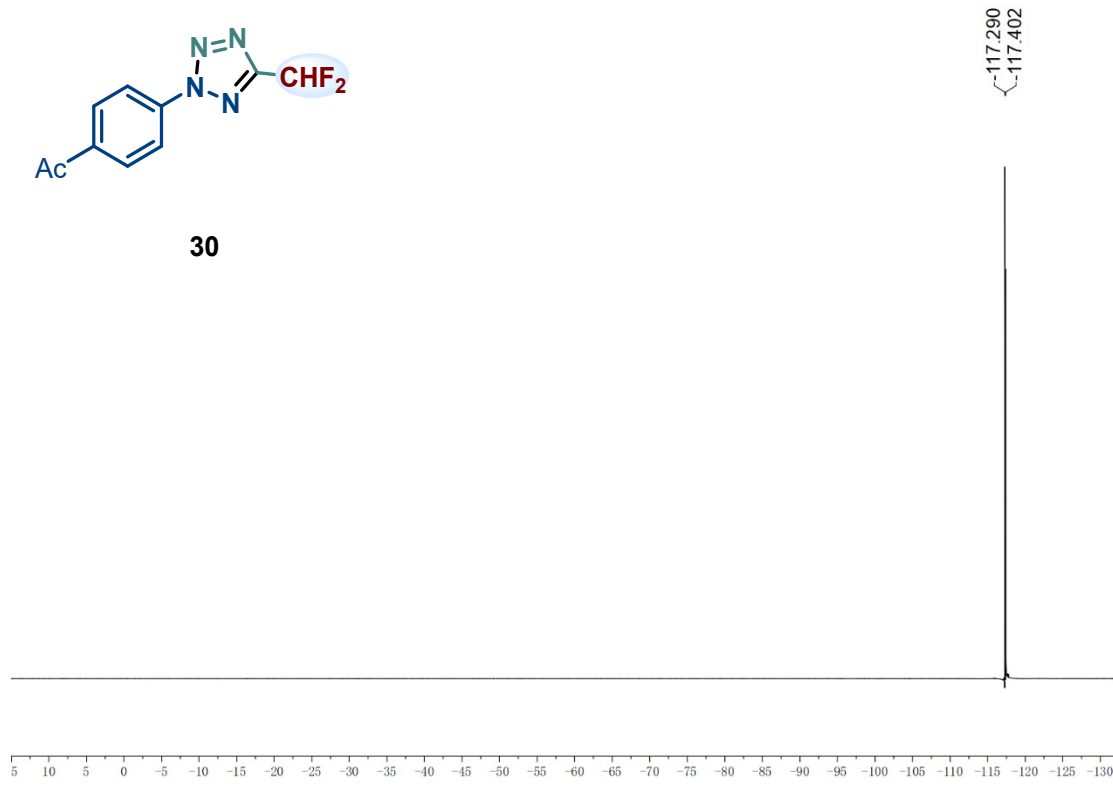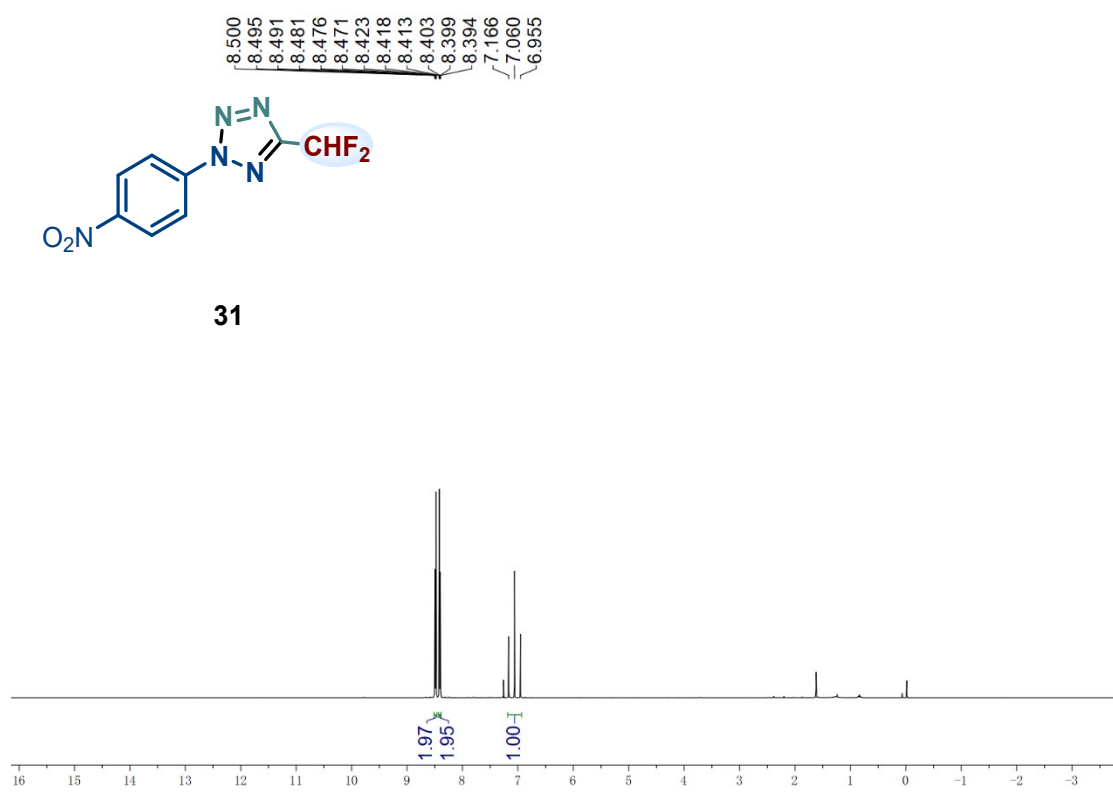

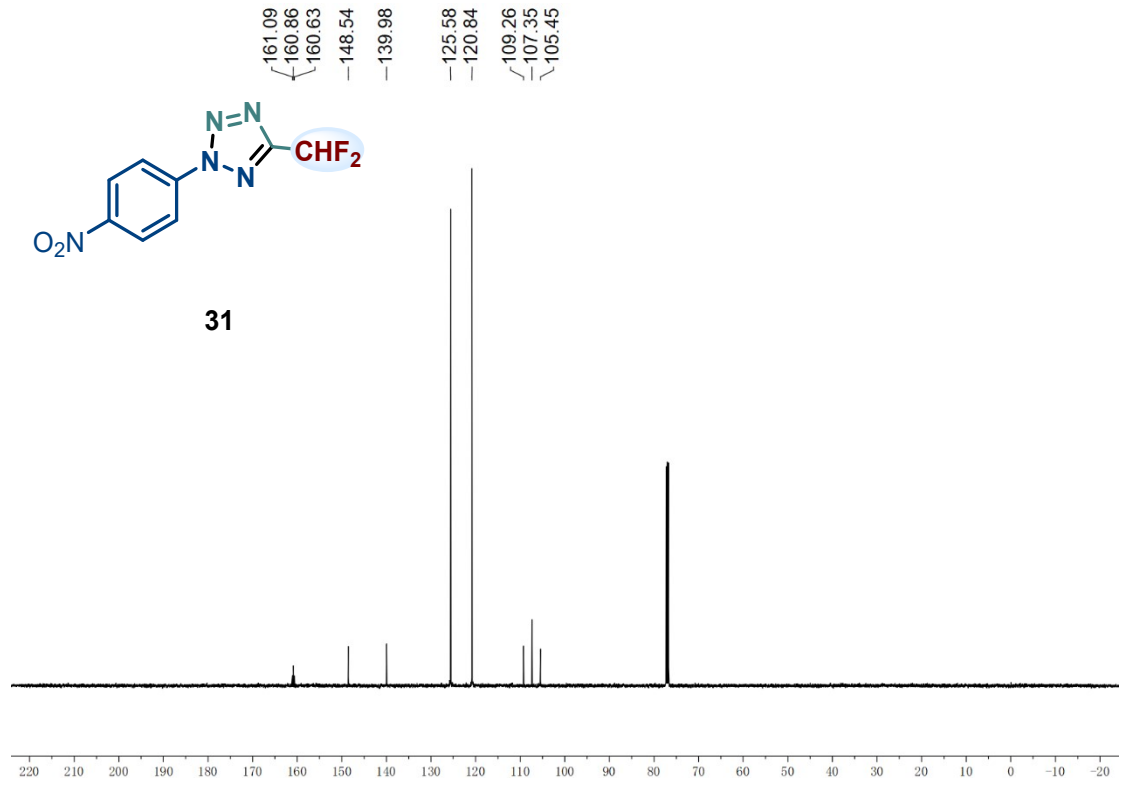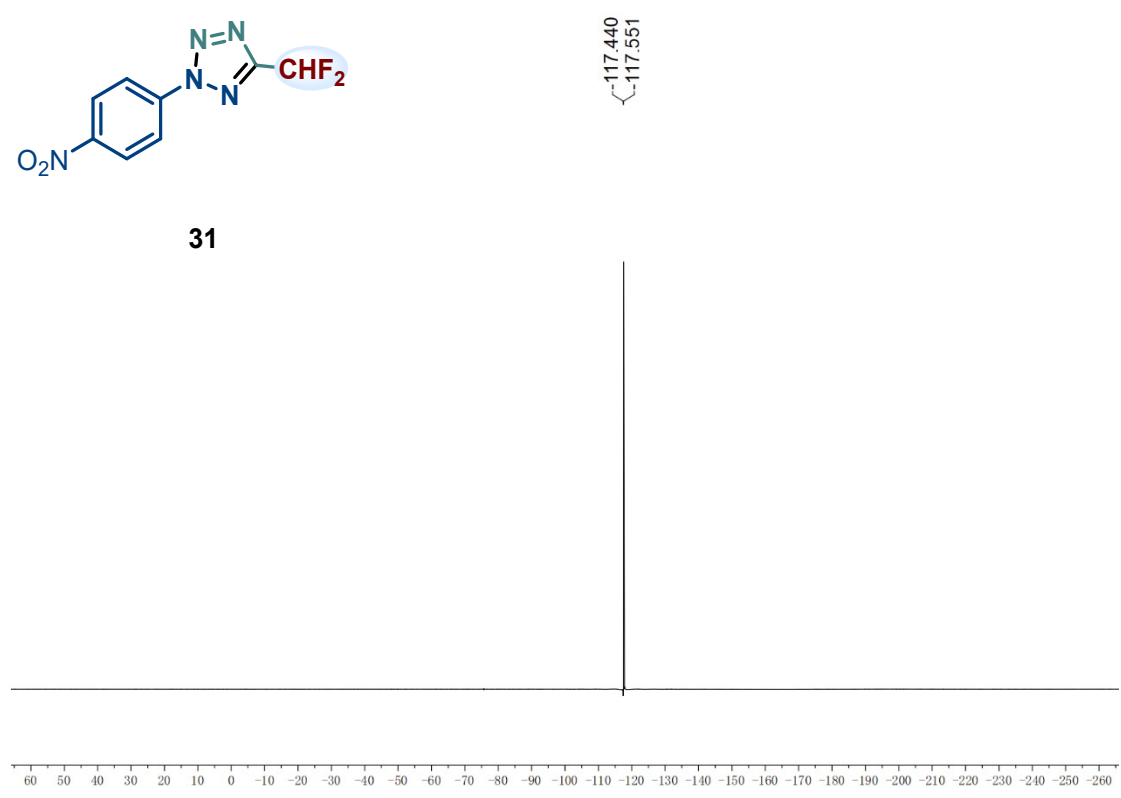

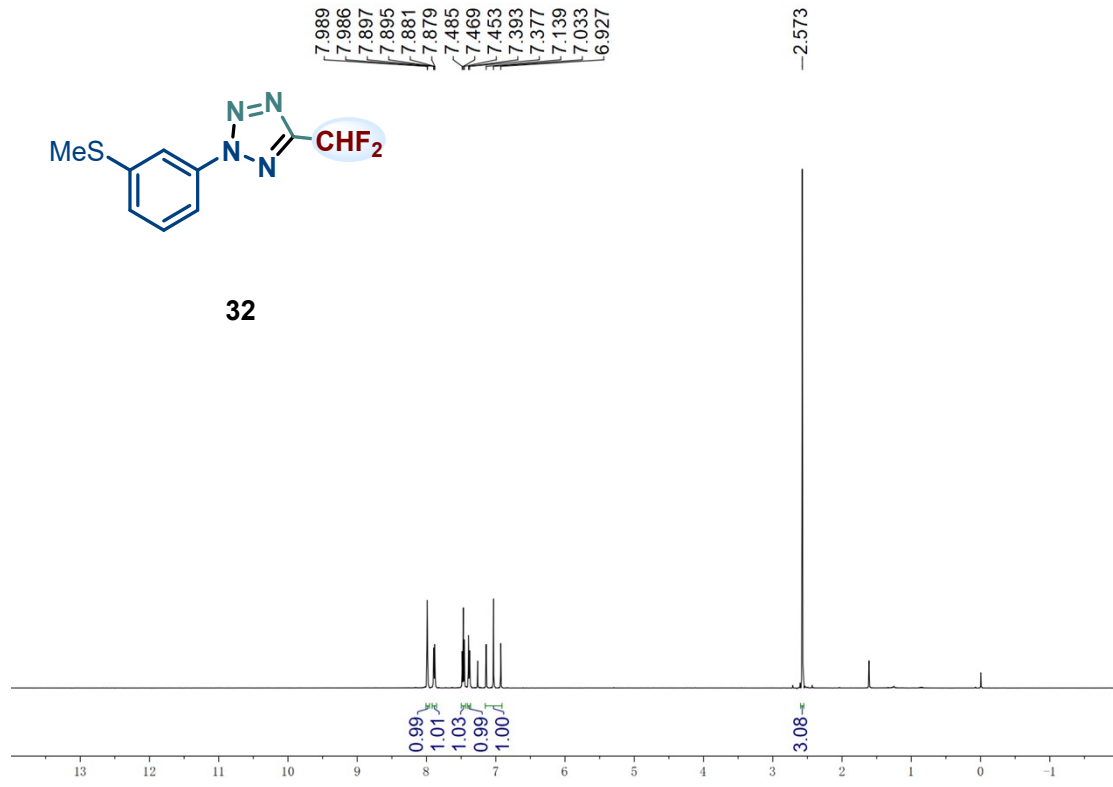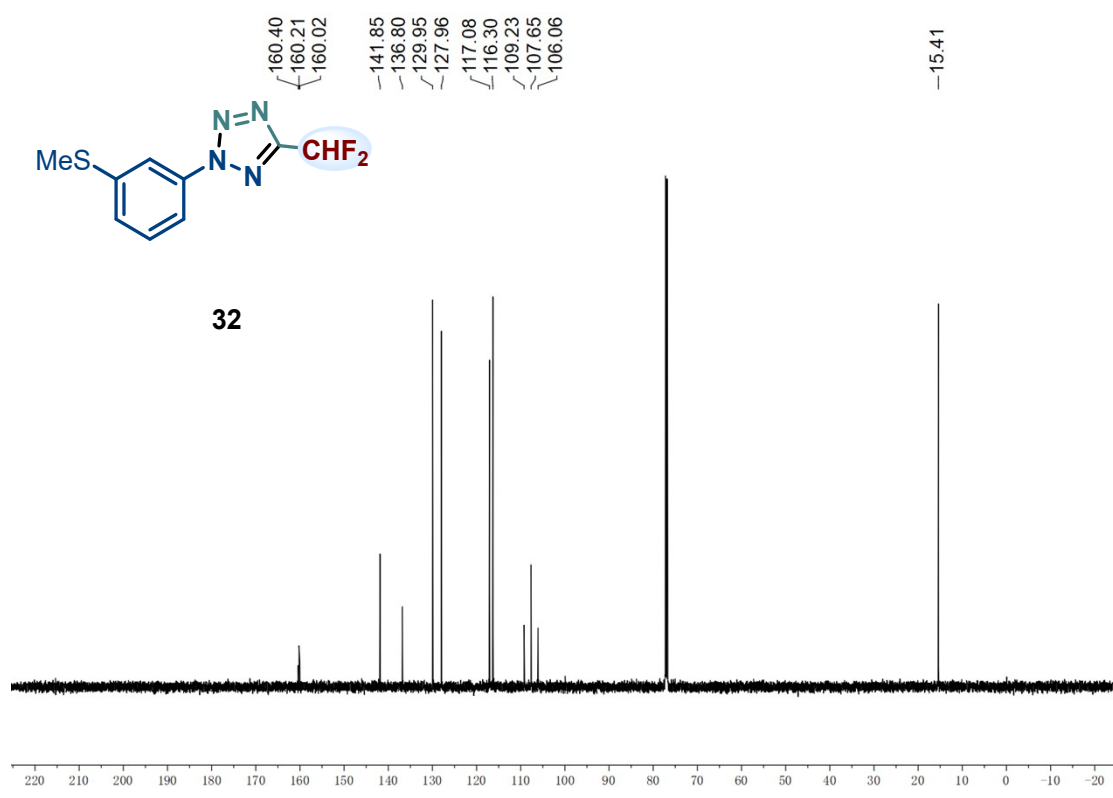

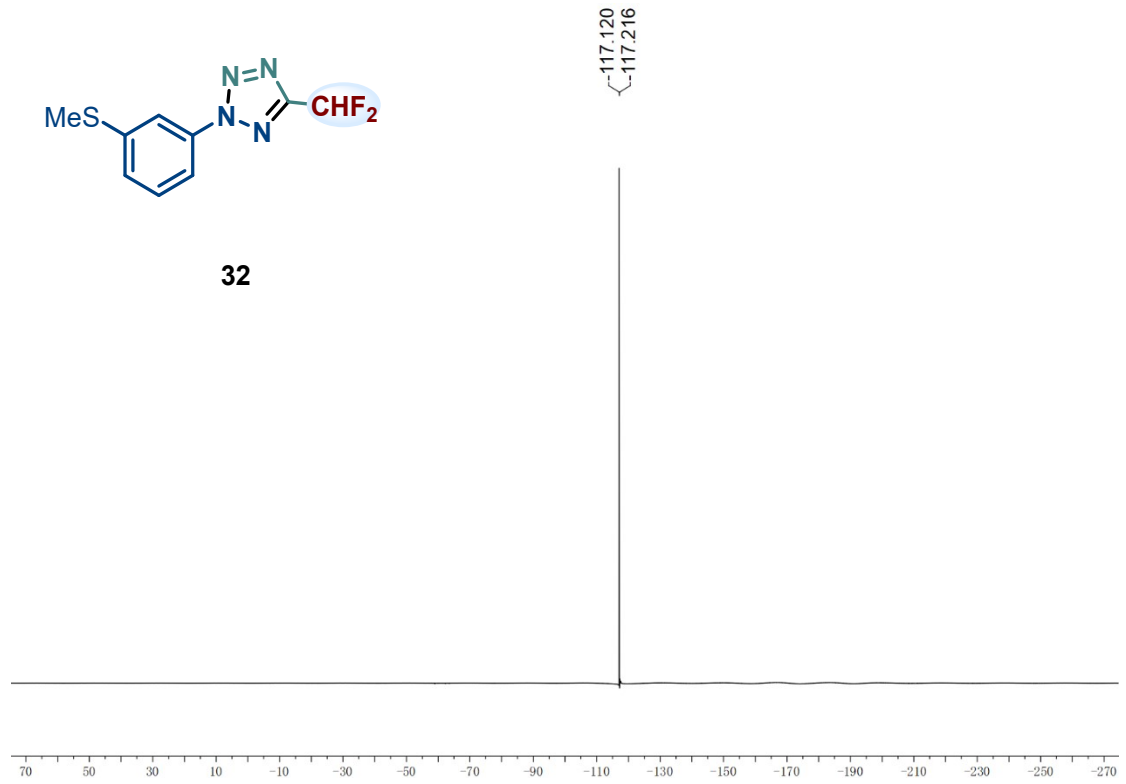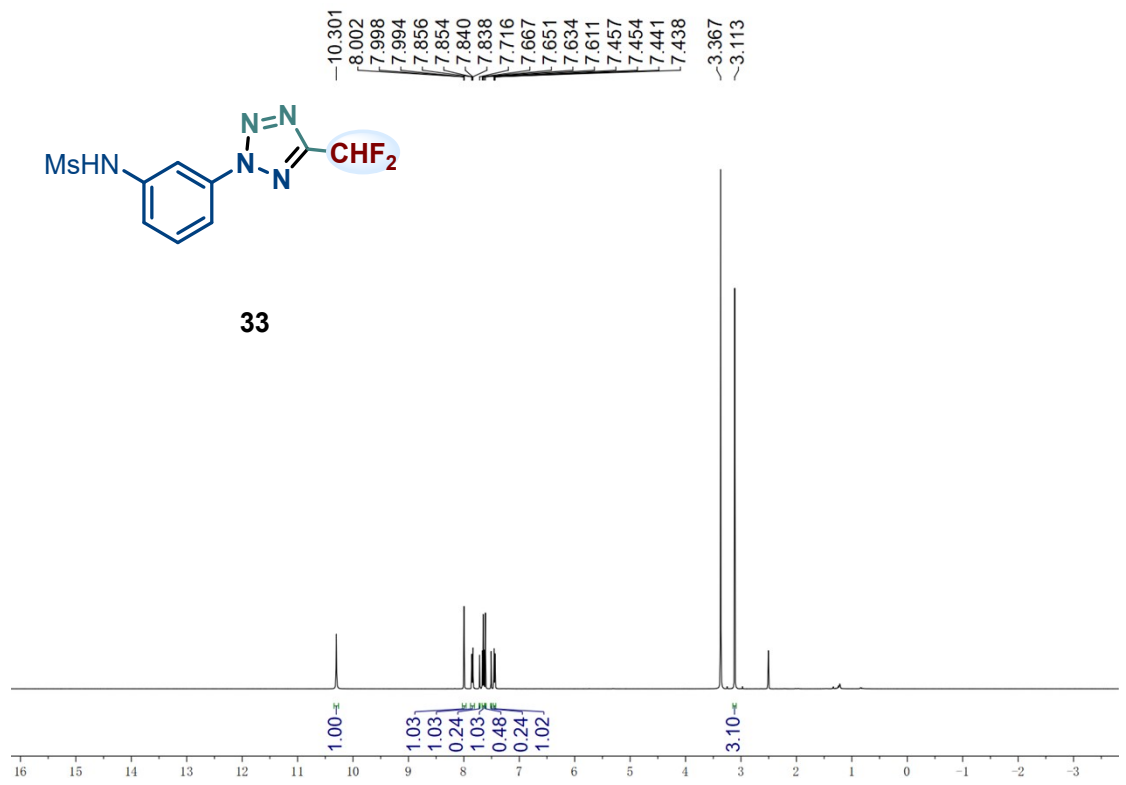

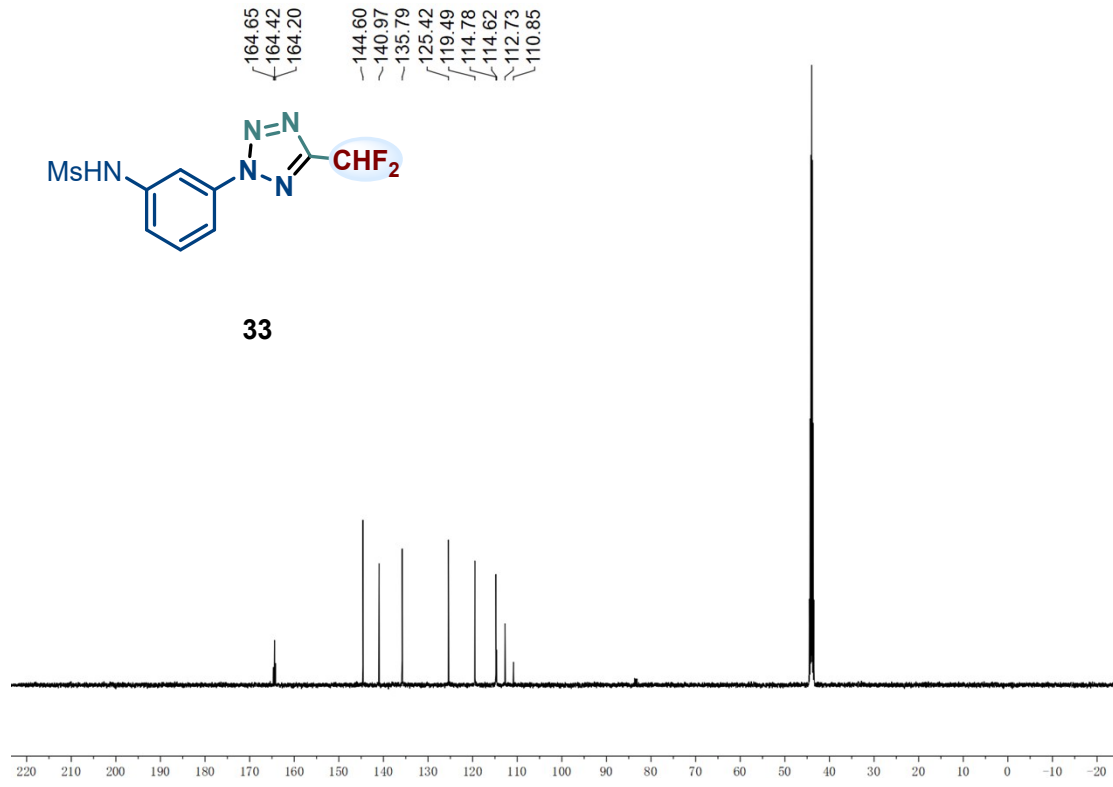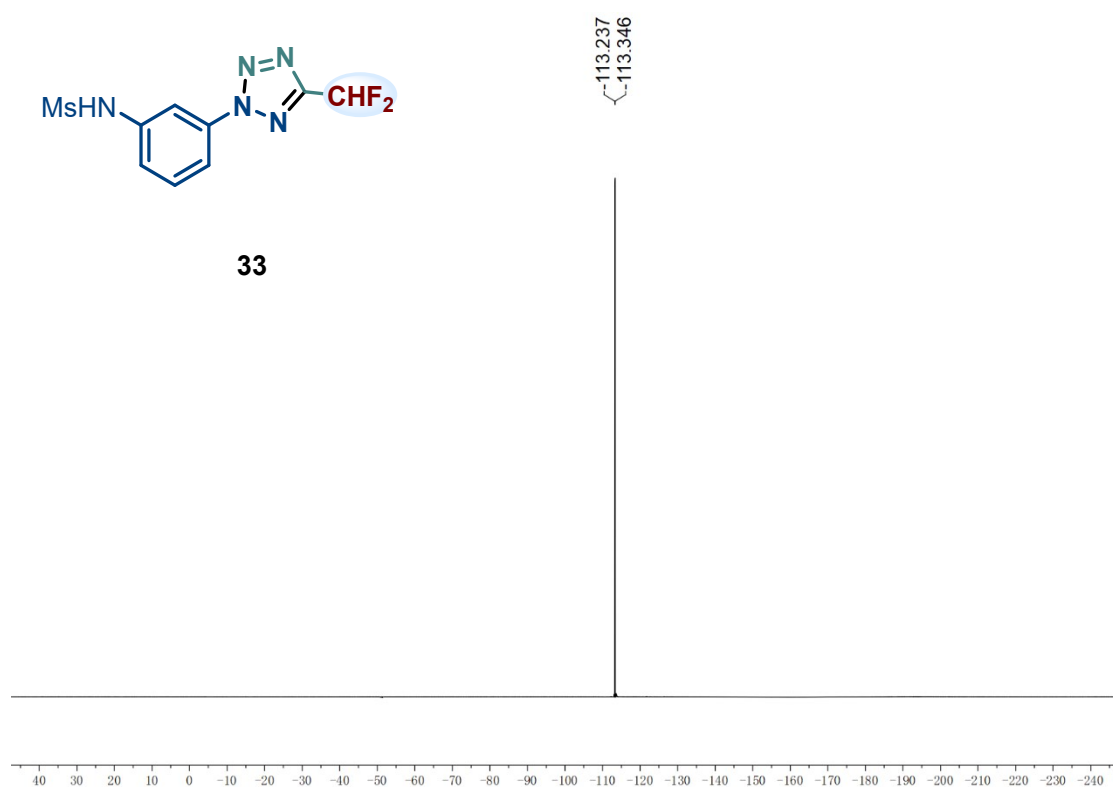

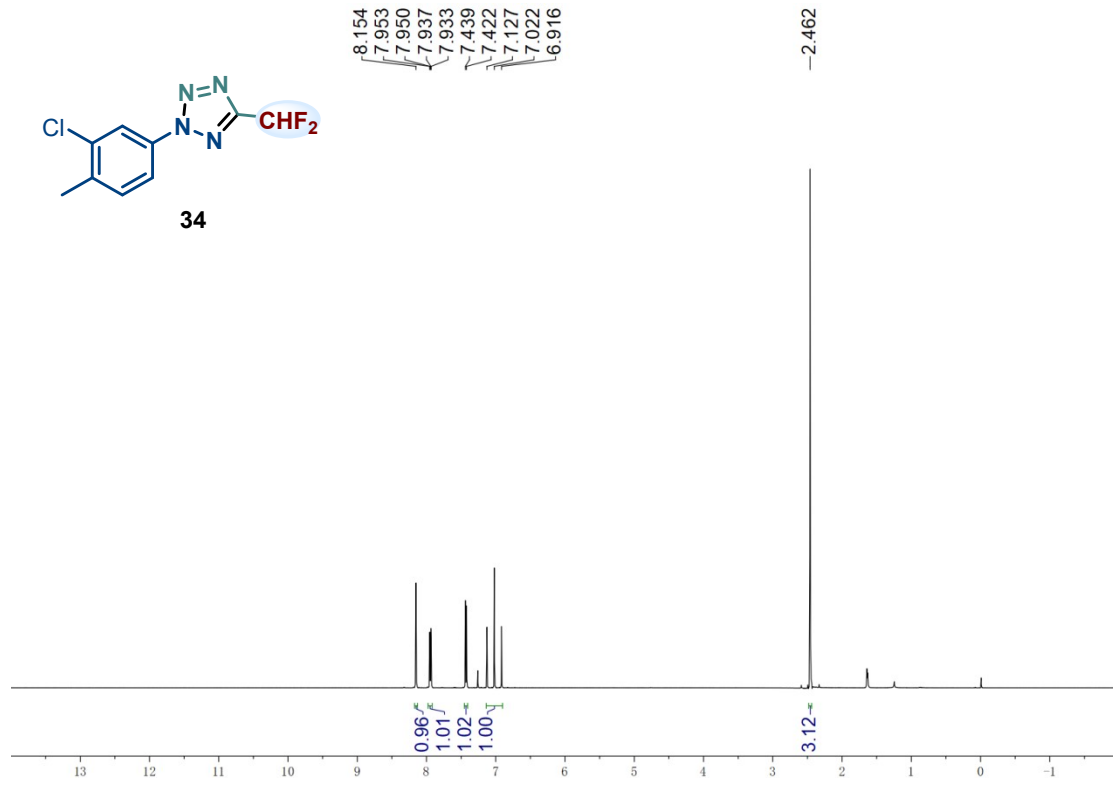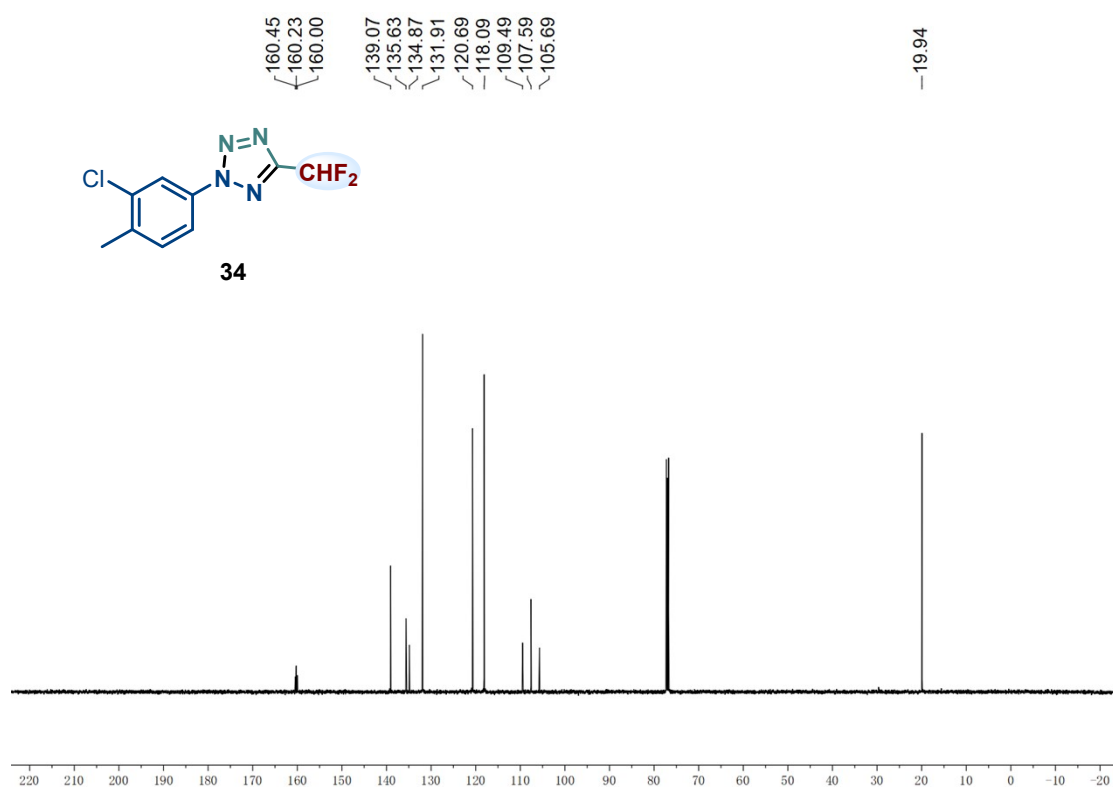



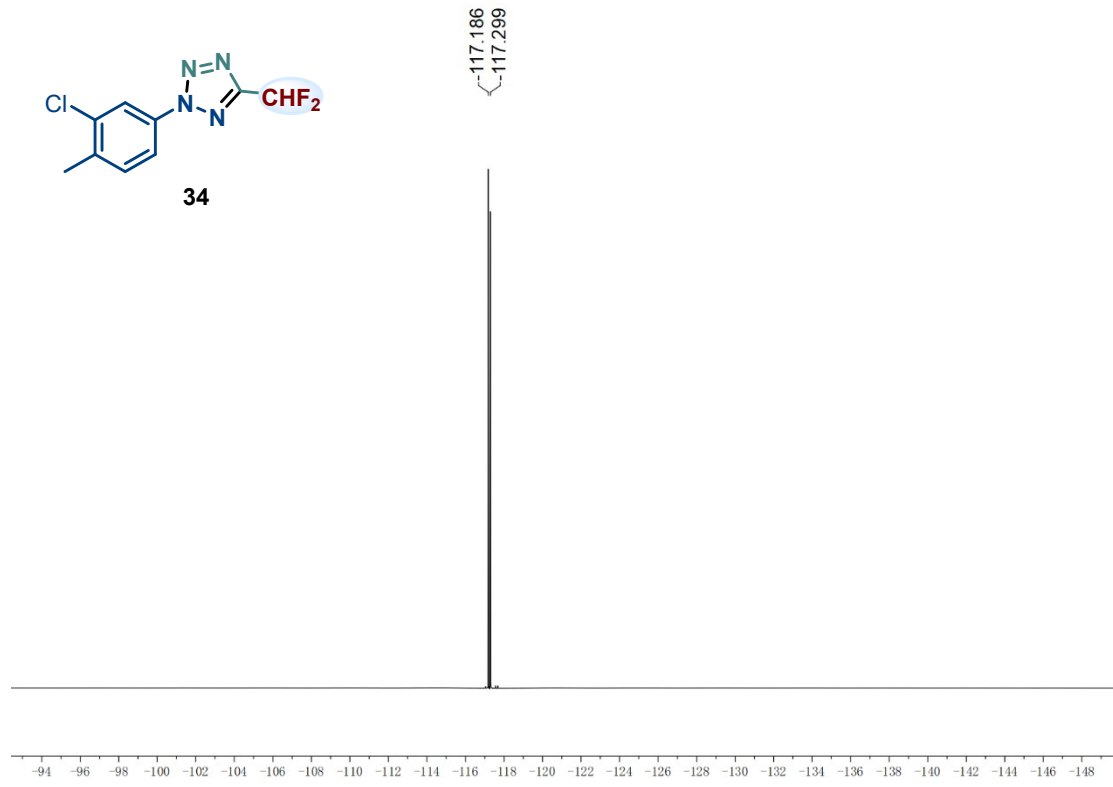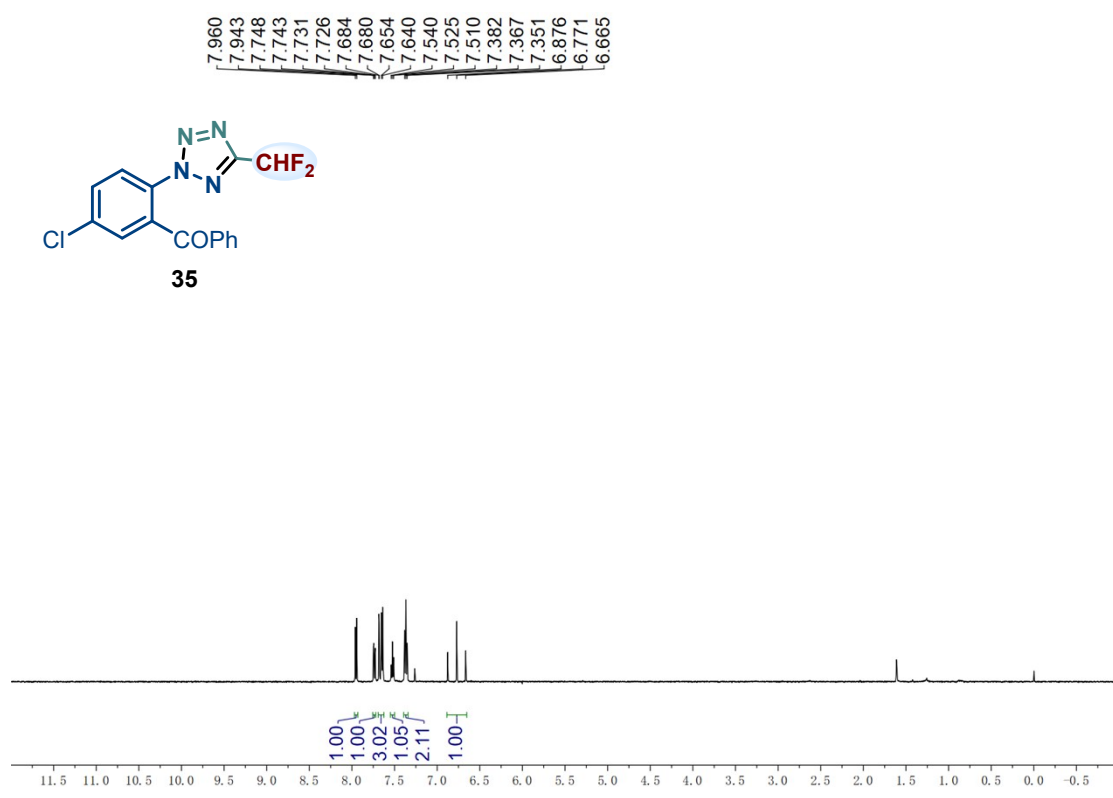

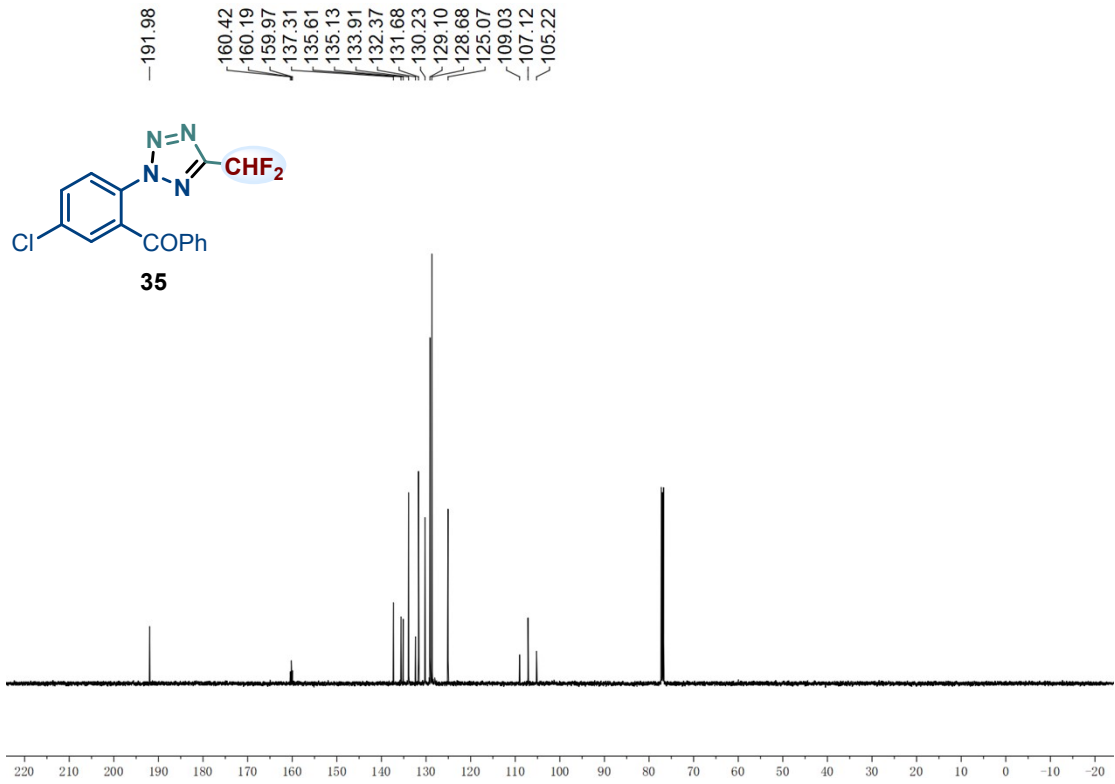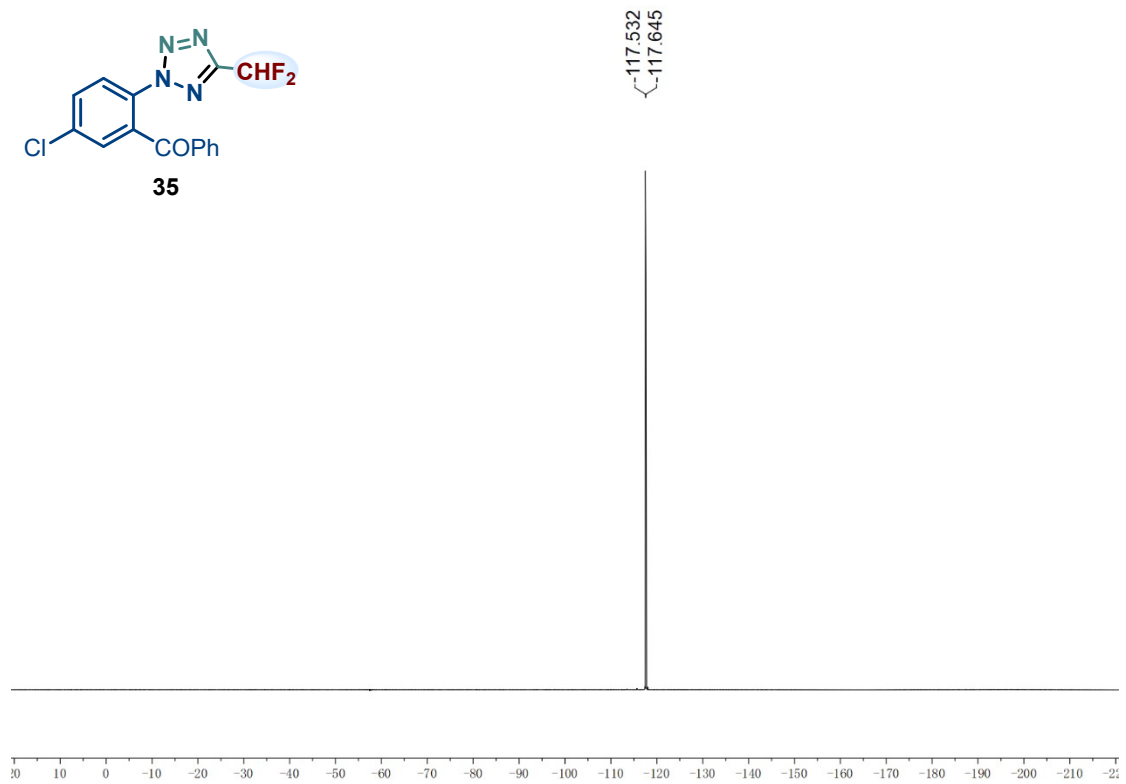

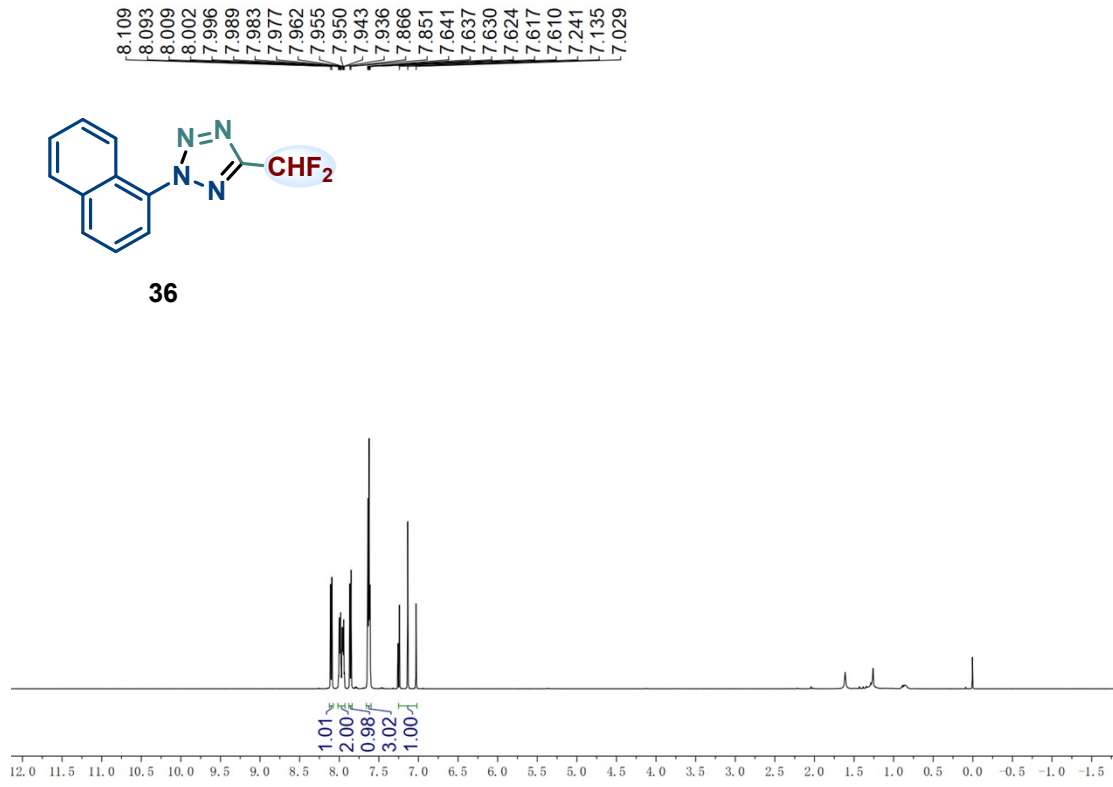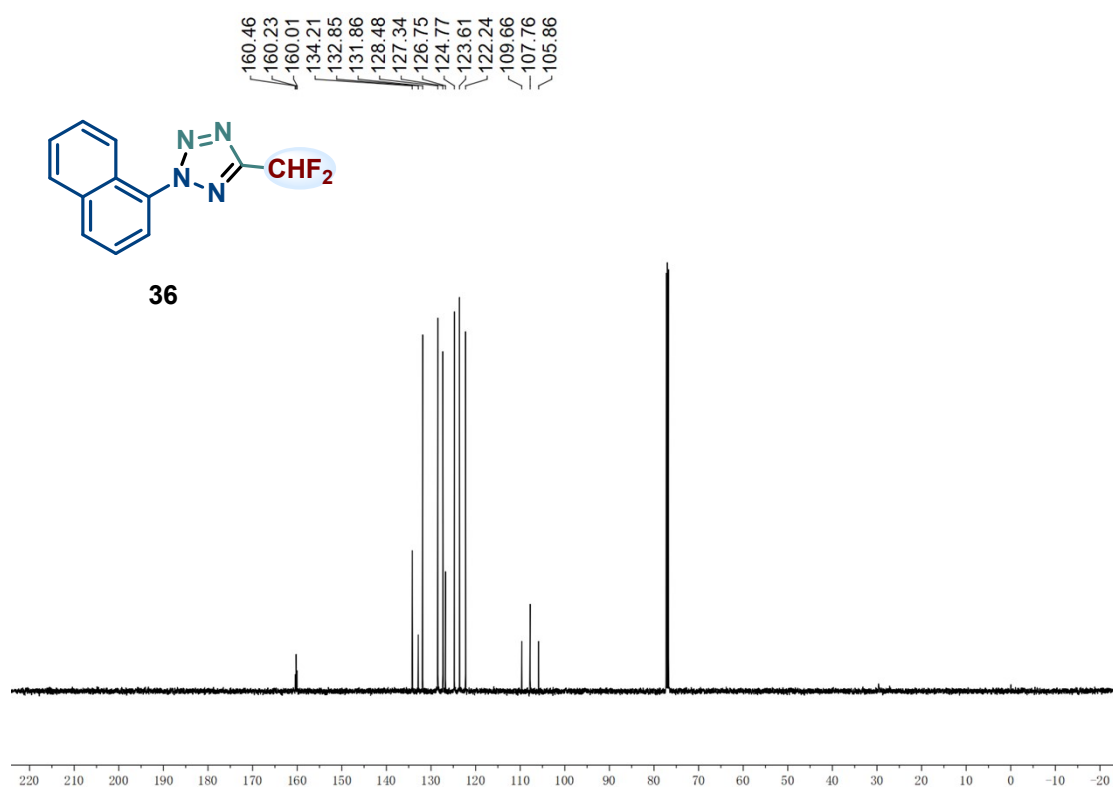

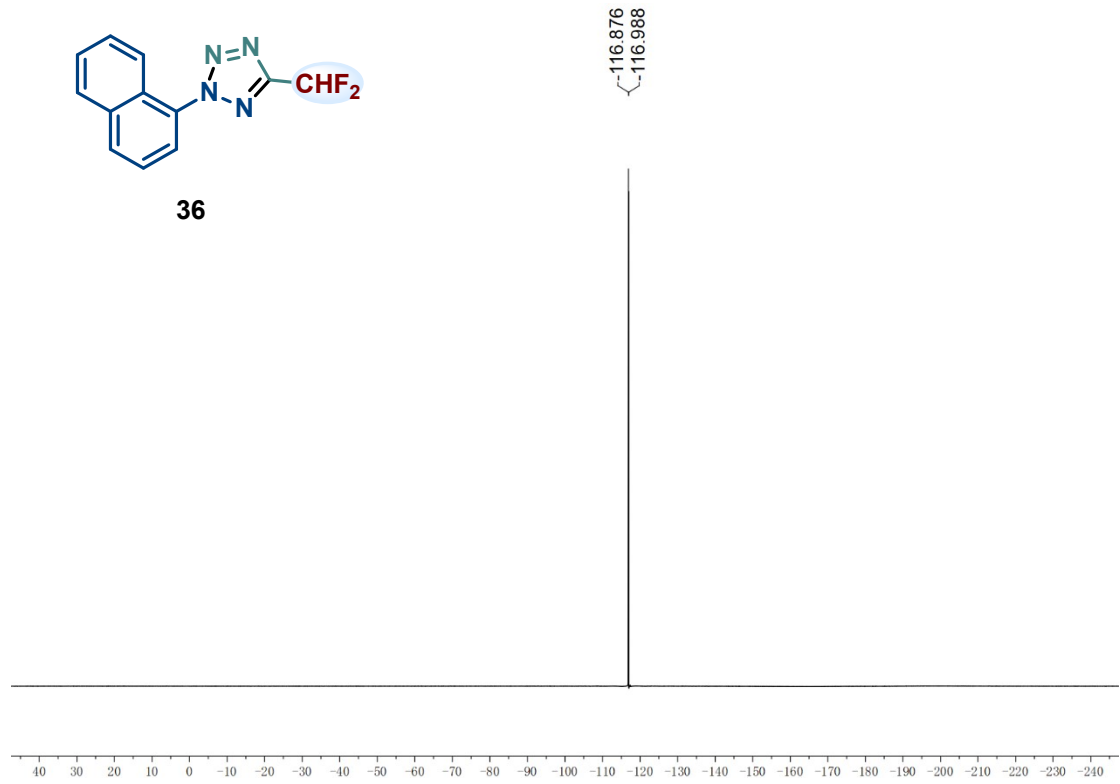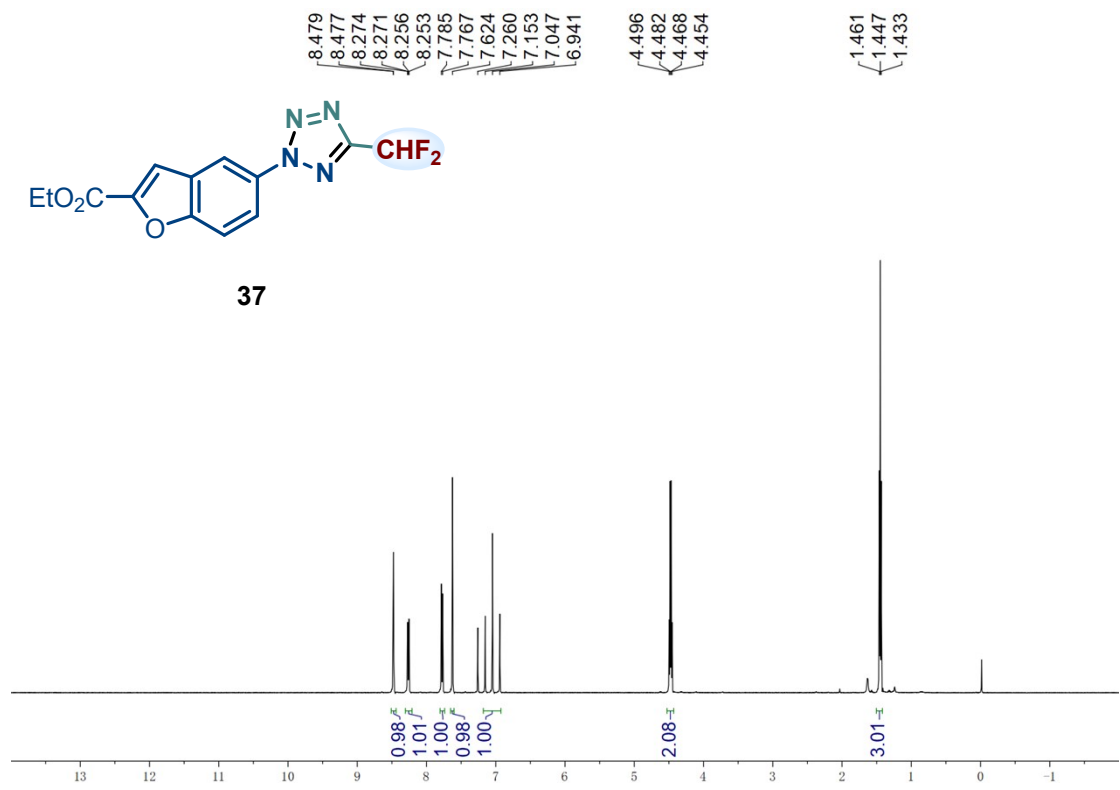

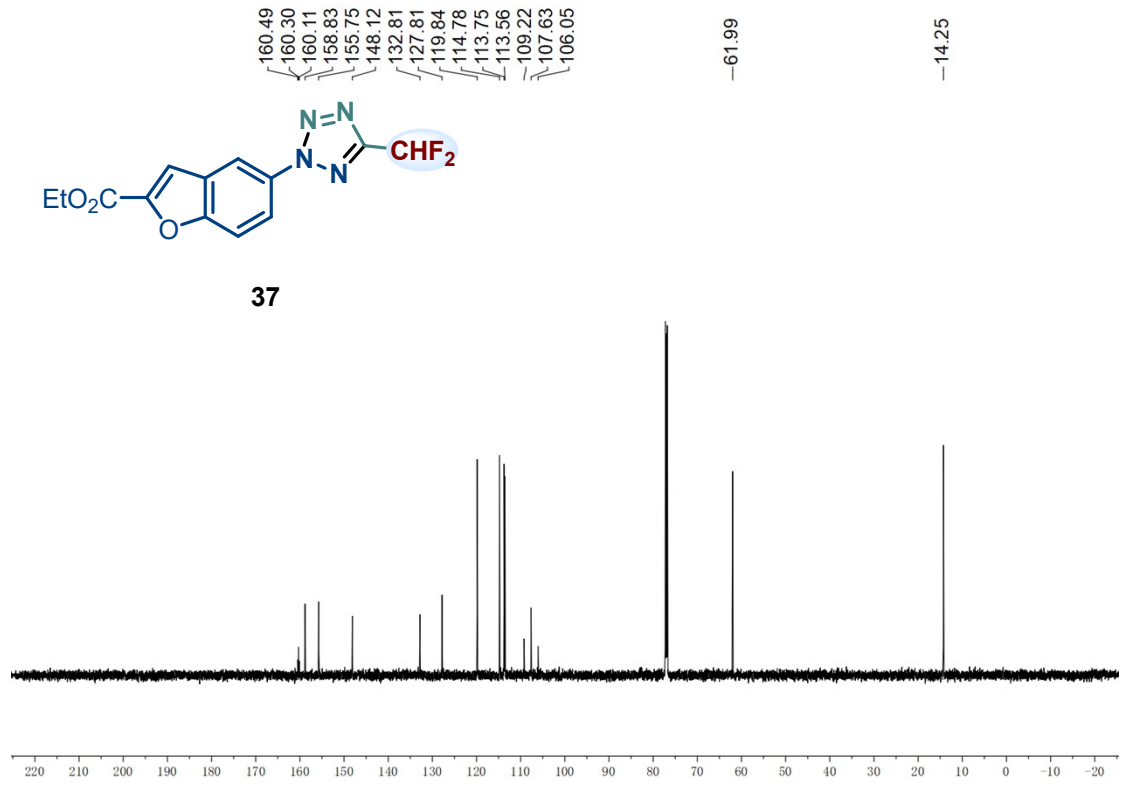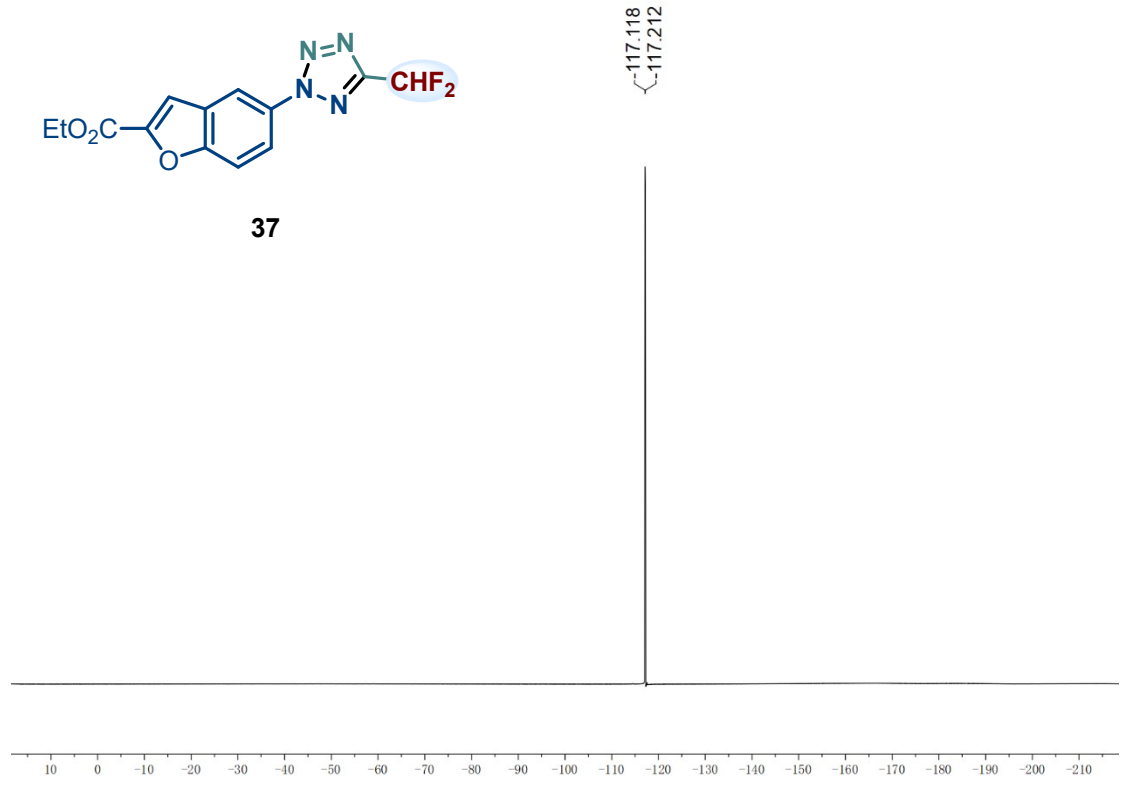

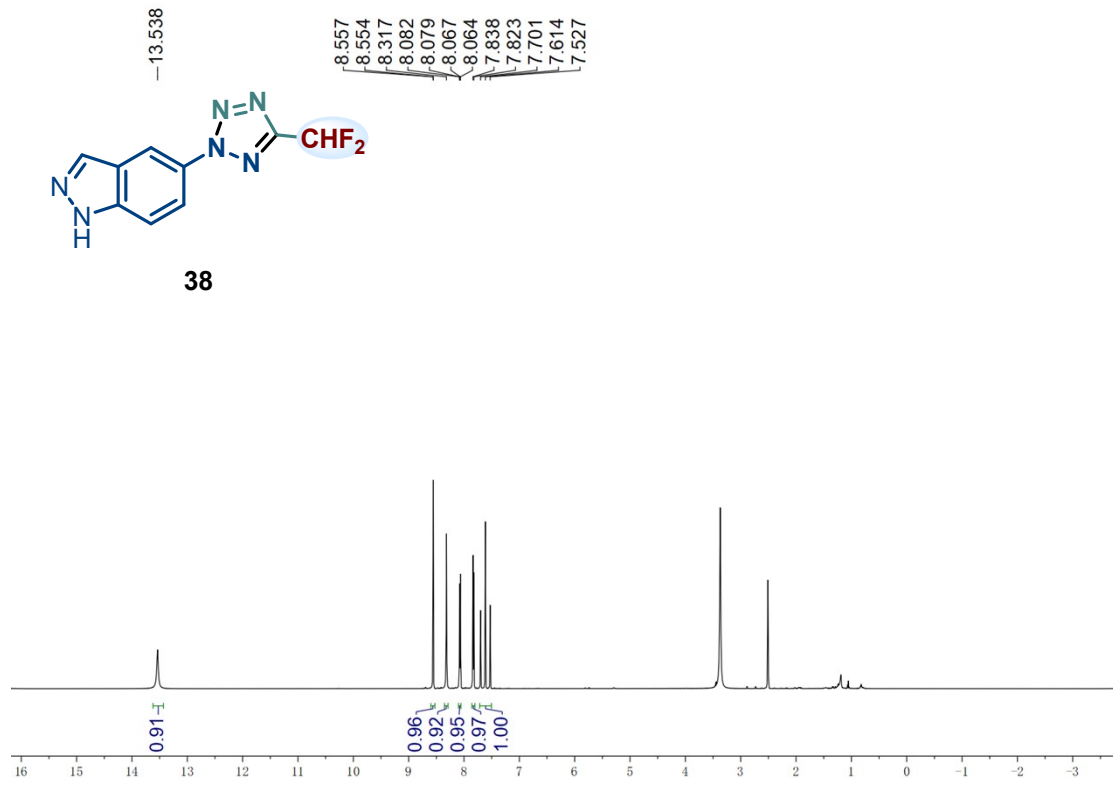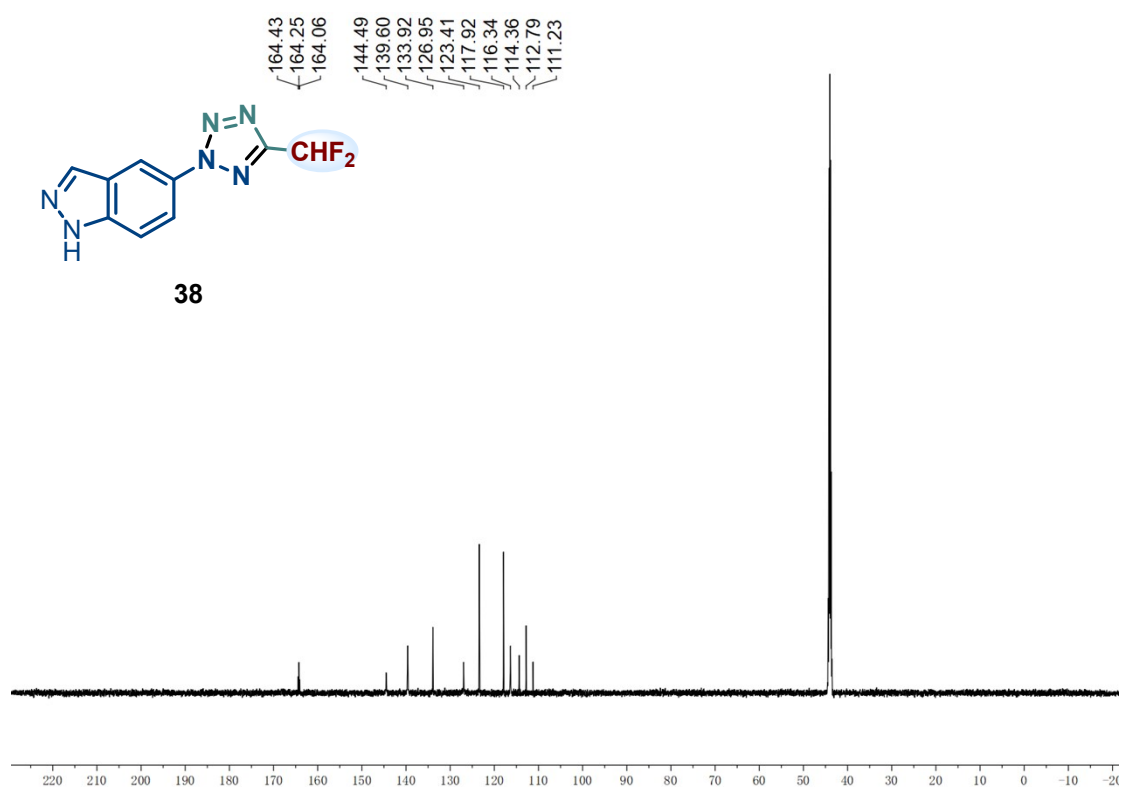

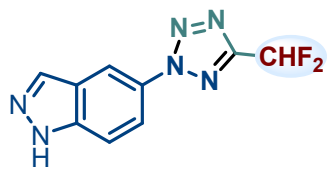

38

117.783  
117.877

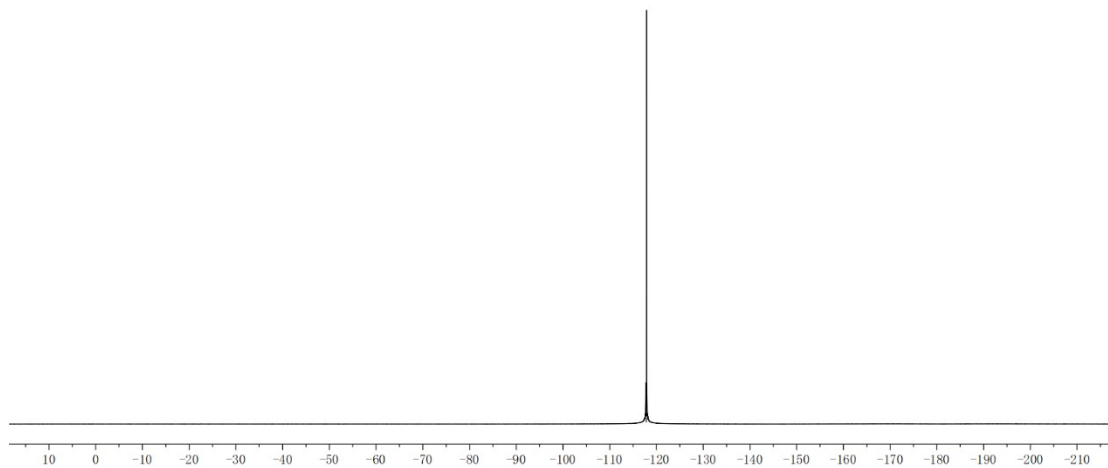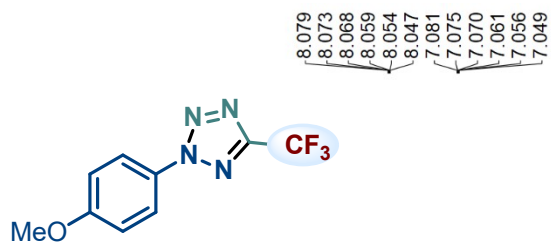

39

8.079  
8.073  
8.068  
8.059  
8.054  
8.047  
7.081  
7.075  
7.070  
7.061  
7.056  
7.049

3.901

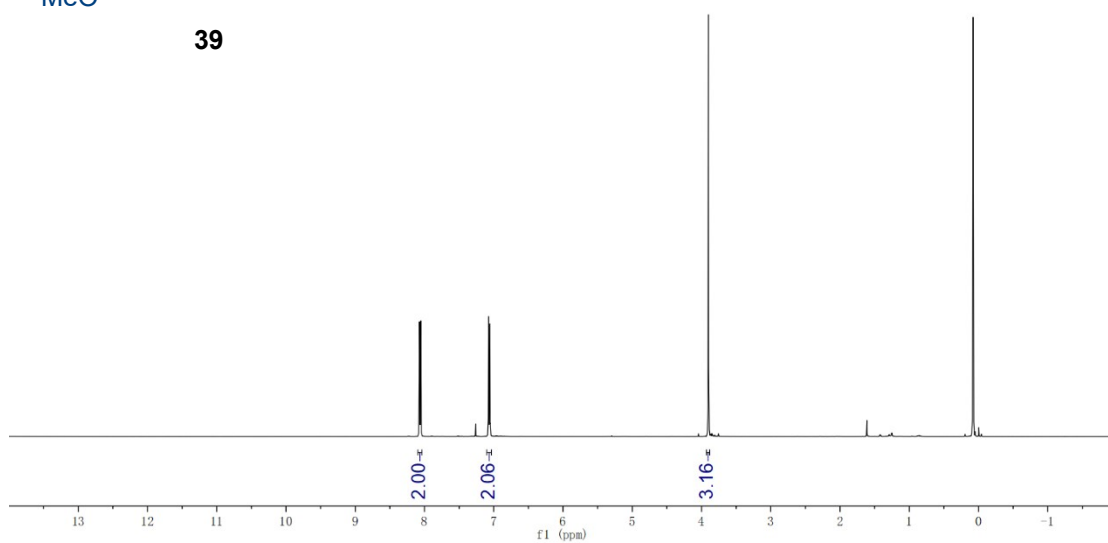

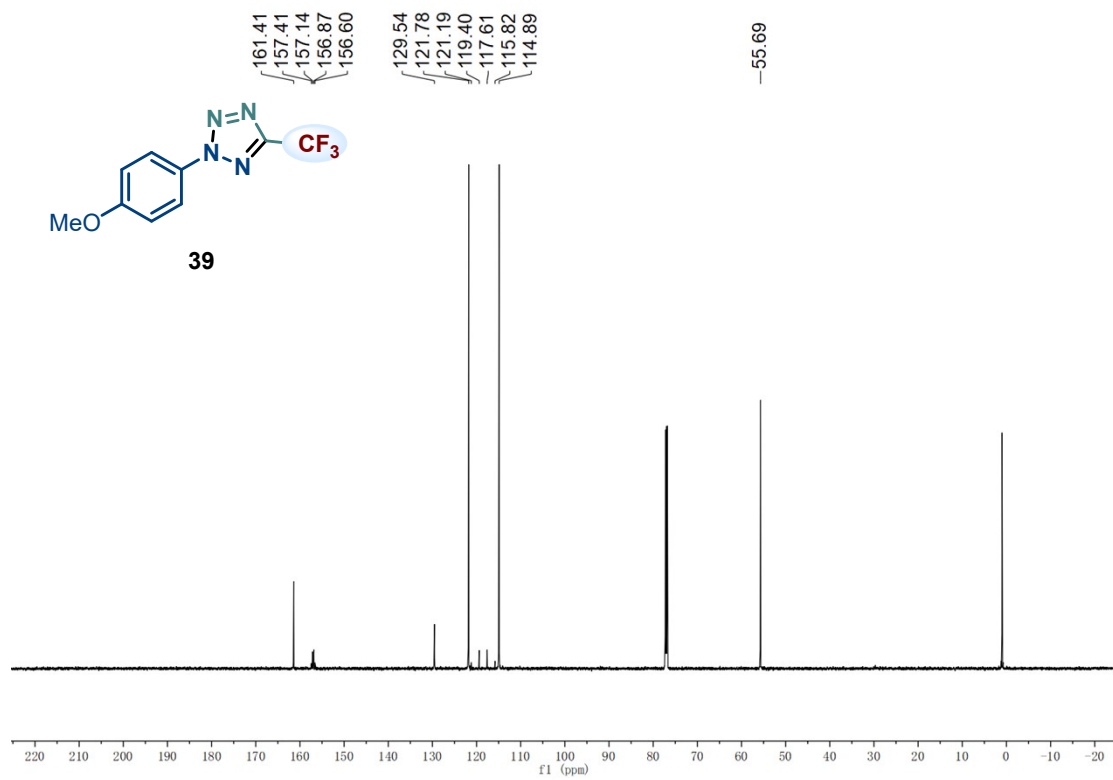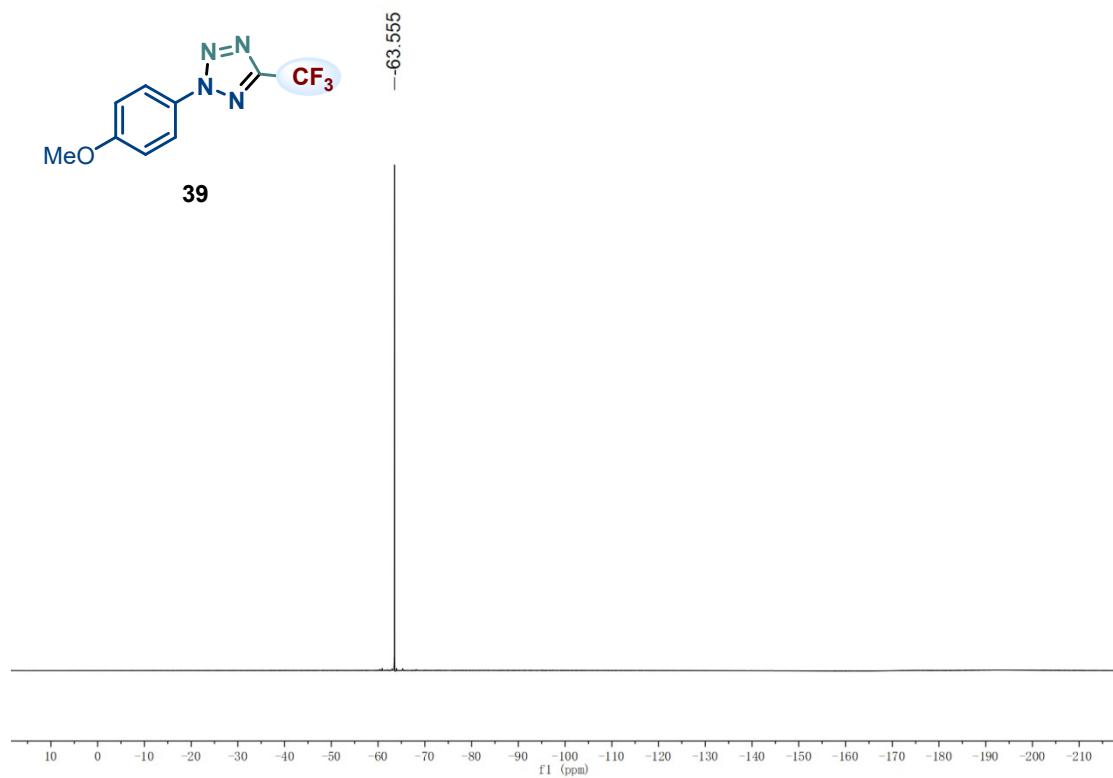



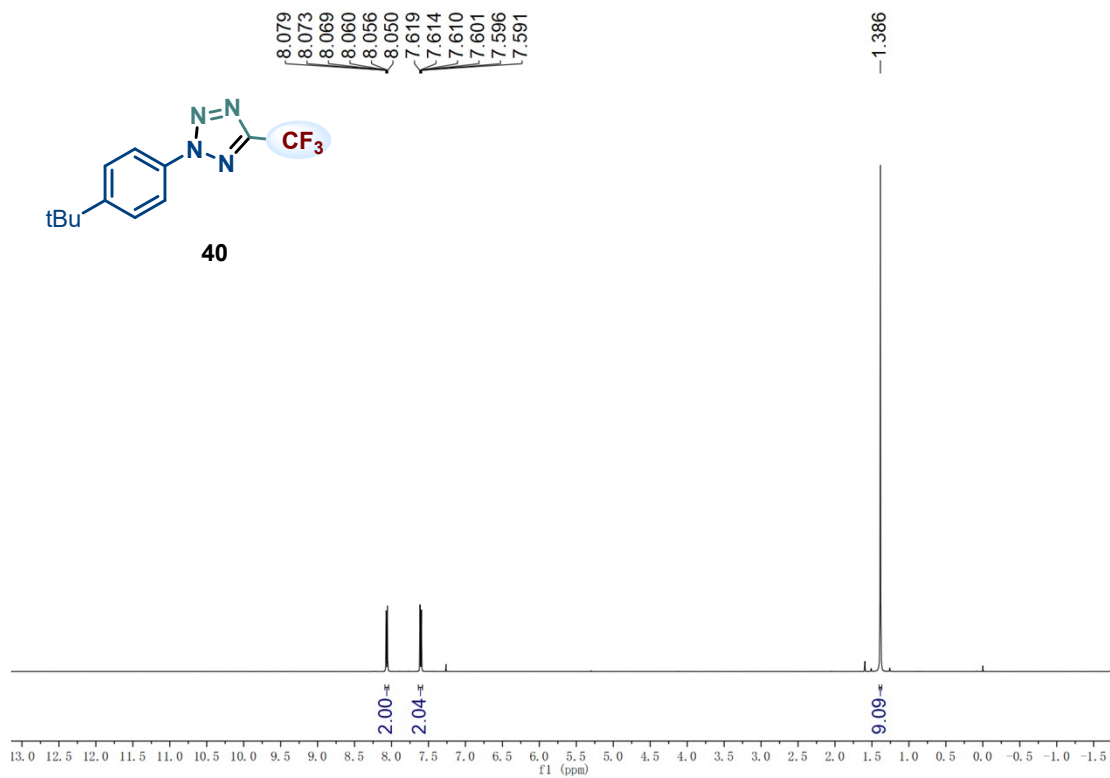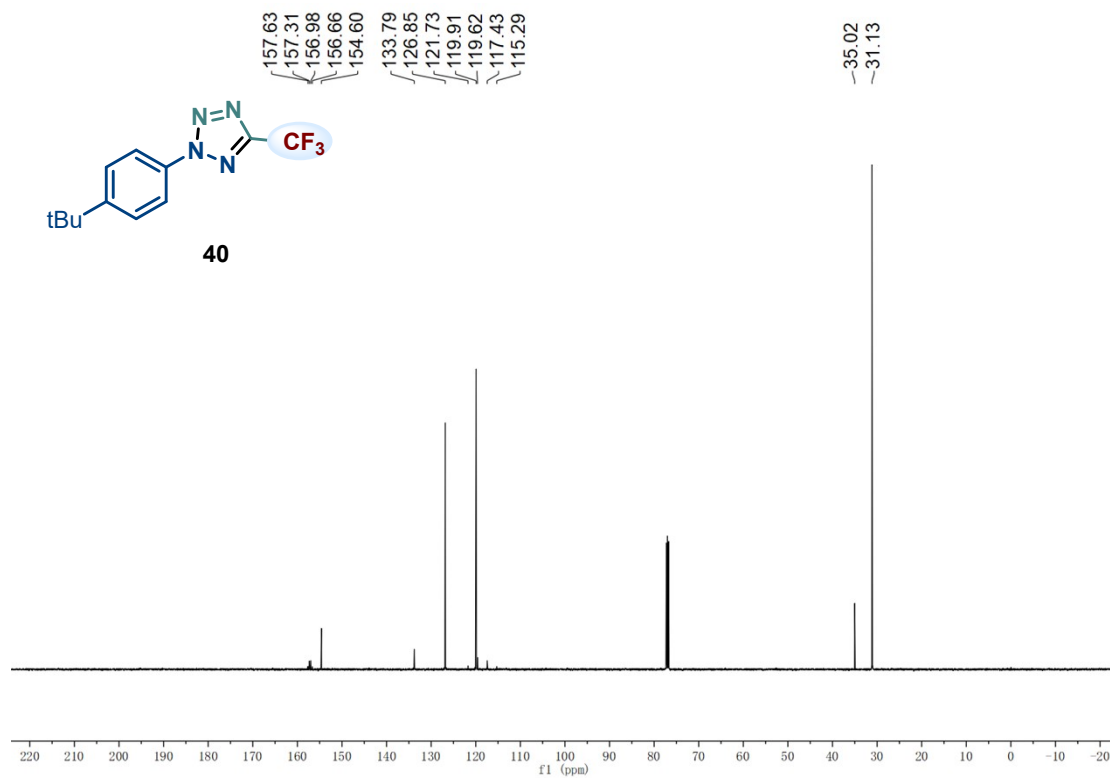

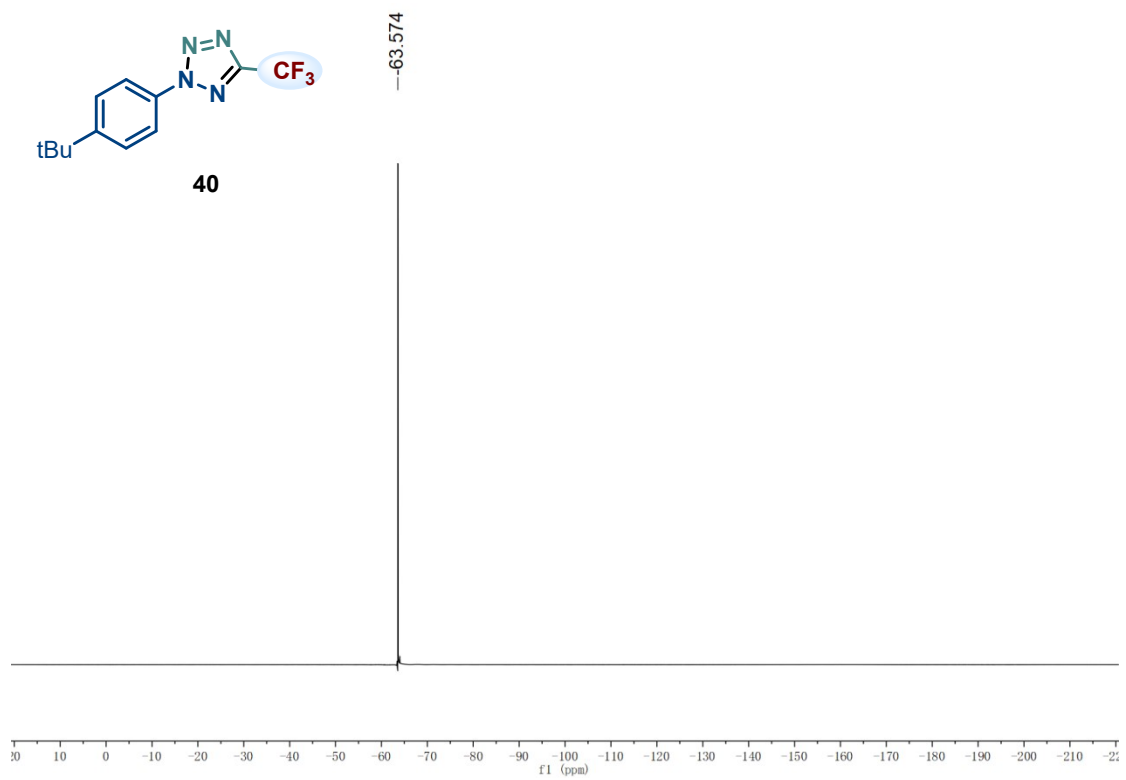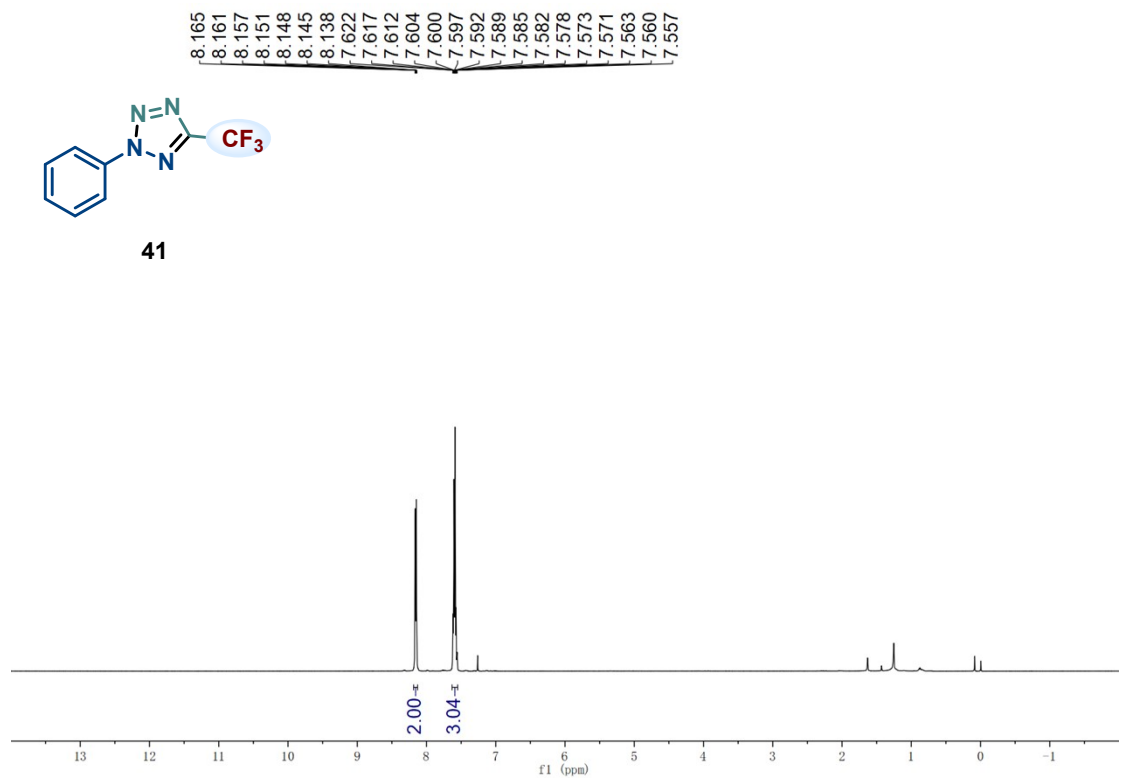

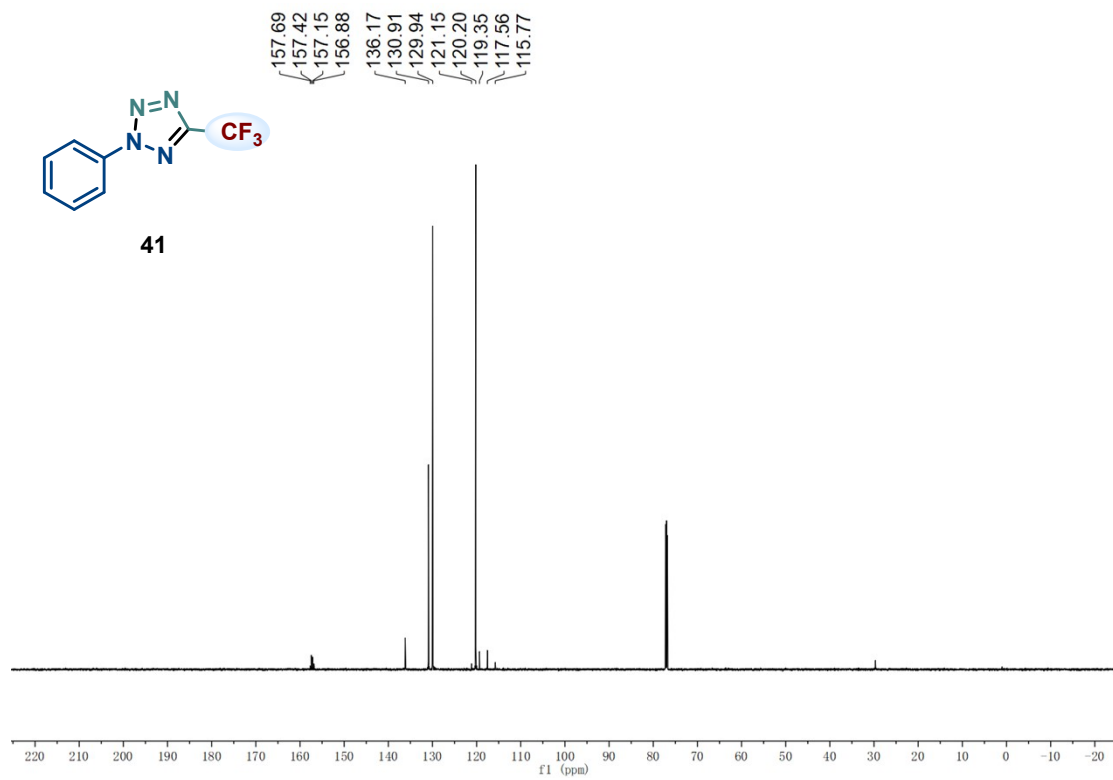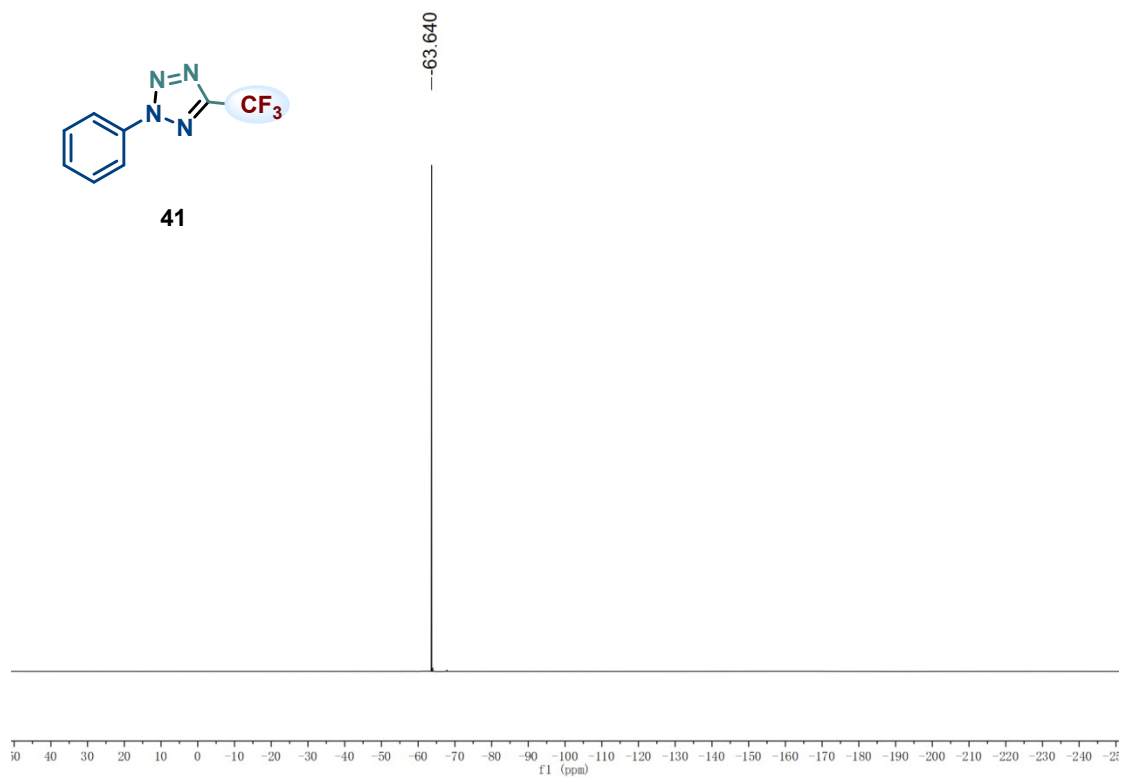

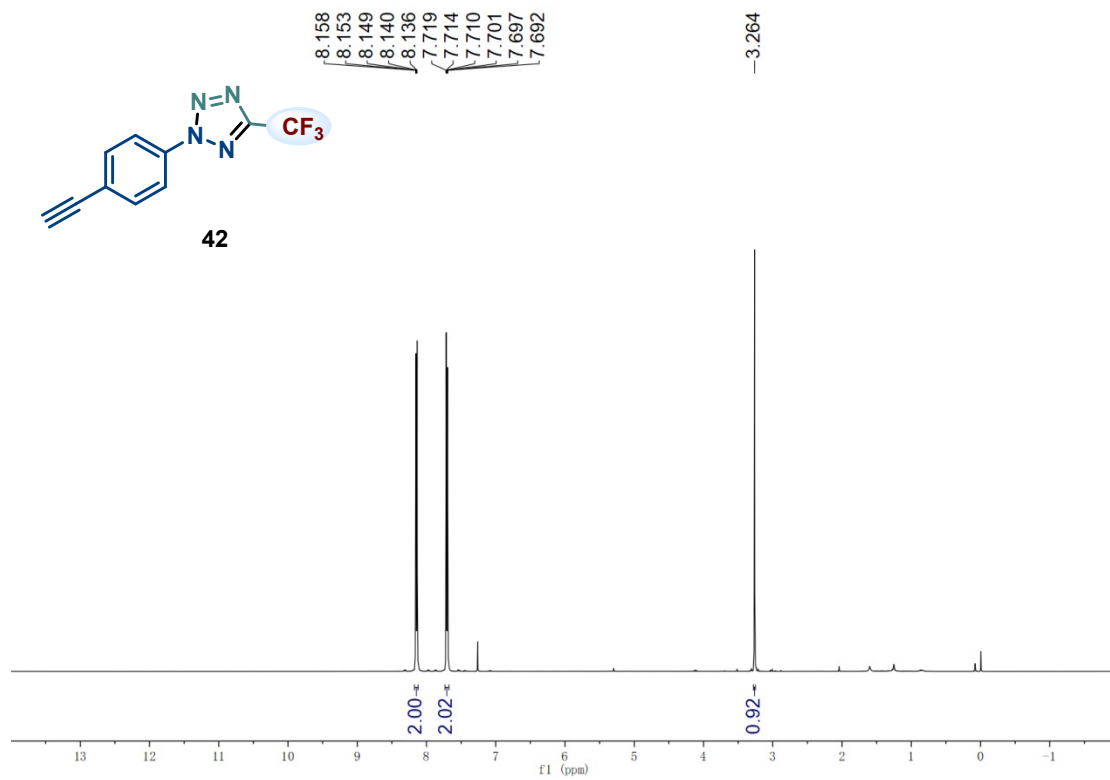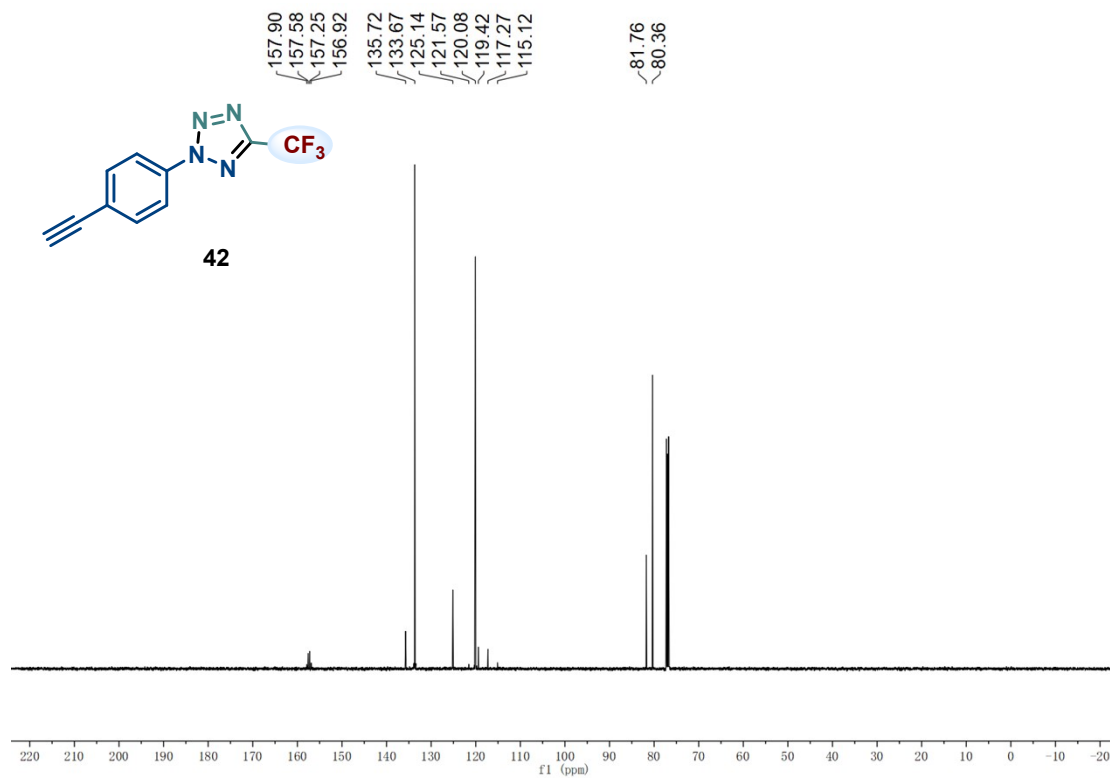

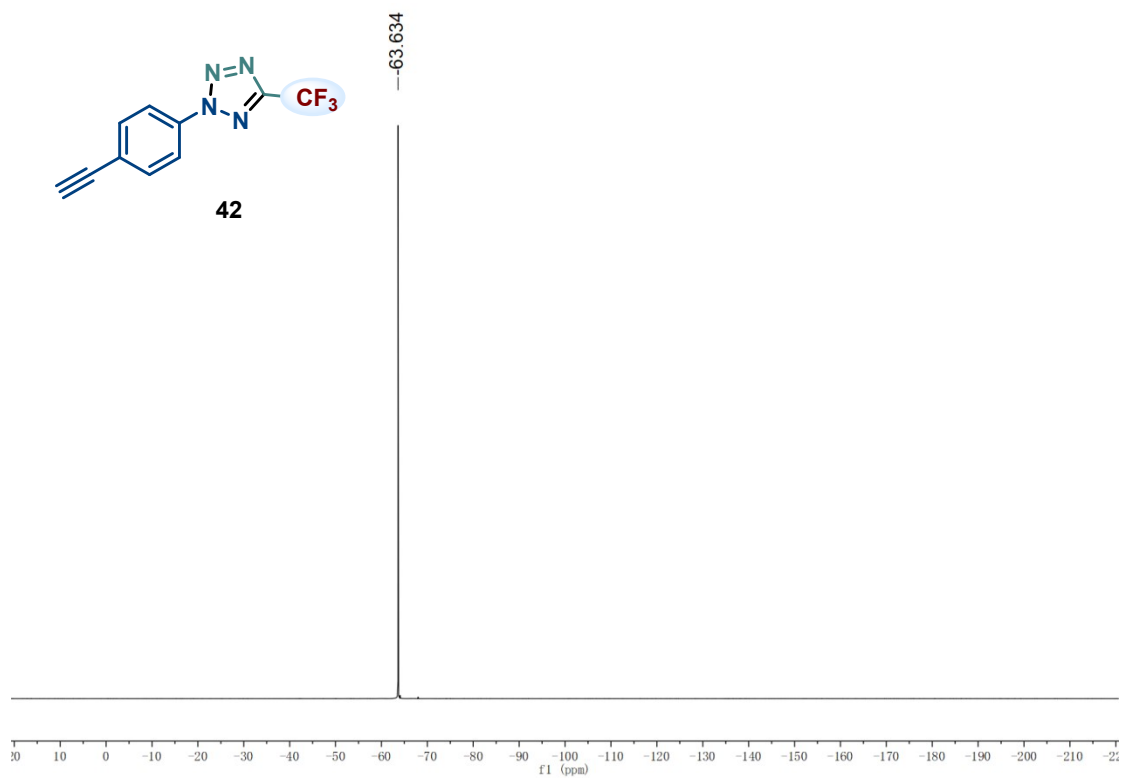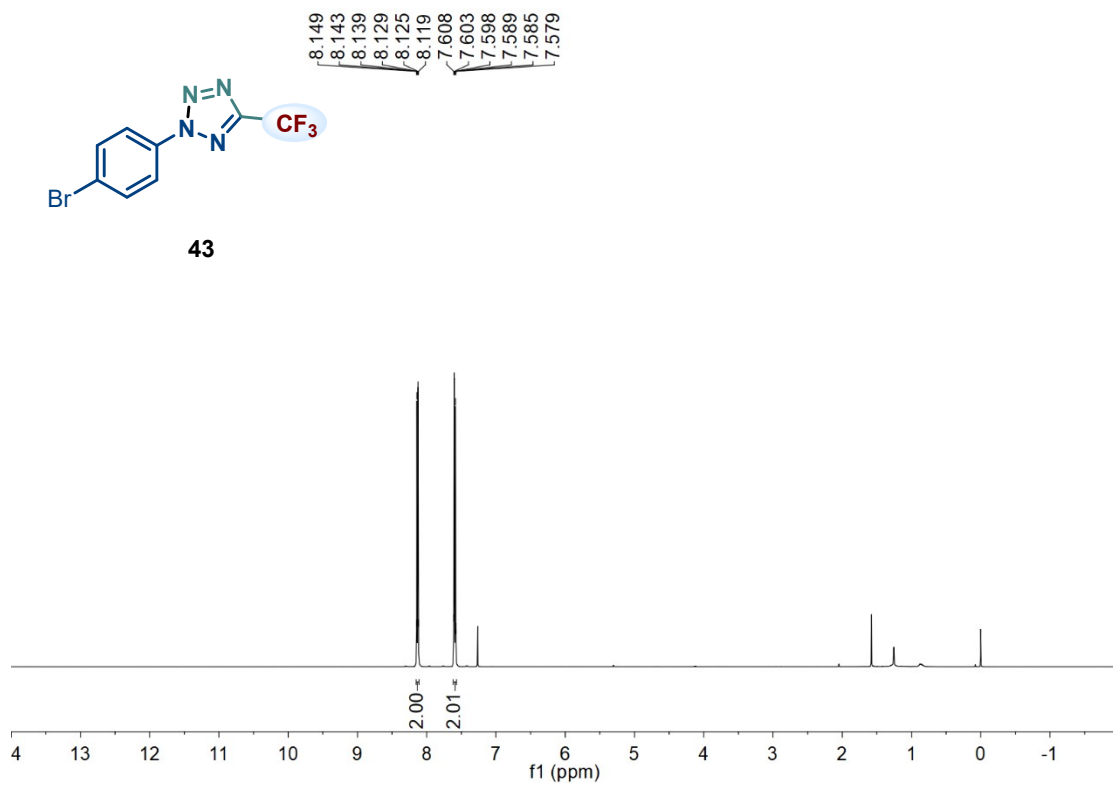

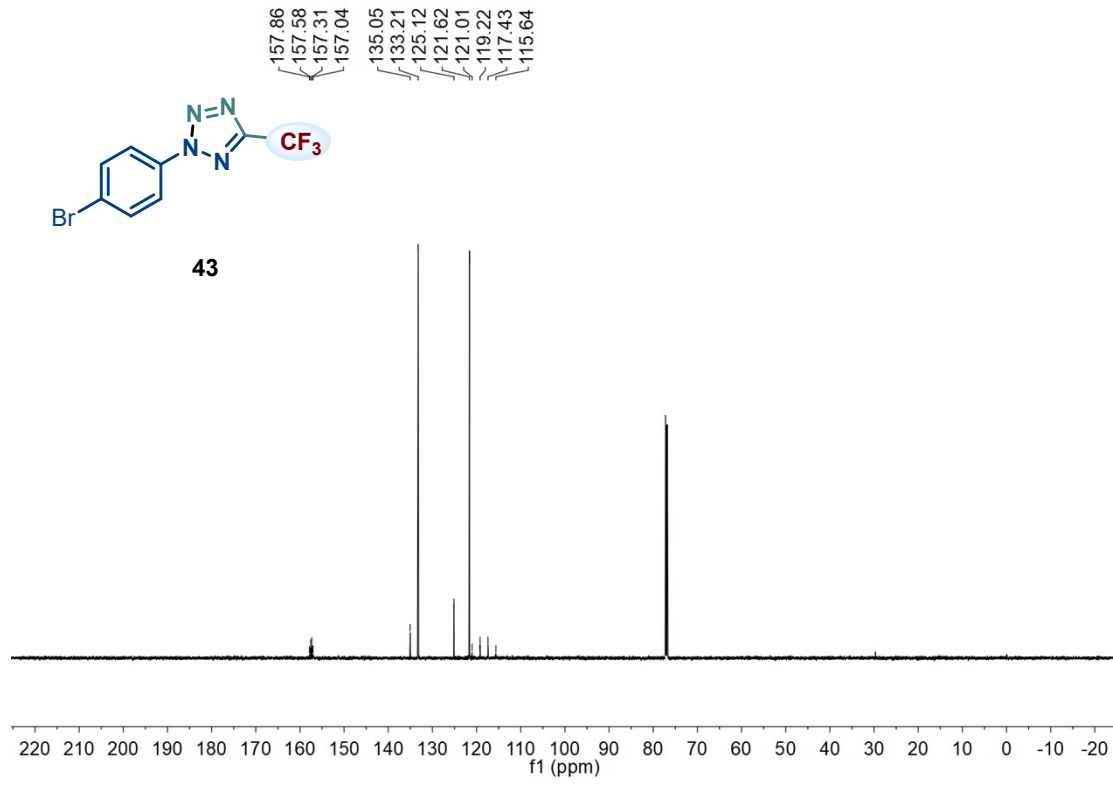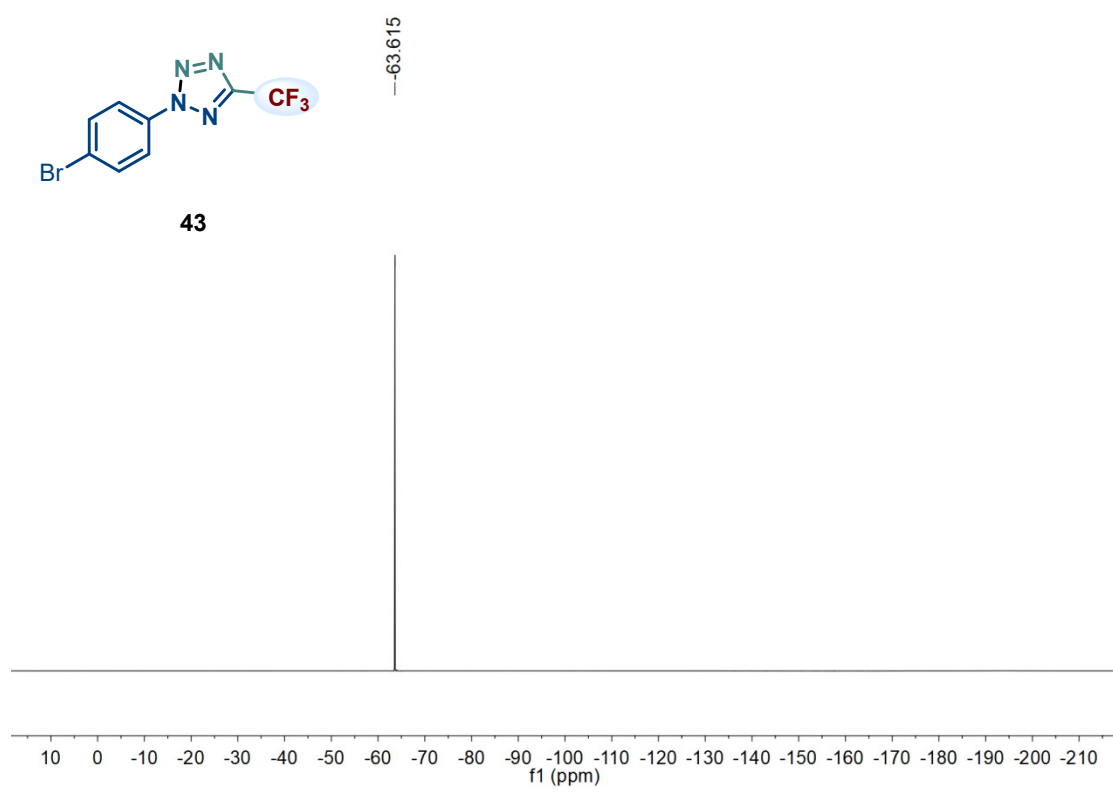

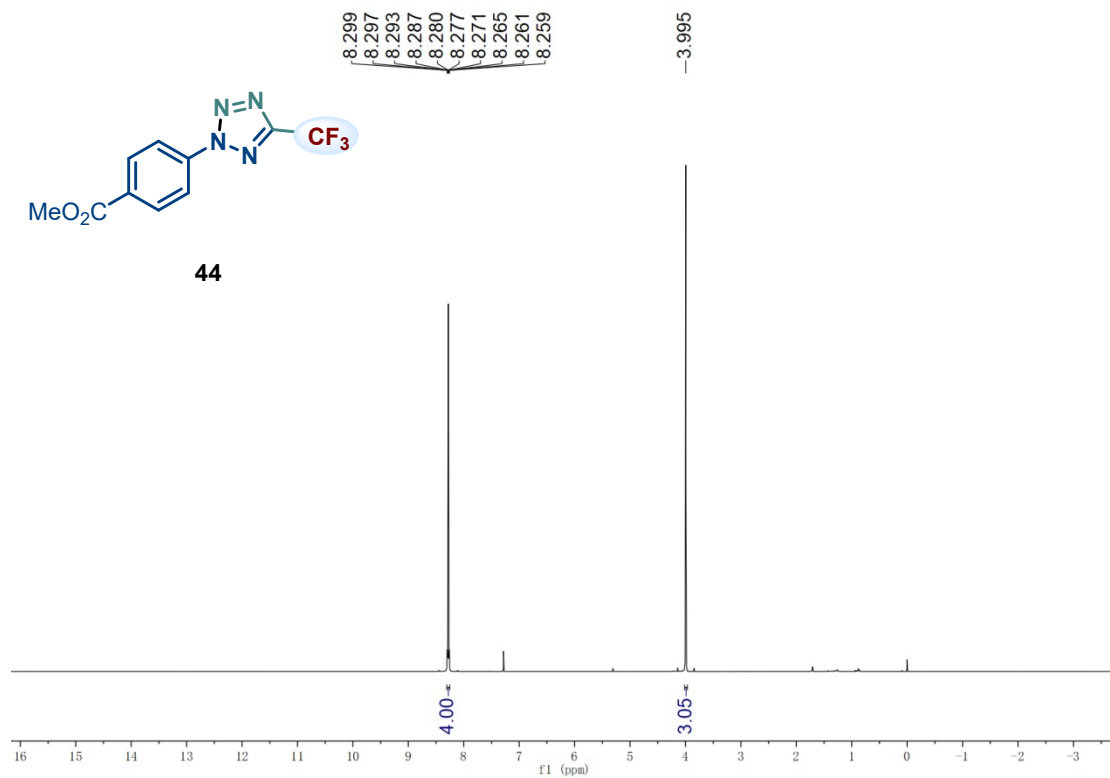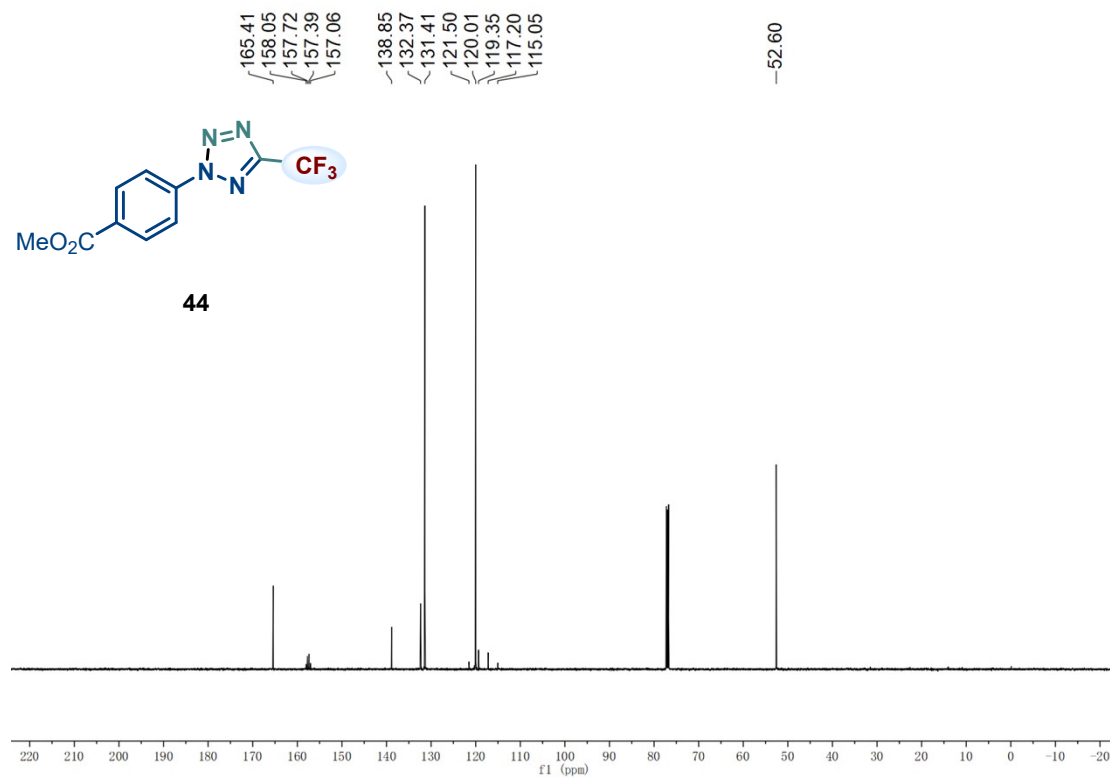

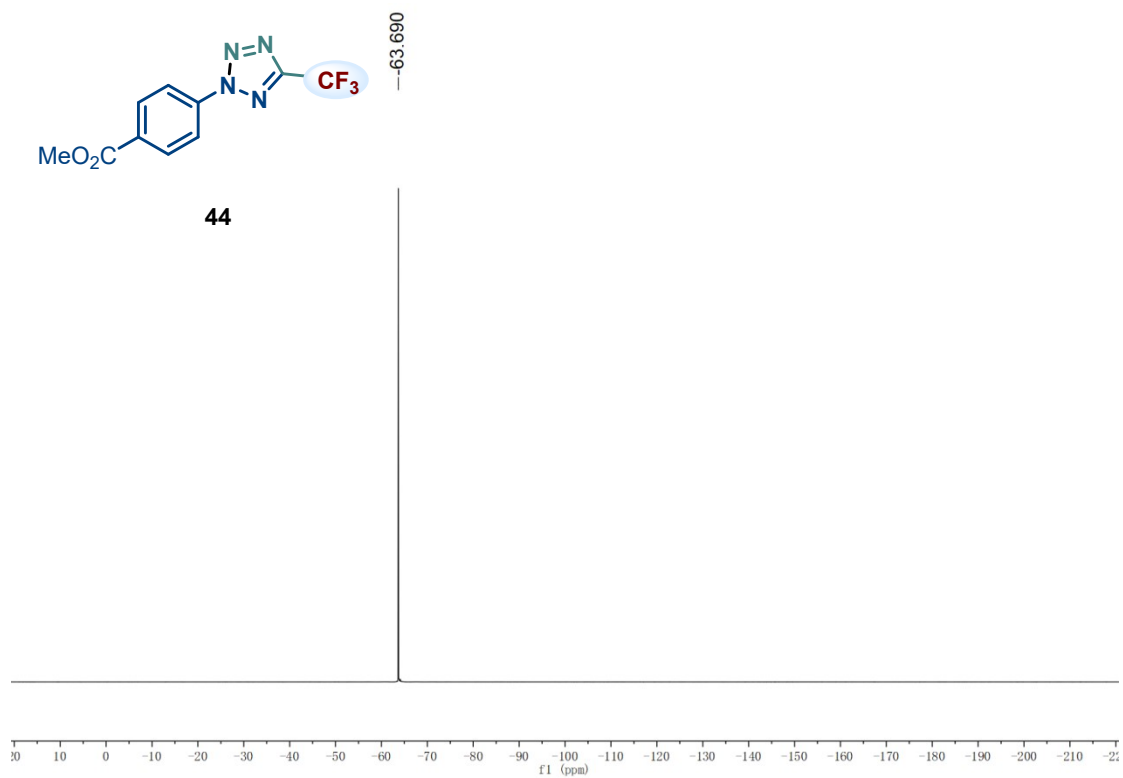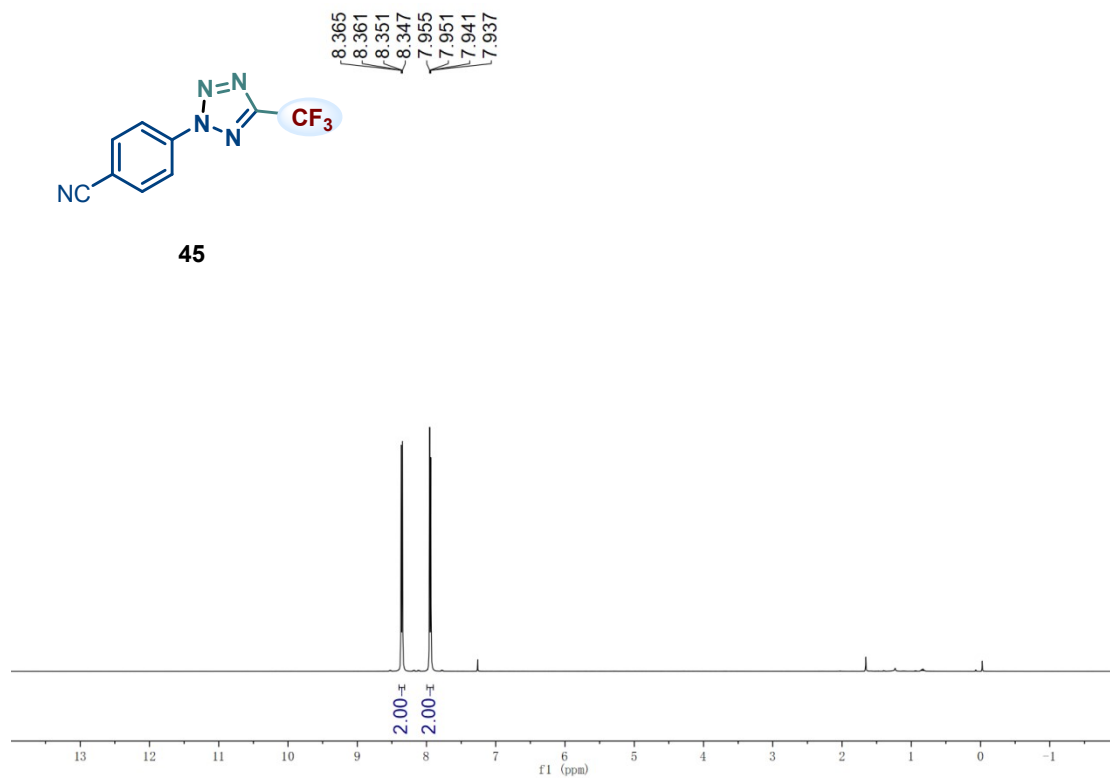



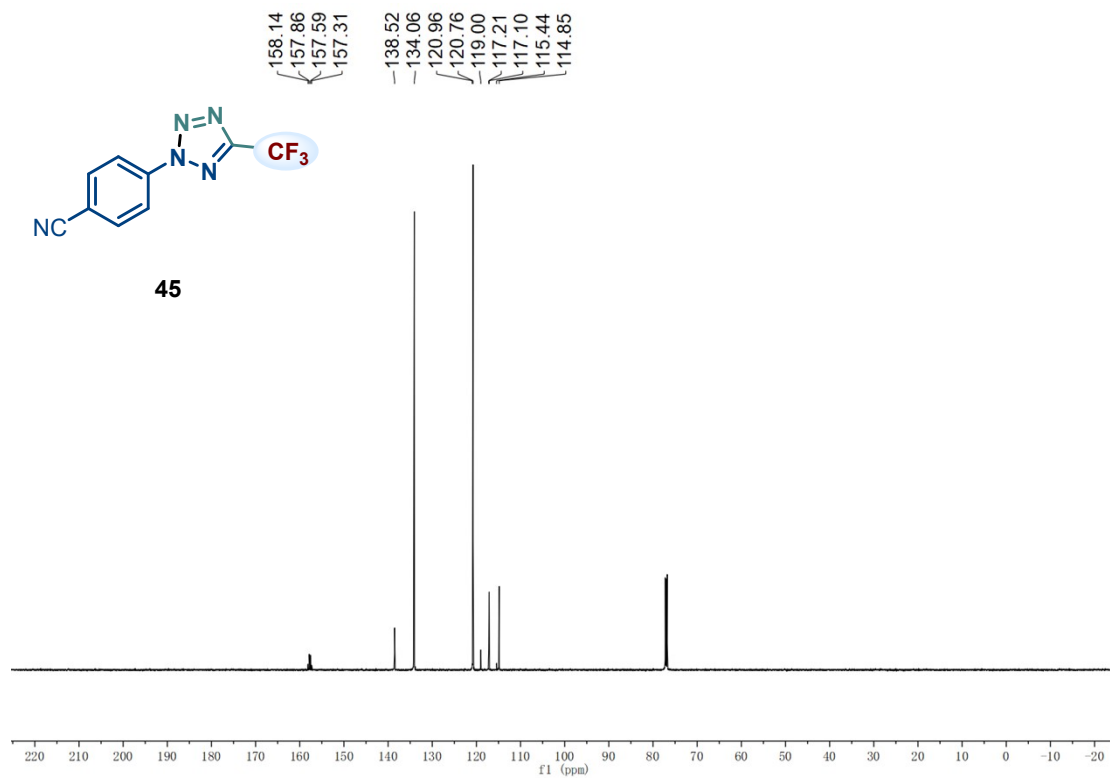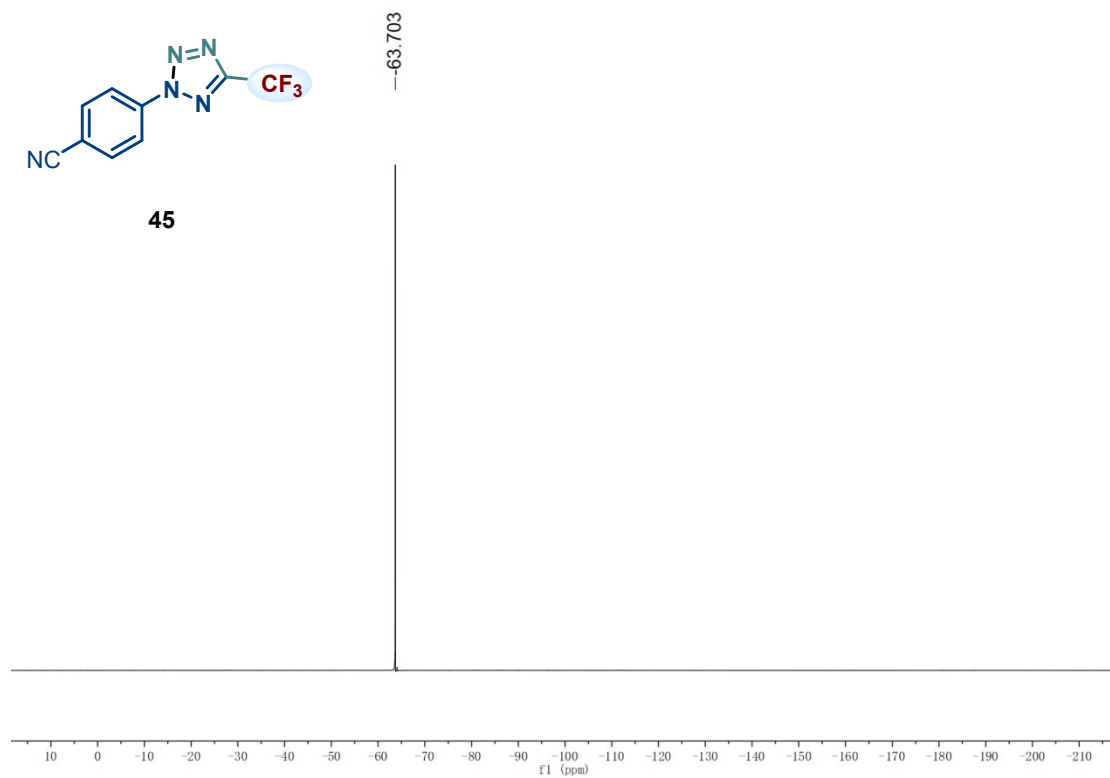

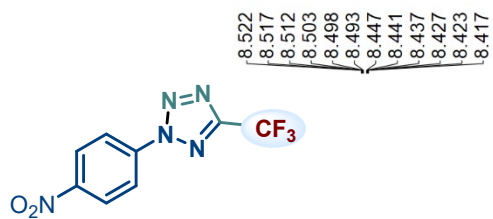

46

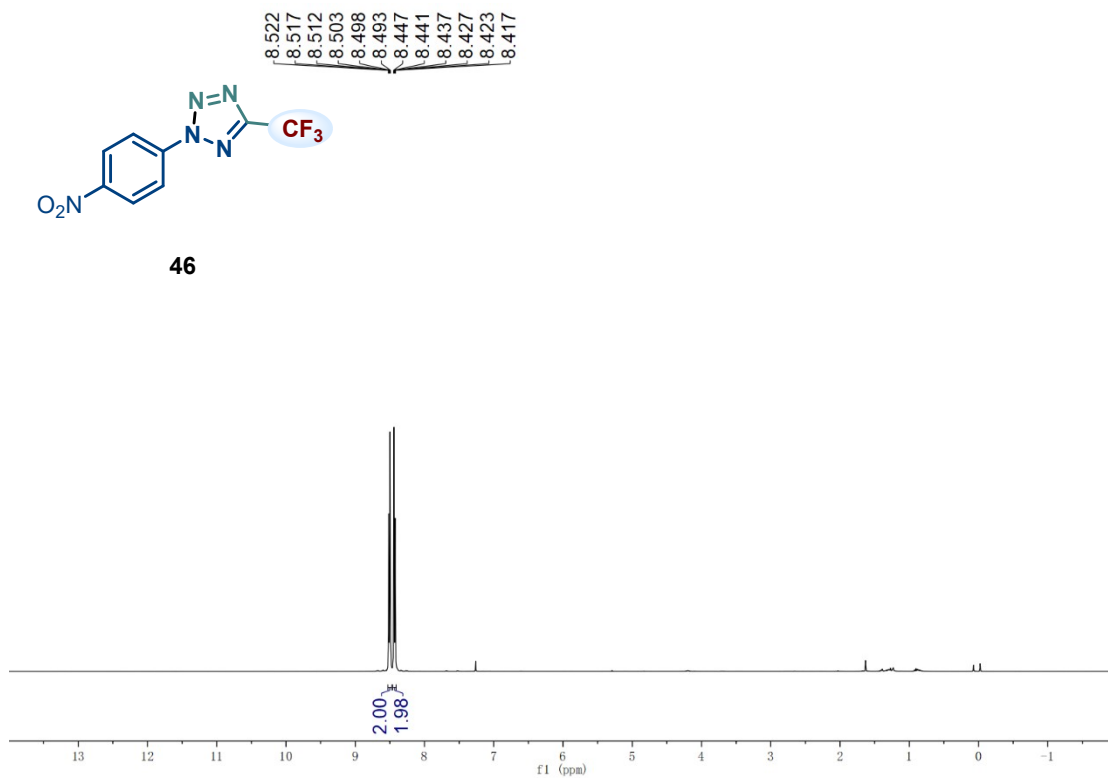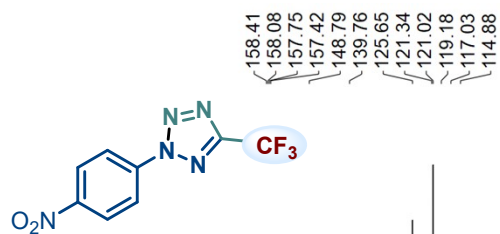

46

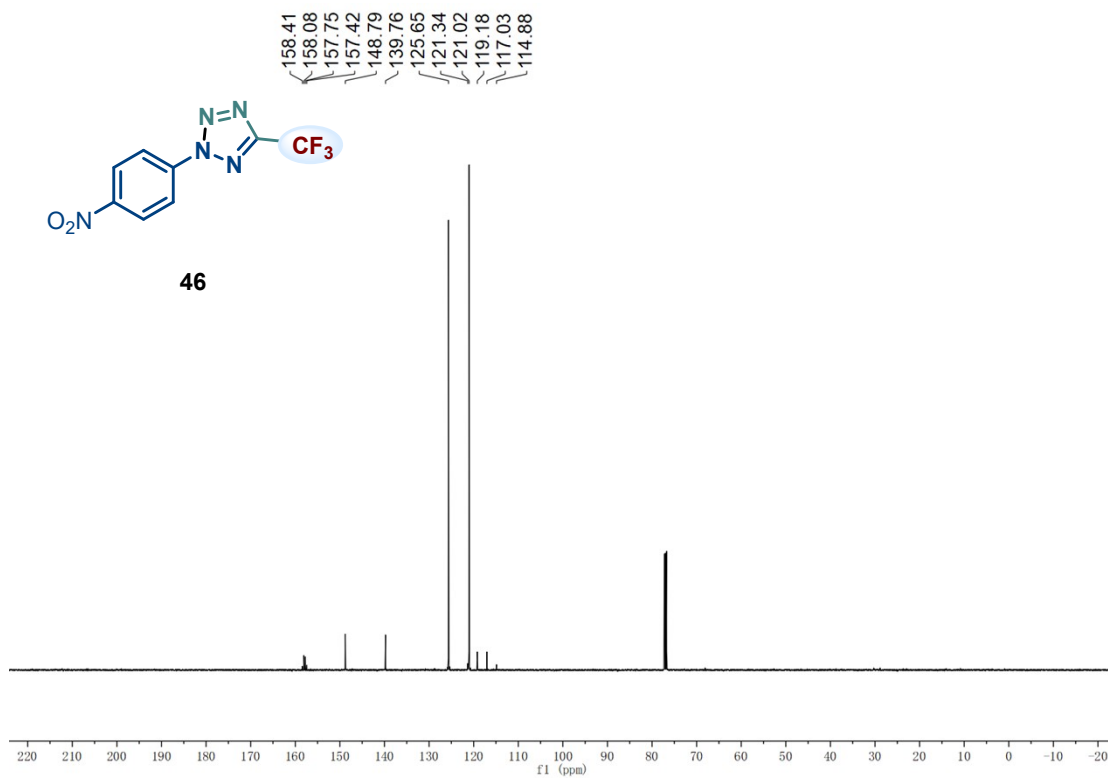

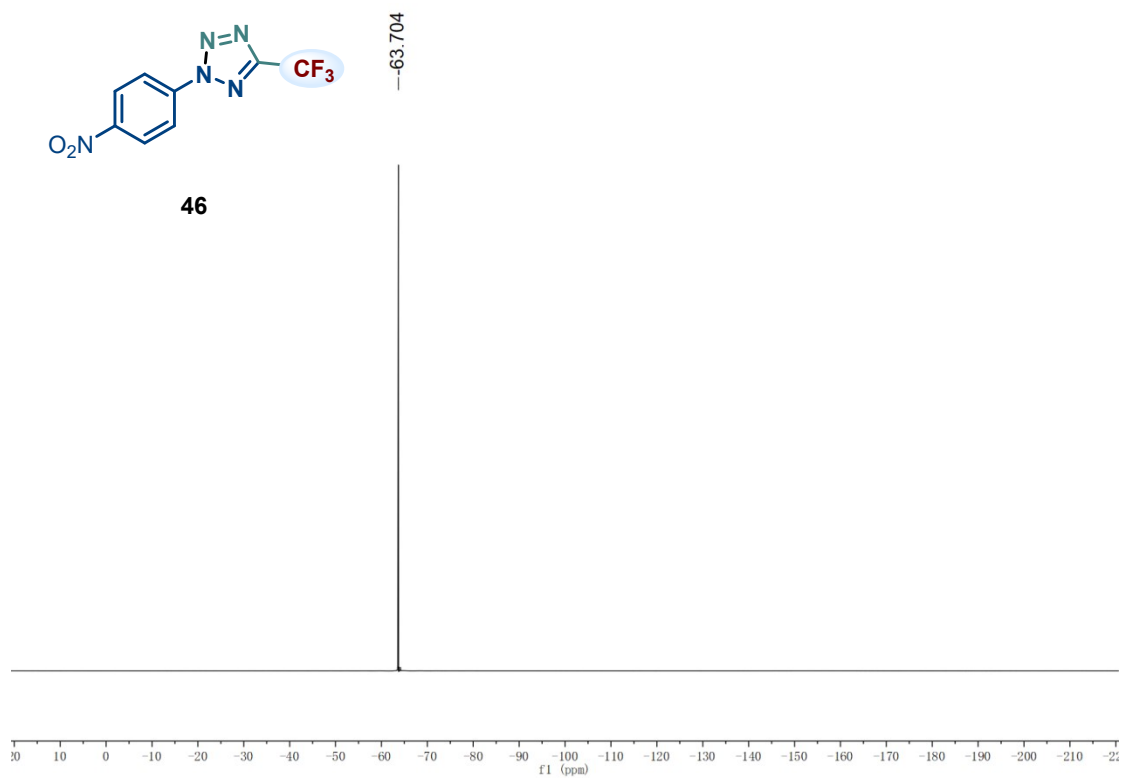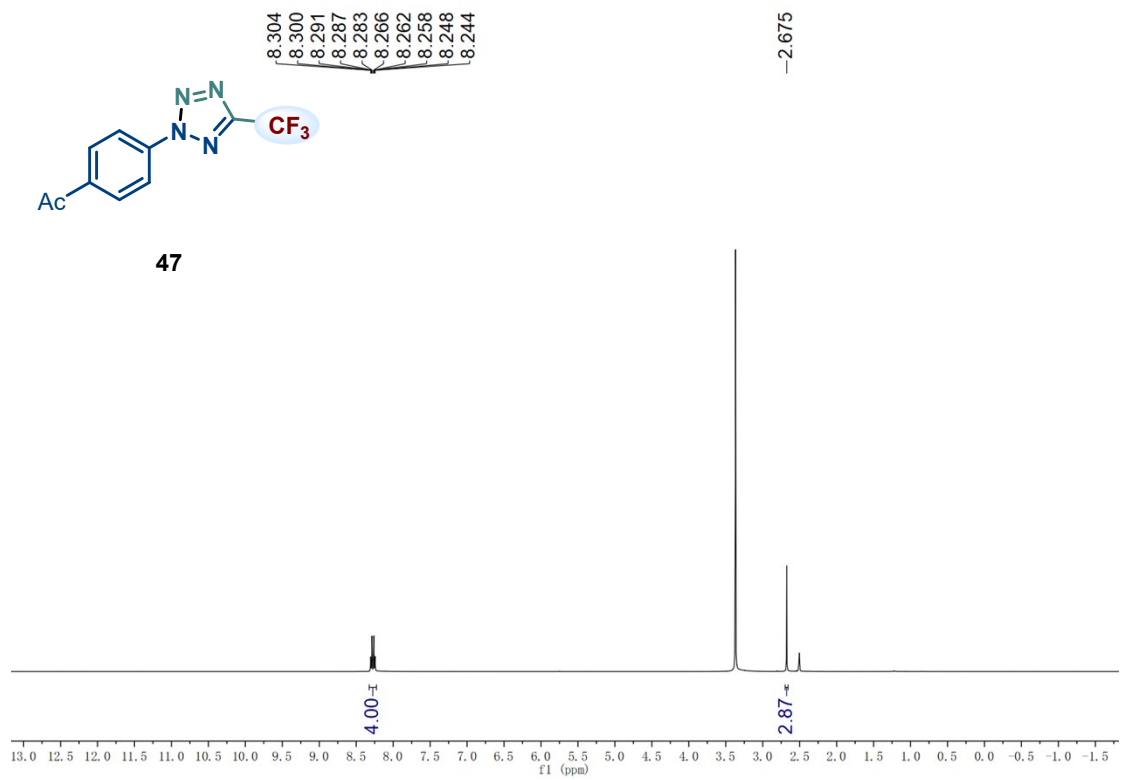

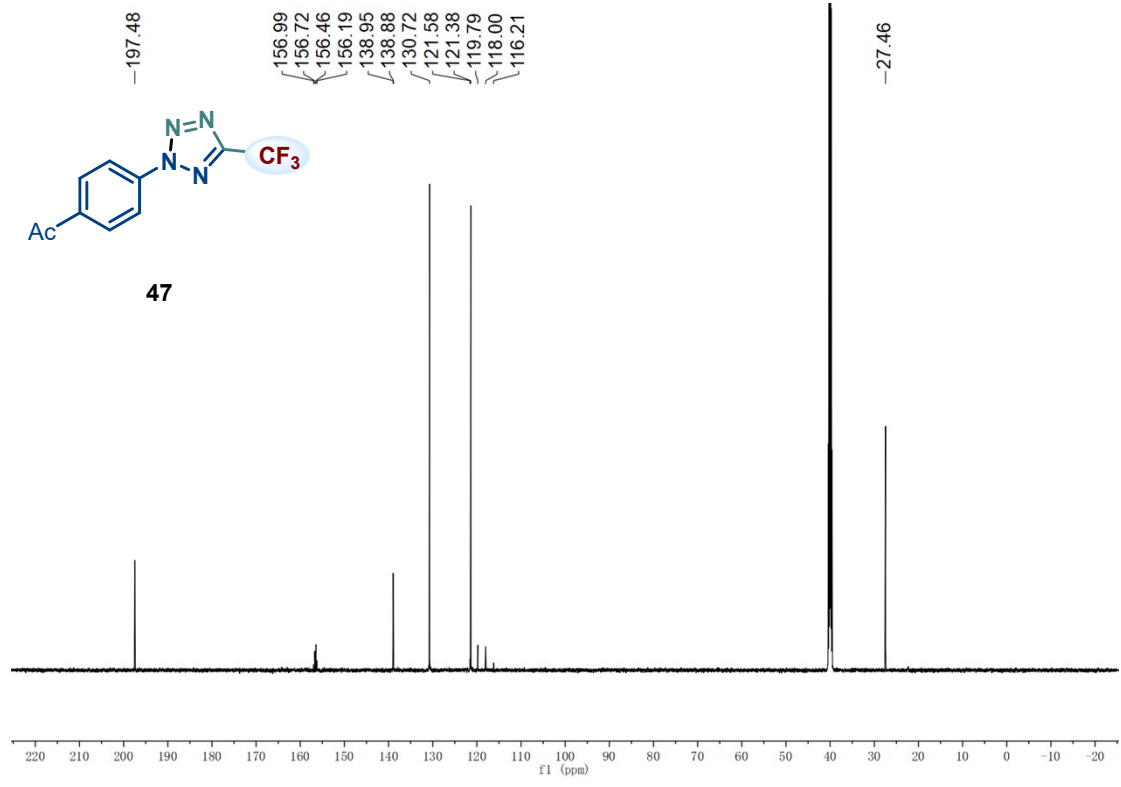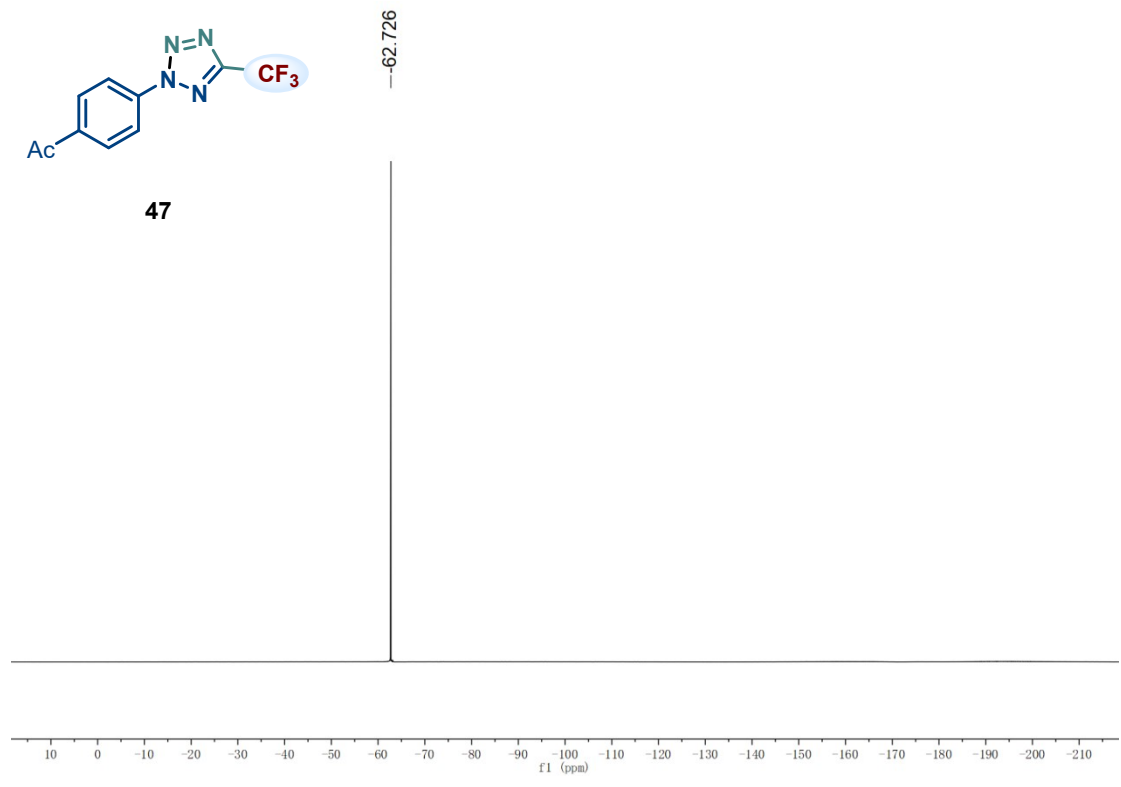

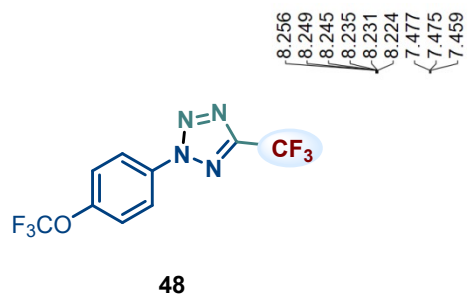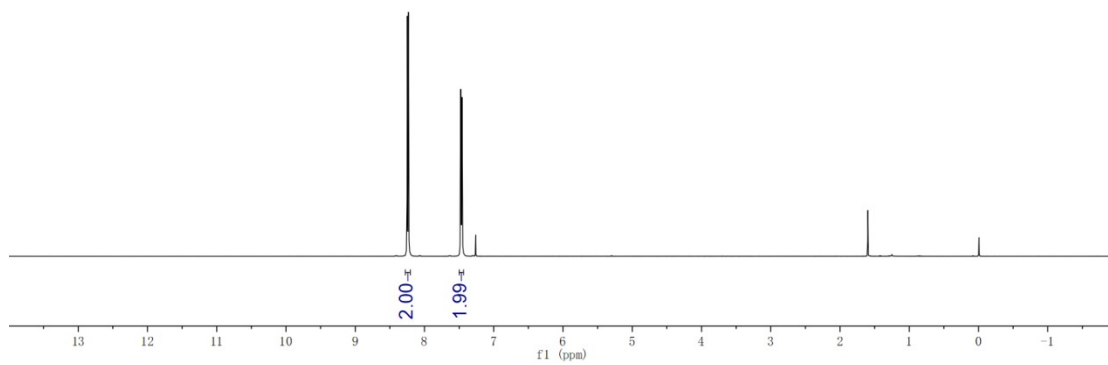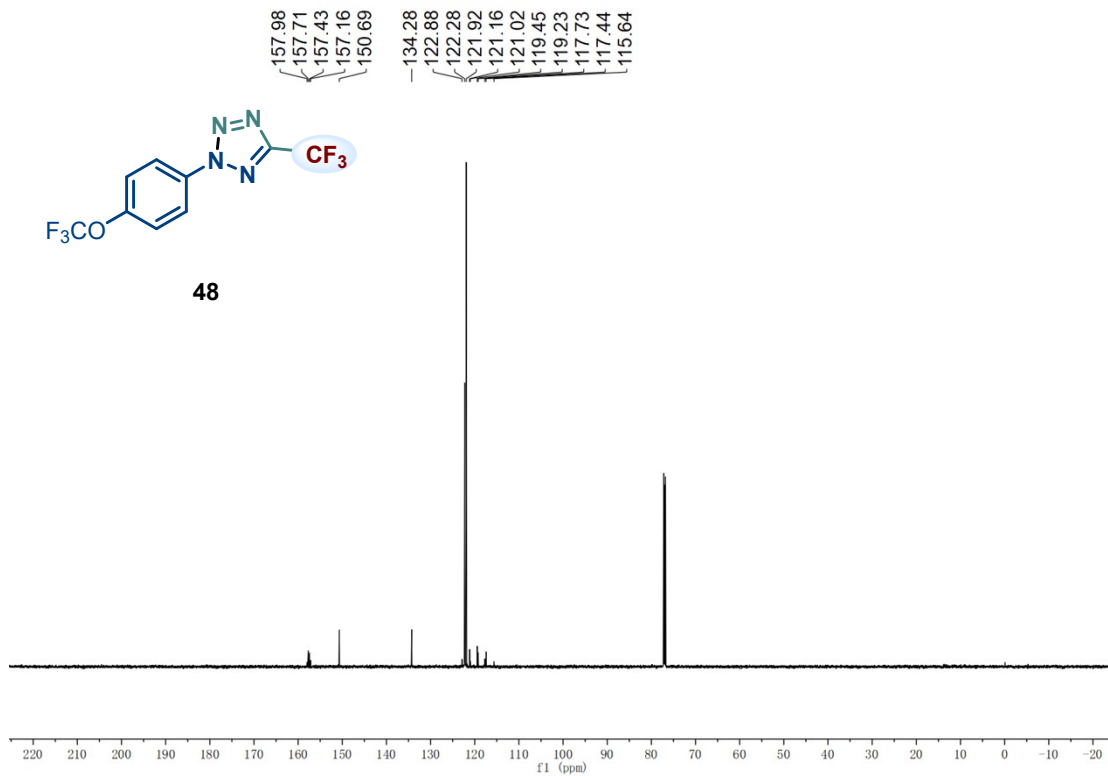

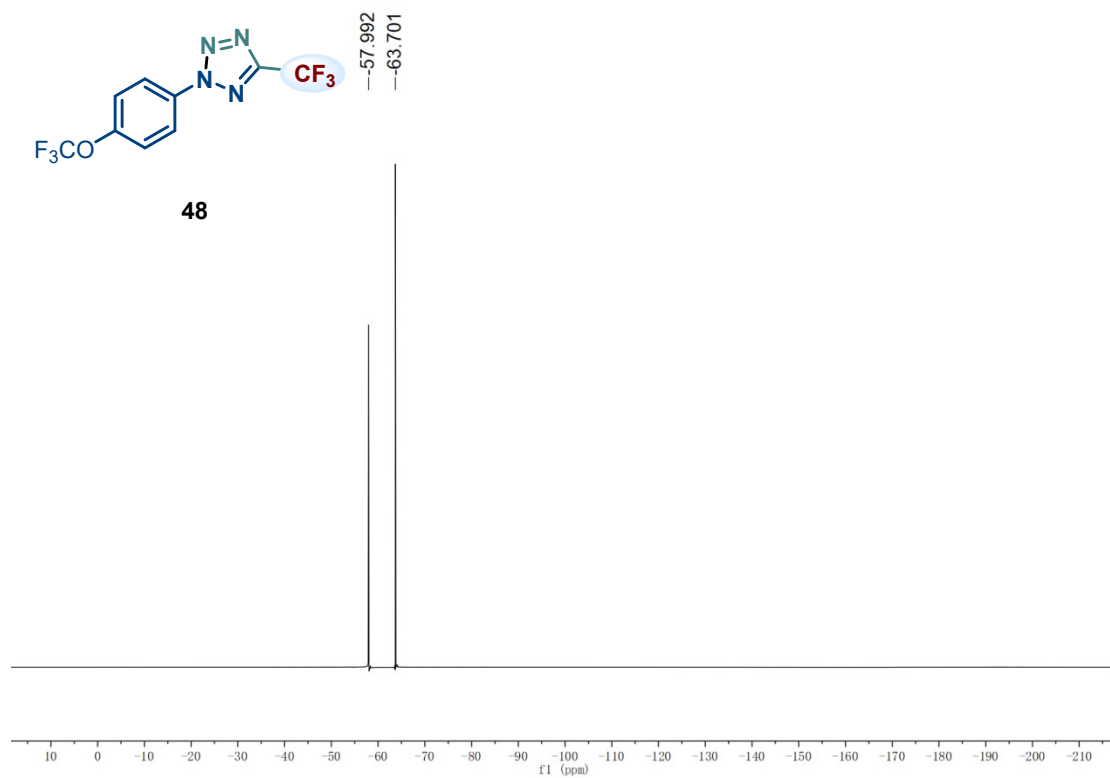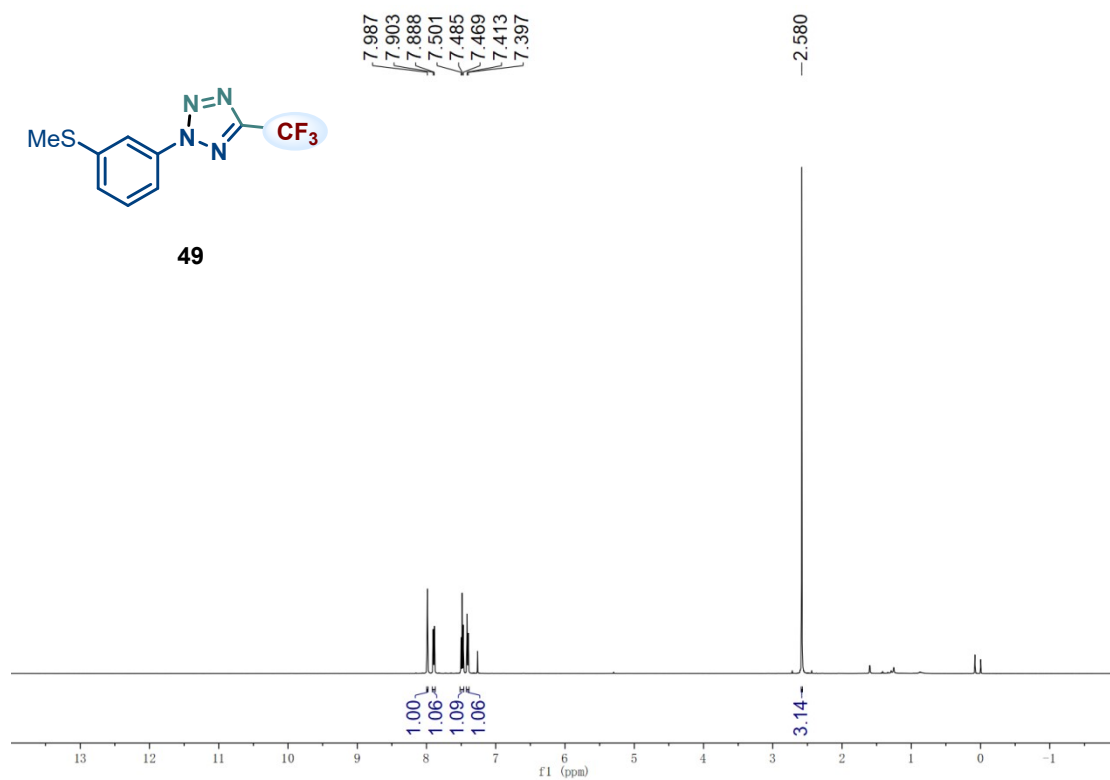

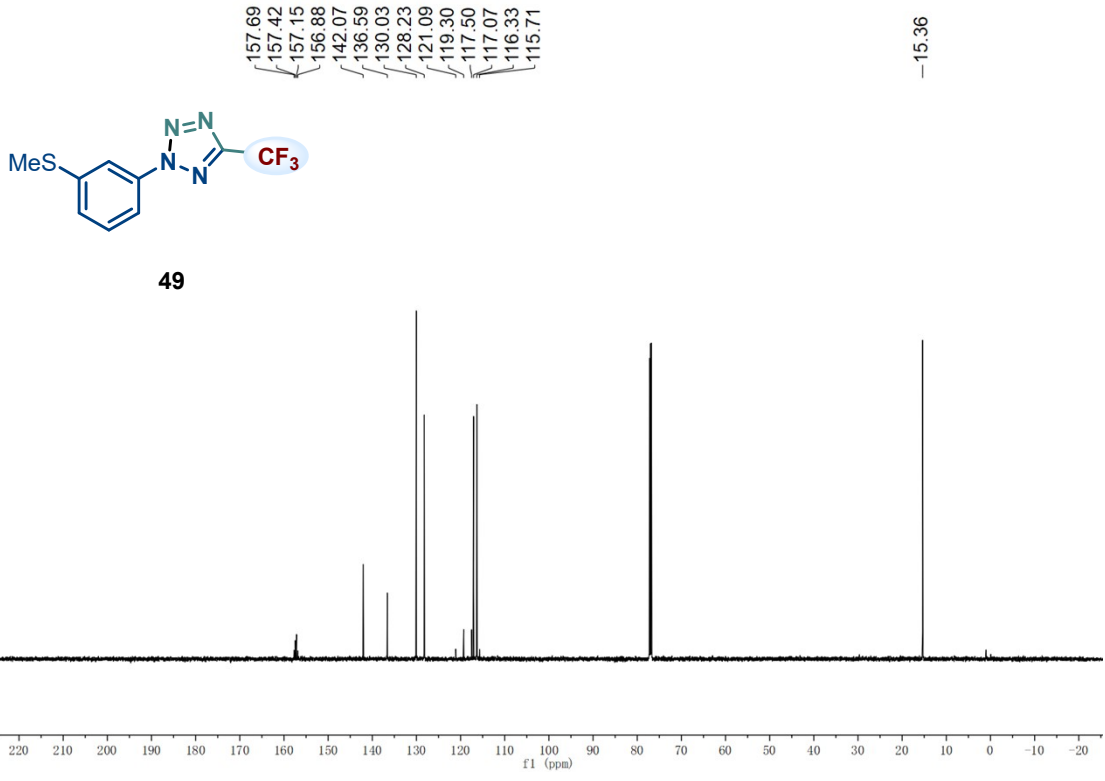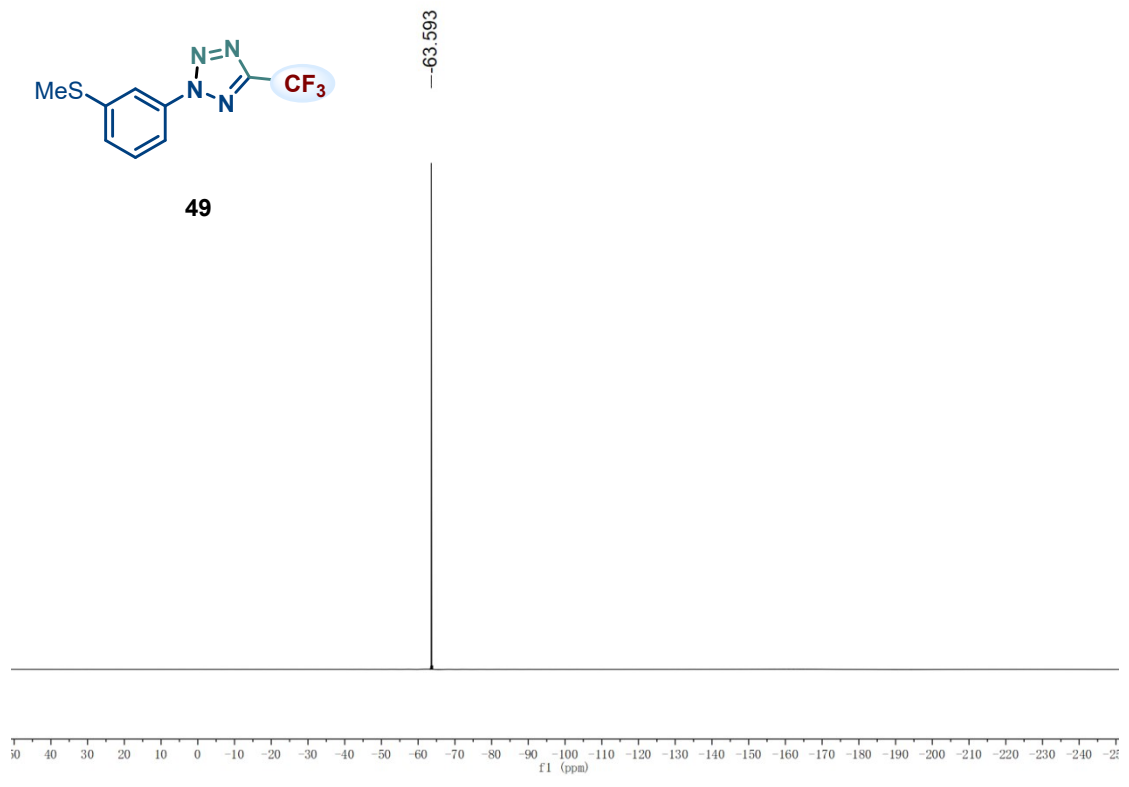

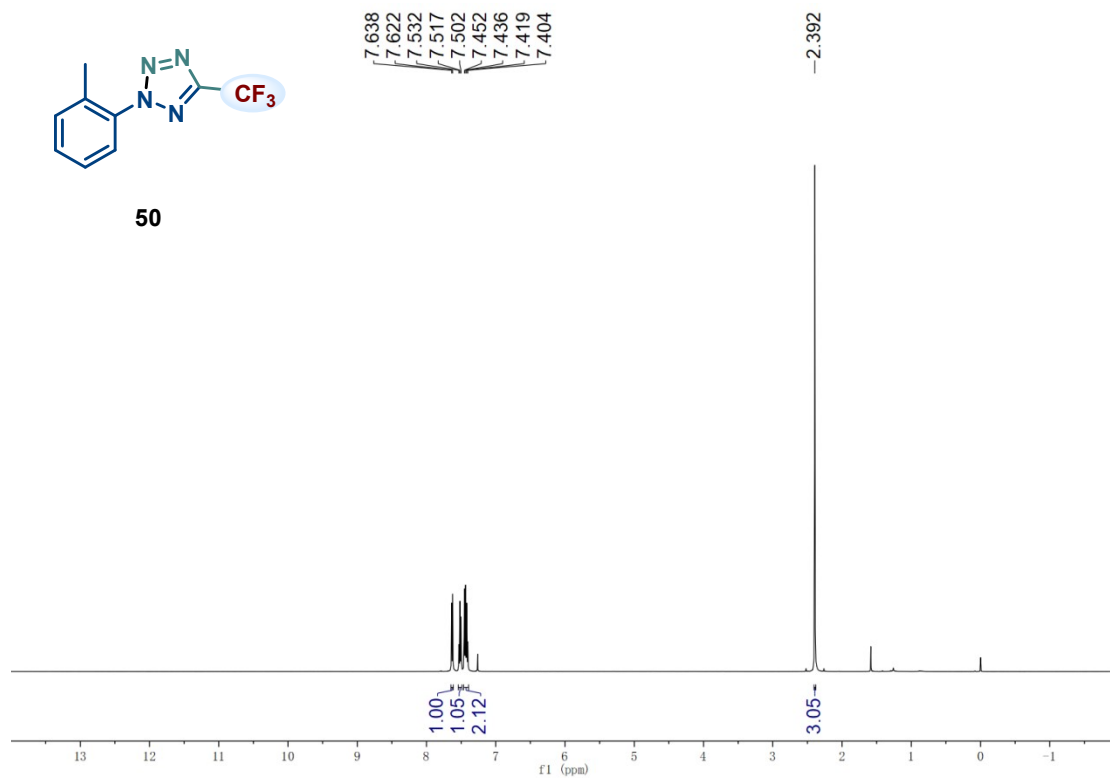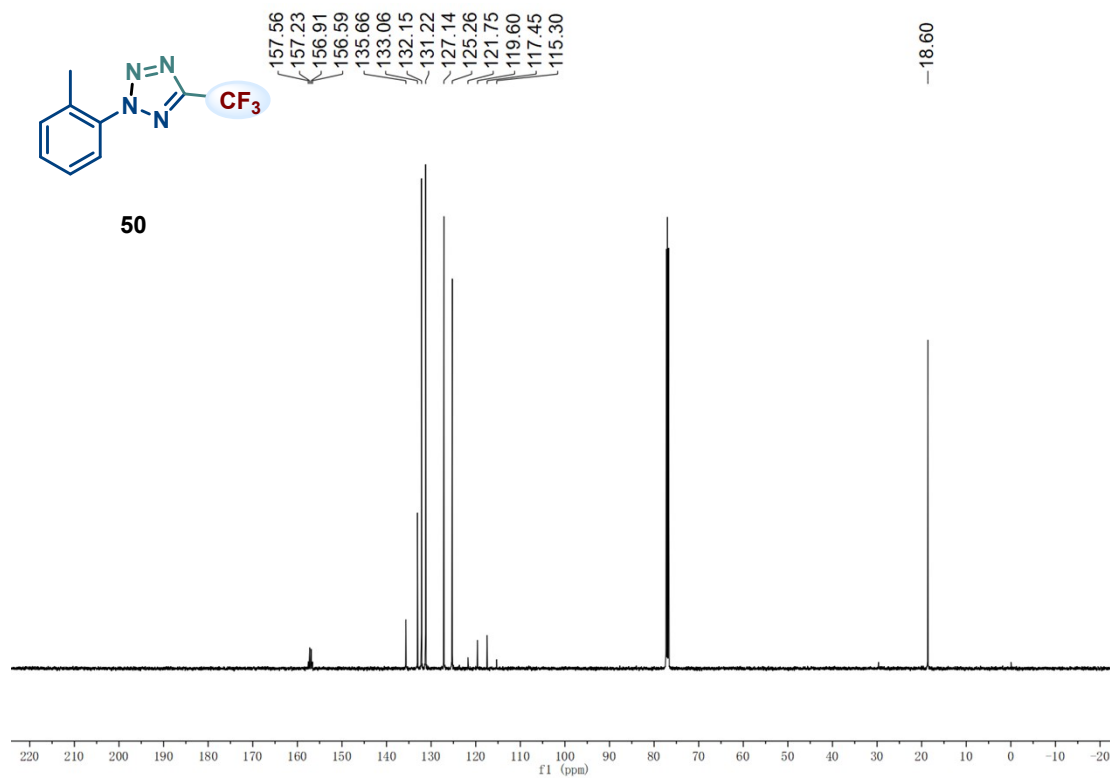



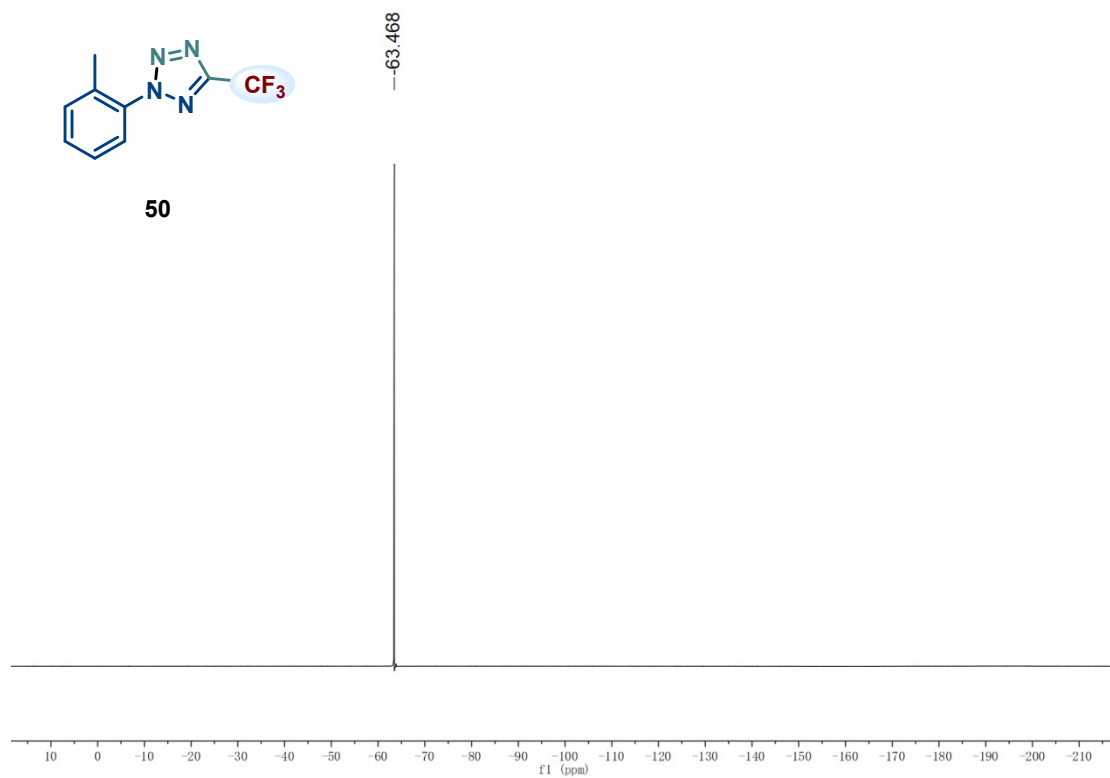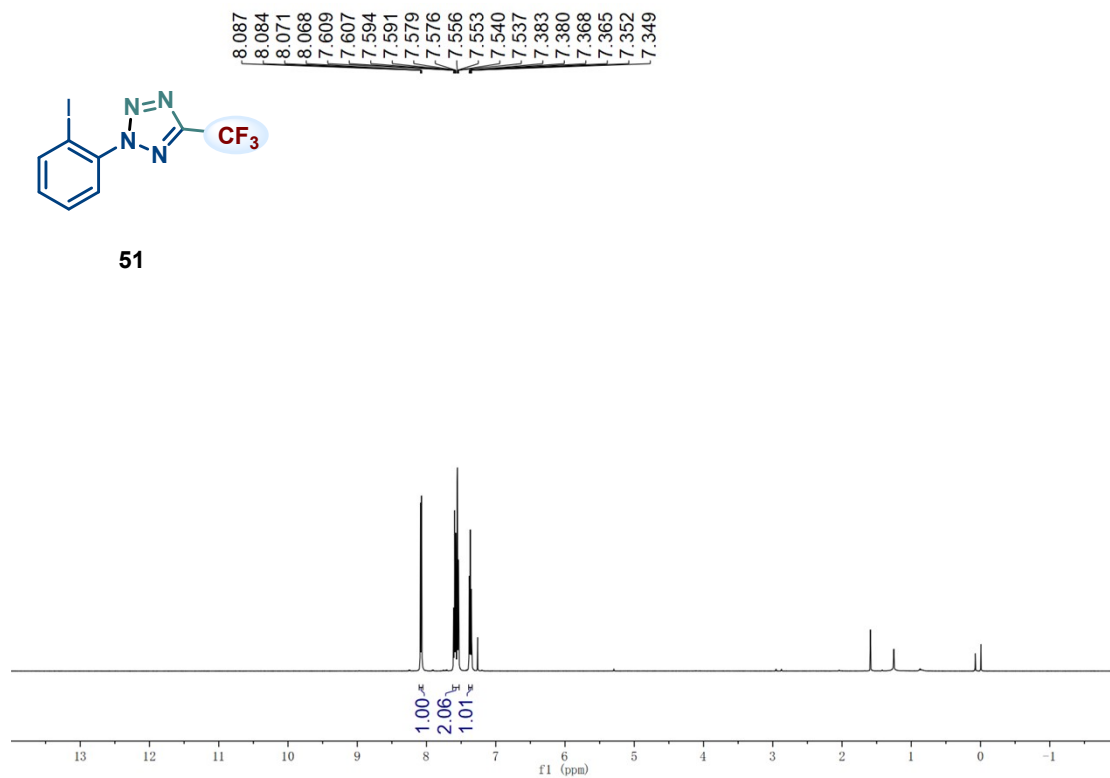

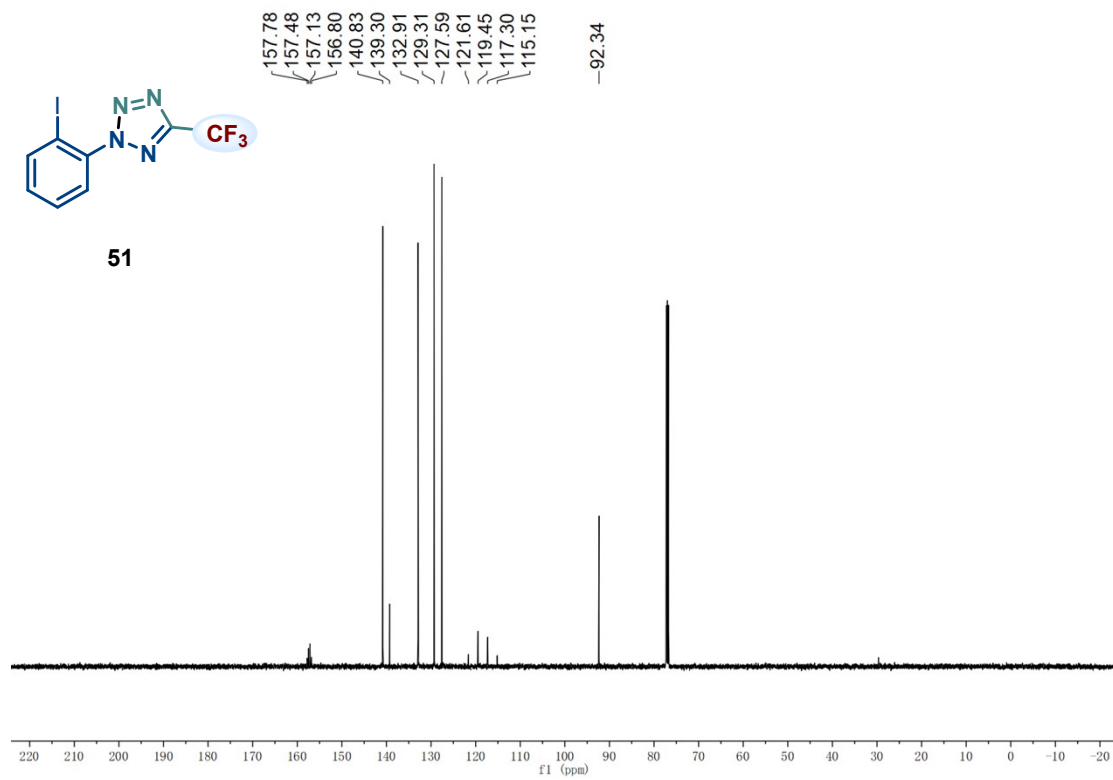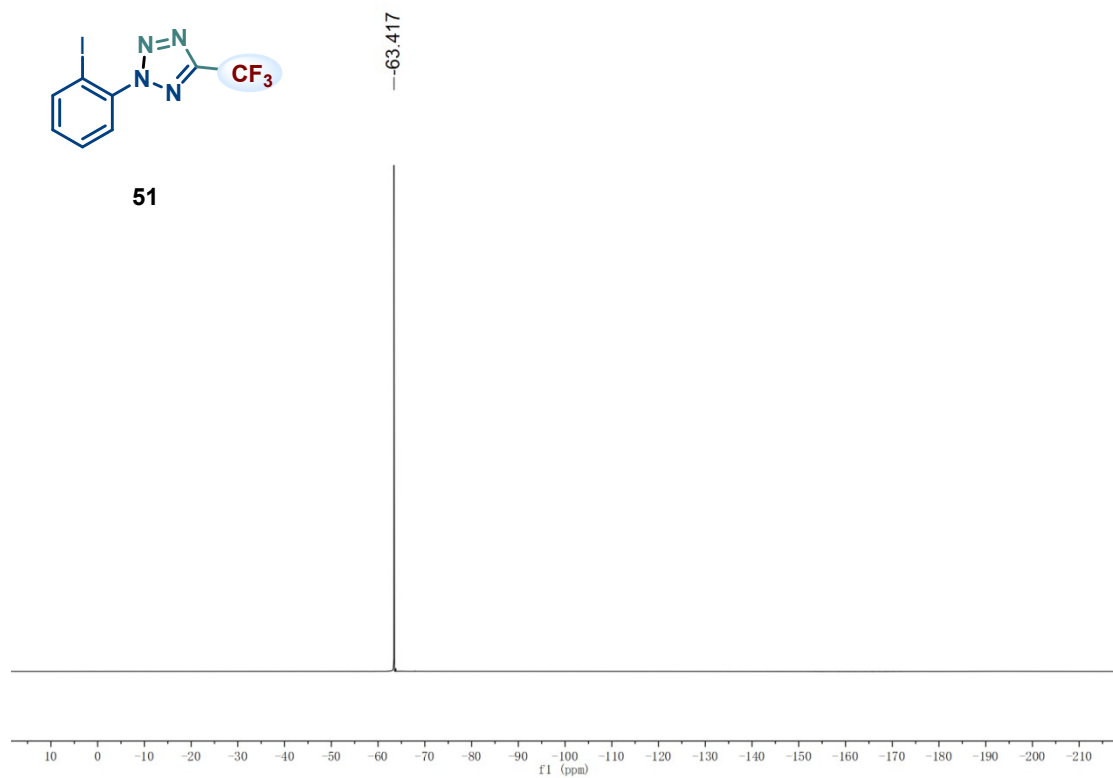

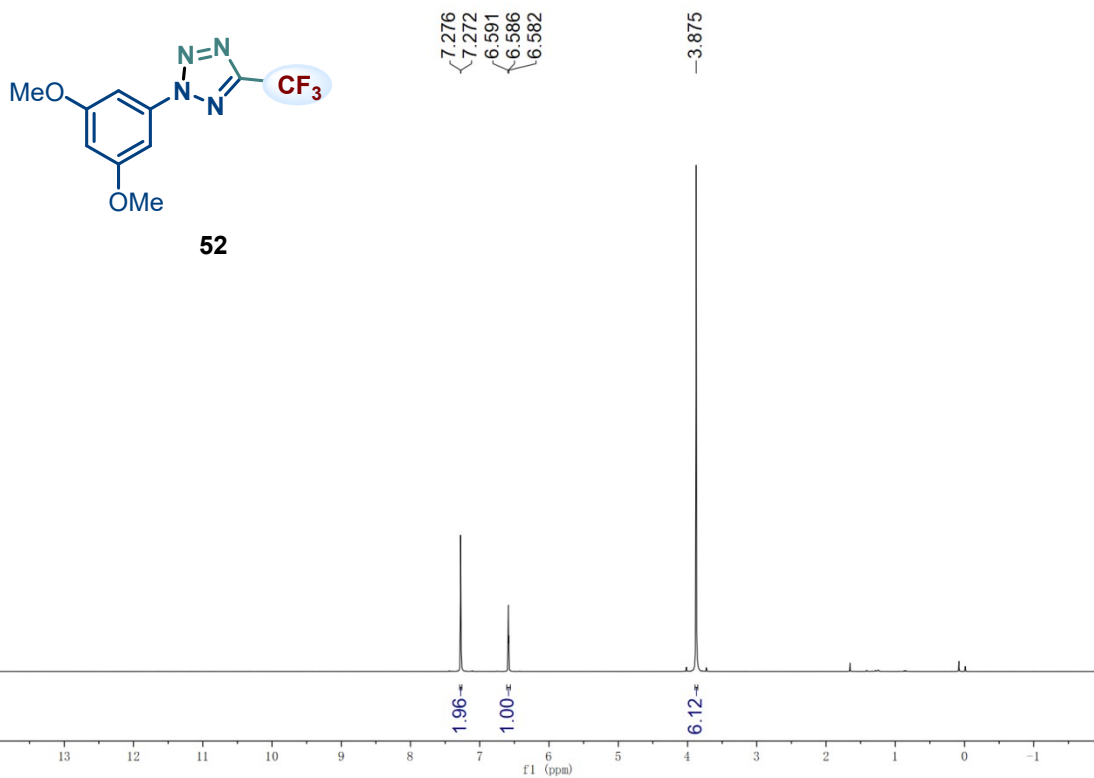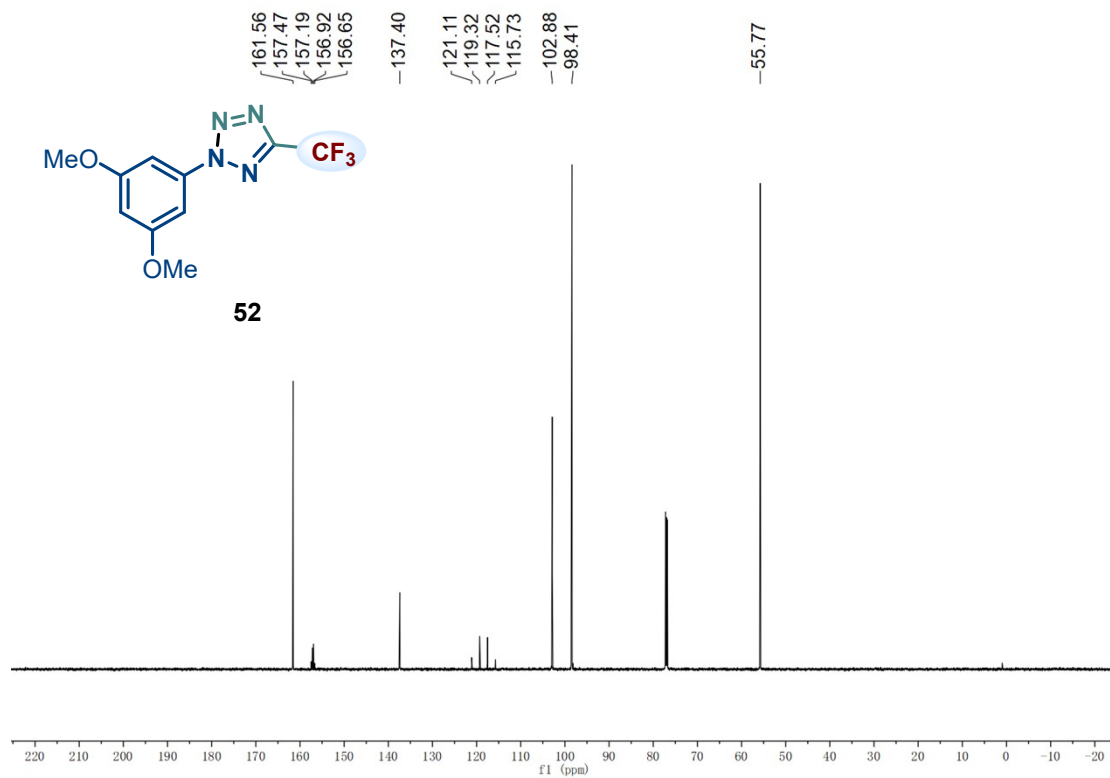

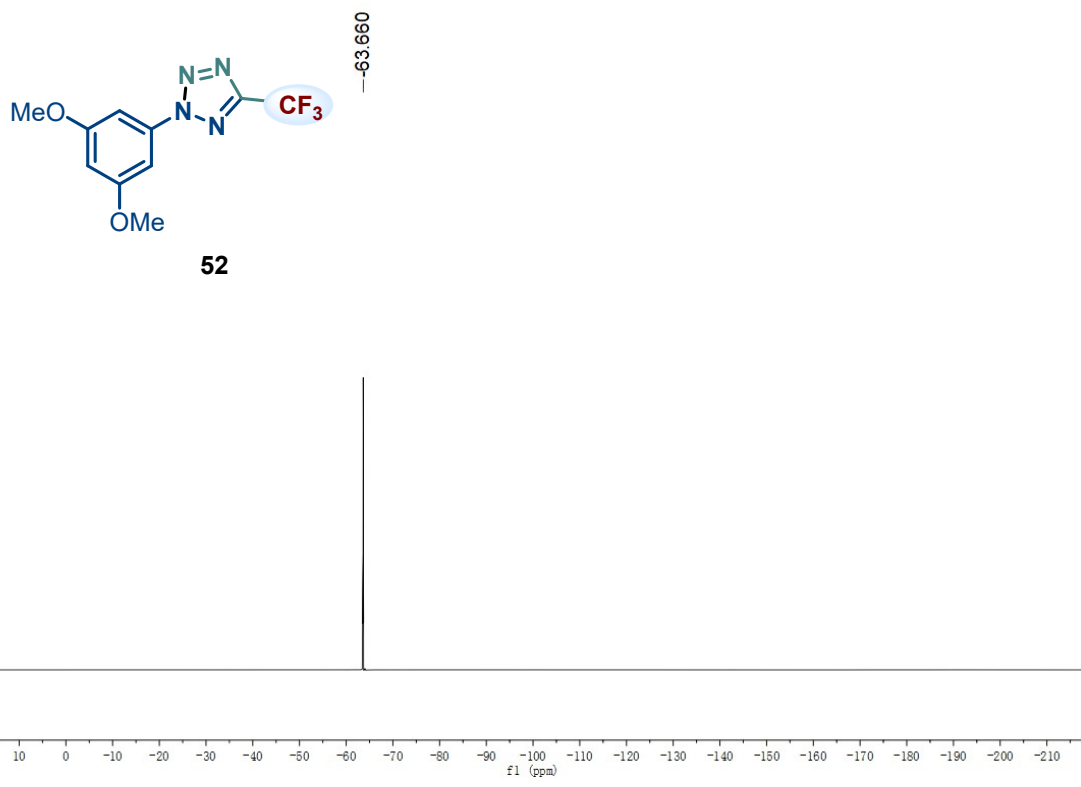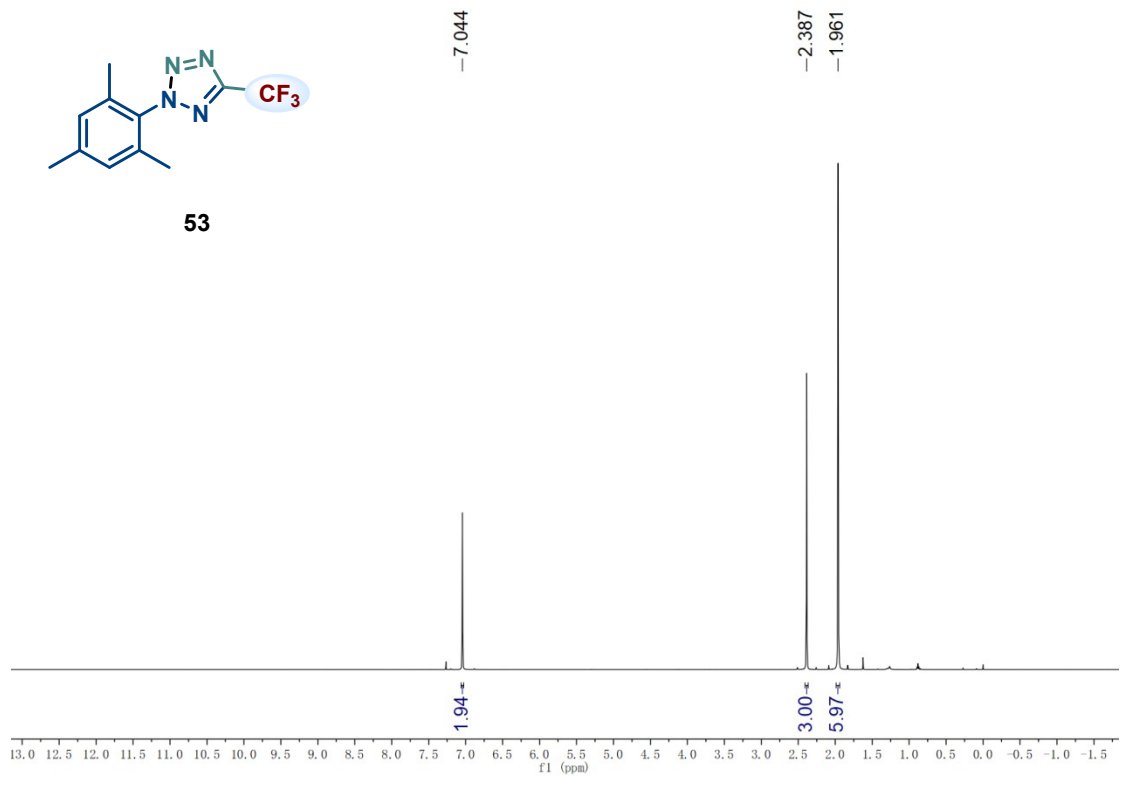

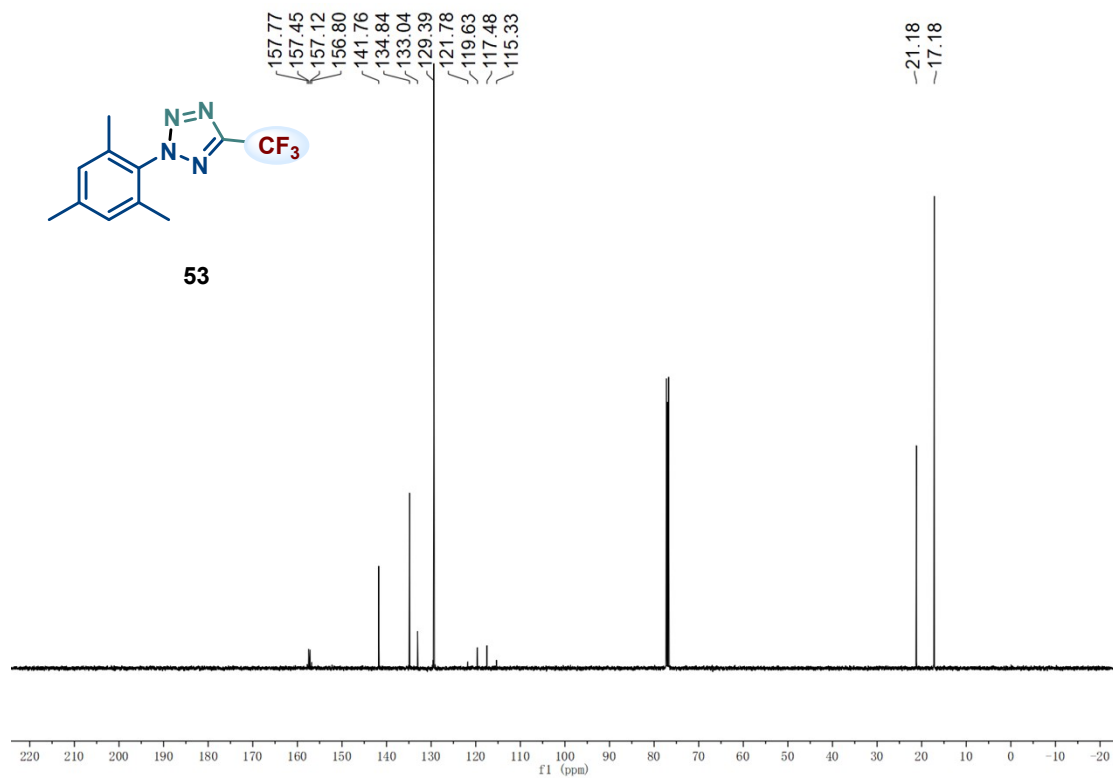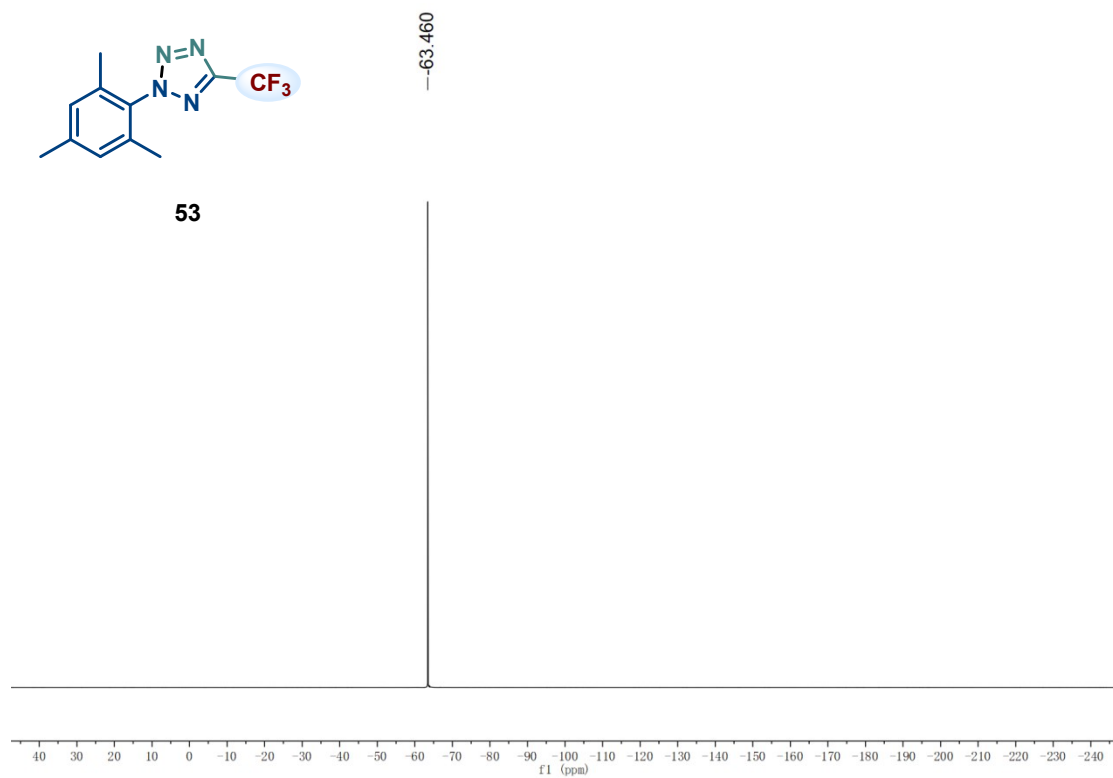

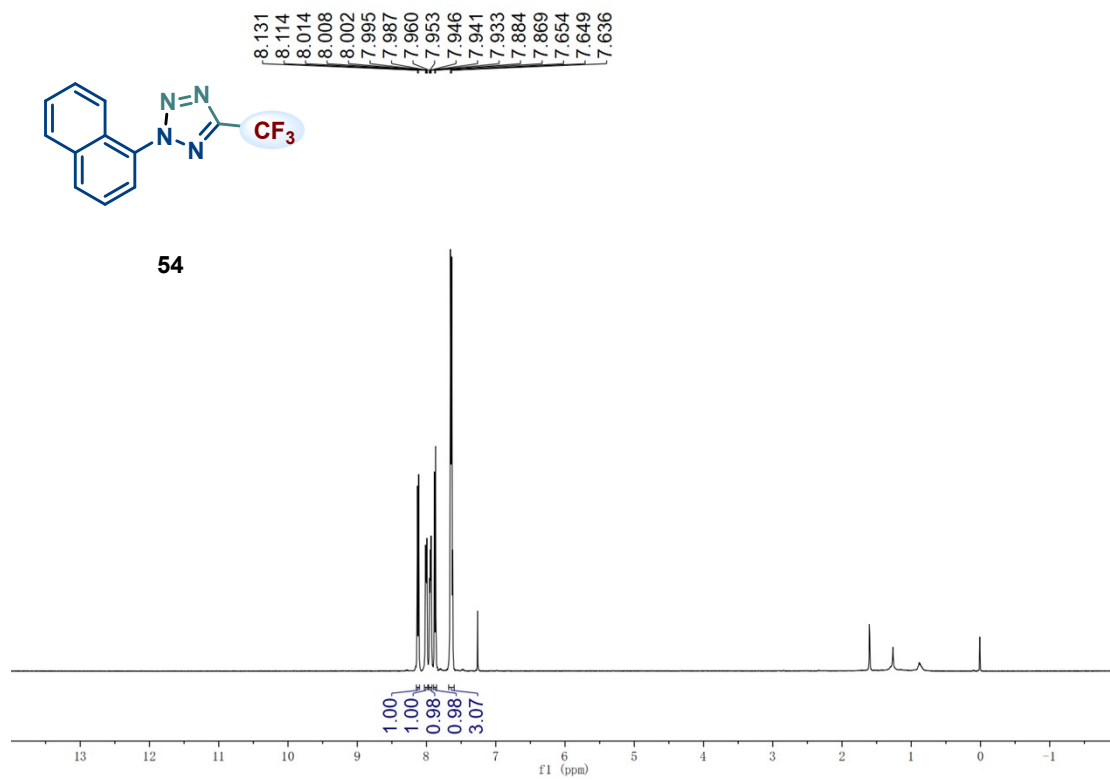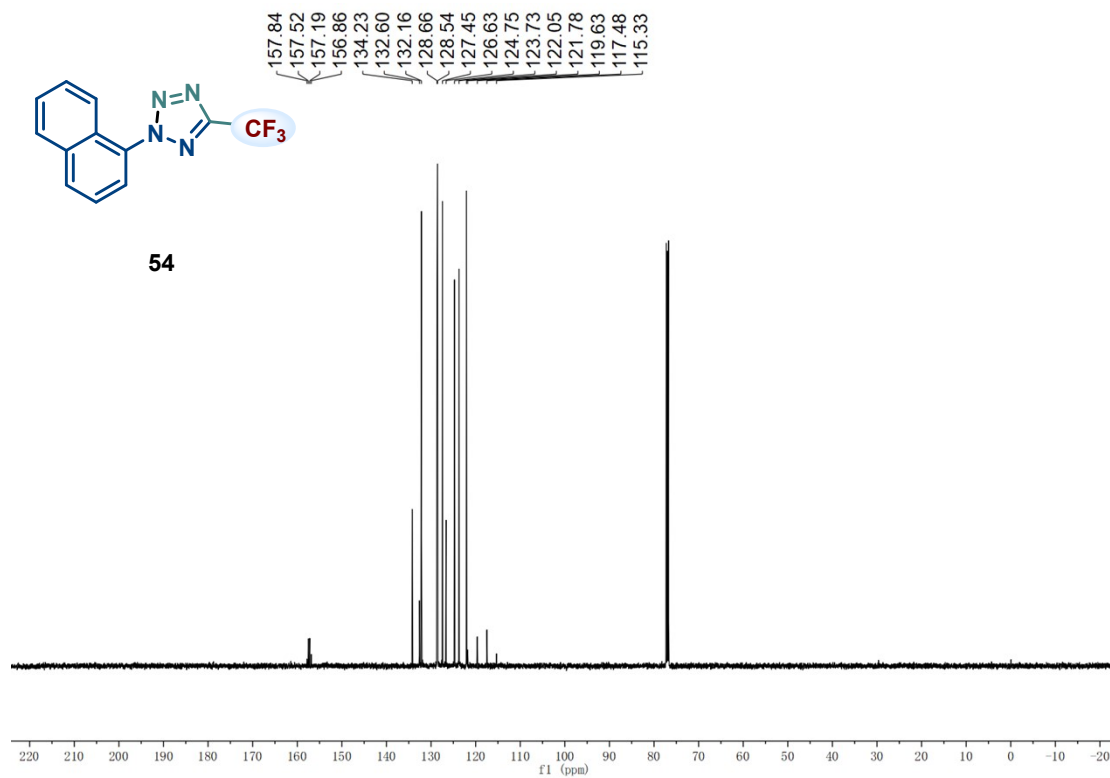

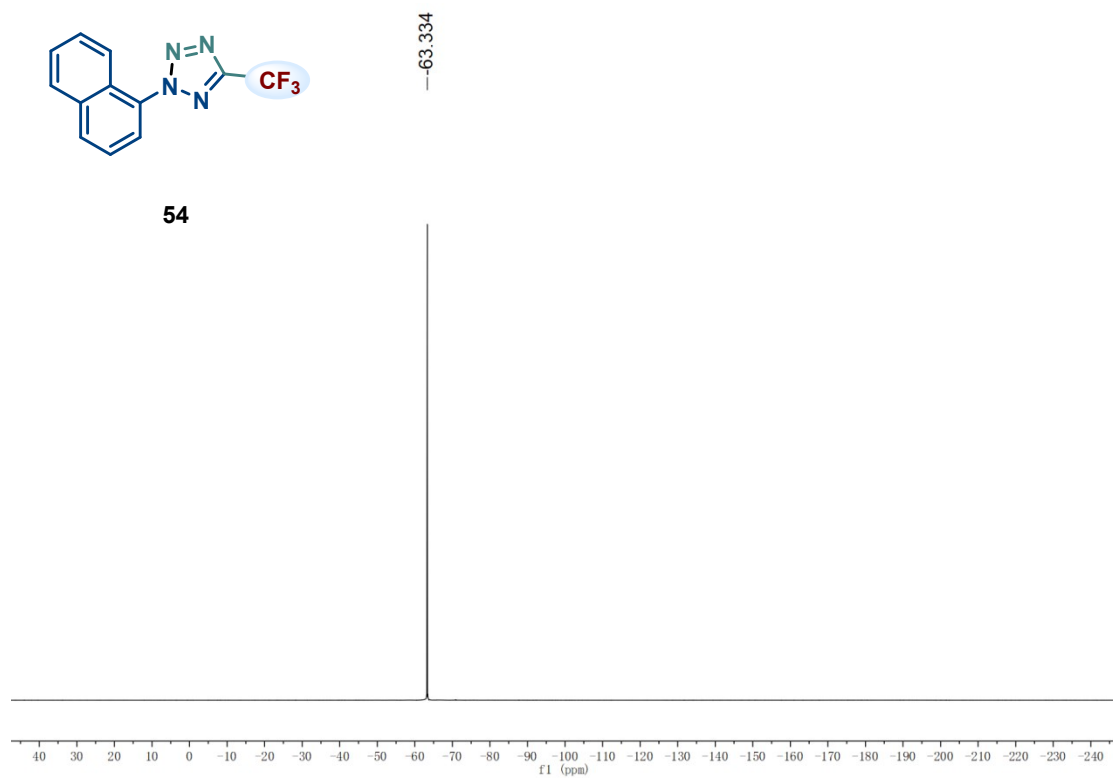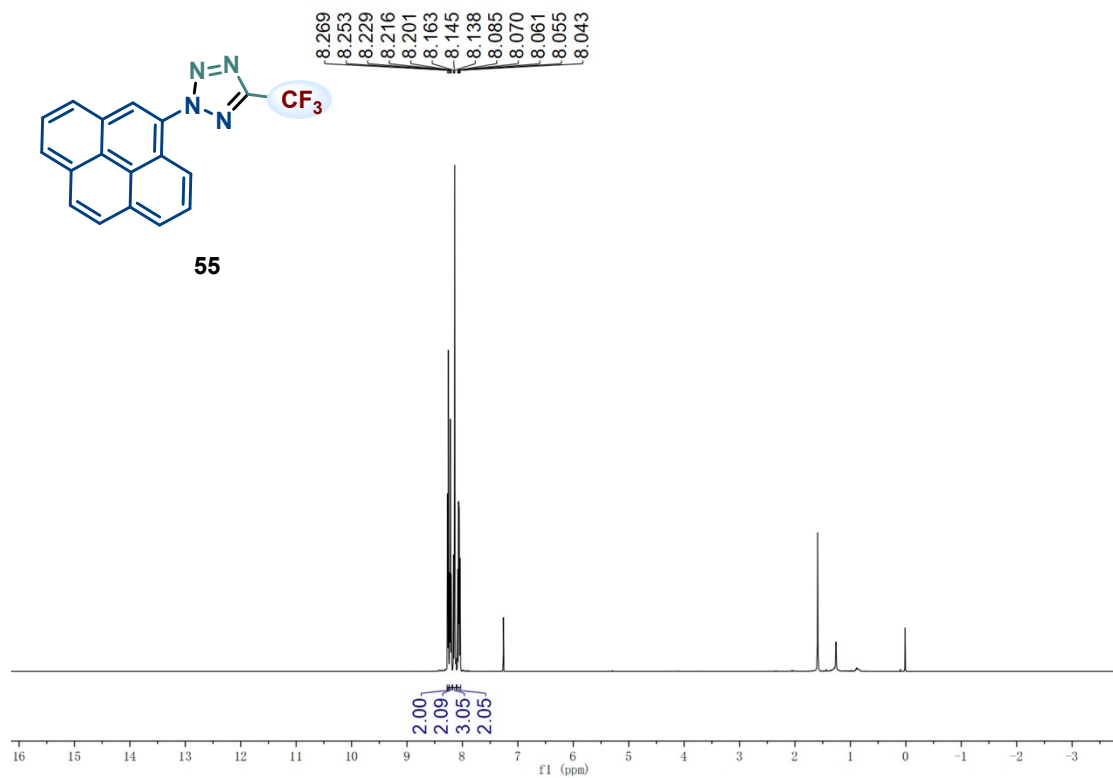

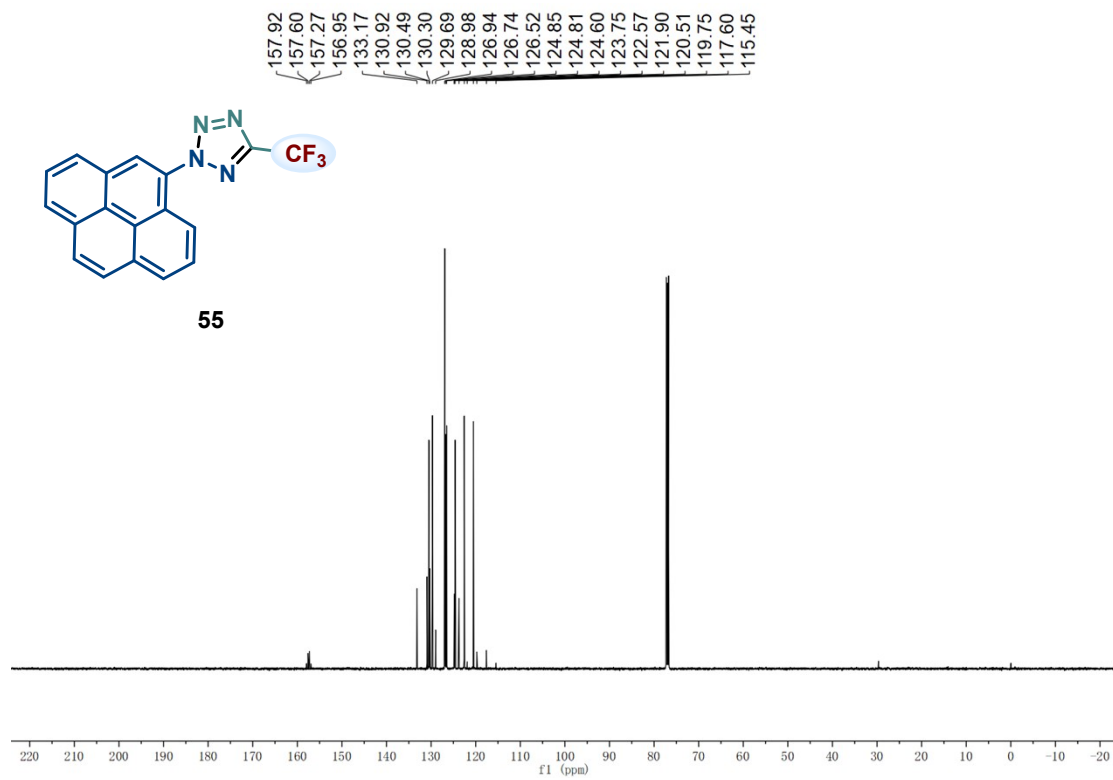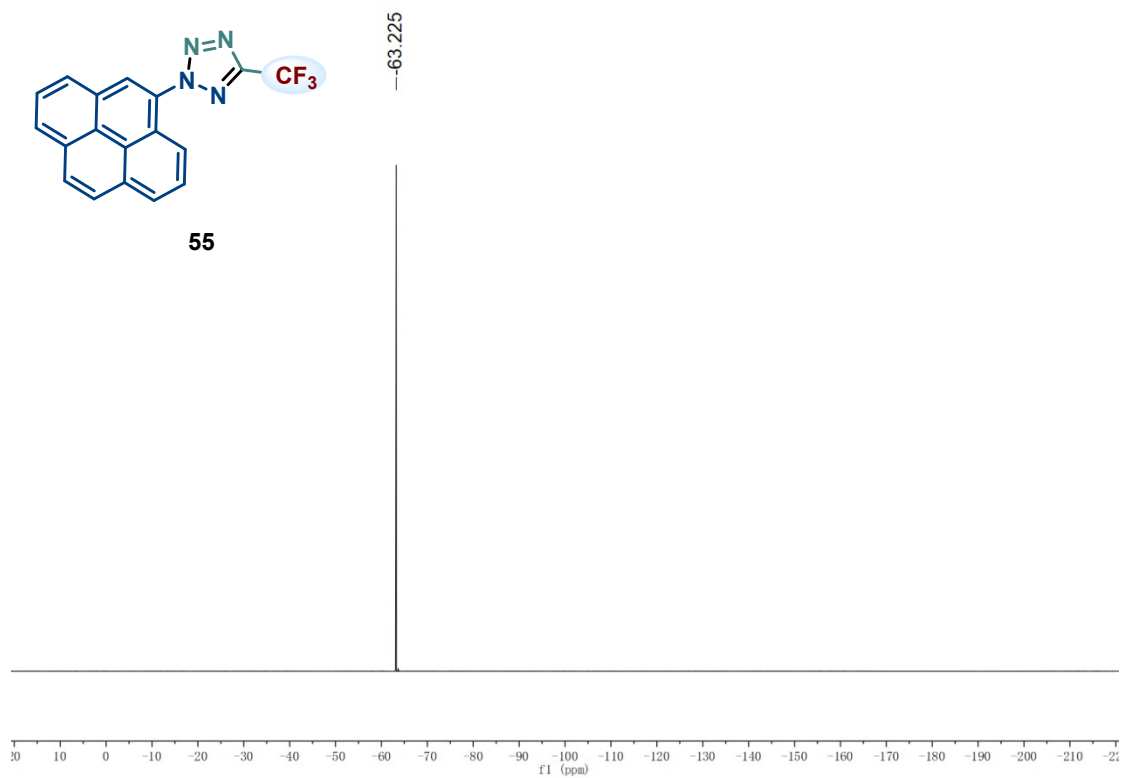



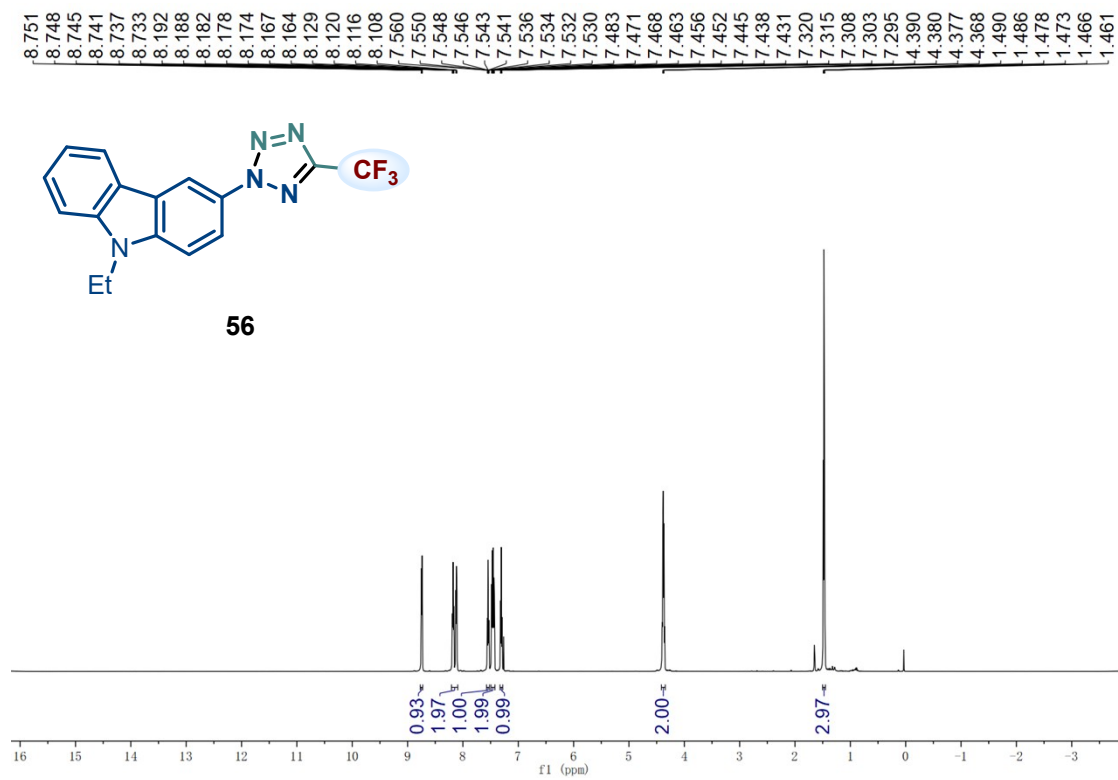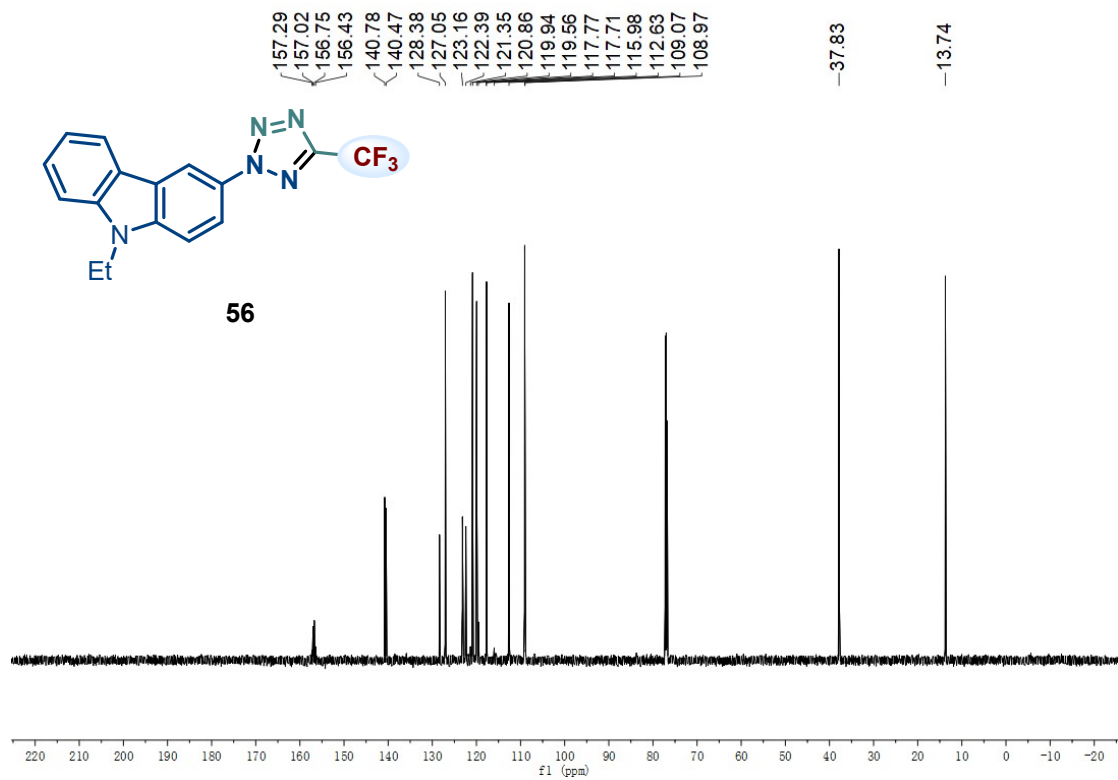

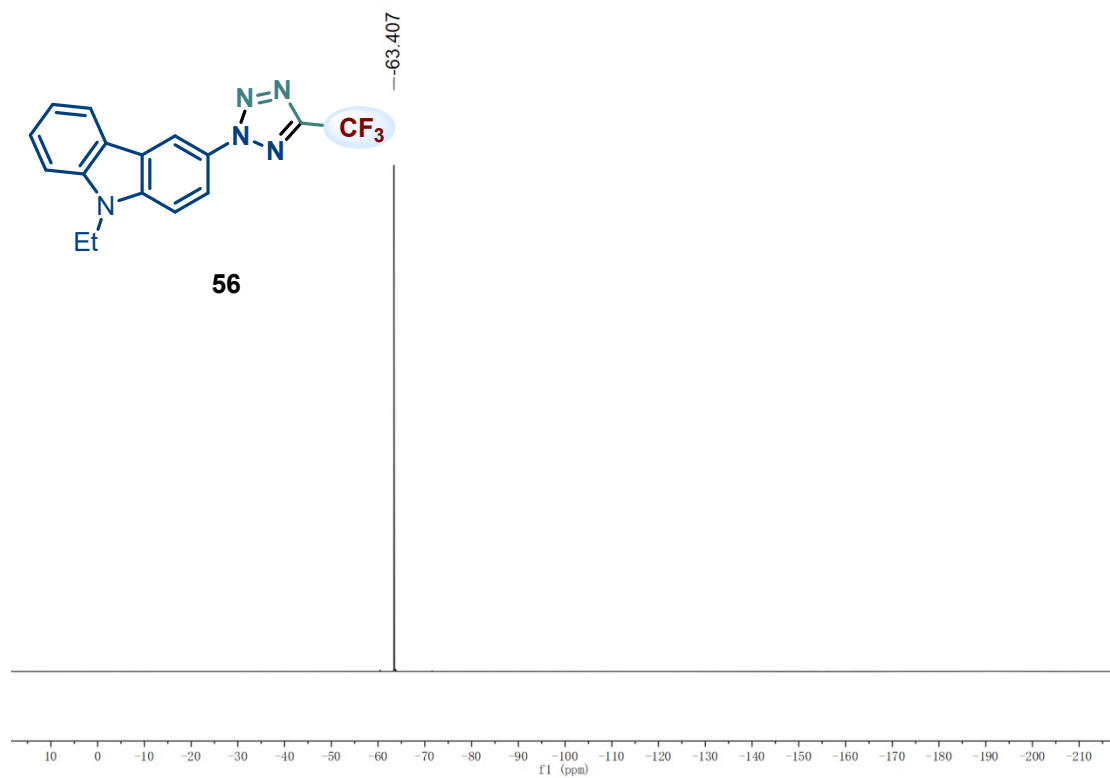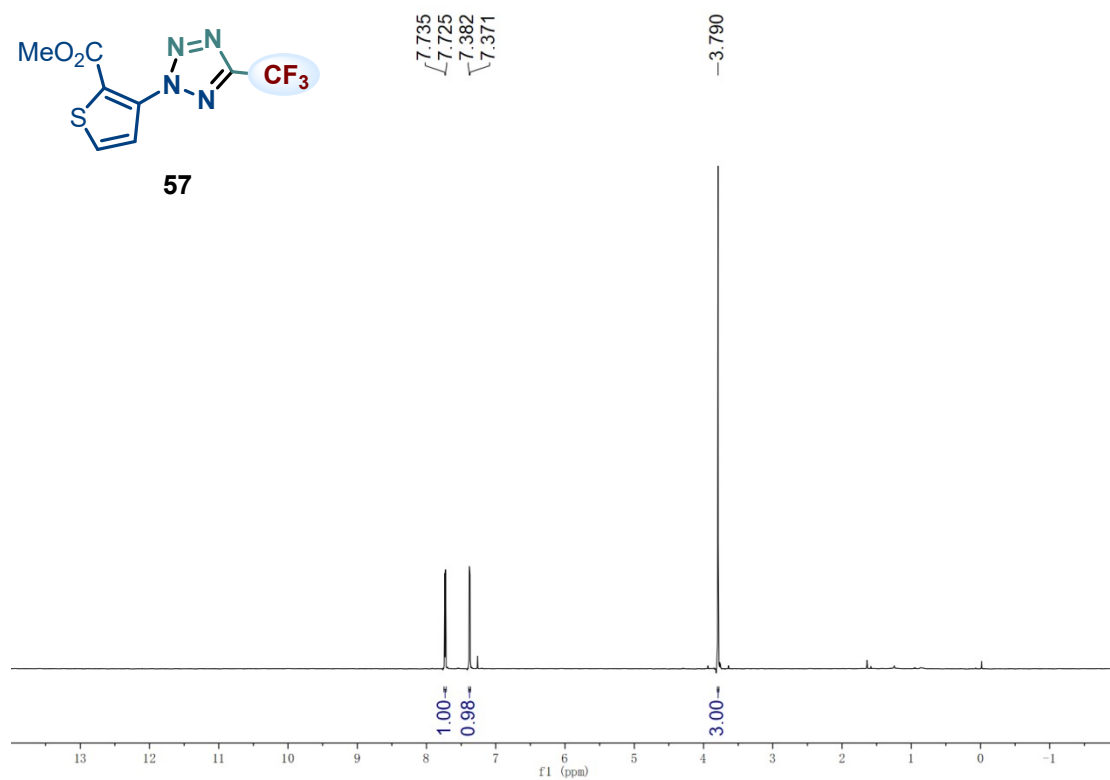

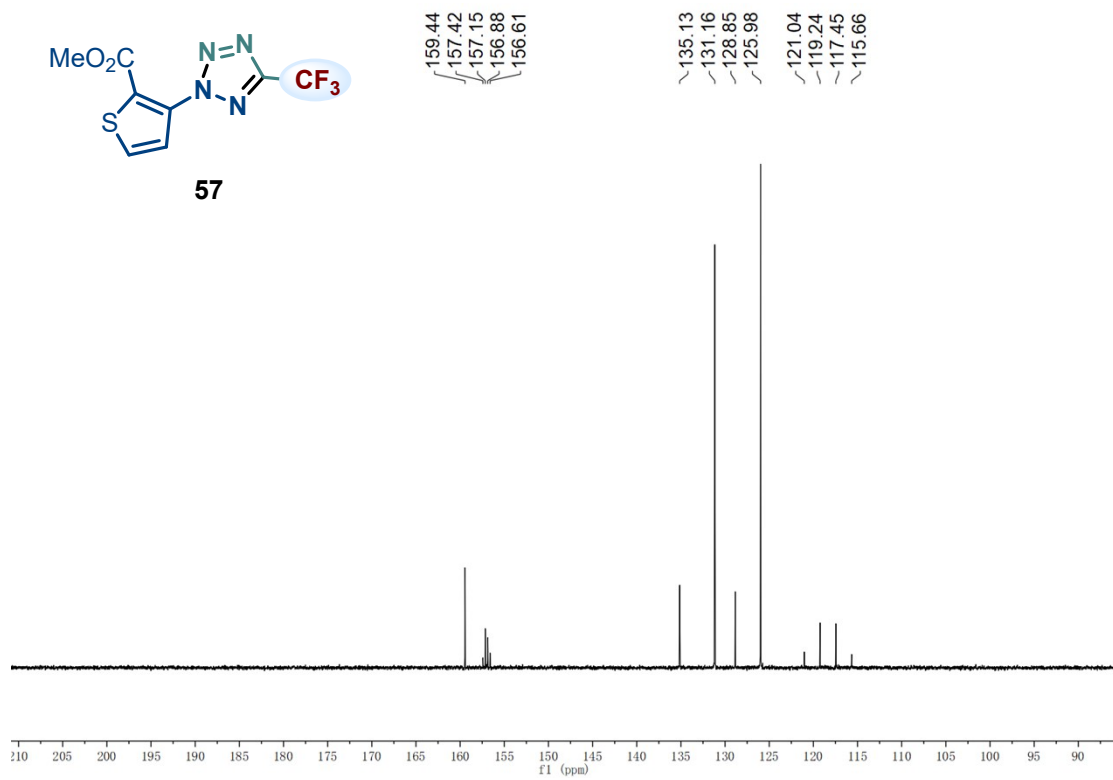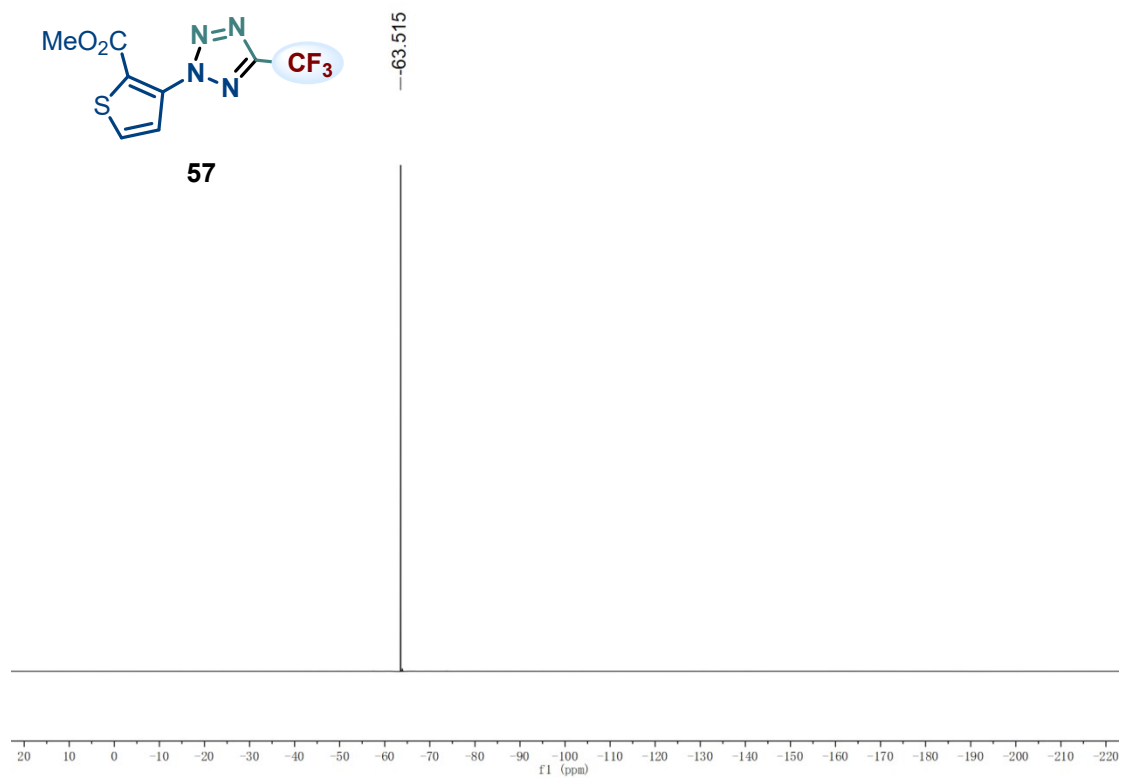

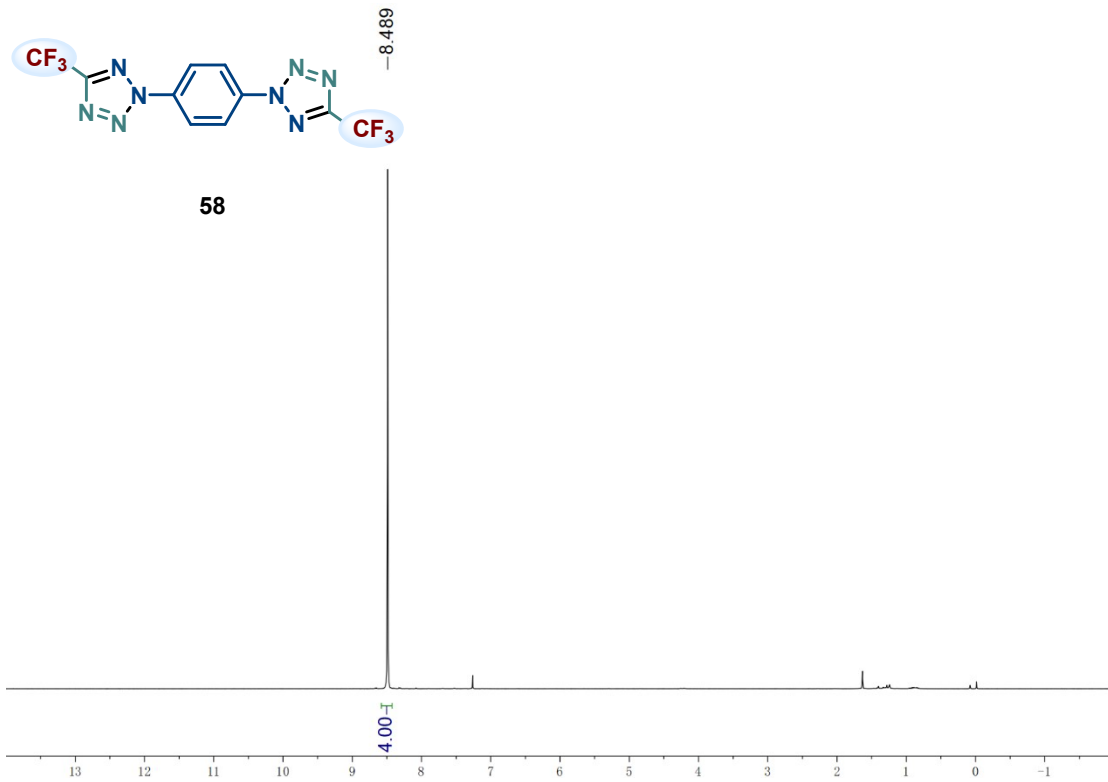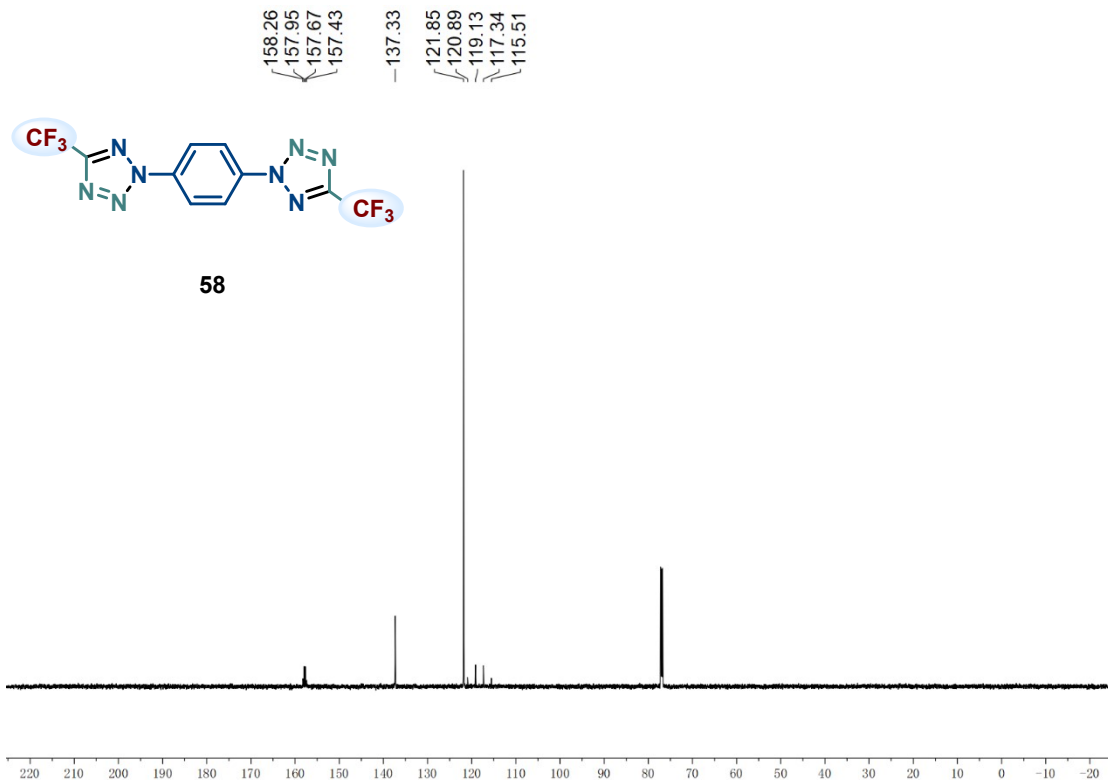

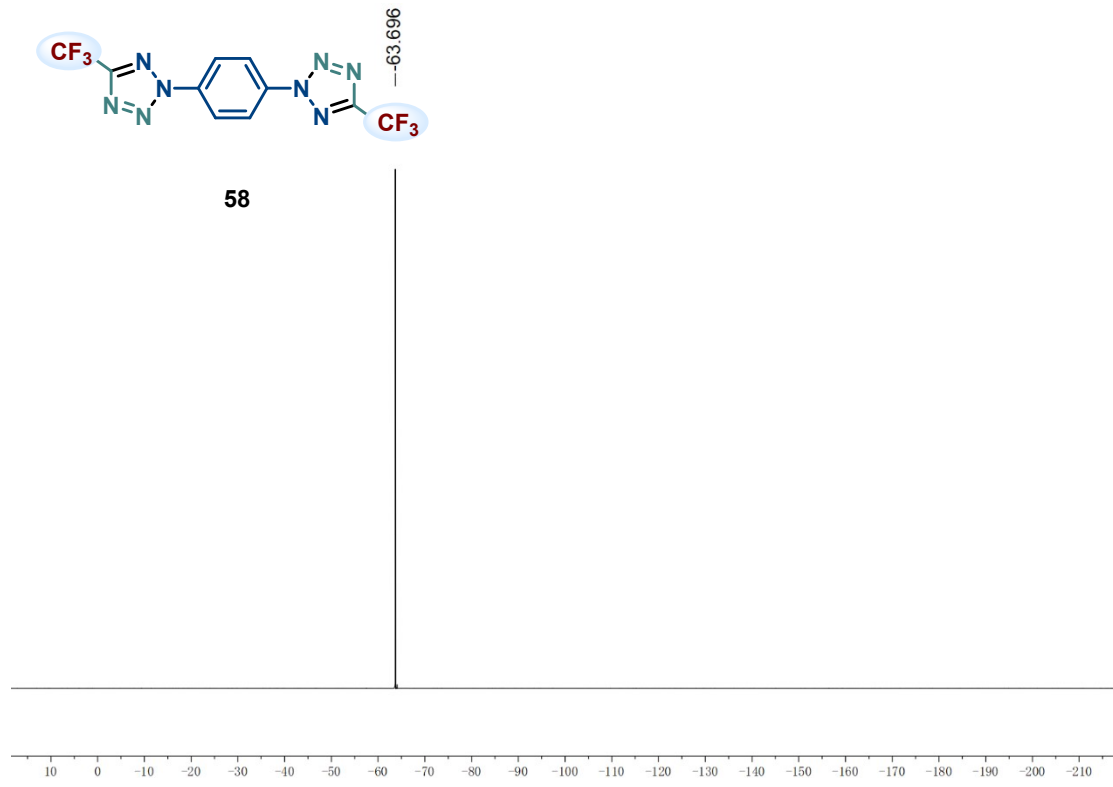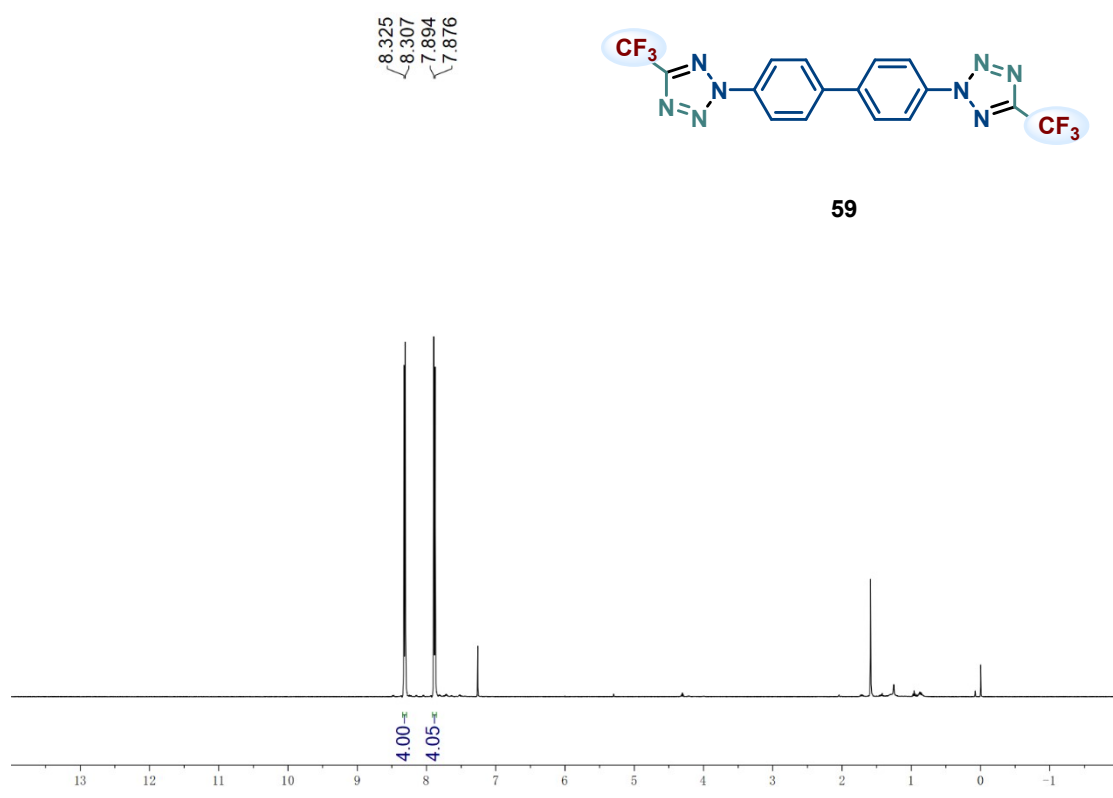

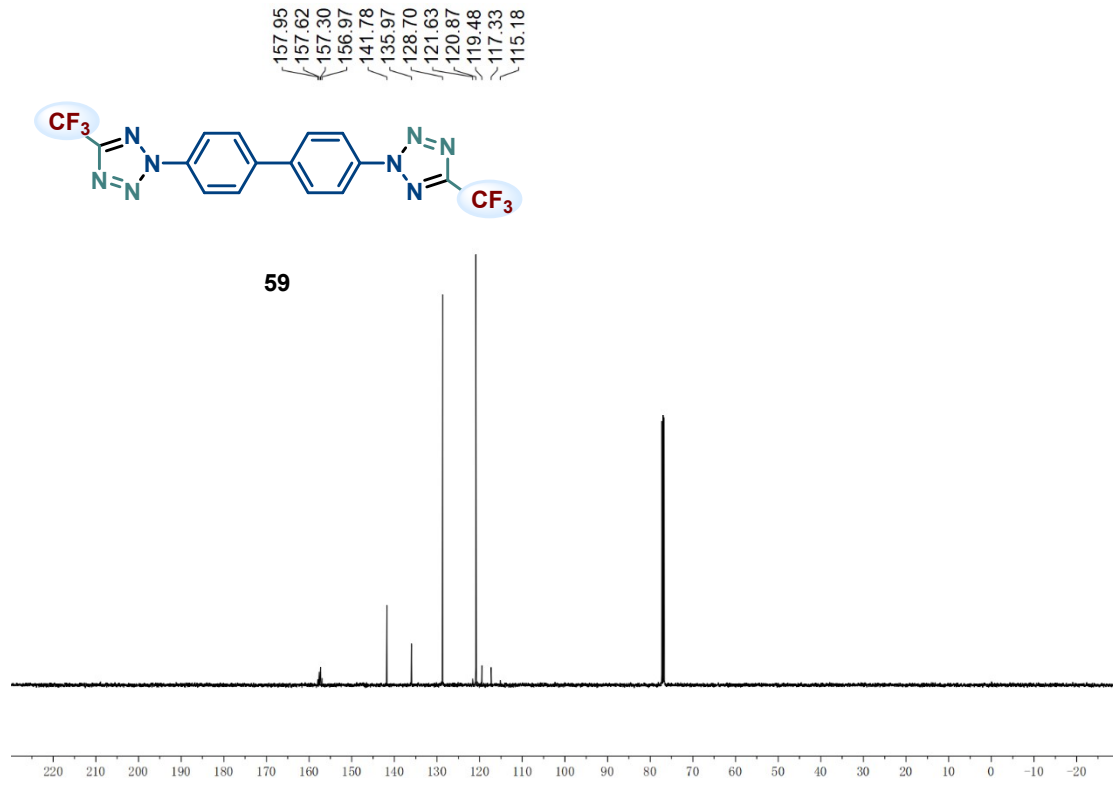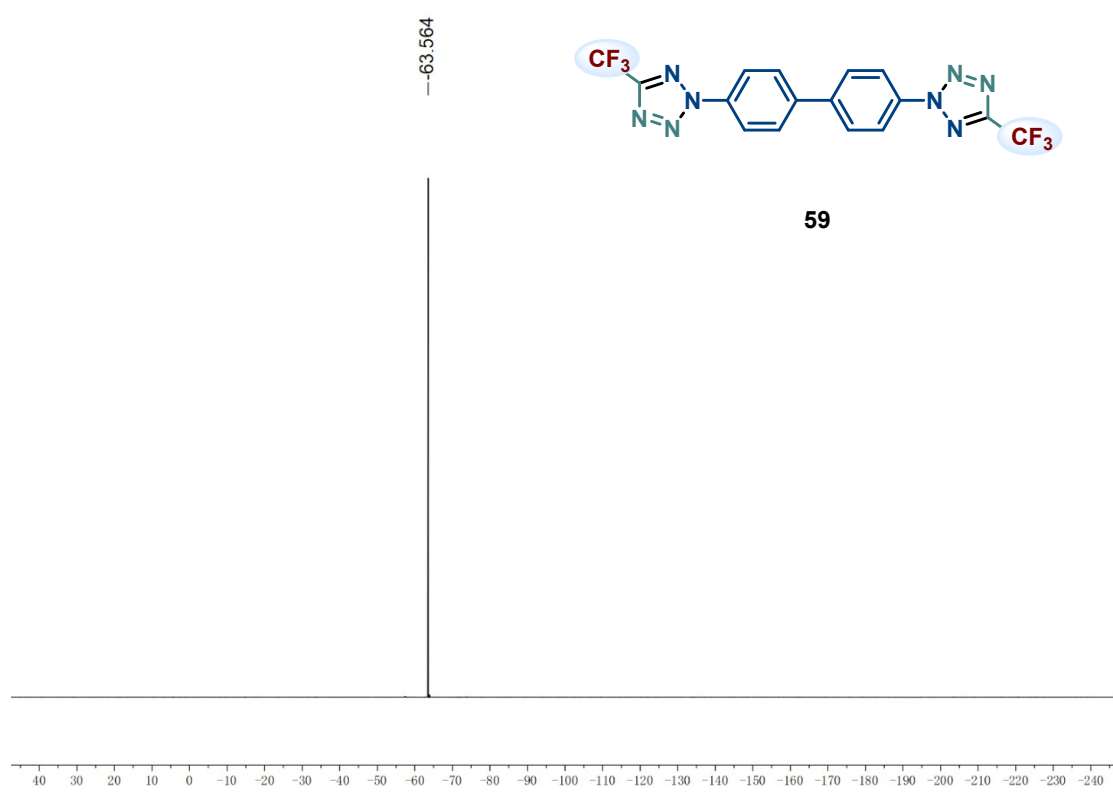

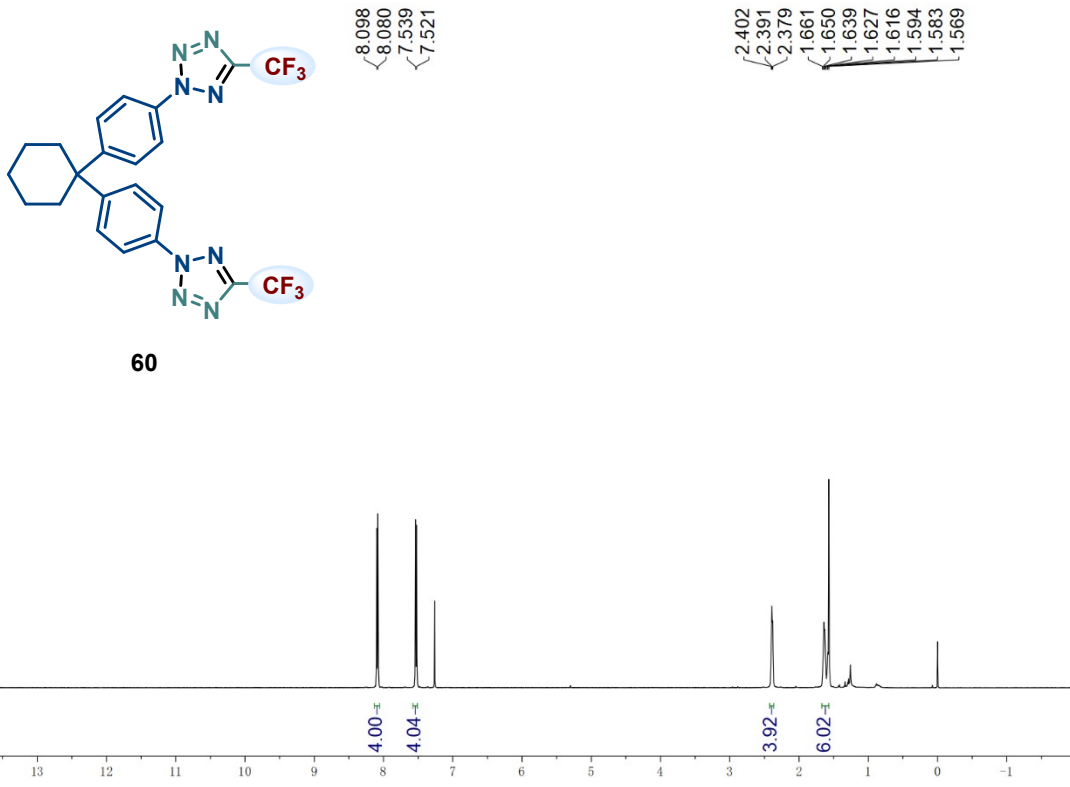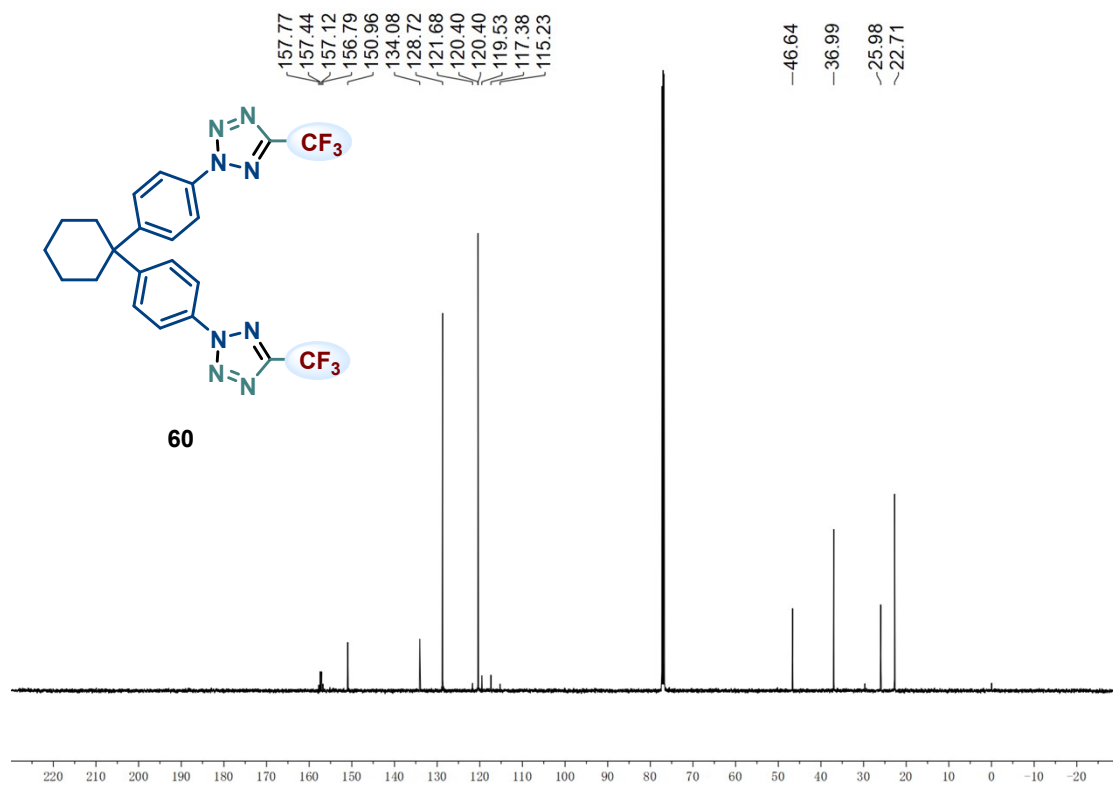

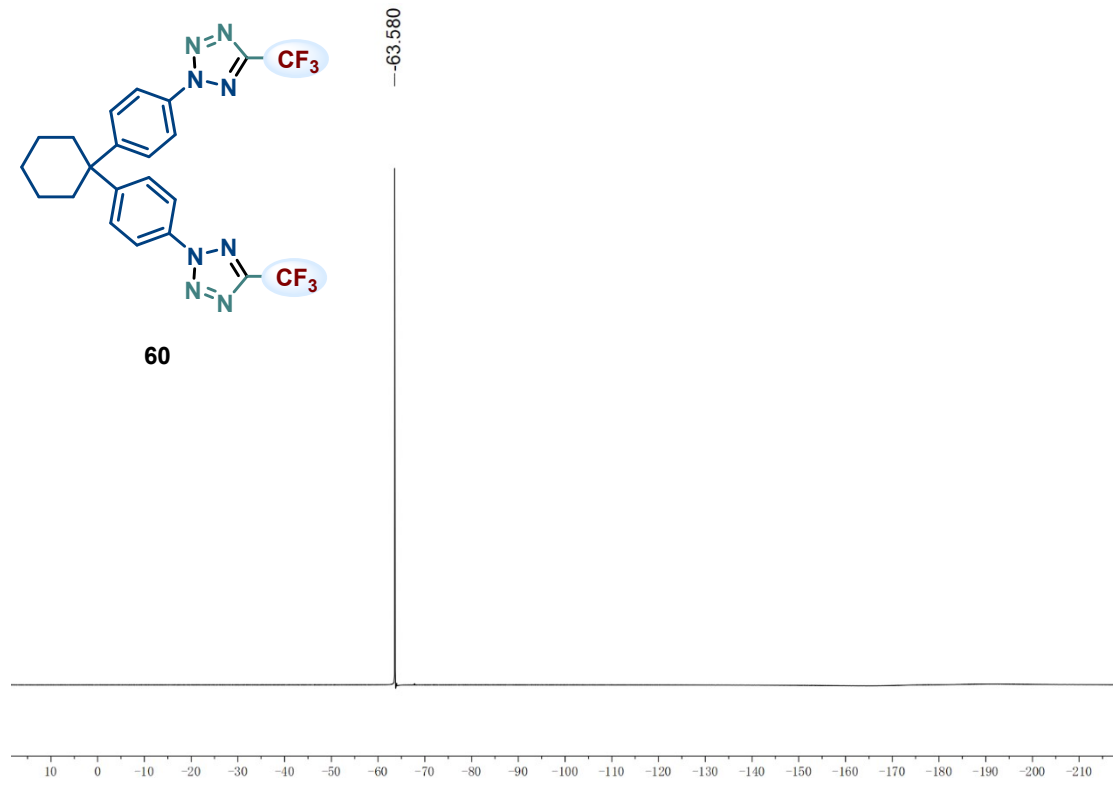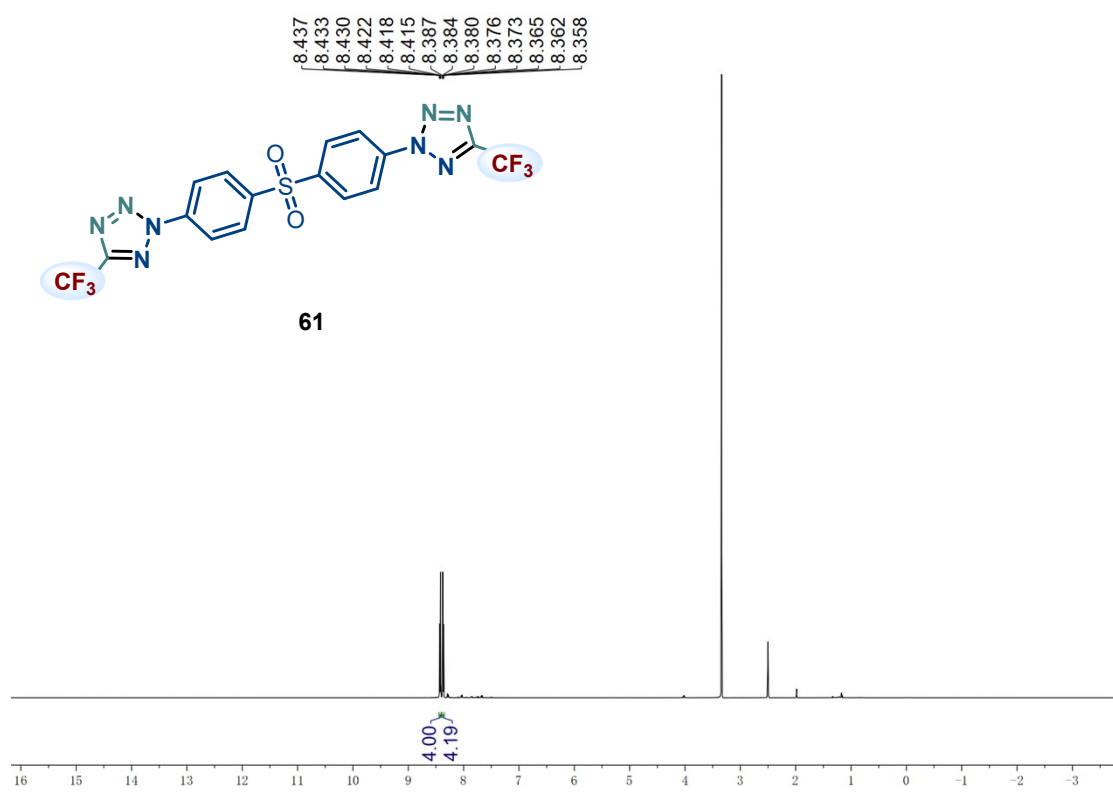



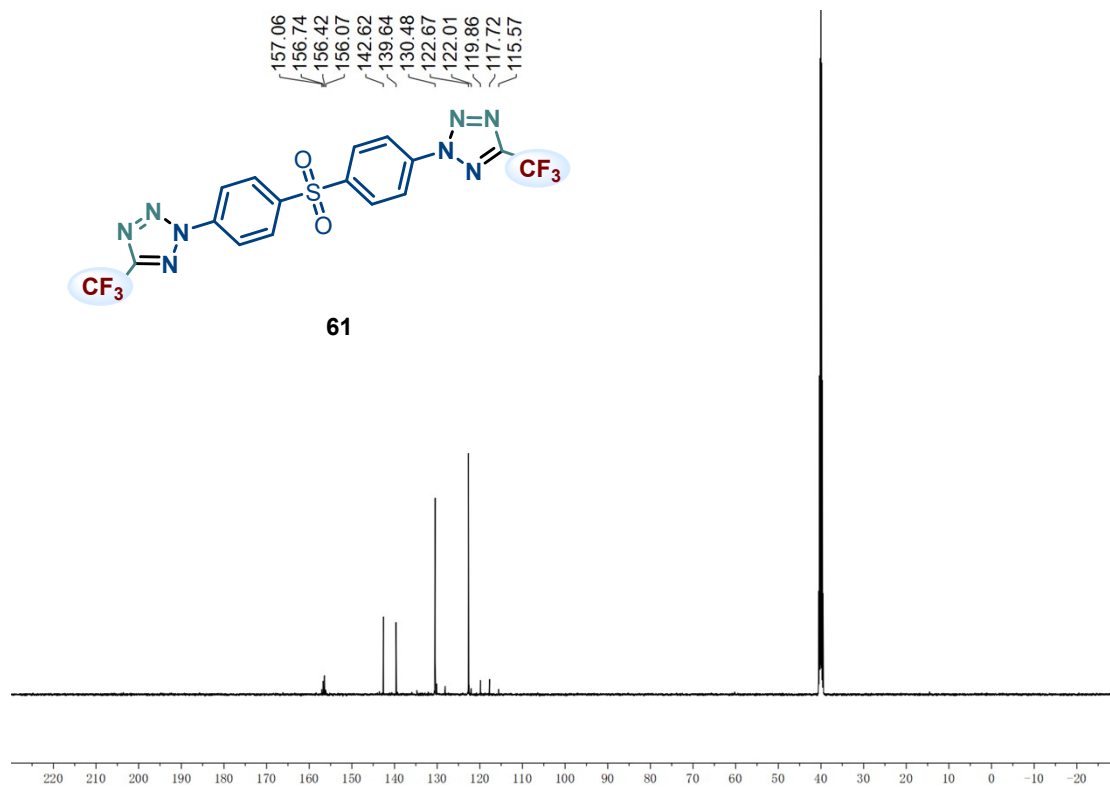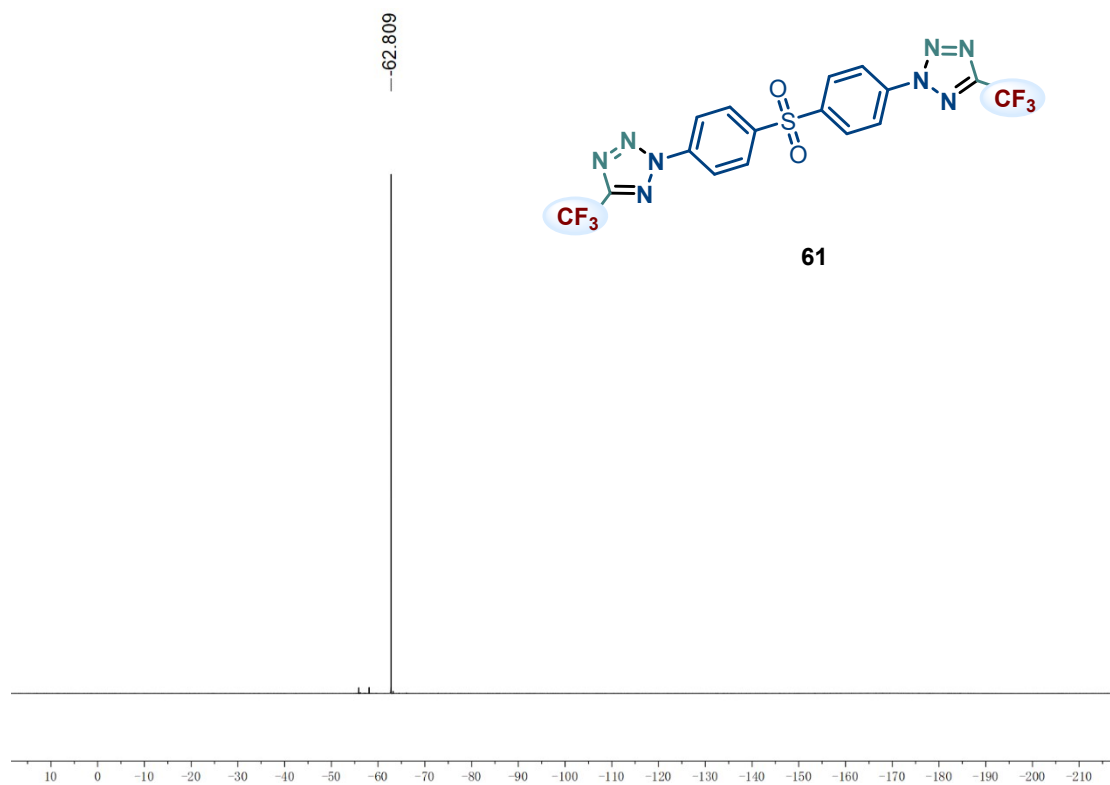

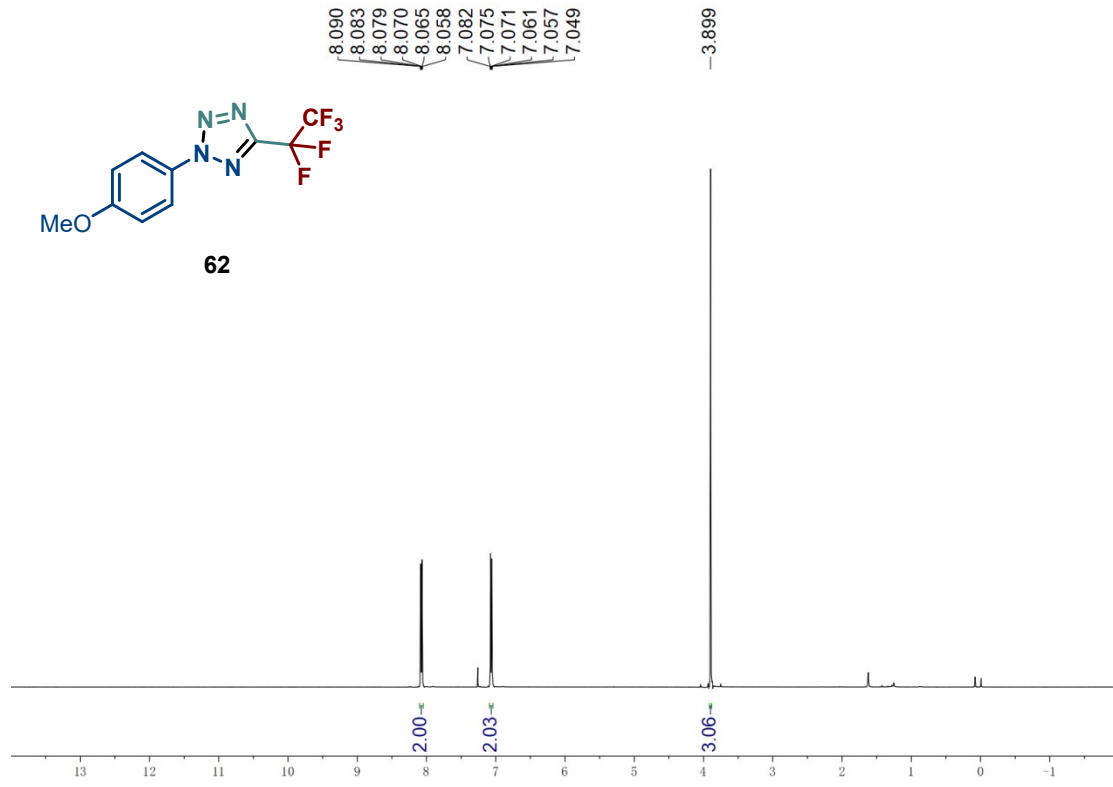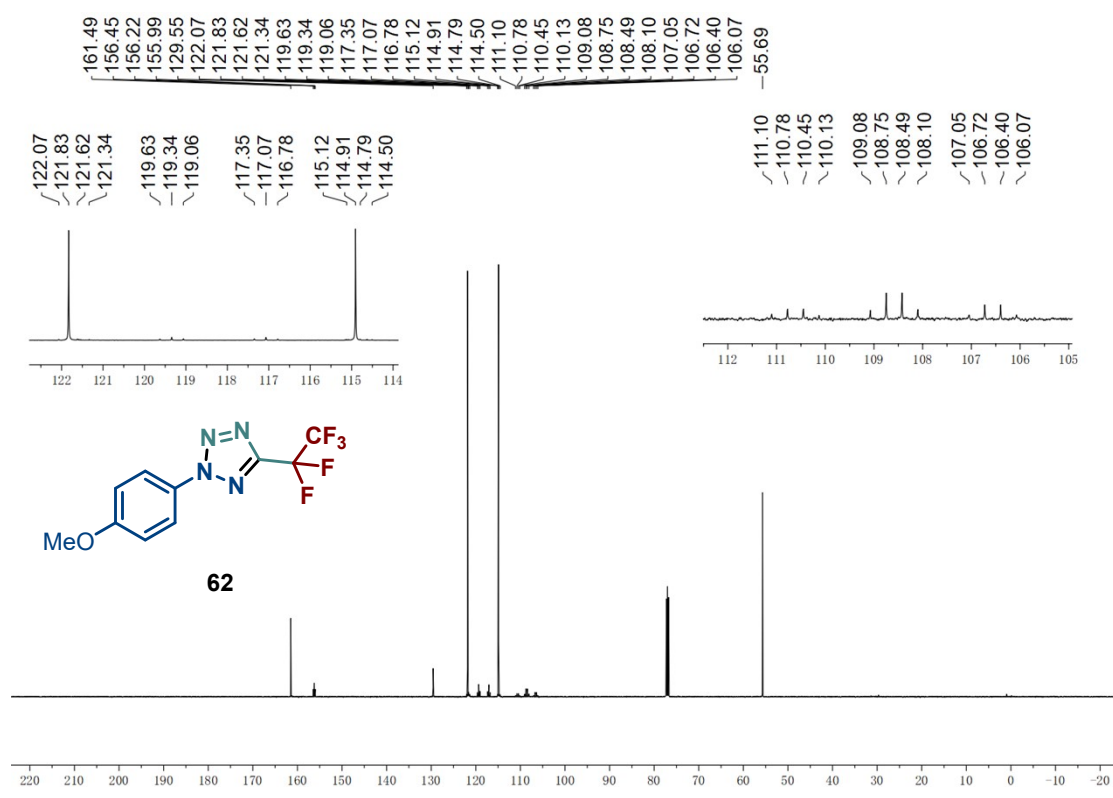

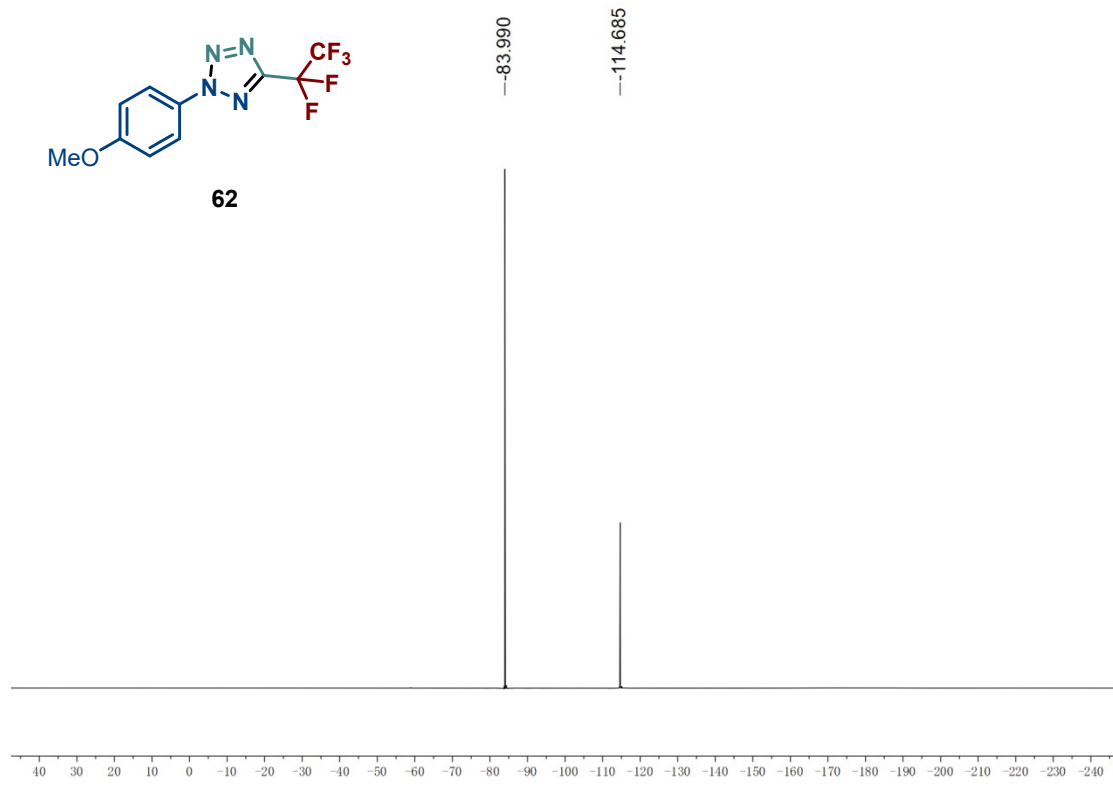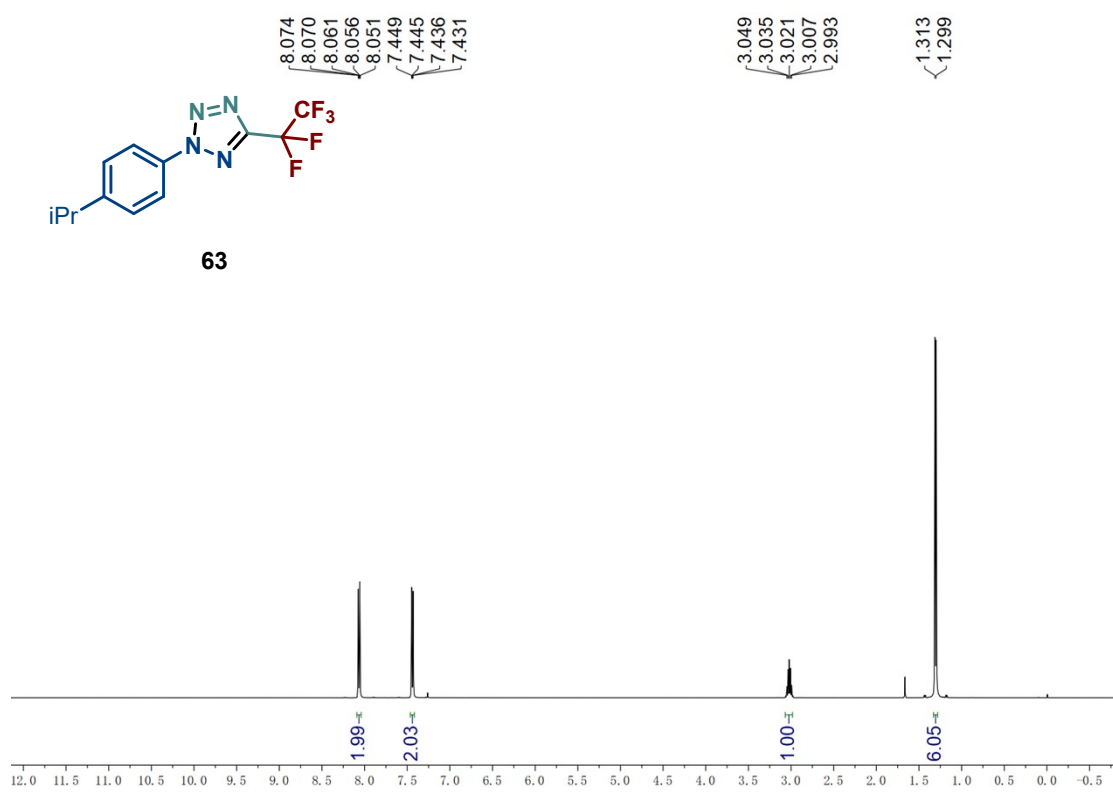

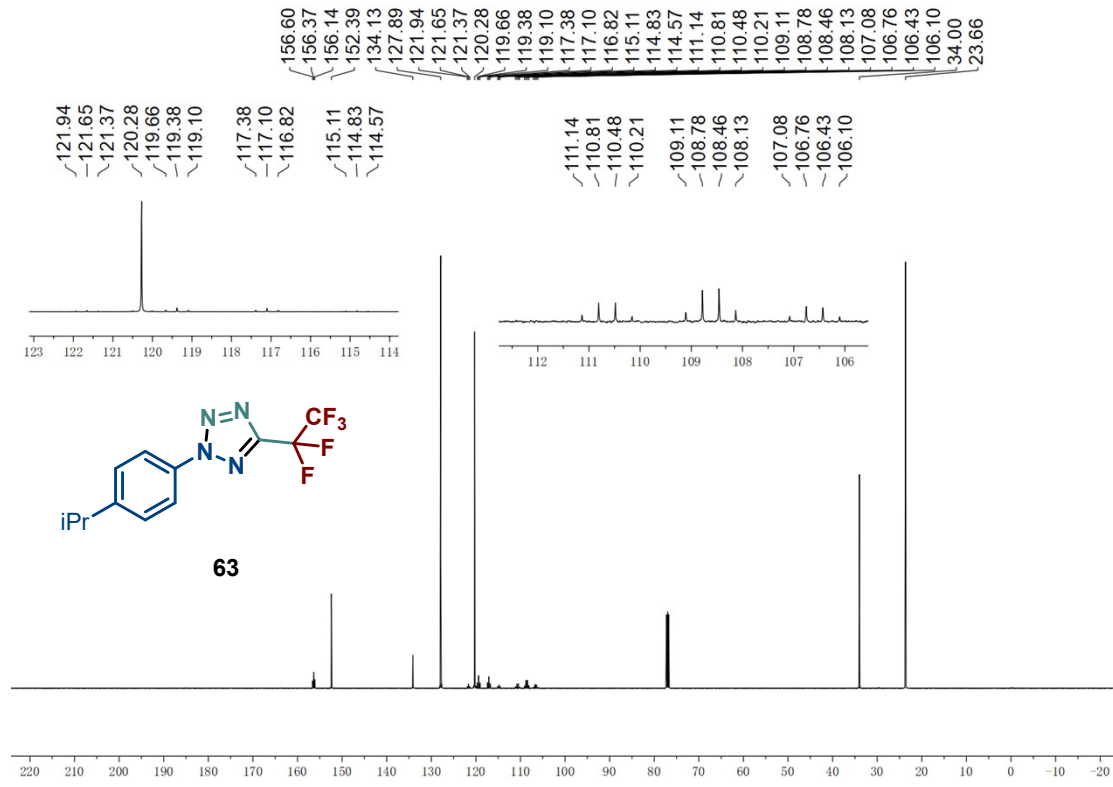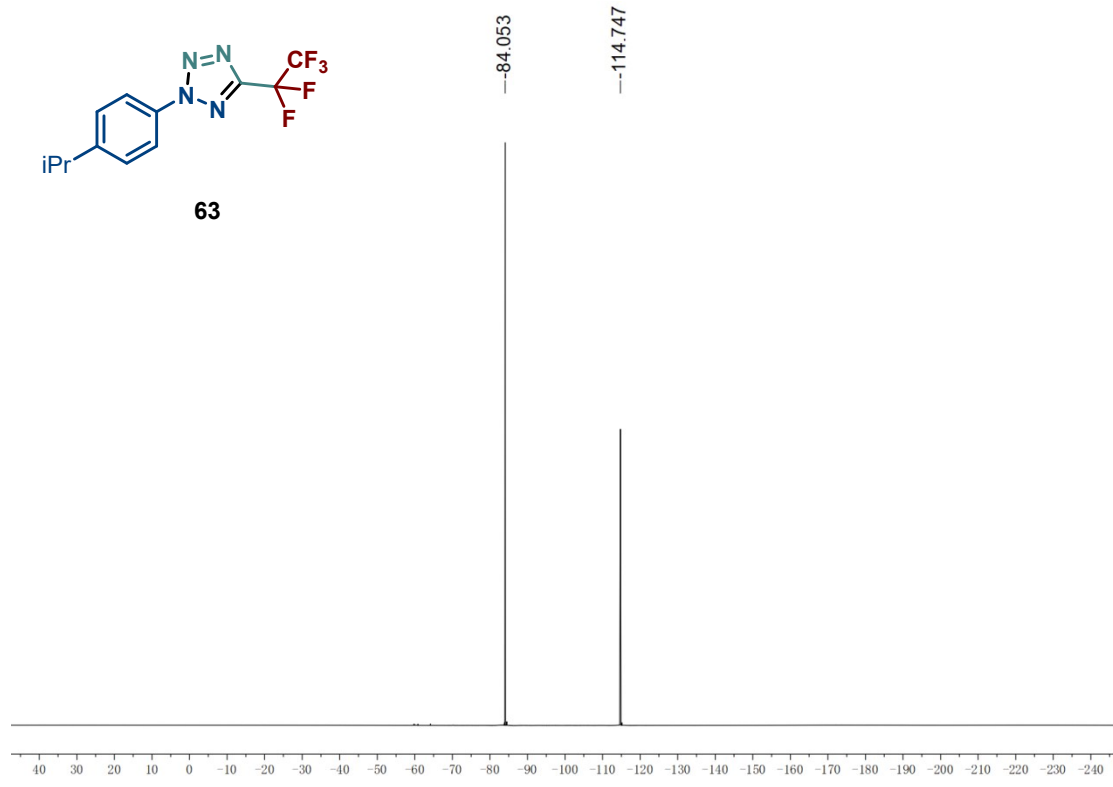

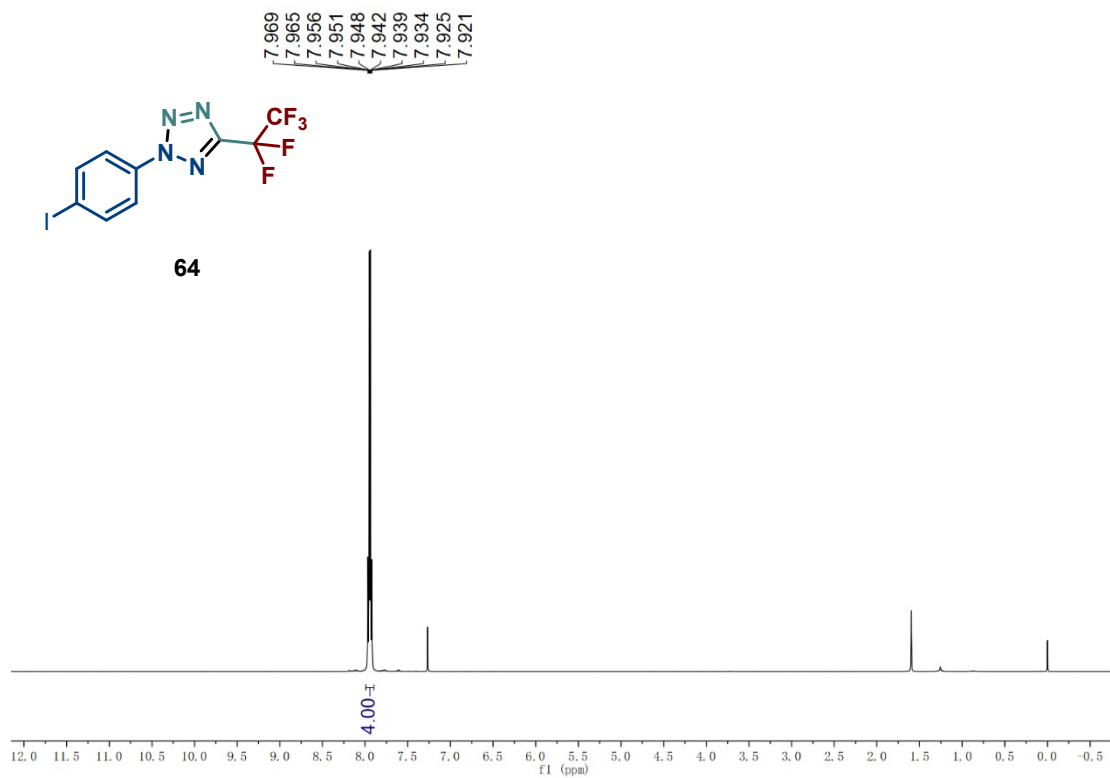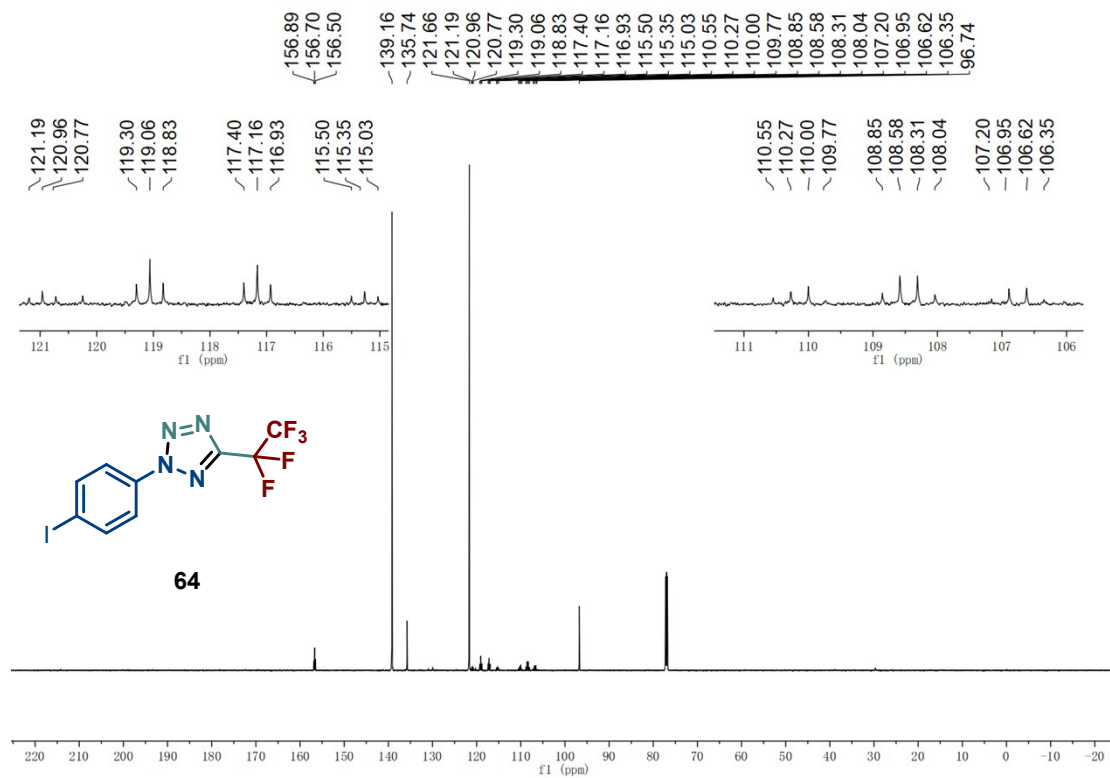

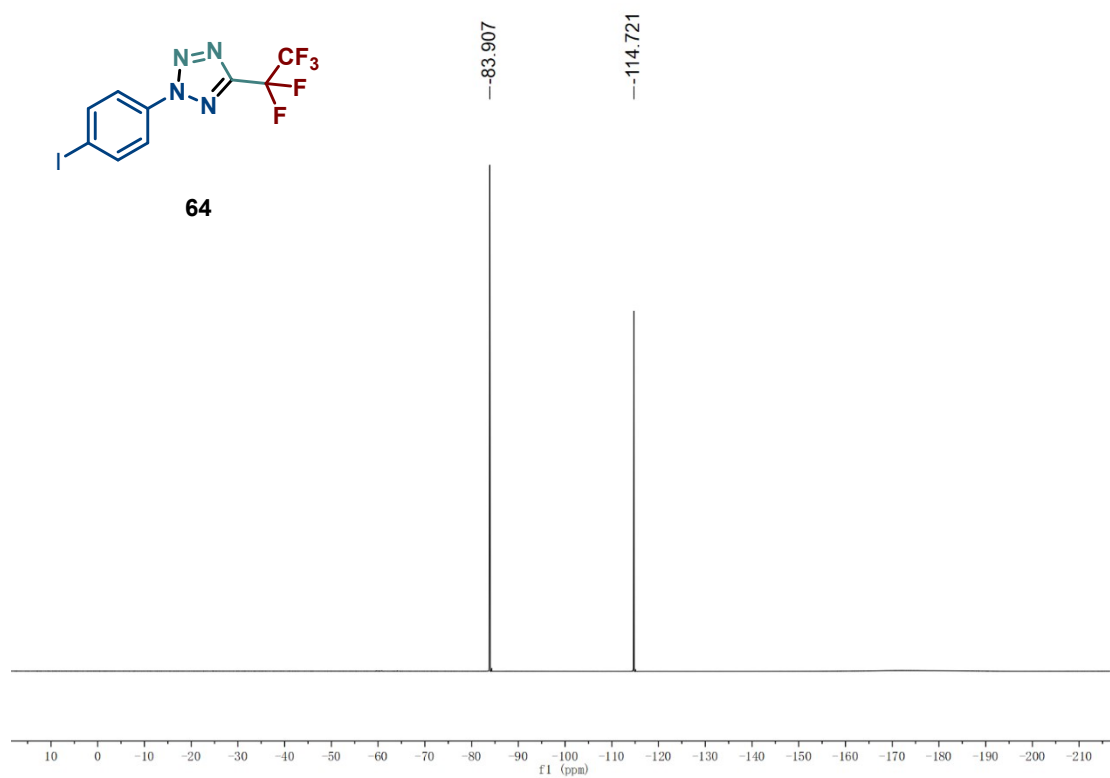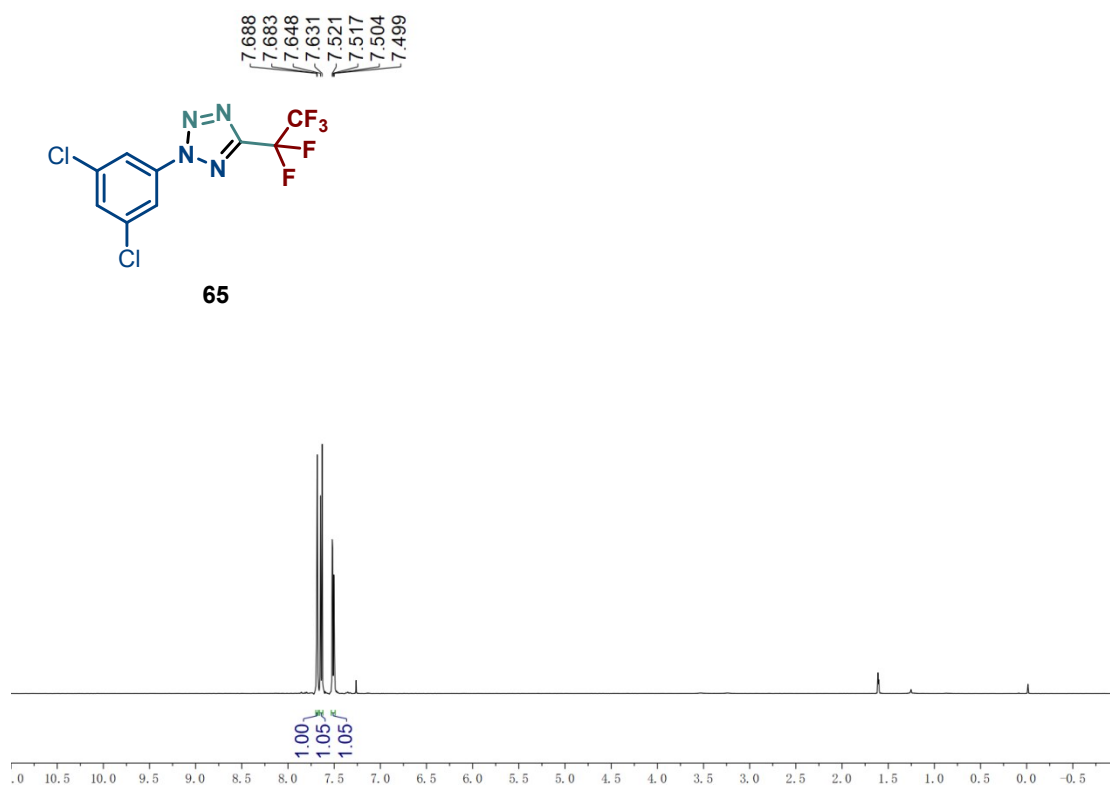

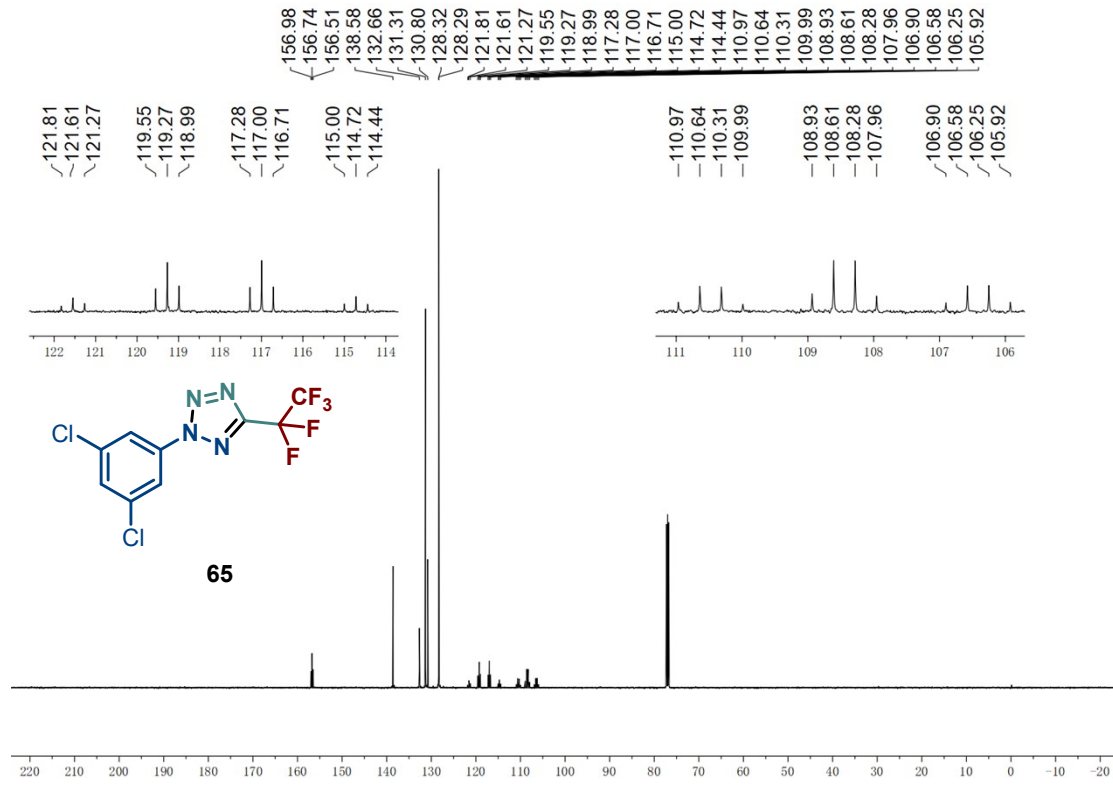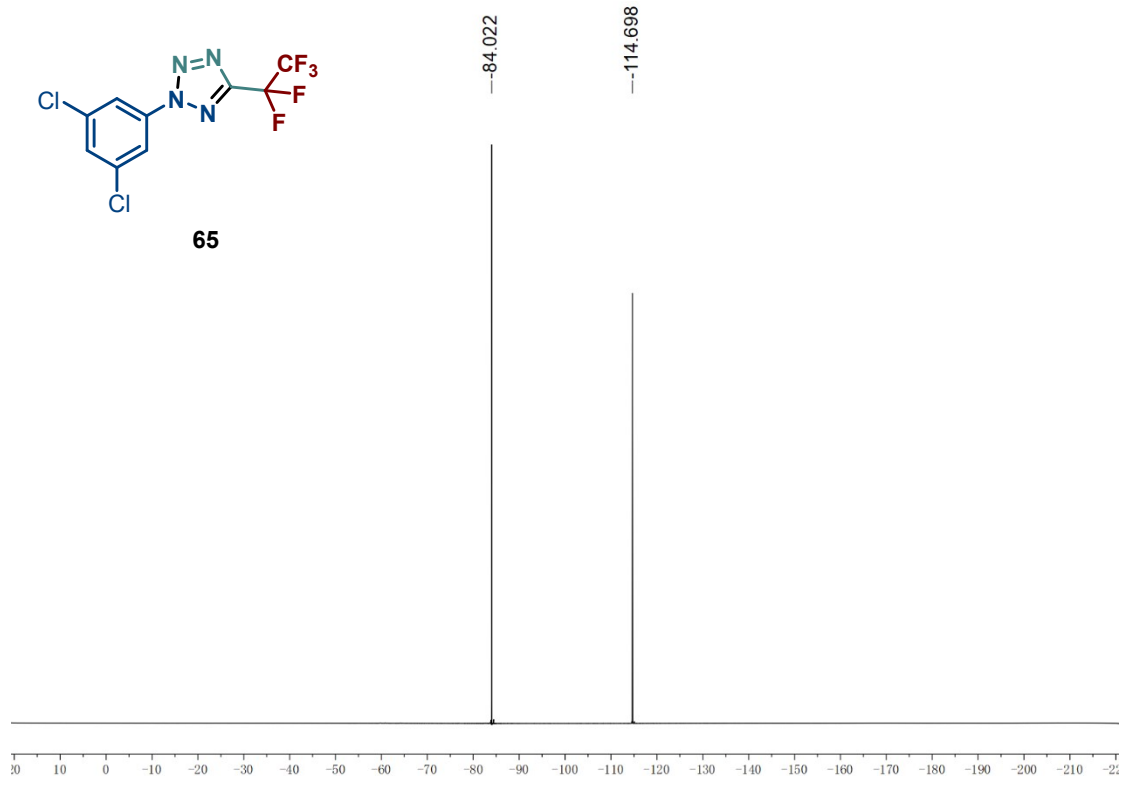

8.132  
8.115  
8.020  
8.014  
8.010  
8.005  
8.001  
7.995  
7.988  
7.986  
7.949  
7.942  
7.935  
7.932  
7.926  
7.922  
7.916  
7.911  
7.904  
7.901  
7.889  
7.887  
7.865  
7.661  
7.656  
7.651  
7.647  
7.644  
7.641  
7.636  
7.631  
7.625

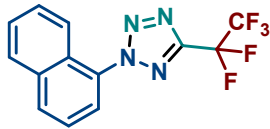

66

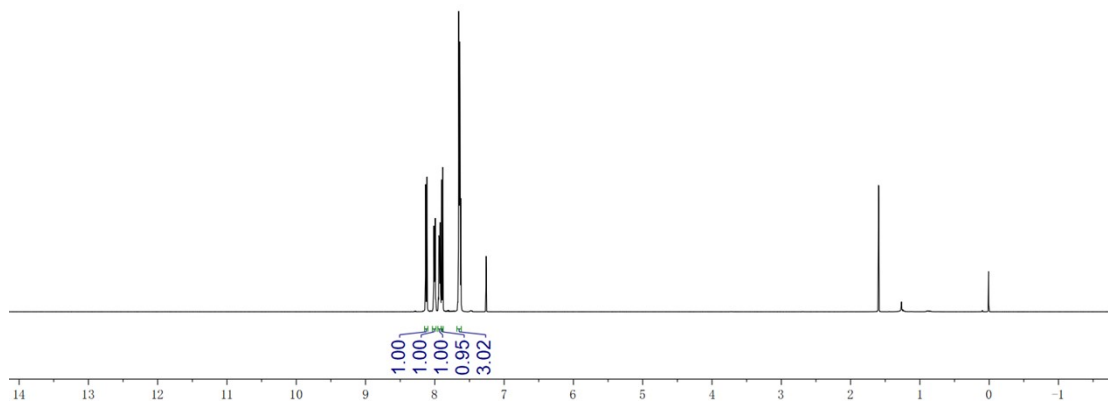

156.80  
156.56  
156.33  
134.23  
132.54  
132.19  
128.67  
128.53  
127.42  
126.57  
124.71  
123.72  
122.18  
121.97  
121.70  
121.41  
119.70  
119.42  
119.14  
117.43  
117.14  
116.86  
115.15  
114.87  
114.62  
111.18  
110.86  
110.53  
110.21  
109.16  
108.83  
108.51  
108.18  
107.15  
106.80  
106.48  
106.15

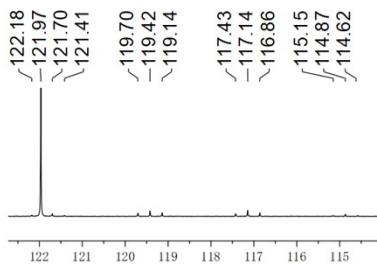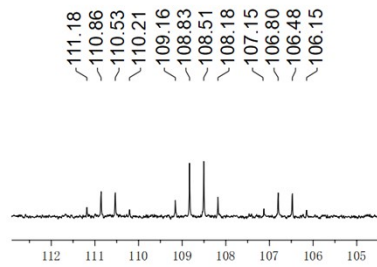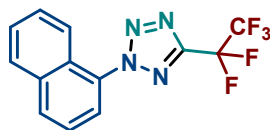

66

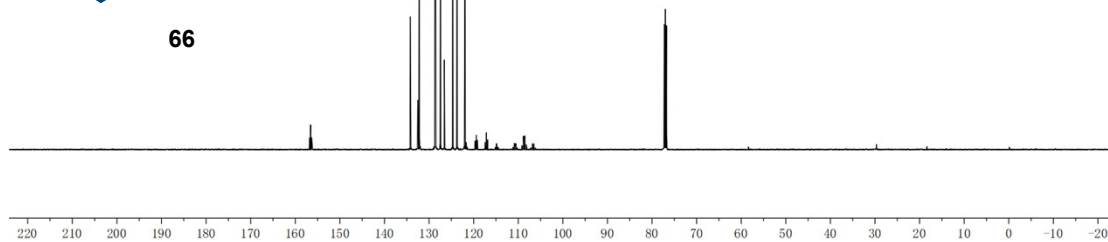



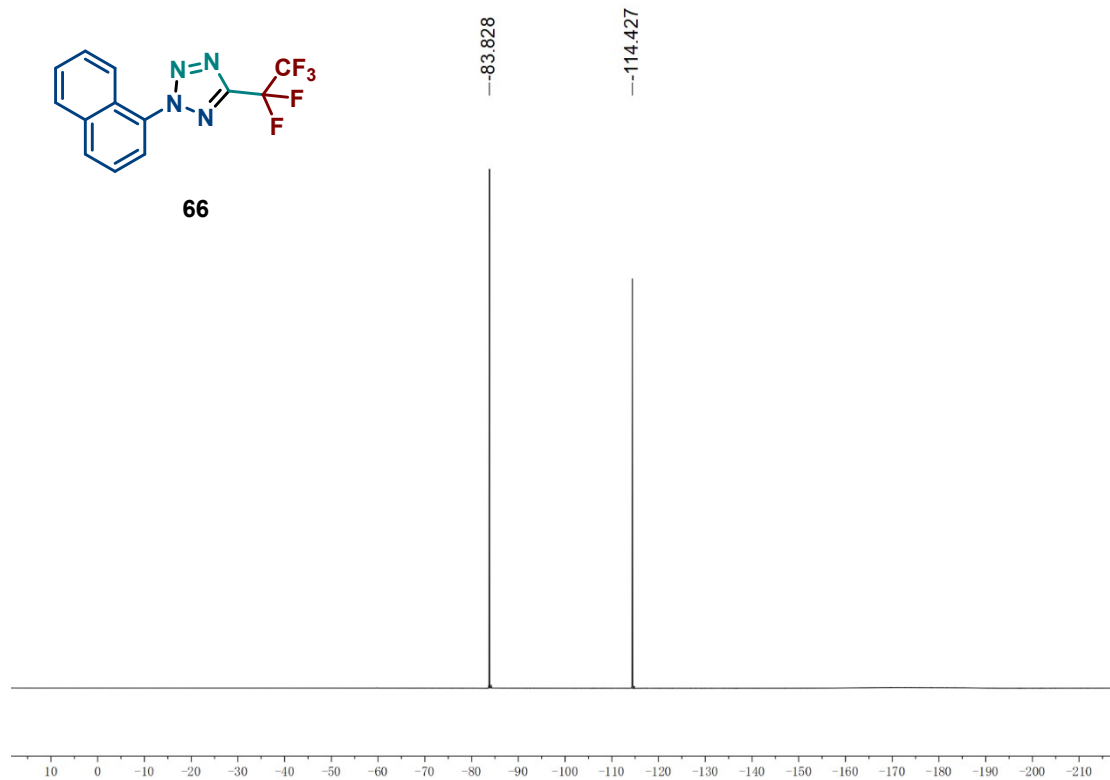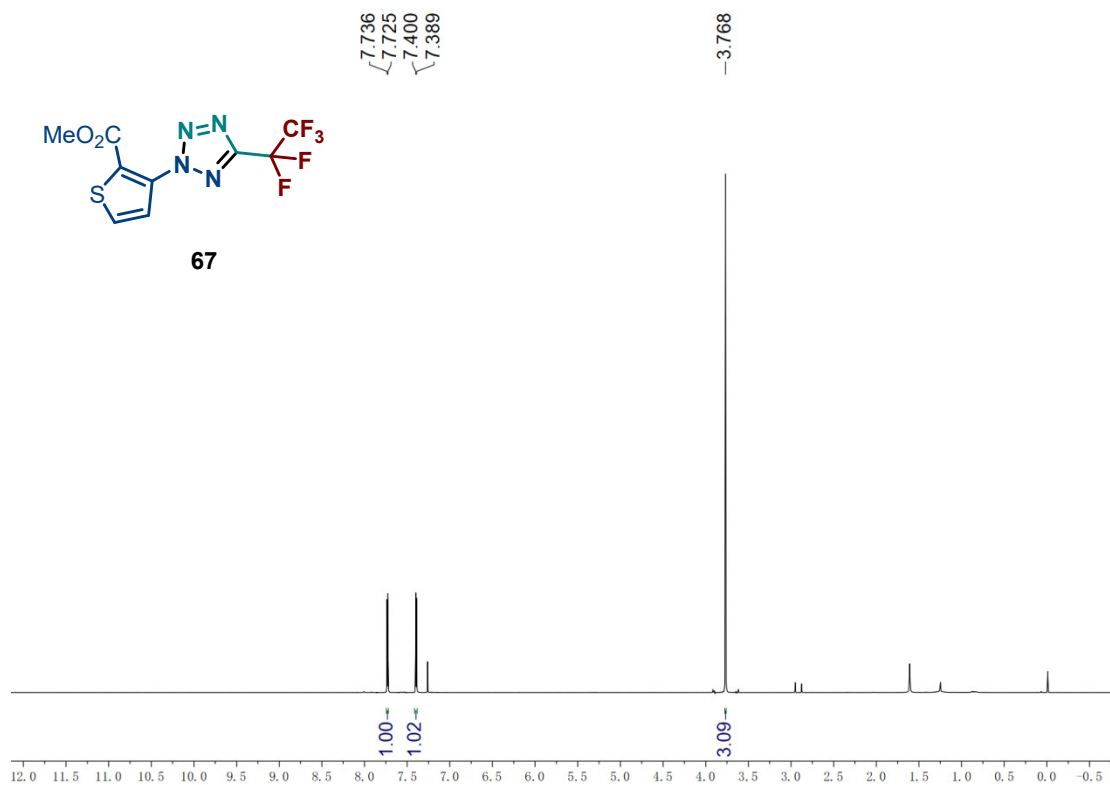

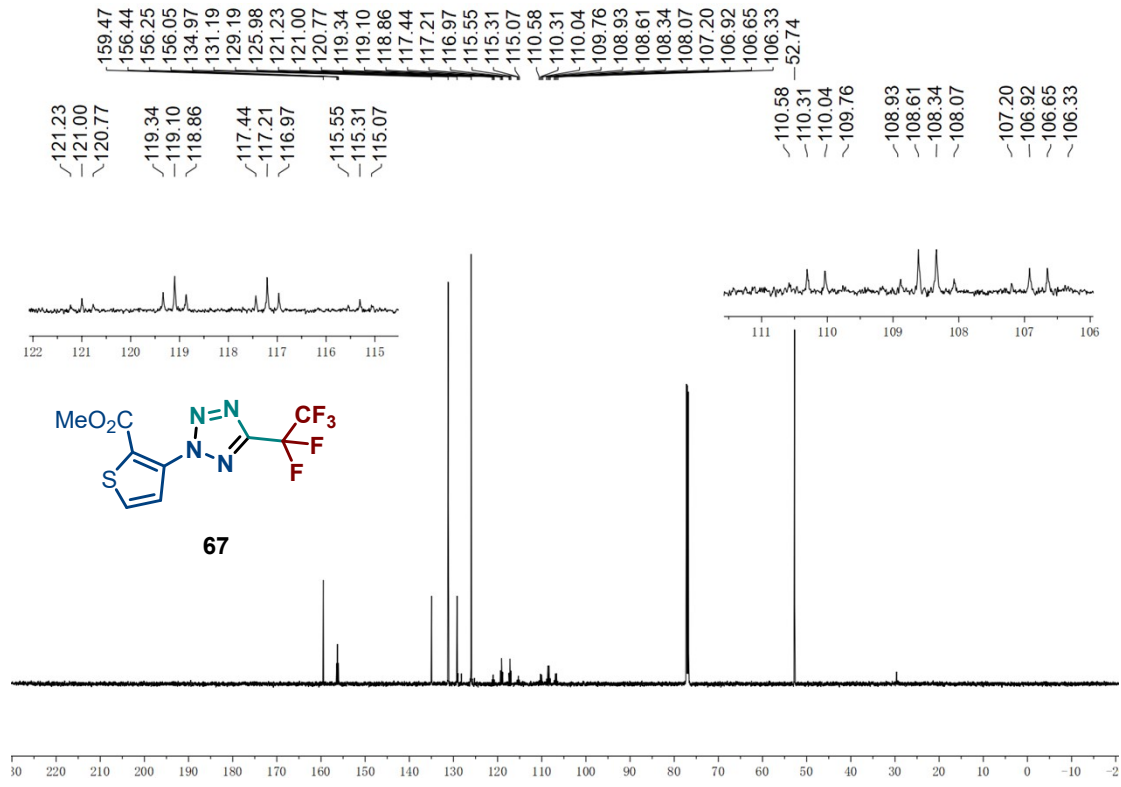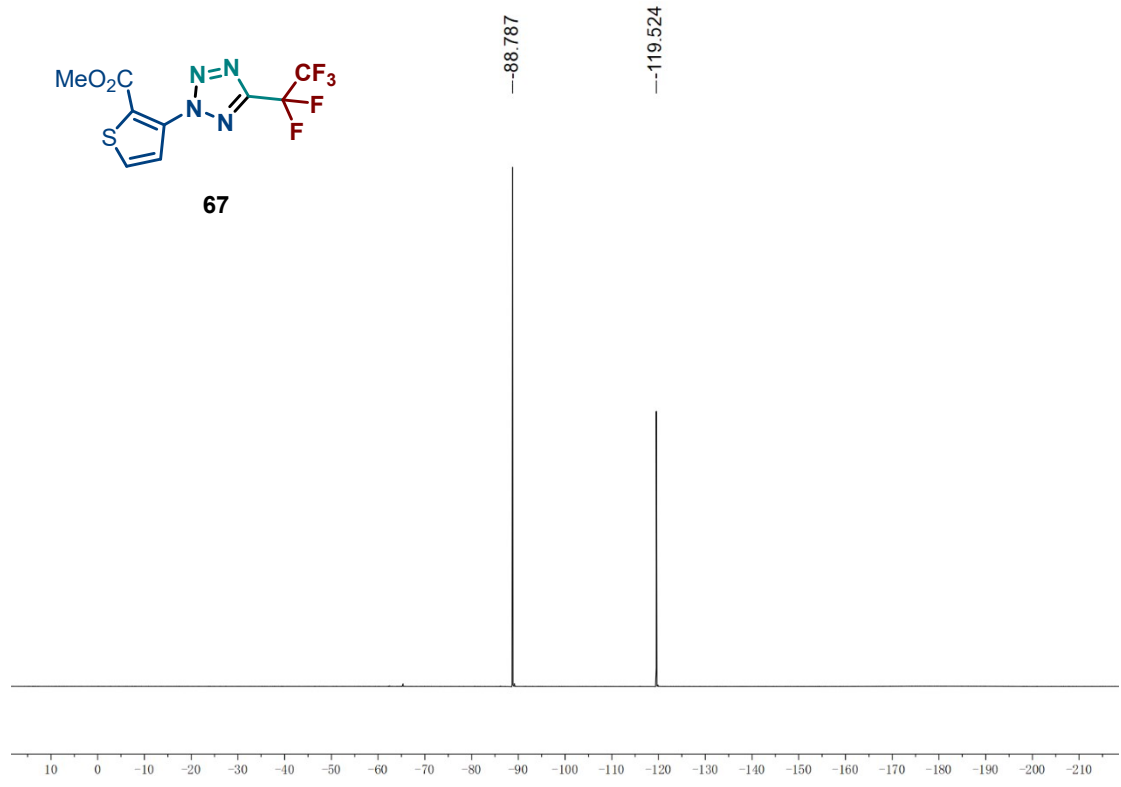

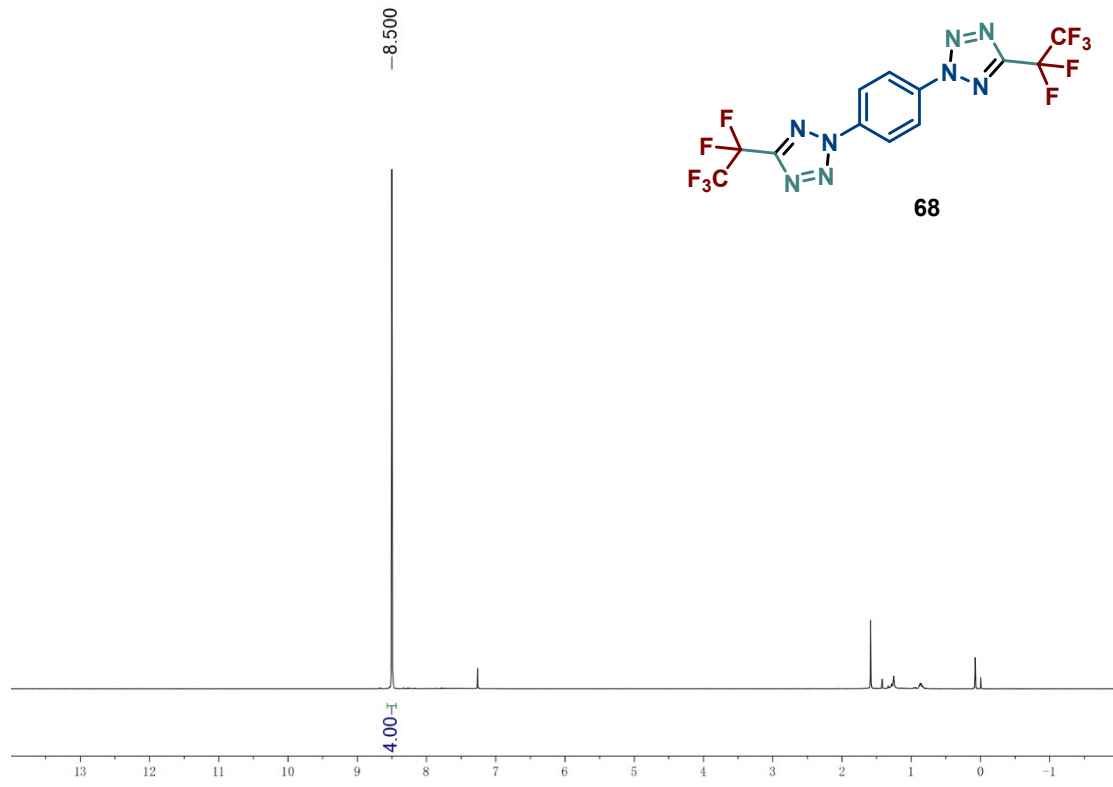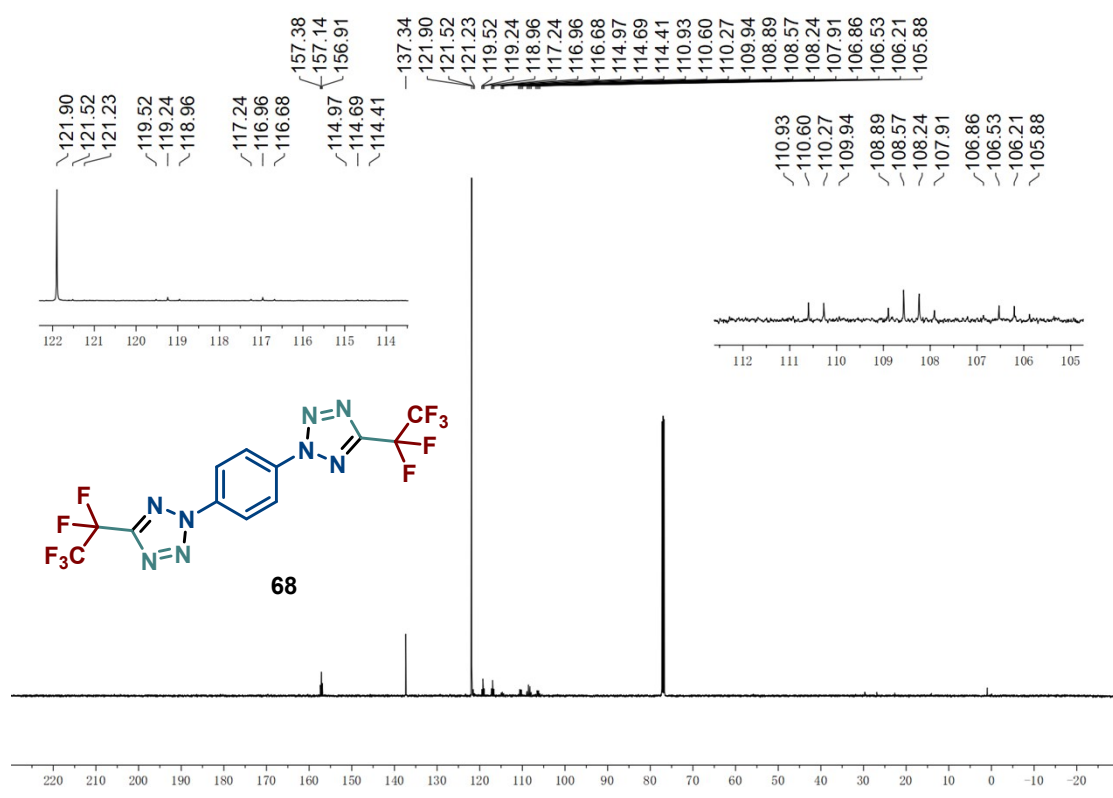

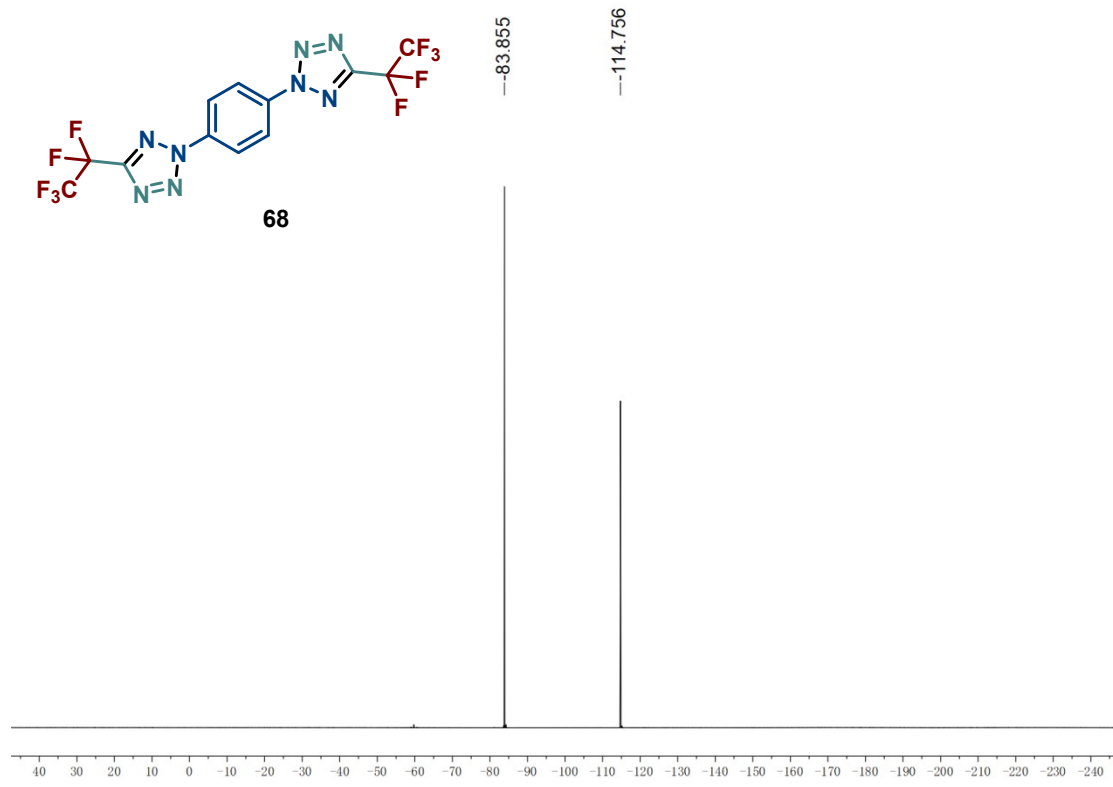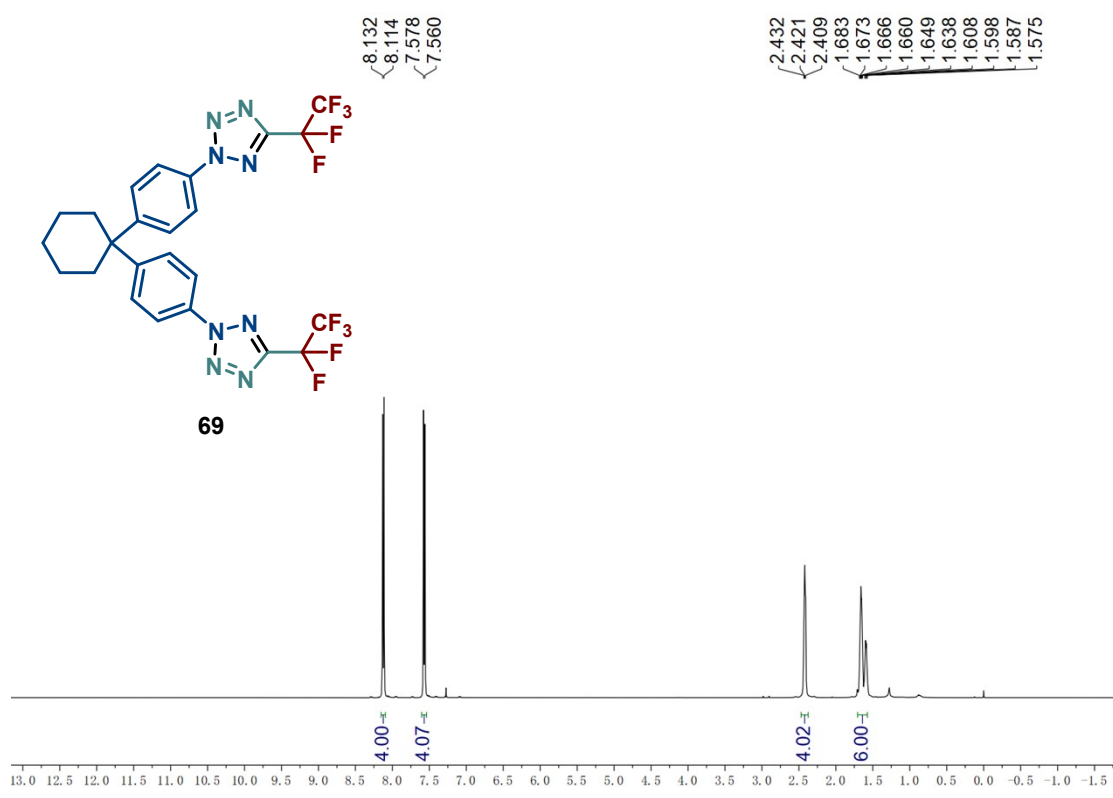

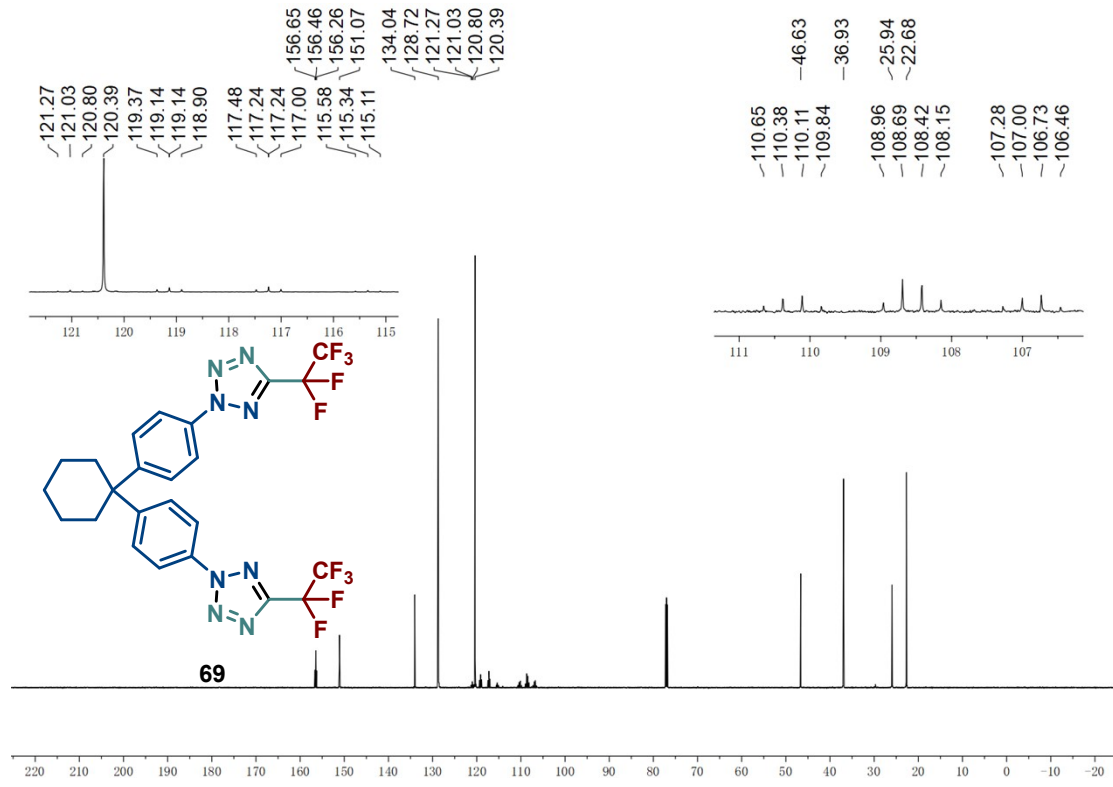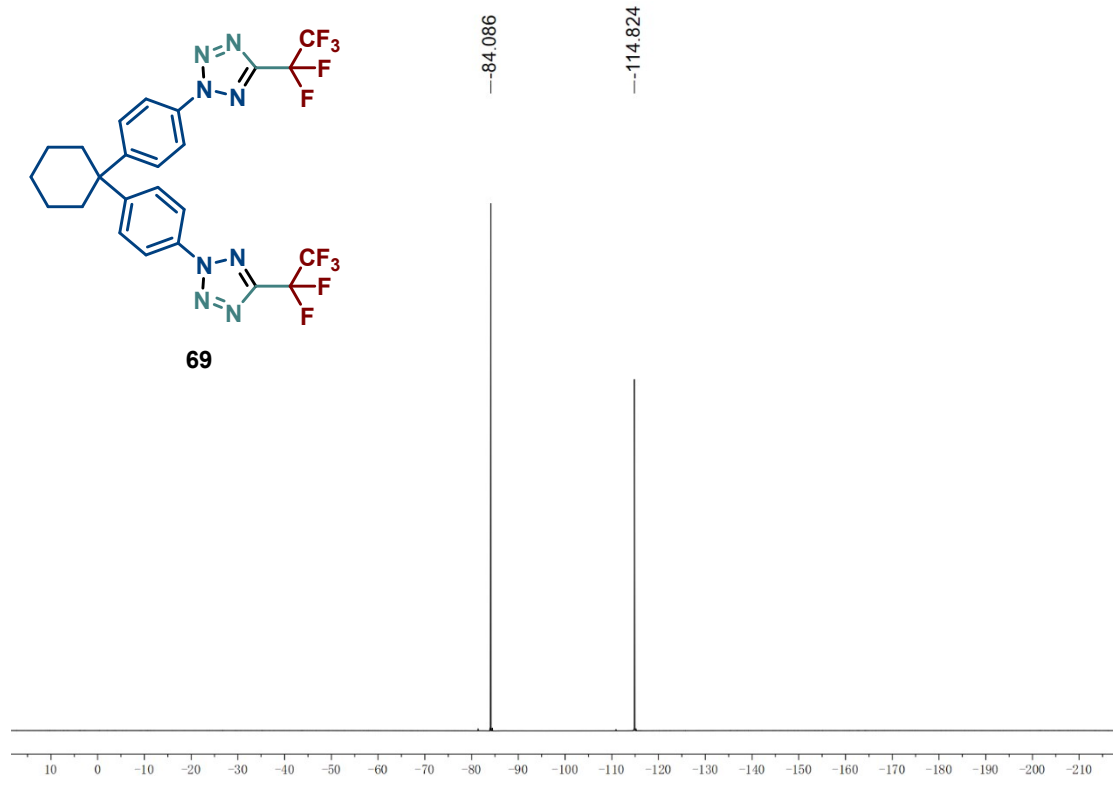

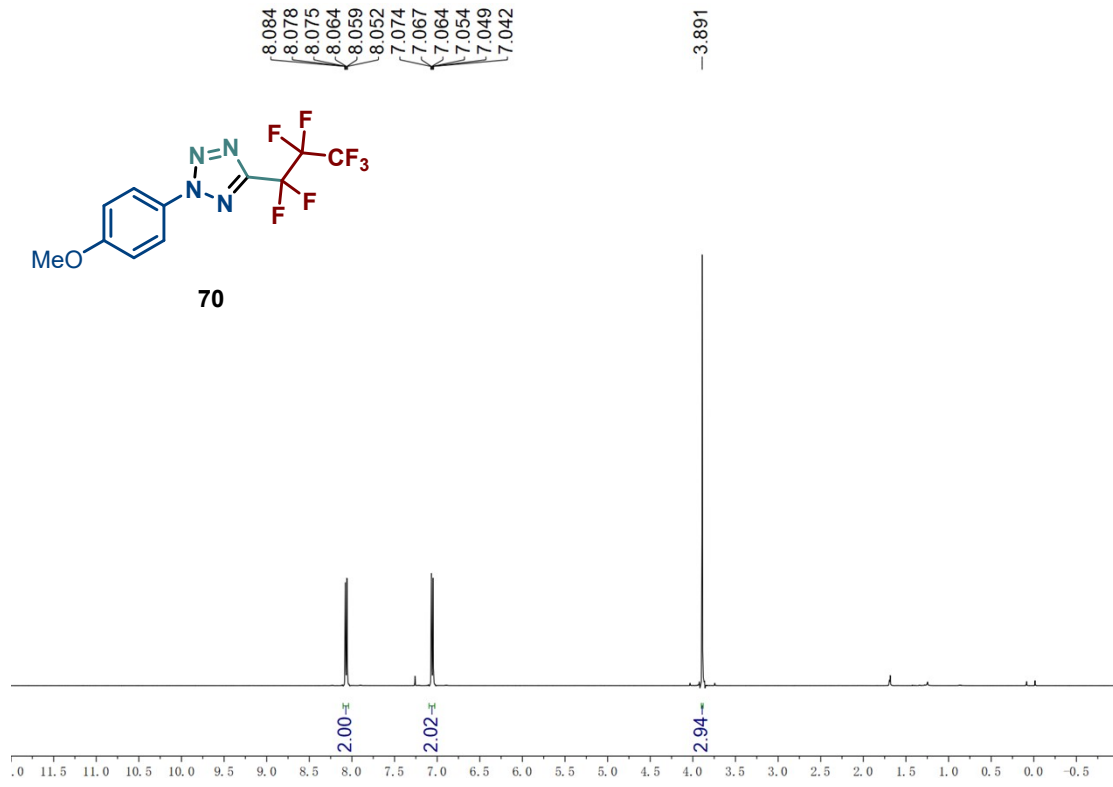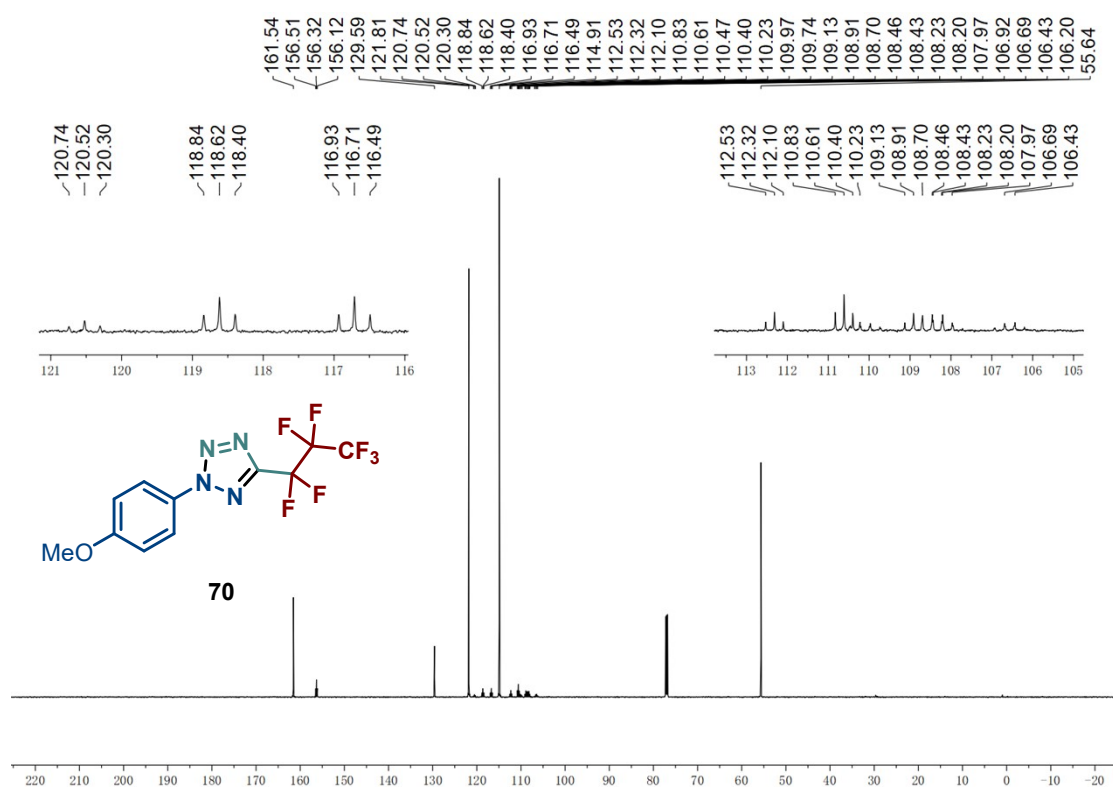

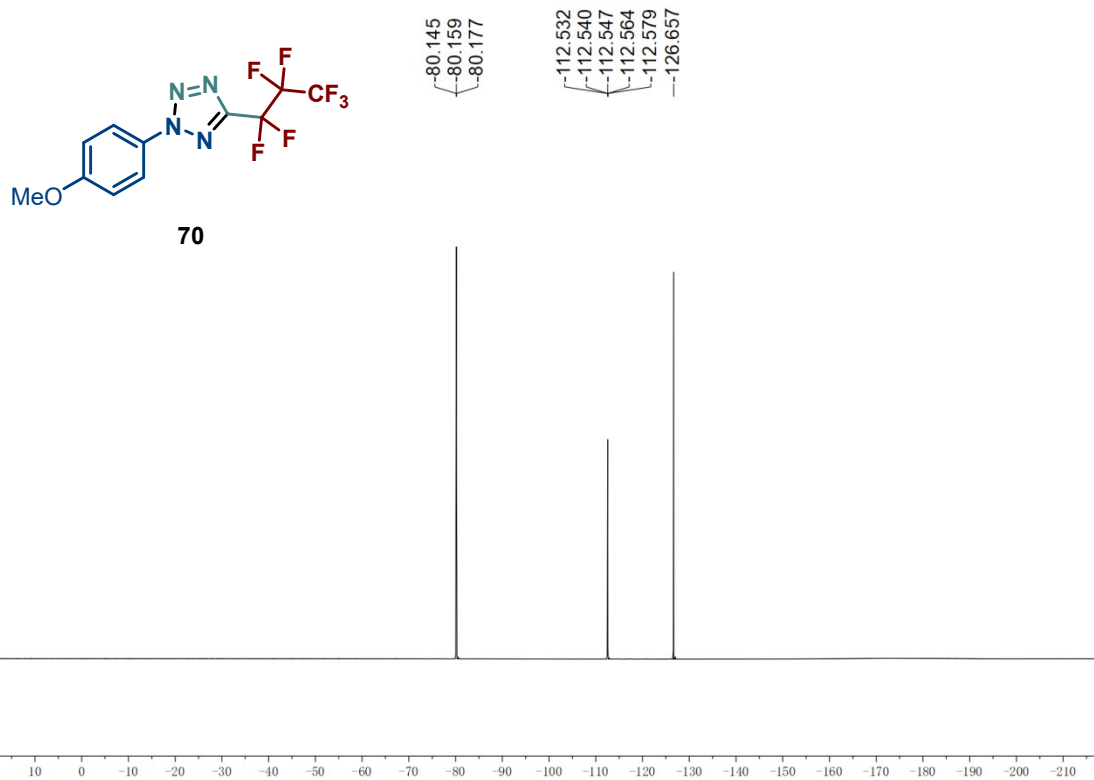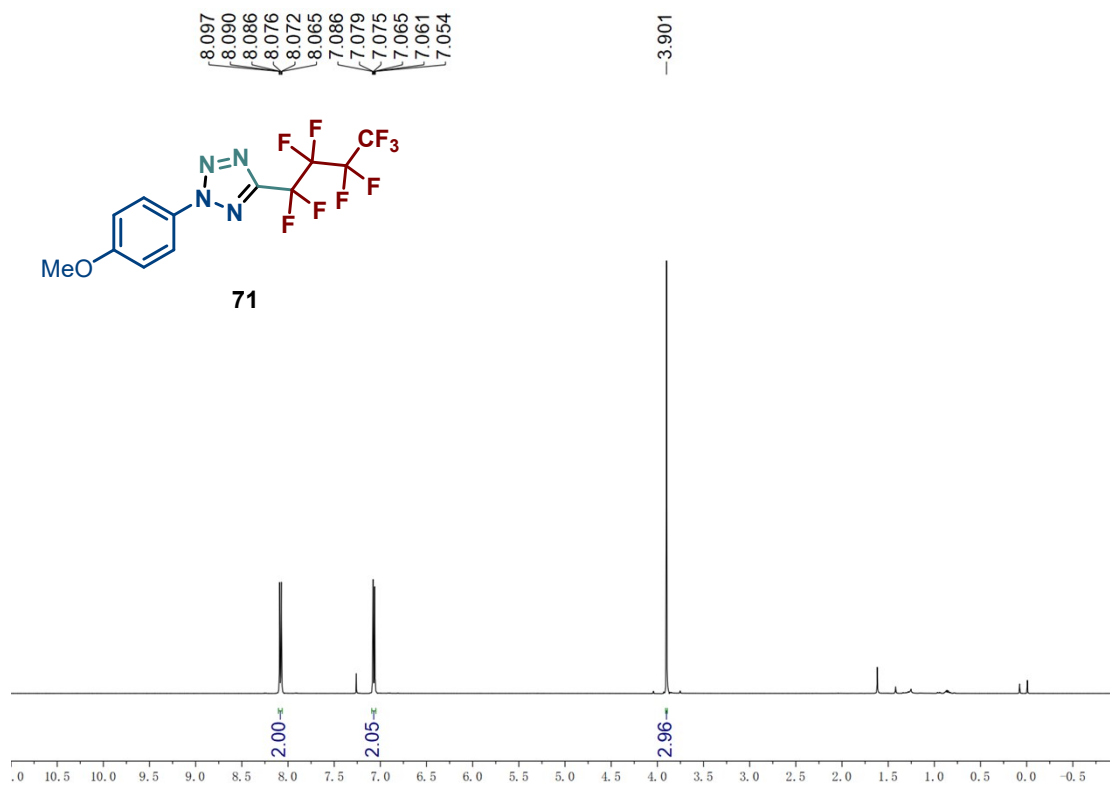

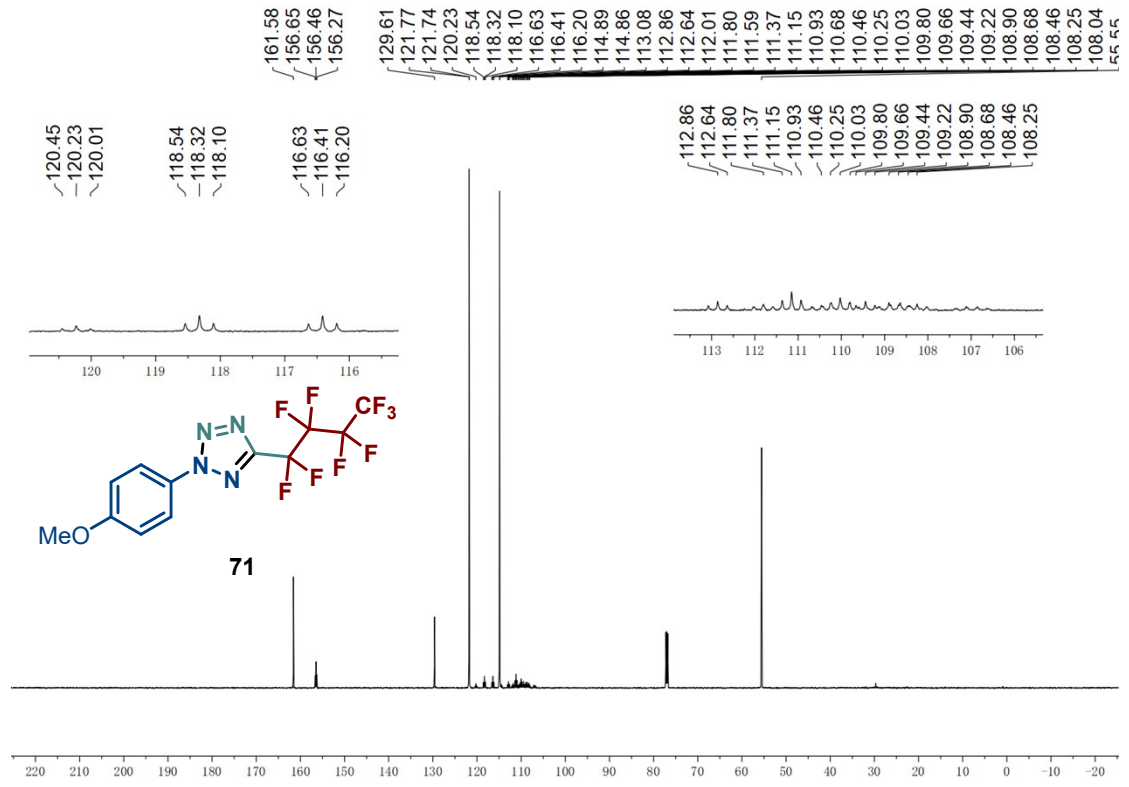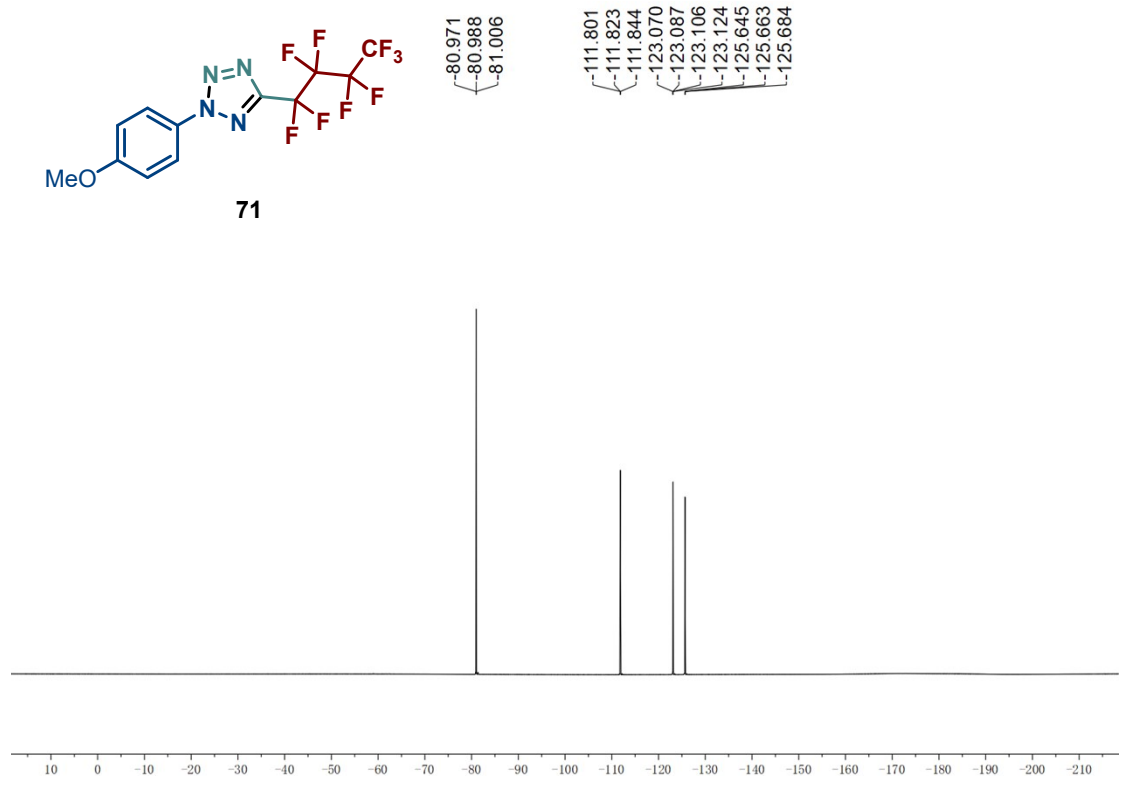



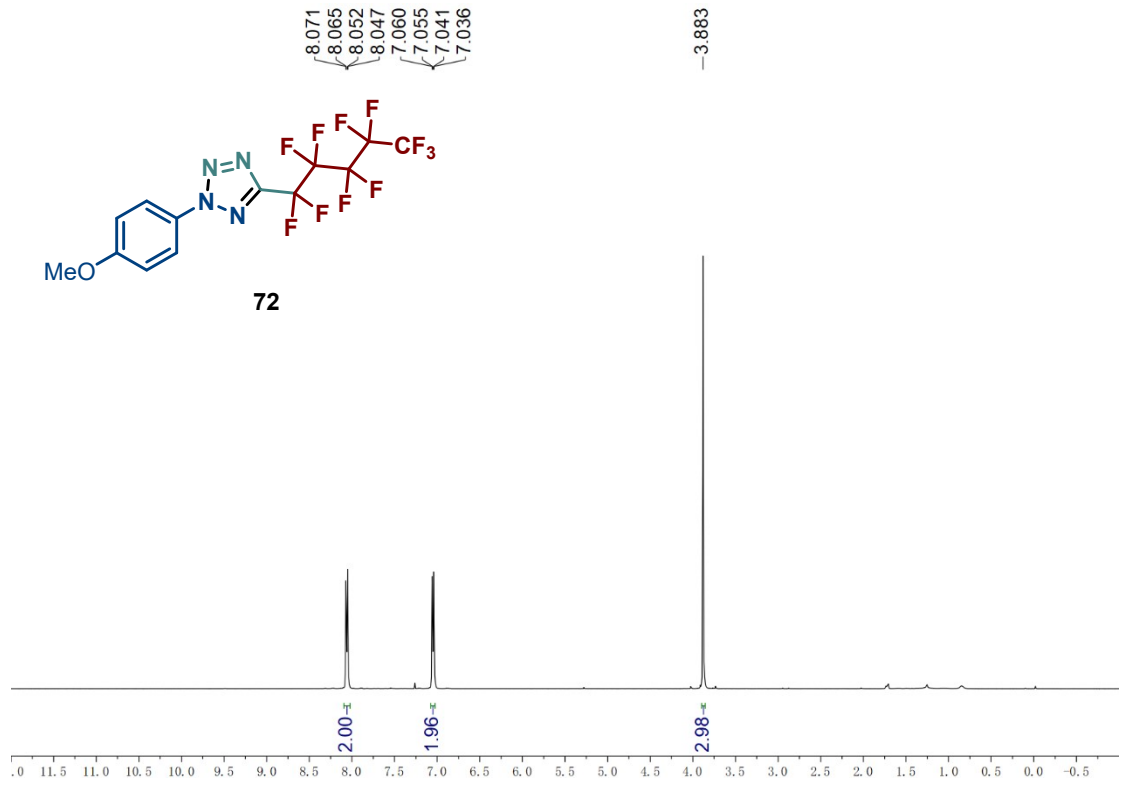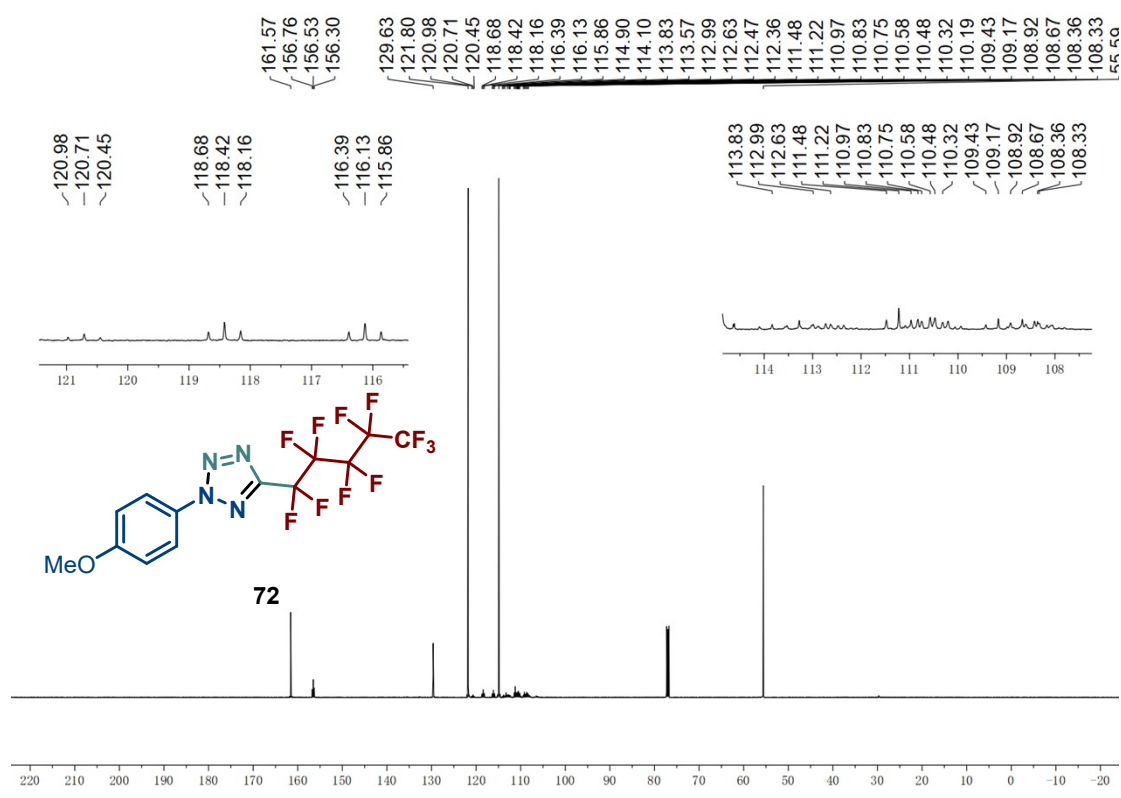

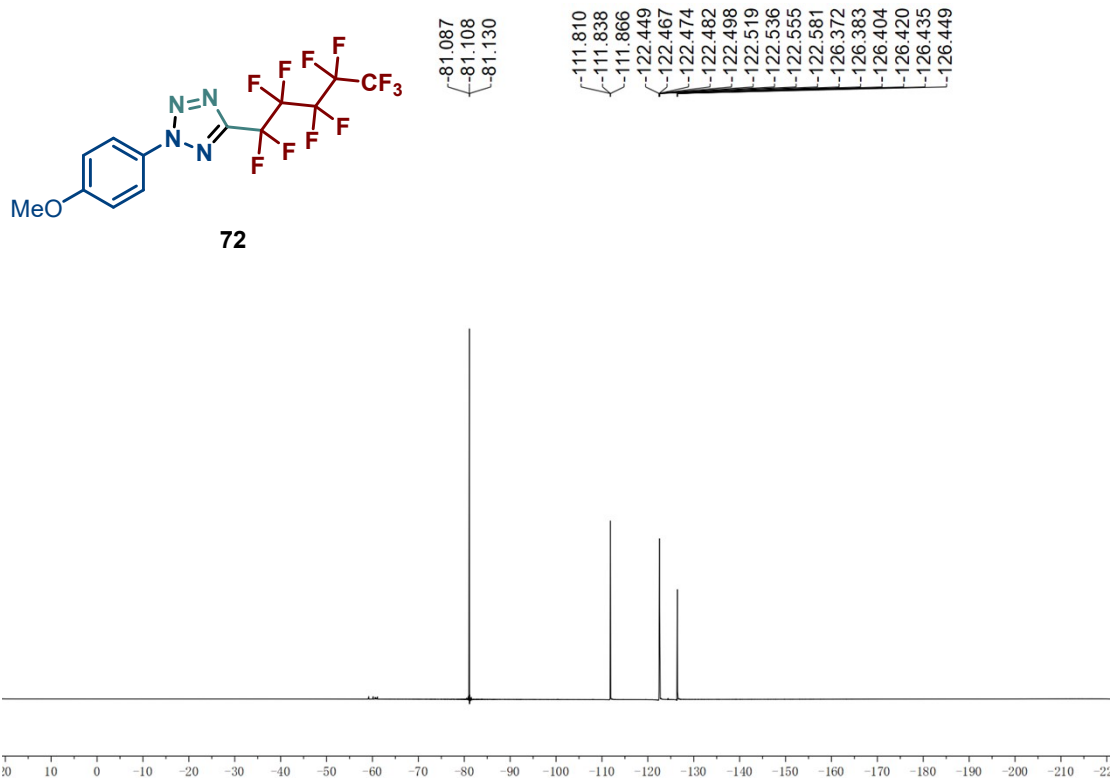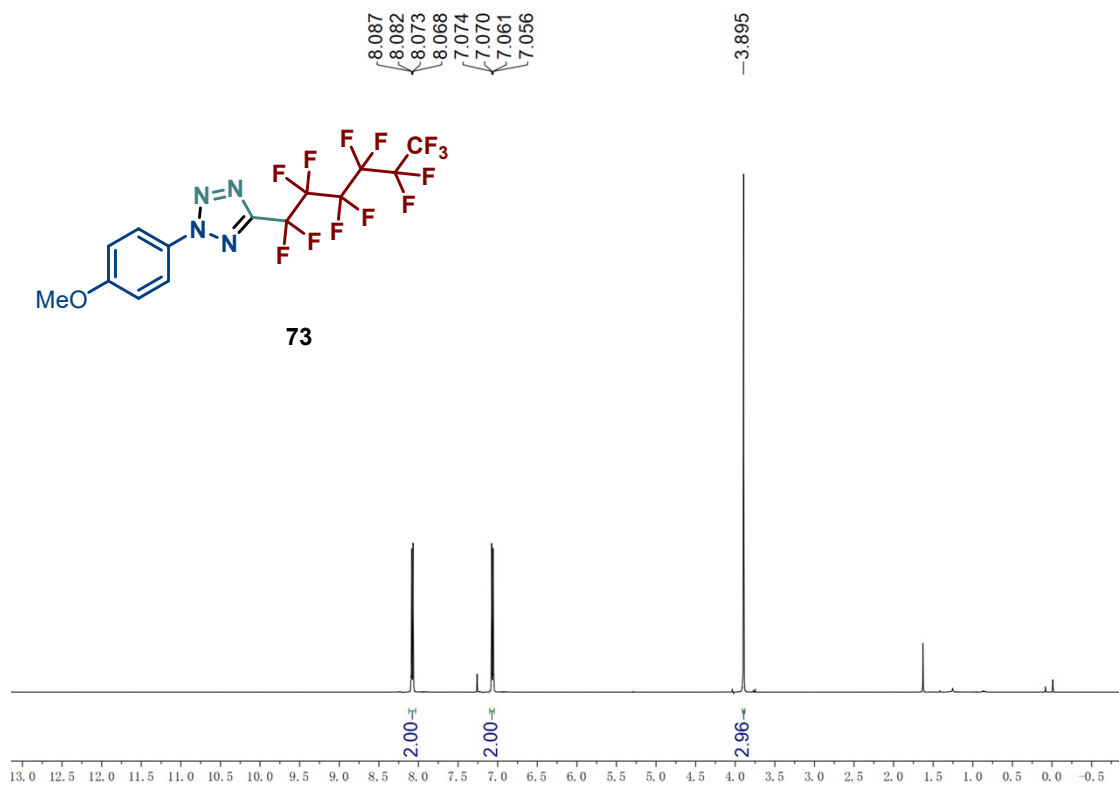

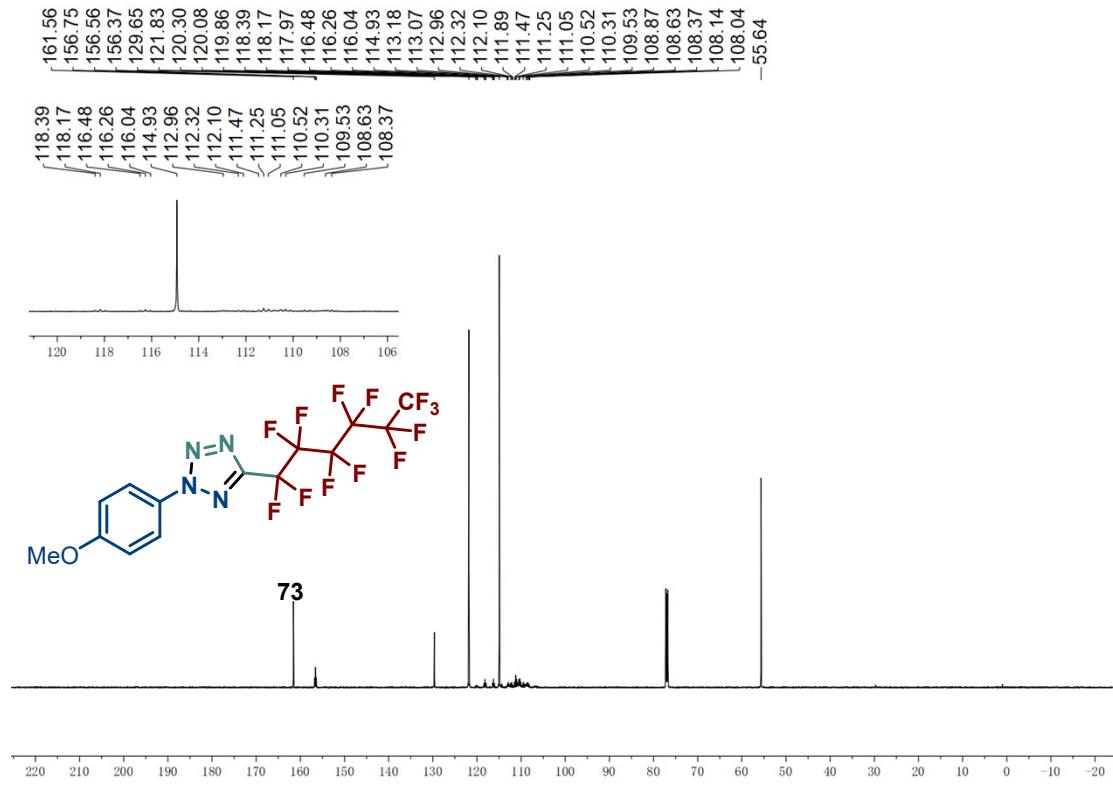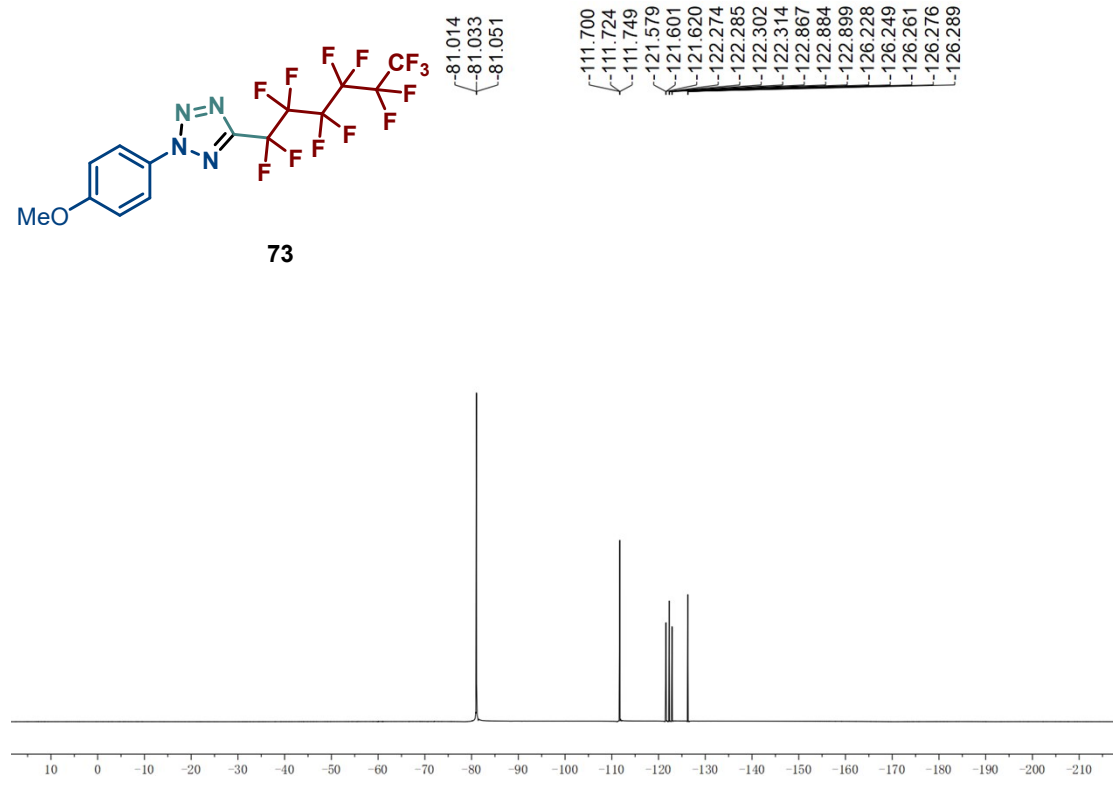

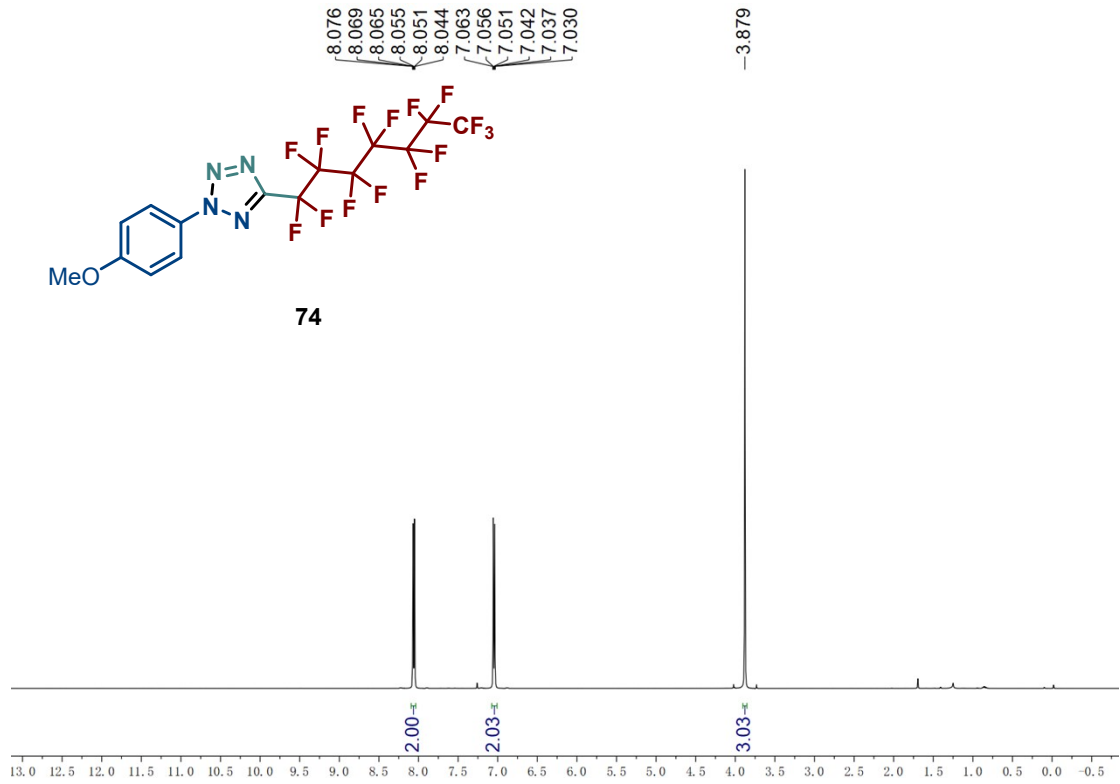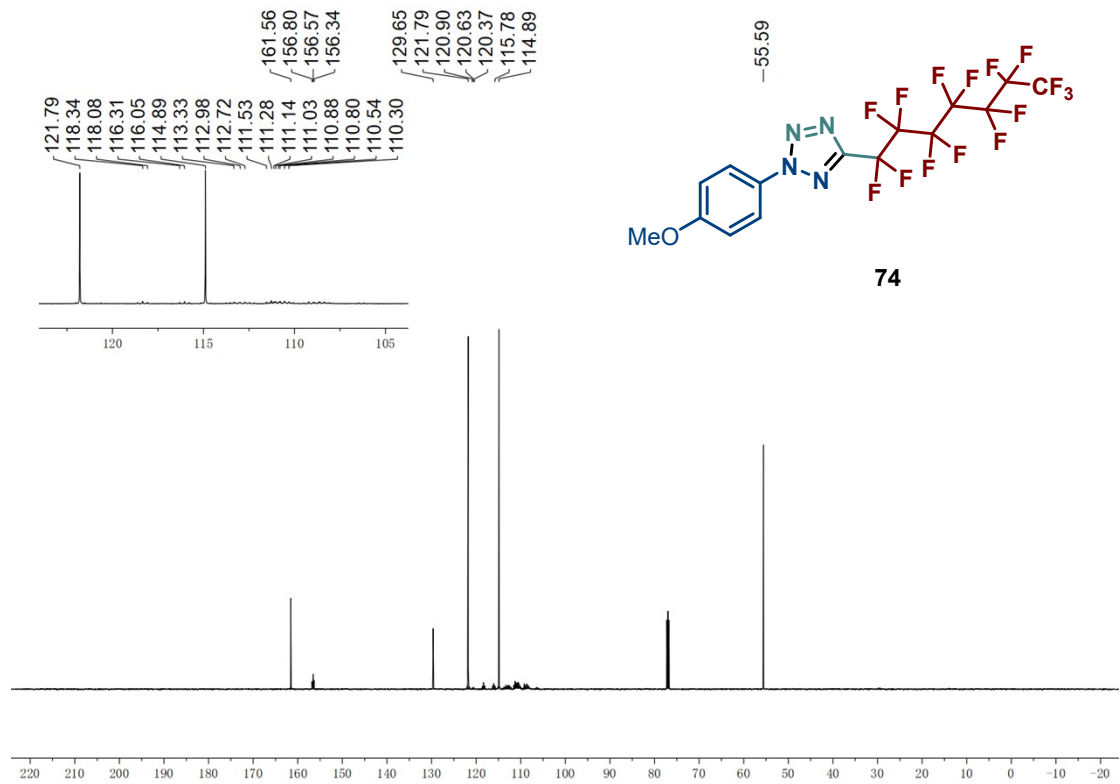

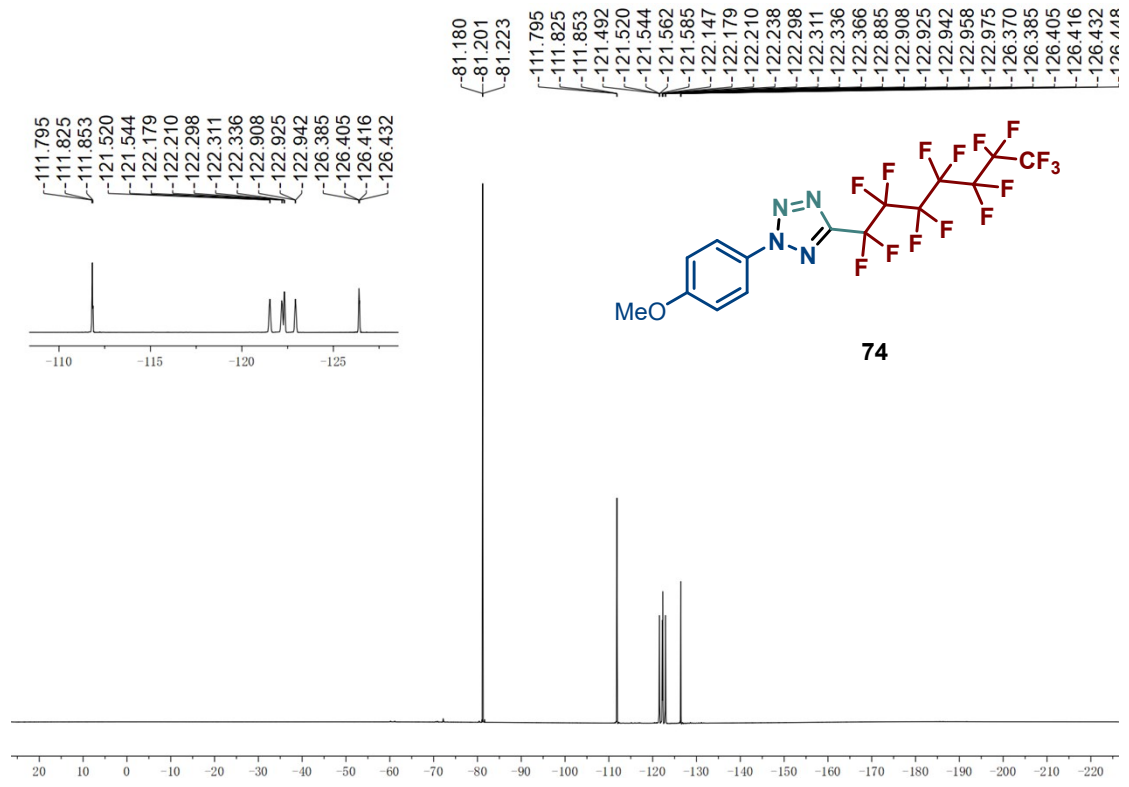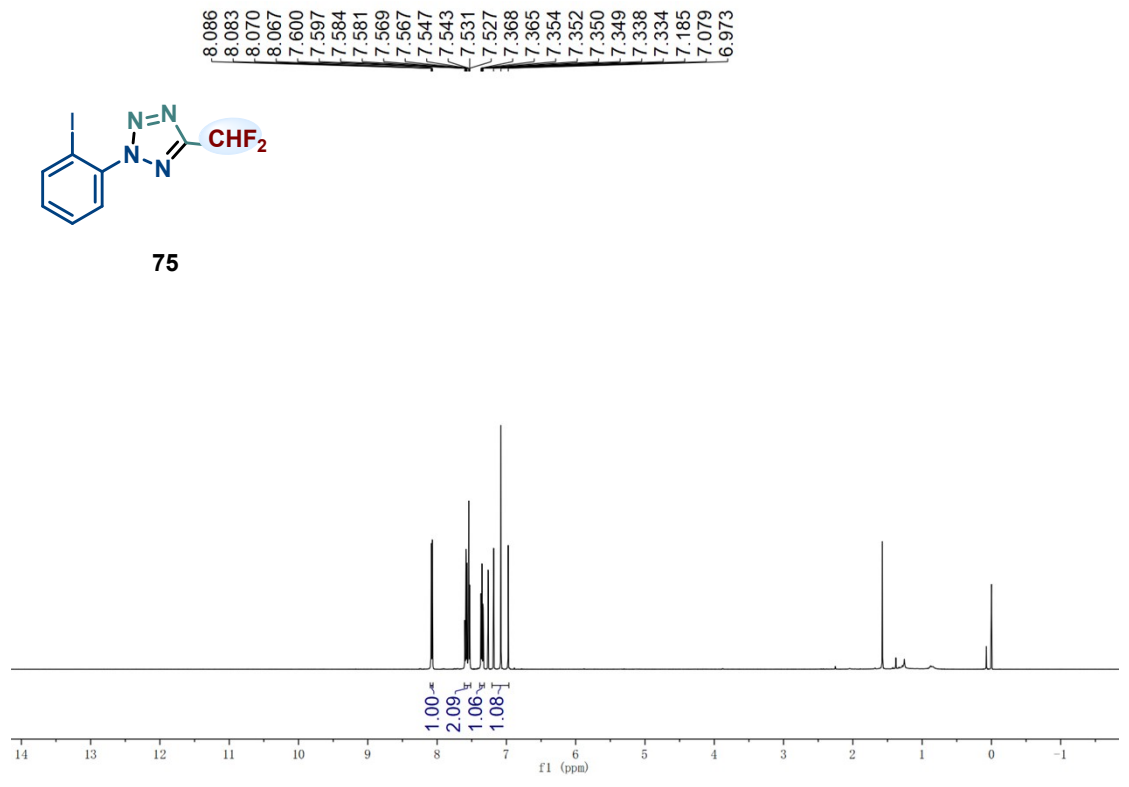

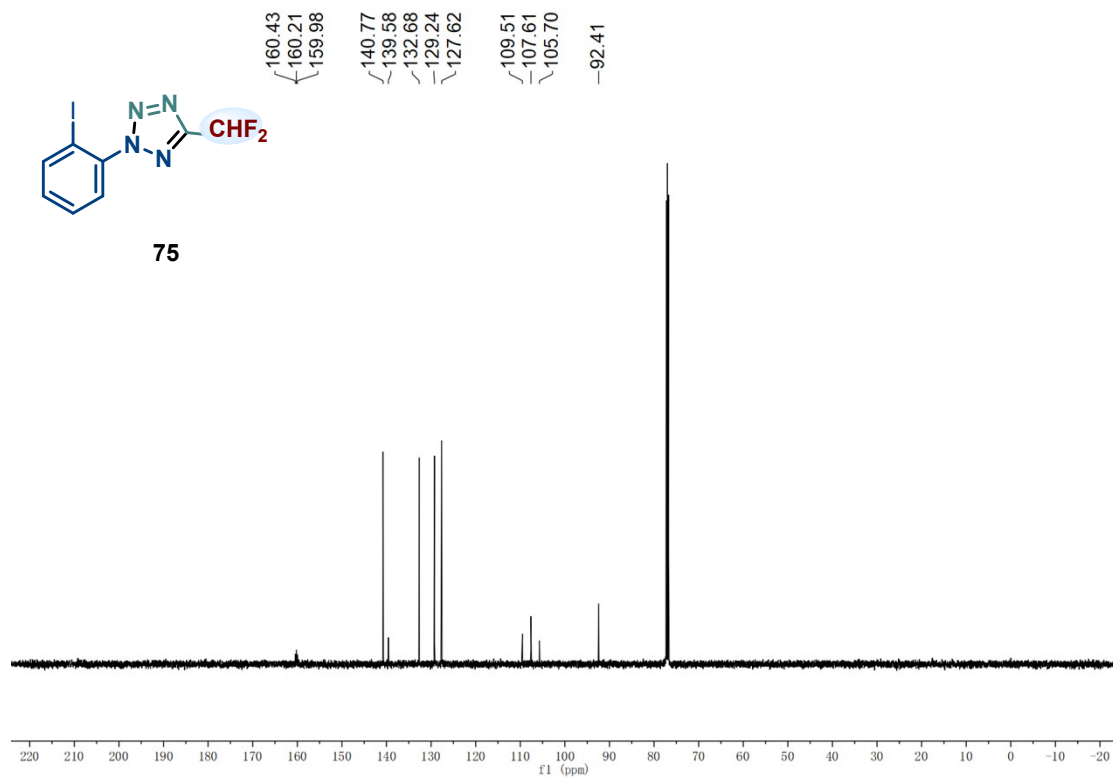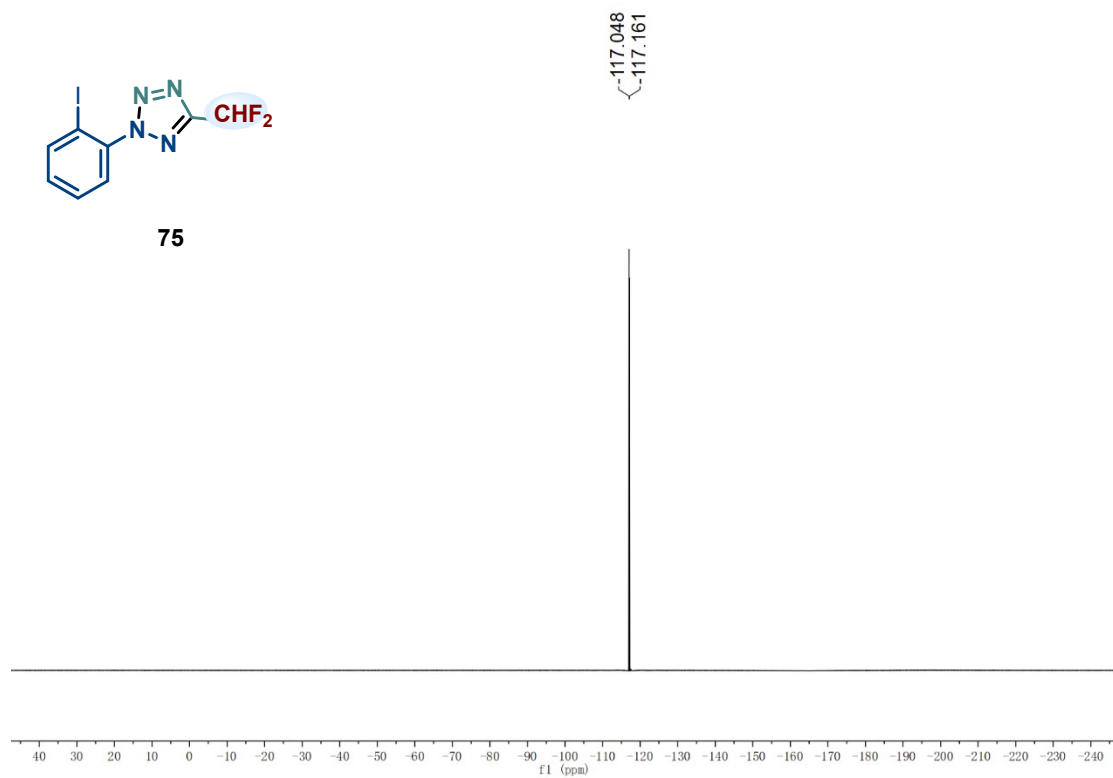

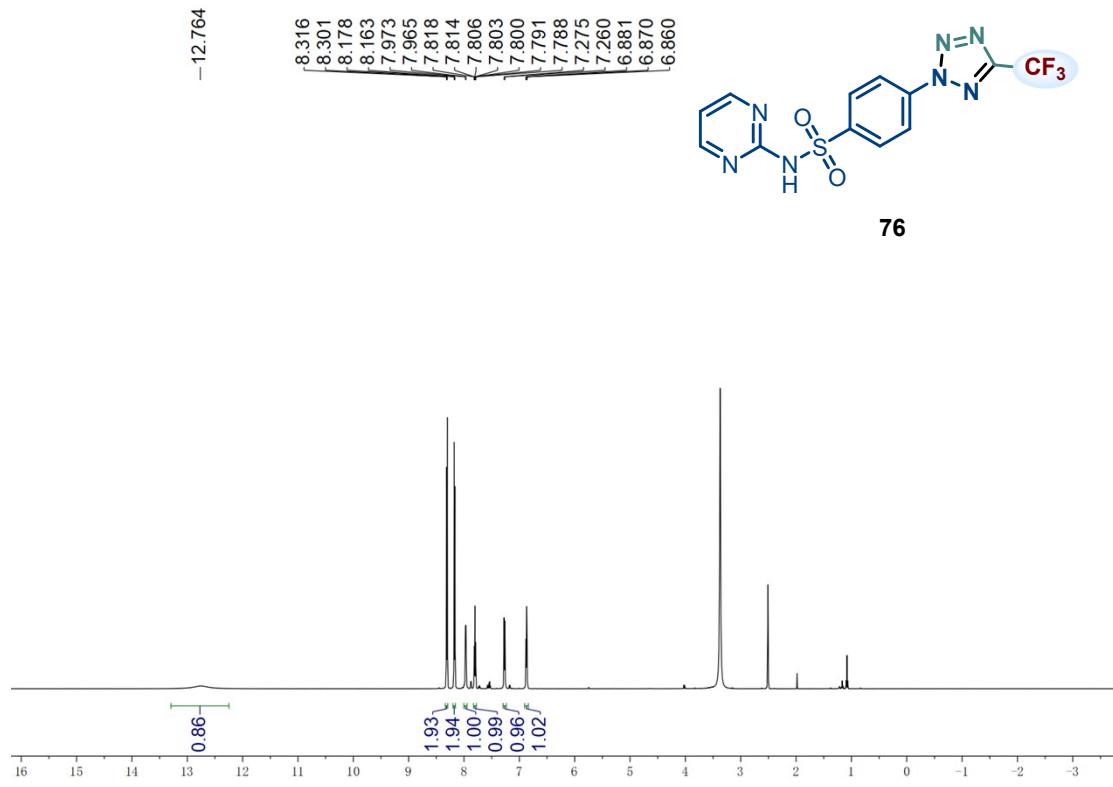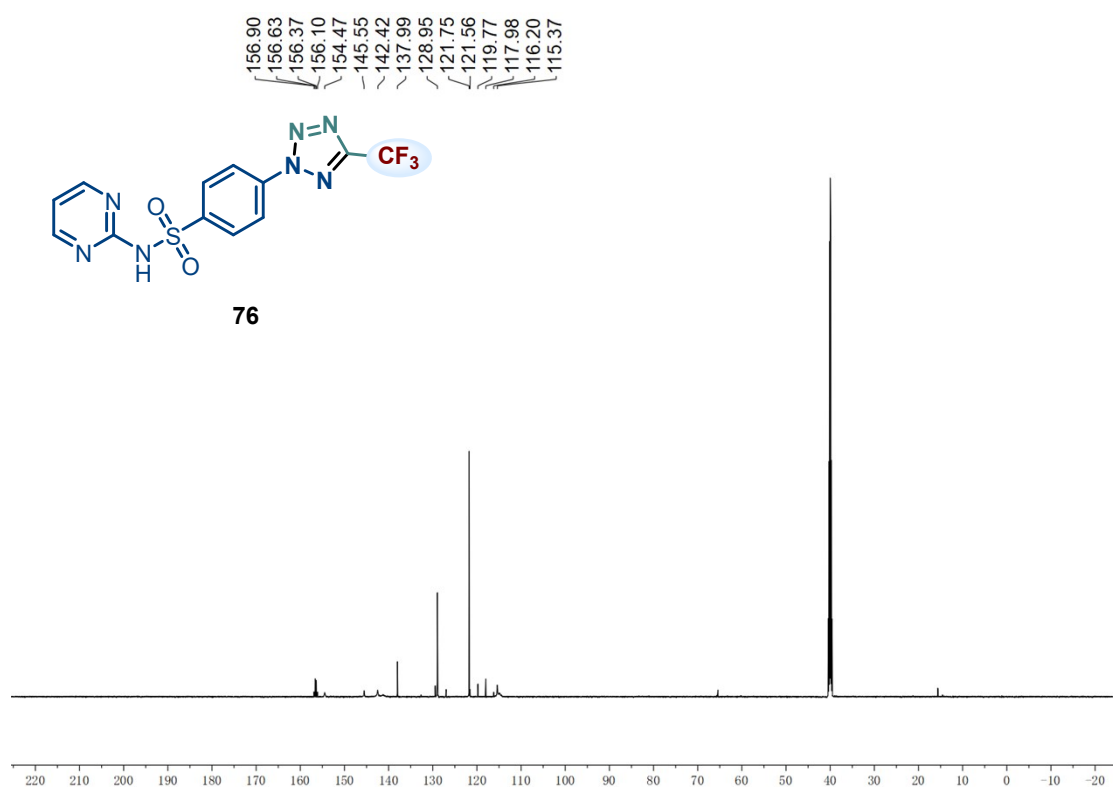

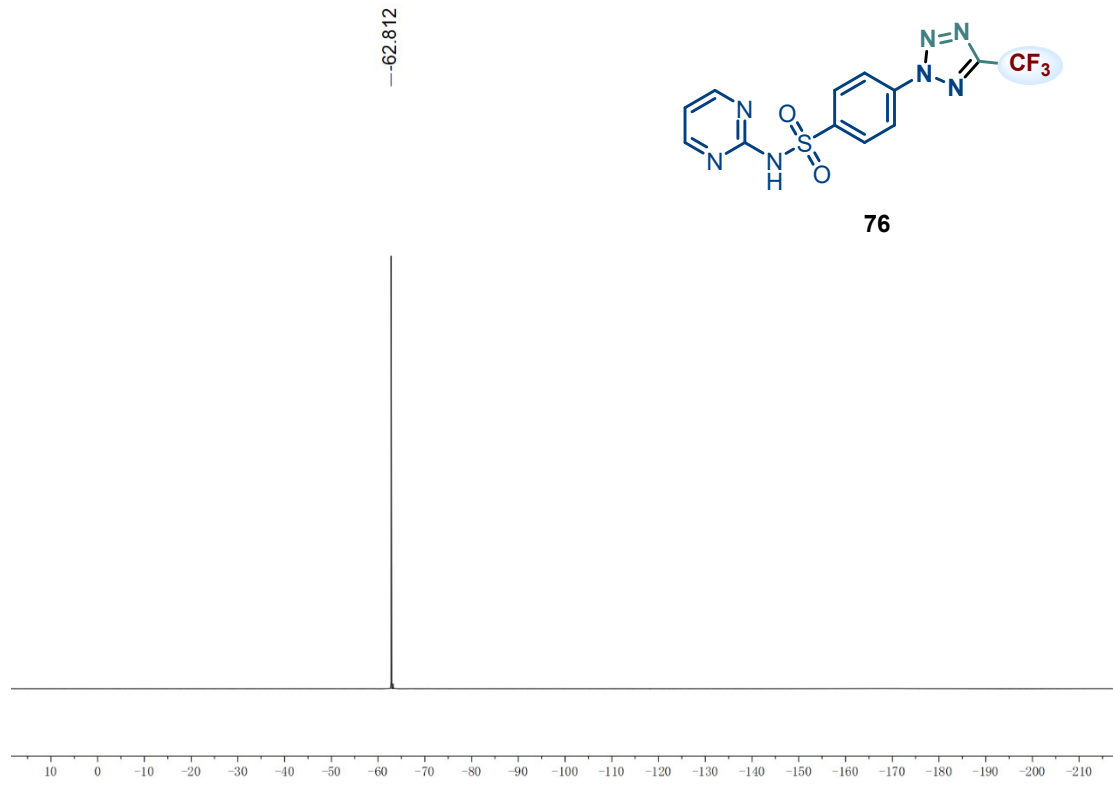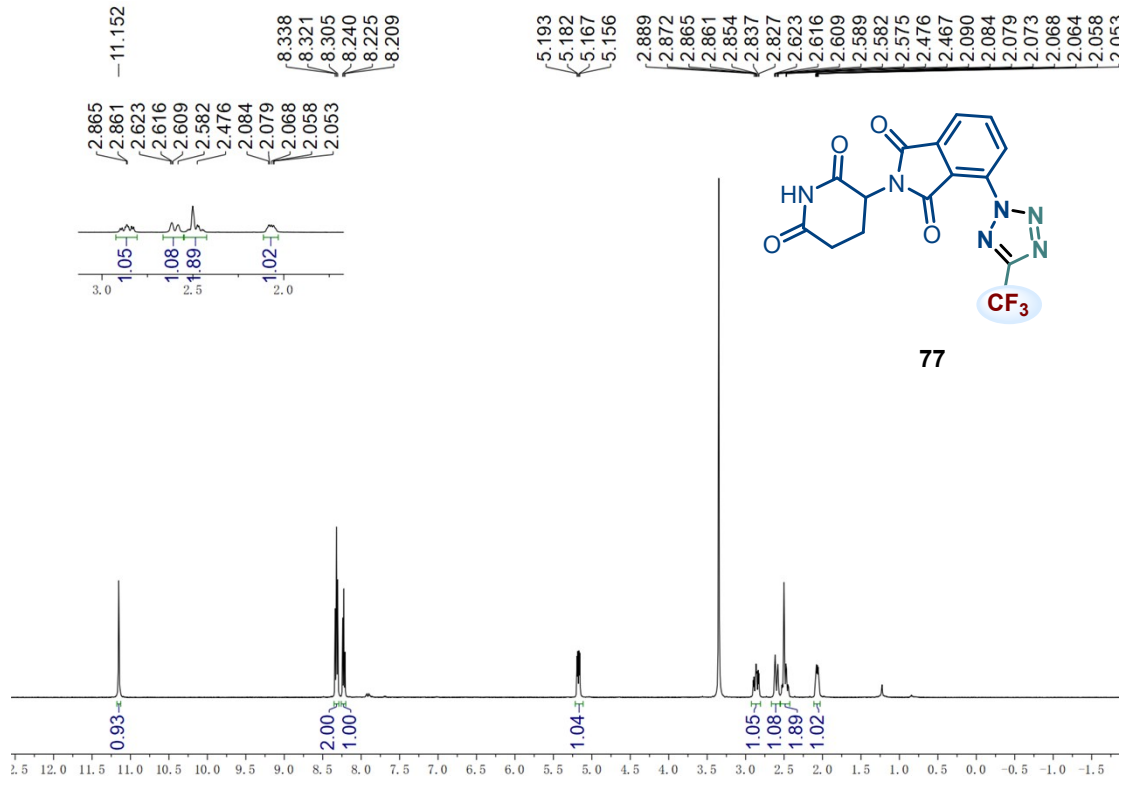



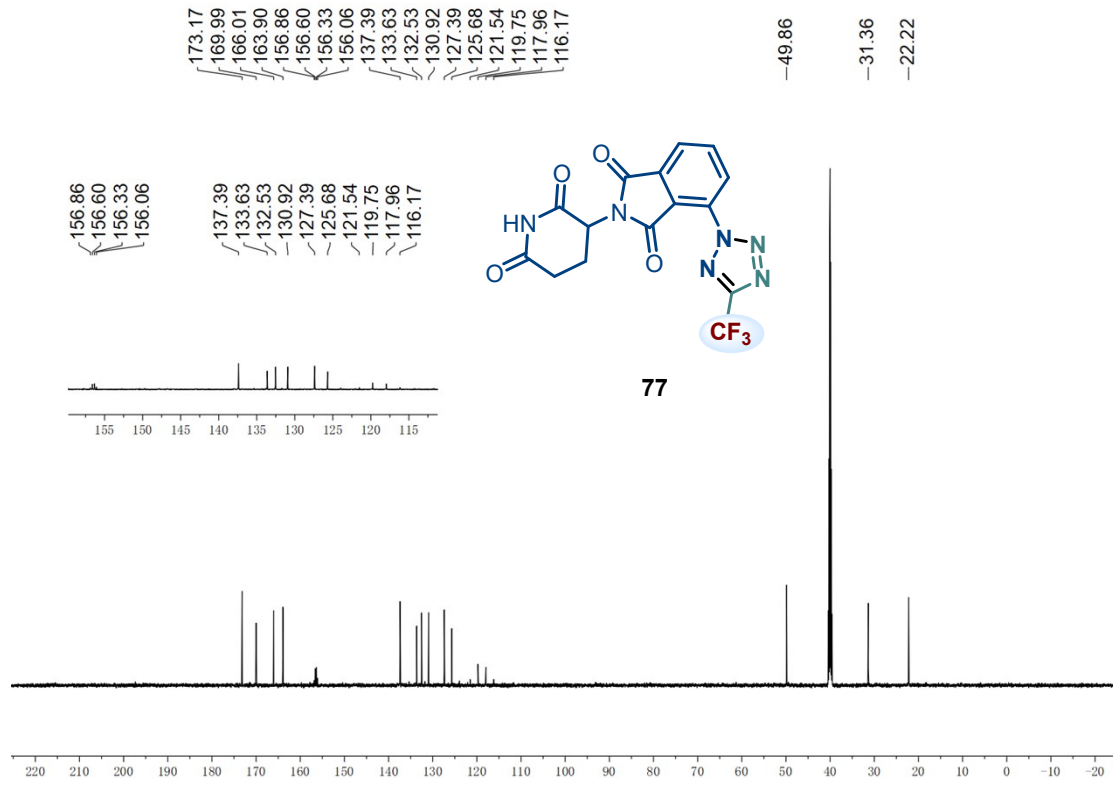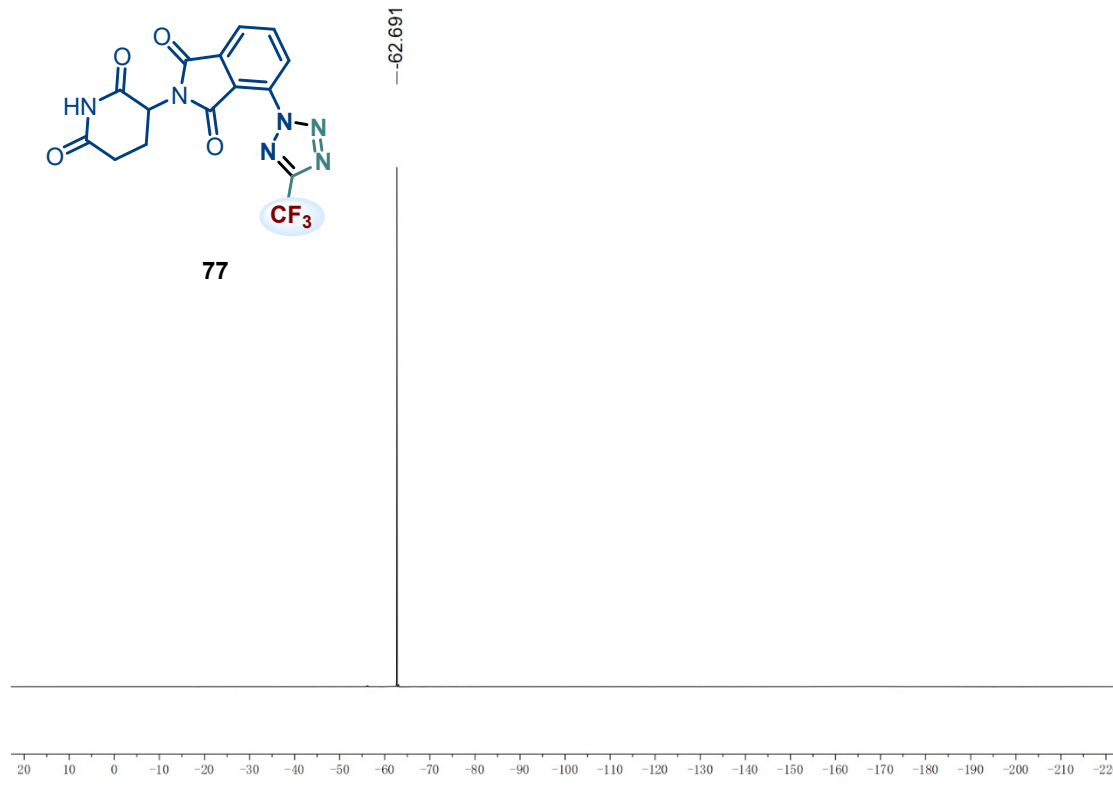

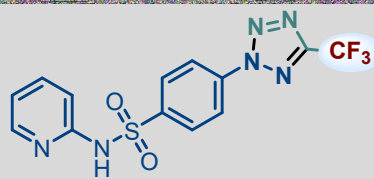

78

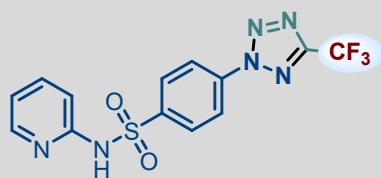

78

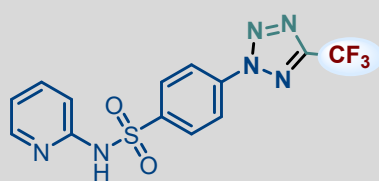

78
